# Supplementary material for: Regioselective Synthesis of New Family of 2-Substituted 1,2,3-Triazoles and Study of Their Fluorescent Properties
Source: MDPI journal article supplement (doi:10.3390/molecules28124822), 2023-06-16
Supplement: s1 [file s1]

## **Supporting Information**

### **Regioselective synthesis of new family of 2-substituted 1,2,3-triazoles and study of their fluorescent properties**

Vasiliy M. Muzalevskiy, Zoia A. Sizova and Valentine G. Nenajdenko\*

Department of Chemistry, Lomonosov Moscow State University, 119899 Moscow, Russia

\* Correspondence: [nenajdenko@org.chem.msu.ru](mailto:nenajdenko@org.chem.msu.ru) (V.G.N.)

**Copies of all NMR spectra**

**S2-S152**

|                        |                                                           |                      |                      |                       |                  |                      |        |
|------------------------|-----------------------------------------------------------|----------------------|----------------------|-----------------------|------------------|----------------------|--------|
| Acquisition Time (sec) | 4.0894                                                    | Comment              | Imported from UXNMR. |                       | Date             | 29 Mar 2022 14:45:06 |        |
| File Name              | C:\DOCS\OUTPUT_301\2022\03.mapr\SZA-BM-2448-7.H.H_001001r |                      |                      |                       | Frequency (MHz)  | 400.13               |        |
| Nucleus                | 1H                                                        | Number of Transients | 4                    | Original Points Count | 32768            | Points Count         | 131072 |
| Pulse Sequence         | zg30                                                      | Solvent              | CHLOROFORM-D         |                       | Sweep Width (Hz) | 8012.82              |        |
| Temperature (degree C) | 27.000                                                    |                      |                      |                       |                  |                      | F      |

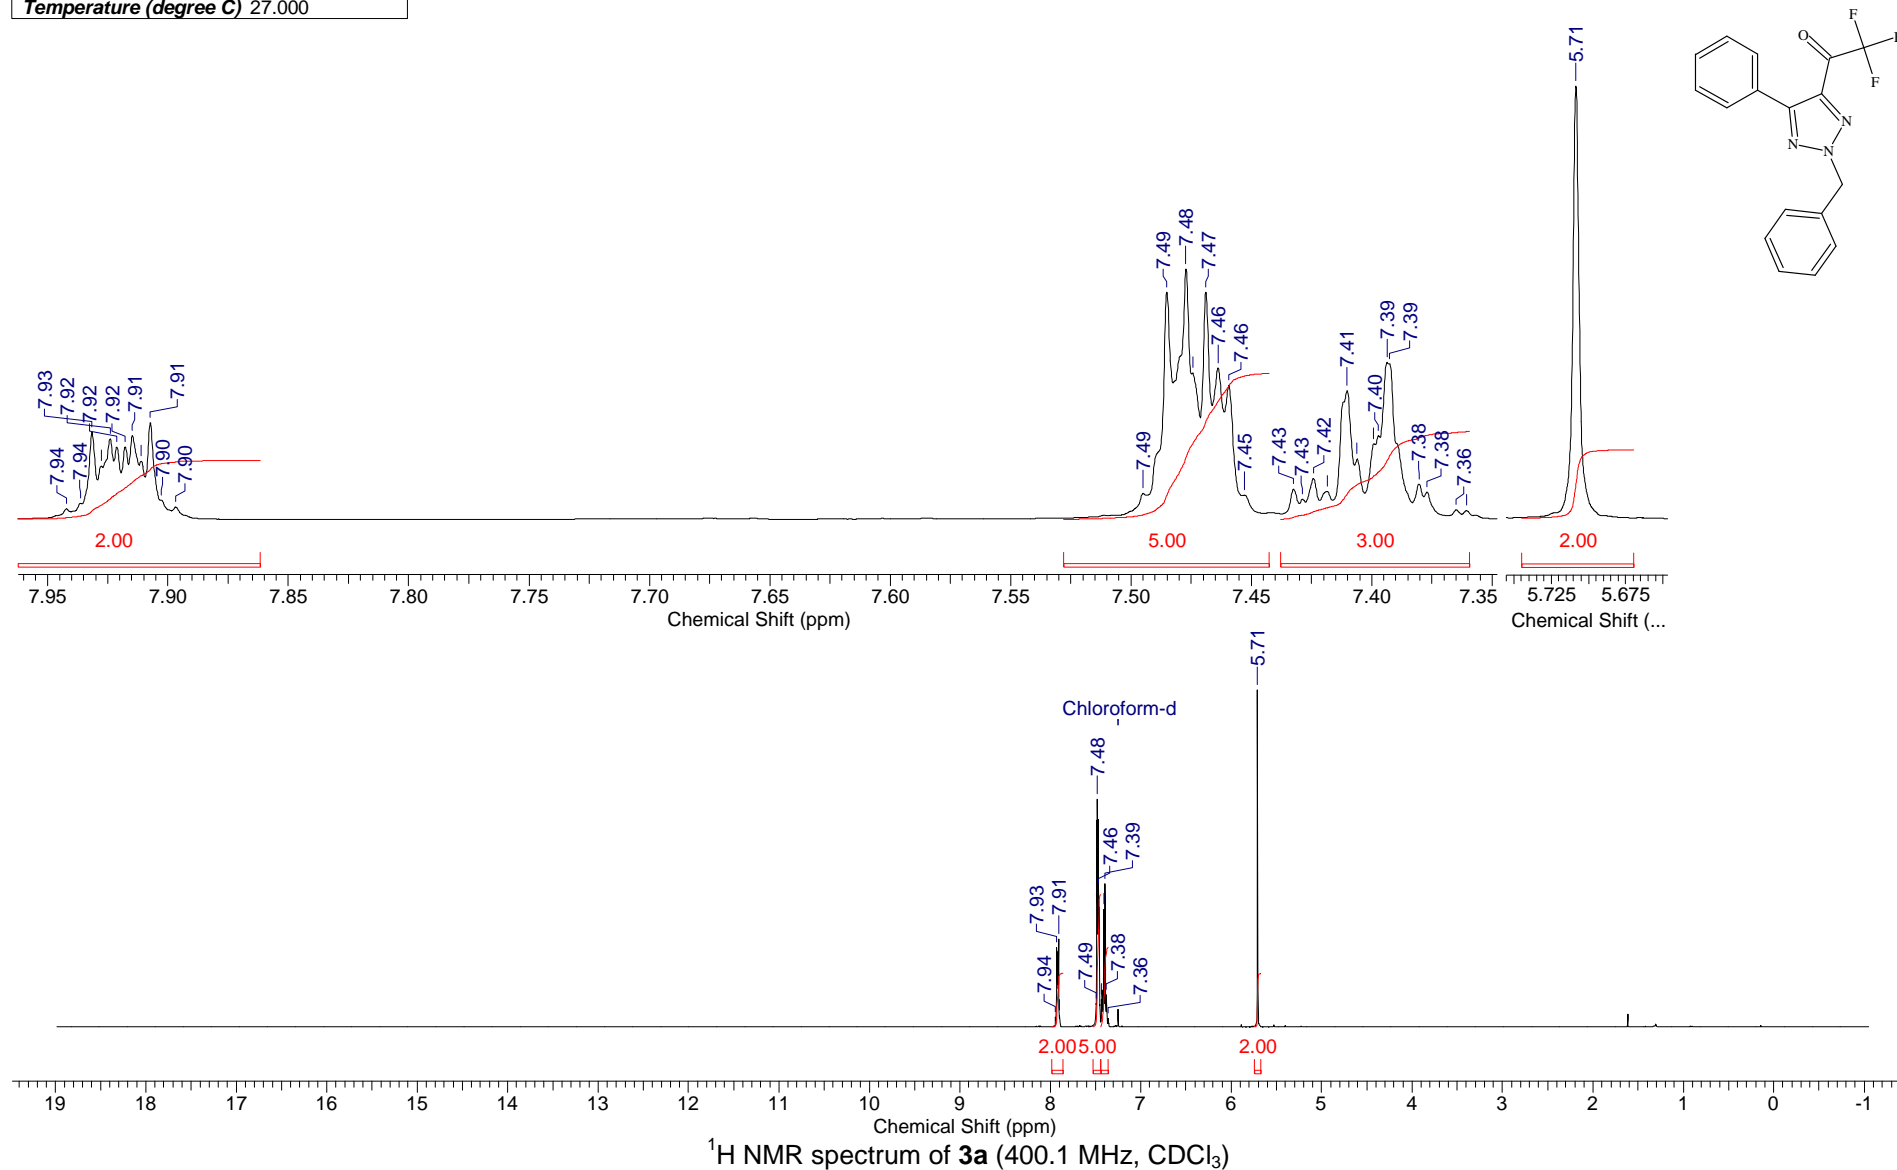

|                        |                                                         |                      |                      |                       |                  |                      |        |
|------------------------|---------------------------------------------------------|----------------------|----------------------|-----------------------|------------------|----------------------|--------|
| Acquisition Time (sec) | 1.7433                                                  | Comment              | Imported from UXNMR. |                       | Date             | 29 Mar 2022 14:56:42 |        |
| File Name              | C:\DOCS\OUTPUT_301\2022\03.mapr\SZA-BM-2448-7.F_005001r |                      |                      |                       | Frequency (MHz)  | 376.50               |        |
| Nucleus                | 19F                                                     | Number of Transients | 4                    | Original Points Count | 131072           | Points Count         | 262144 |
| Pulse Sequence         | zgfgqn                                                  | Solvent              | CHLOROFORM-D         |                       | Sweep Width (Hz) | 75187.97             |        |
| Temperature (degree C) | 27.000                                                  |                      |                      |                       |                  |                      |        |

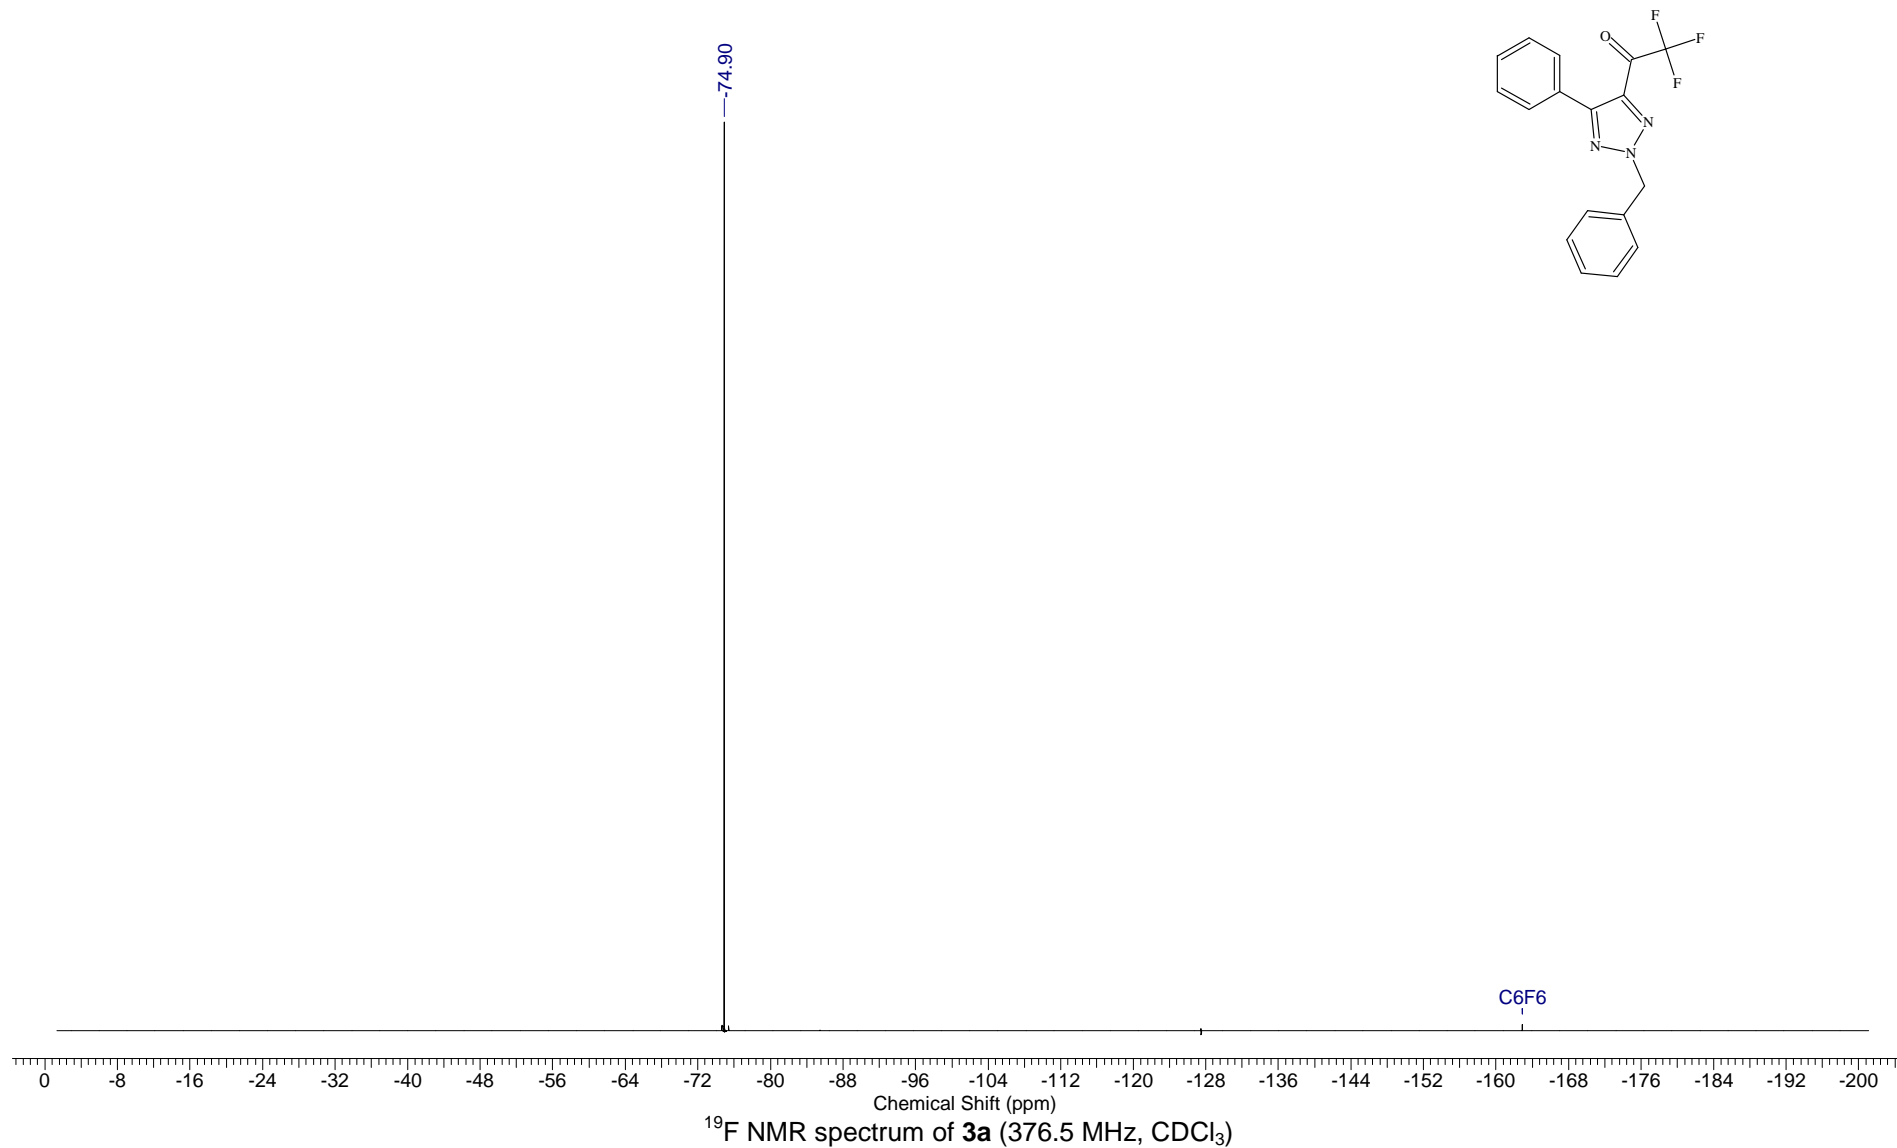

|                        |                                                         |                      |                      |                       |                 |                        |        |
|------------------------|---------------------------------------------------------|----------------------|----------------------|-----------------------|-----------------|------------------------|--------|
| Acquisition Time (sec) | 0.6783                                                  | Comment              | Imported from UXNMR. |                       | Date            | 31 Mar 2022 12:08:00   |        |
| File Name              | C:\DOCS\OUTPUT_301\2022\03.mapr\SZA-BM-2448-7.C_002001r |                      |                      |                       | Frequency (MHz) | 100.61                 |        |
| Nucleus                | 13C                                                     | Number of Transients | 73                   | Original Points Count | 16384           | Points Count           | 131072 |
| Pulse Sequence         | zgpg30                                                  | Solvent              | DMSO-D6              | Sweep Width (Hz)      | 24154.59        | Temperature (degree C) | 27.000 |

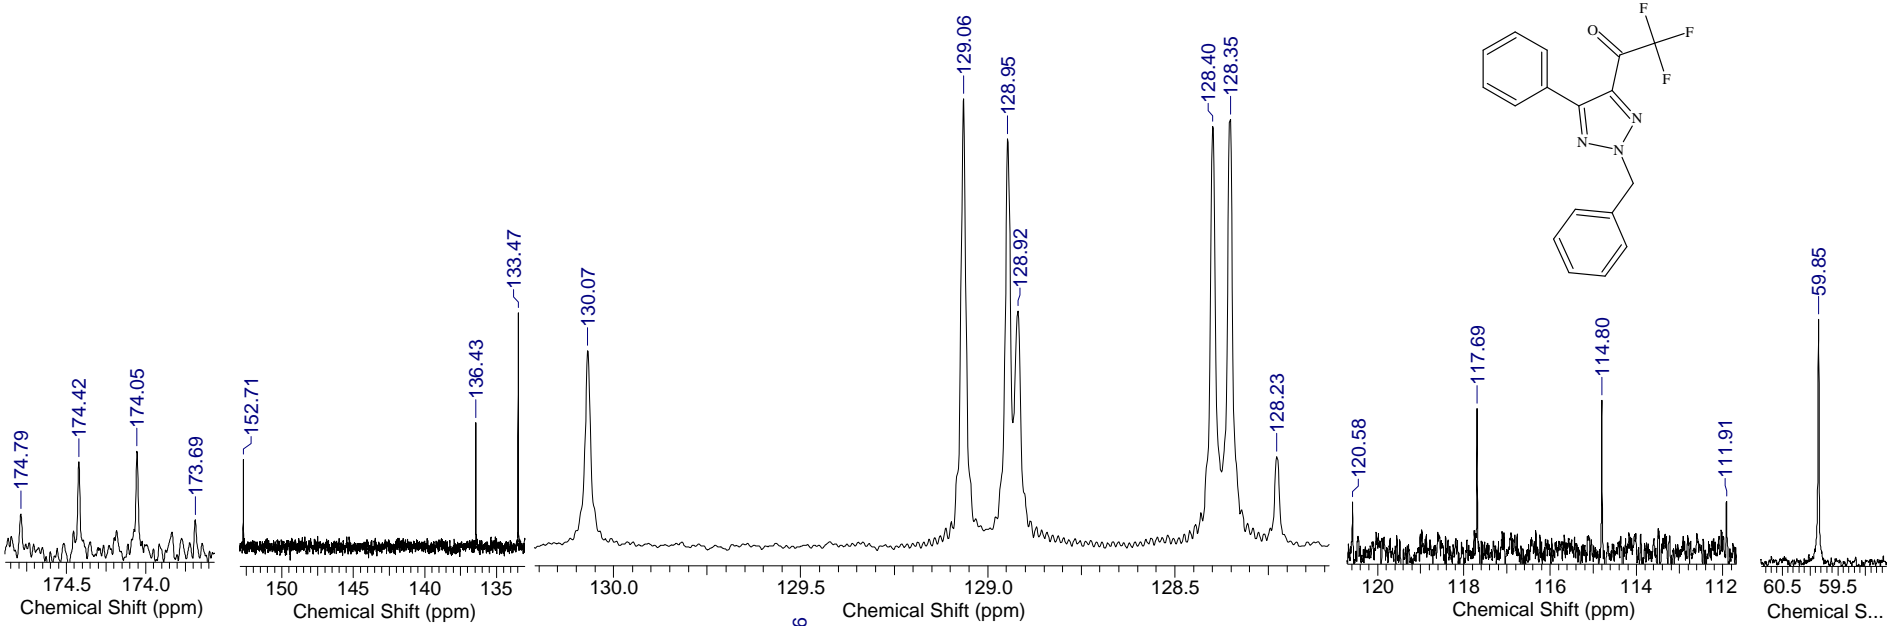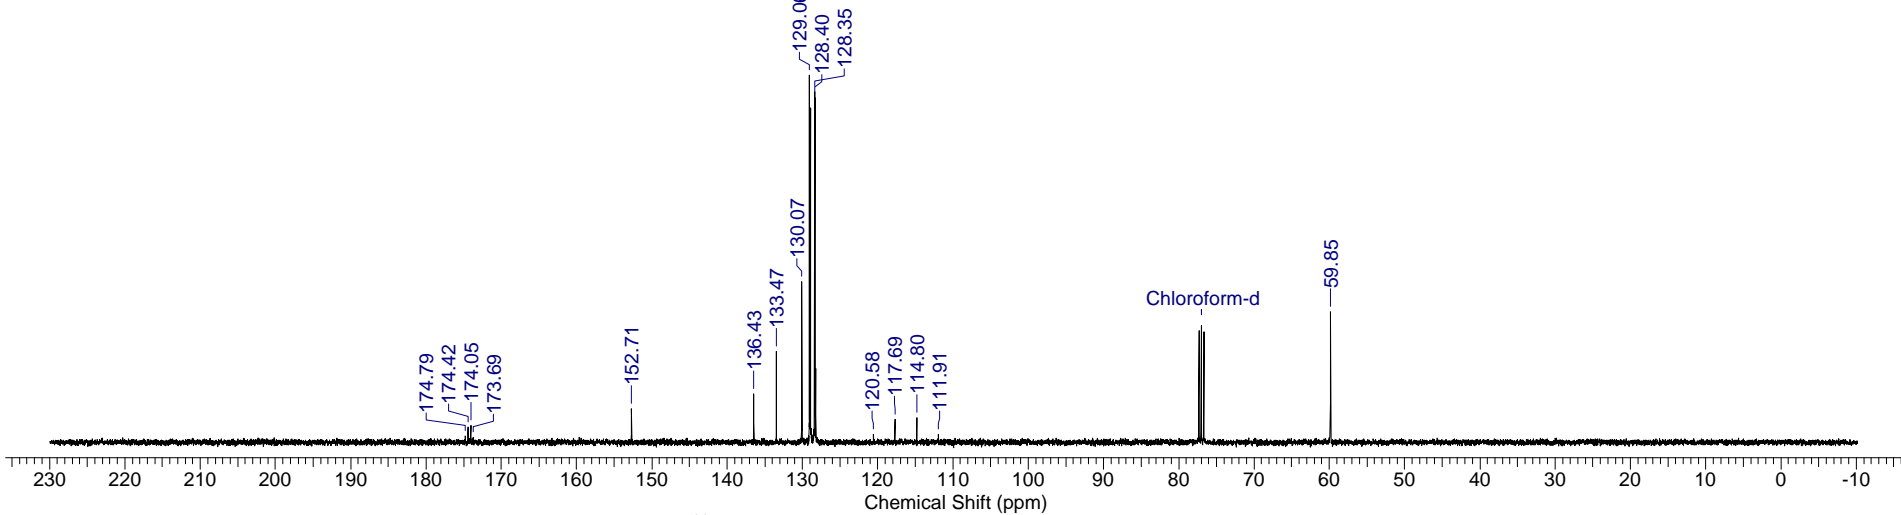

<sup>13</sup>C NMR spectrum of 3a (100.6 MHz, CDCl<sub>3</sub>)

|                               |                                                         |                             |                      |                              |                      |
|-------------------------------|---------------------------------------------------------|-----------------------------|----------------------|------------------------------|----------------------|
| <b>Acquisition Time (sec)</b> | 4.0894                                                  | <b>Comment</b>              | Imported from UXNMR. | <b>Date</b>                  | 30 Mar 2022 17:43:12 |
| <b>File Name</b>              | C:\DOCS\OUTPUT_301\2022\03.mapr\SA-BM-2448-25.H_001001r | <b>Frequency (MHz)</b>      | 400.13               | <b>Points Count</b>          | 131072               |
| <b>Nucleus</b>                | <sup>1</sup> H                                          | <b>Number of Transients</b> | 4                    | <b>Original Points Count</b> | 32768                |
| <b>Pulse Sequence</b>         | zg30                                                    | <b>Solvent</b>              | CHLOROFORM-D         | <b>Sweep Width (Hz)</b>      | 8012.82              |
| <b>Temperature (degree C)</b> | 27.000                                                  |                             |                      |                              |                      |

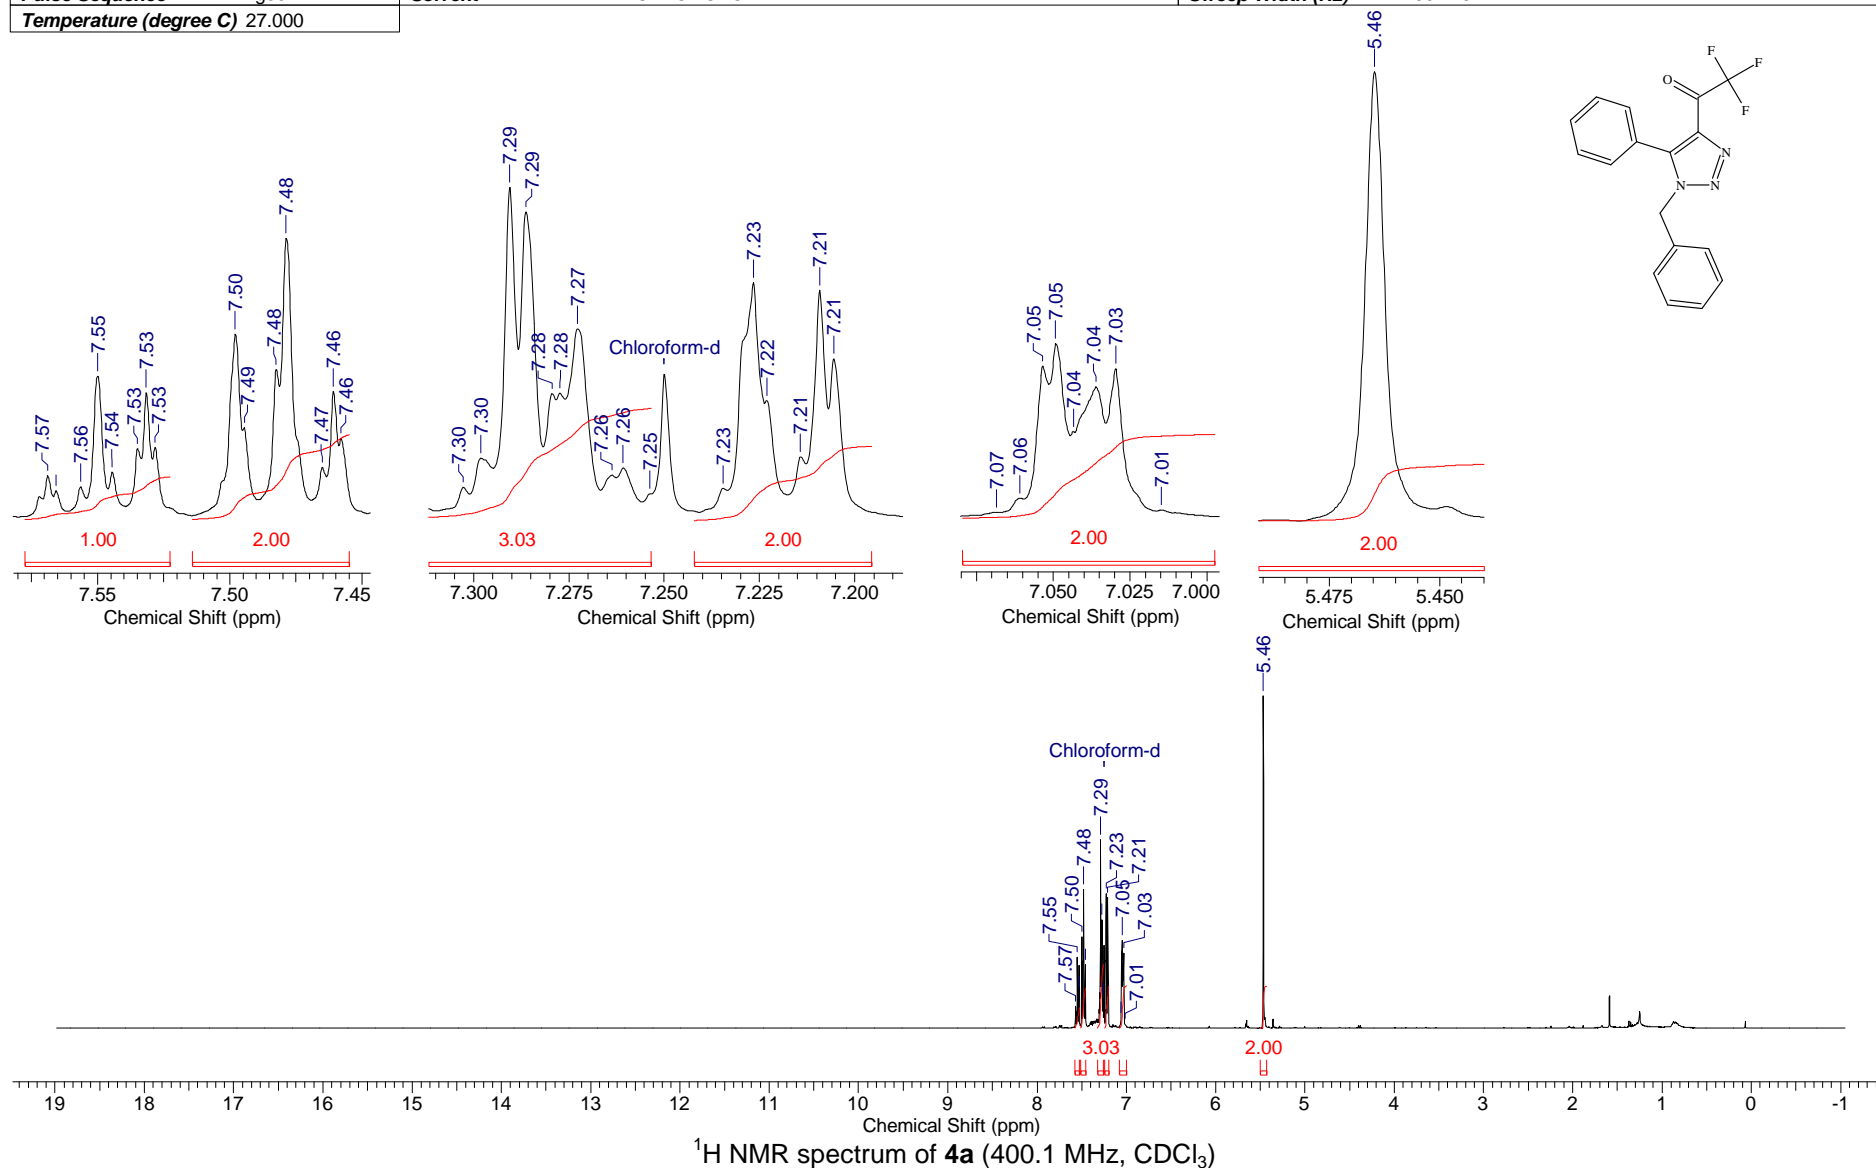

|                               |                                                         |                             |                      |                              |                      |
|-------------------------------|---------------------------------------------------------|-----------------------------|----------------------|------------------------------|----------------------|
| <b>Acquisition Time (sec)</b> | 1.7433                                                  | <b>Comment</b>              | Imported from UXNMR. | <b>Date</b>                  | 29 Mar 2022 15:15:50 |
| <b>File Name</b>              | C:\DOCS\OUTPUT_301\2022\03.mapr\SA-BM-2448-21.F_005001r | <b>Frequency (MHz)</b>      | 376.50               |                              |                      |
| <b>Nucleus</b>                | <sup>19</sup> F                                         | <b>Number of Transients</b> | 4                    | <b>Original Points Count</b> | 131072               |
| <b>Pulse Sequence</b>         | zgfgqn                                                  | <b>Points Count</b>         | 262144               | <b>Sweep Width (Hz)</b>      | 75187.97             |
| <b>Temperature (degree C)</b> | 27.000                                                  | <b>Solvent</b>              | CHLOROFORM-D         |                              |                      |

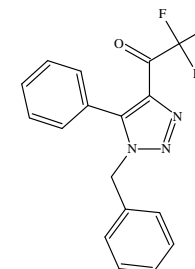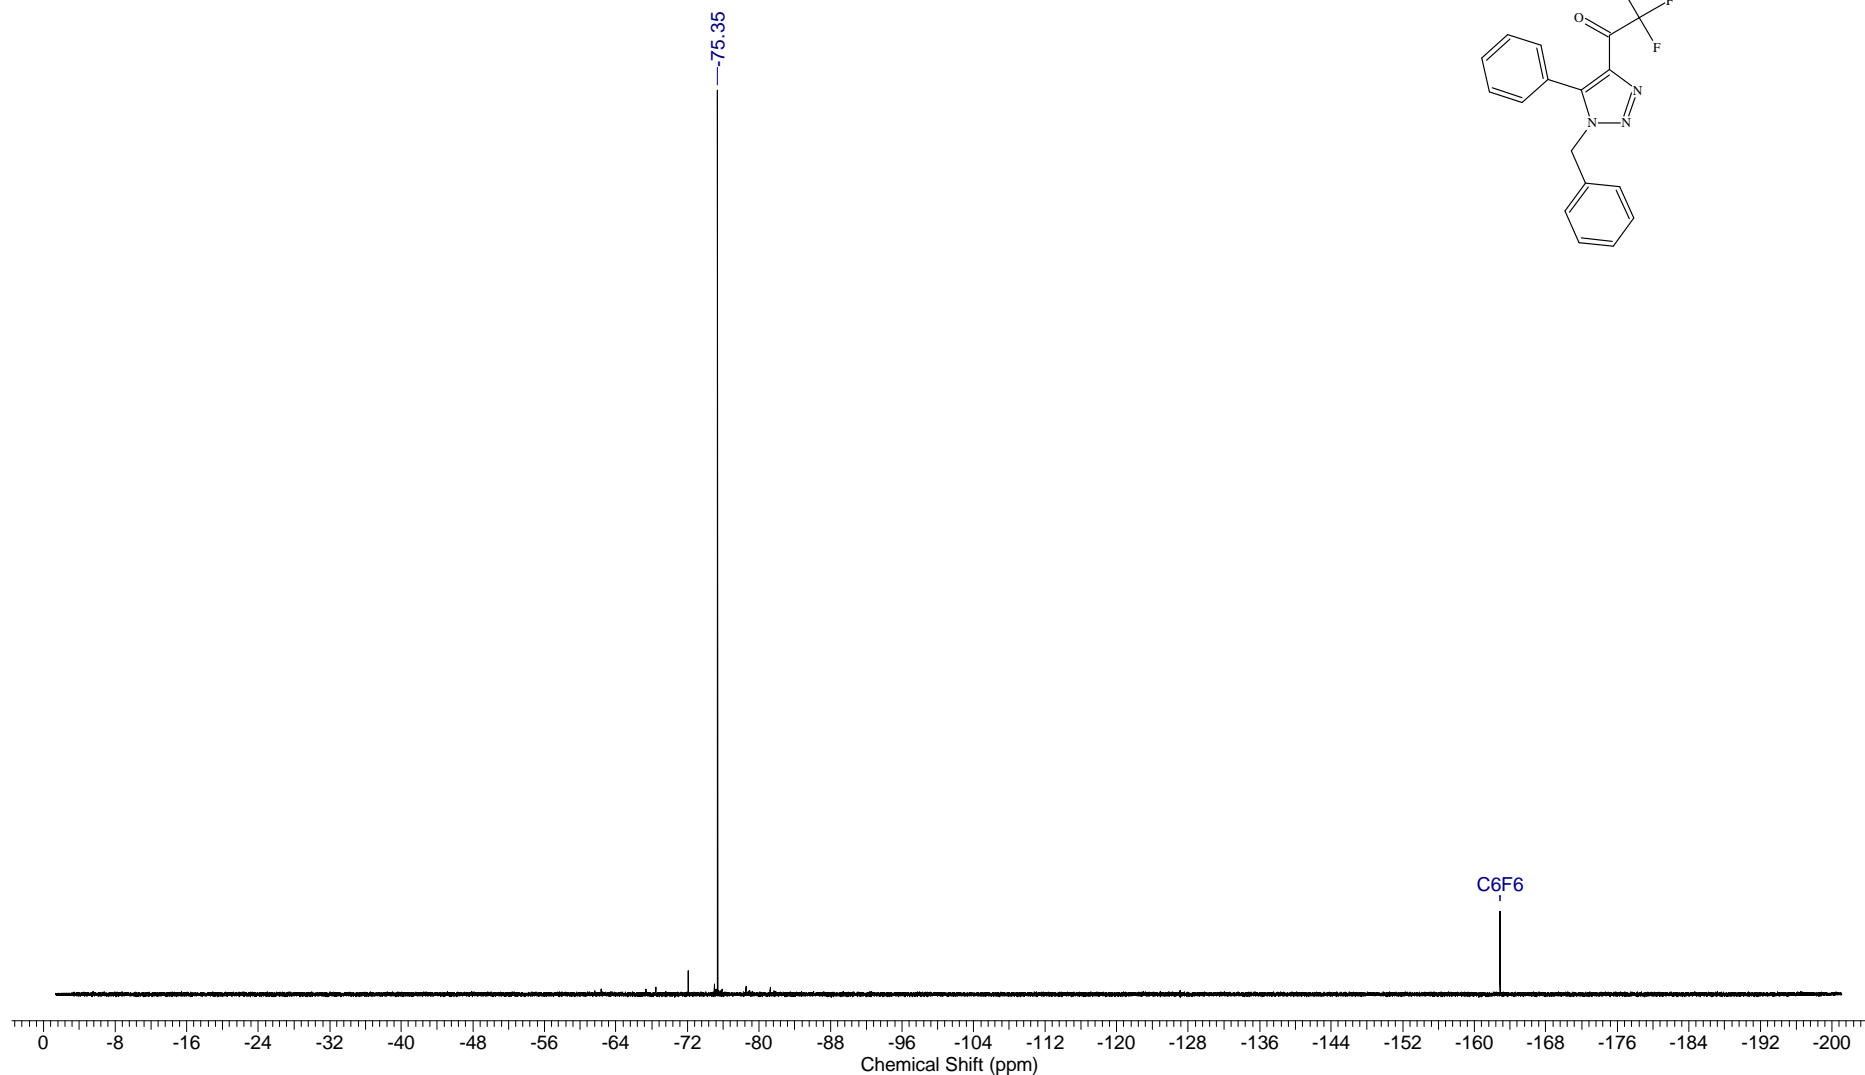

<sup>19</sup>F NMR spectrum of **4a** (376.5 MHz, CDCl<sub>3</sub>)

|                        |                                                         |                      |                      |                       |                 |                        |        |
|------------------------|---------------------------------------------------------|----------------------|----------------------|-----------------------|-----------------|------------------------|--------|
| Acquisition Time (sec) | 0.6783                                                  | Comment              | Imported from UXNMR. |                       | Date            | 31 Mar 2022 15:24:40   |        |
| File Name              | C:\DOCS\OUTPUT_301\2022\03.mapr\SA-BM-2448-25.C_002001r |                      |                      |                       | Frequency (MHz) | 100.61                 |        |
| Nucleus                | 13C                                                     | Number of Transients | 347                  | Original Points Count | 16384           | Points Count           | 131072 |
| Pulse Sequence         | zgpg30                                                  | Solvent              | DMSO-D6              | Sweep Width (Hz)      | 24154.59        | Temperature (degree C) | 27.000 |

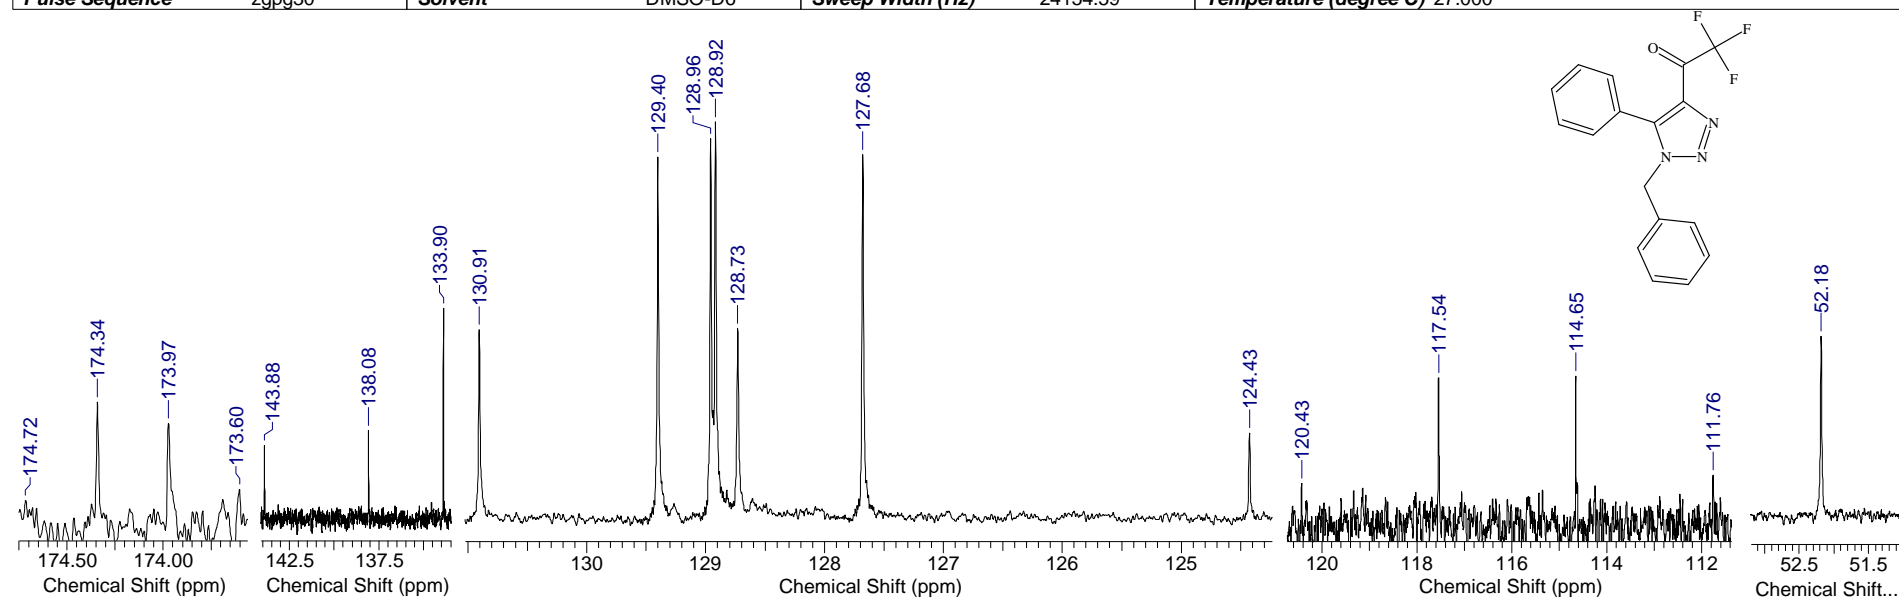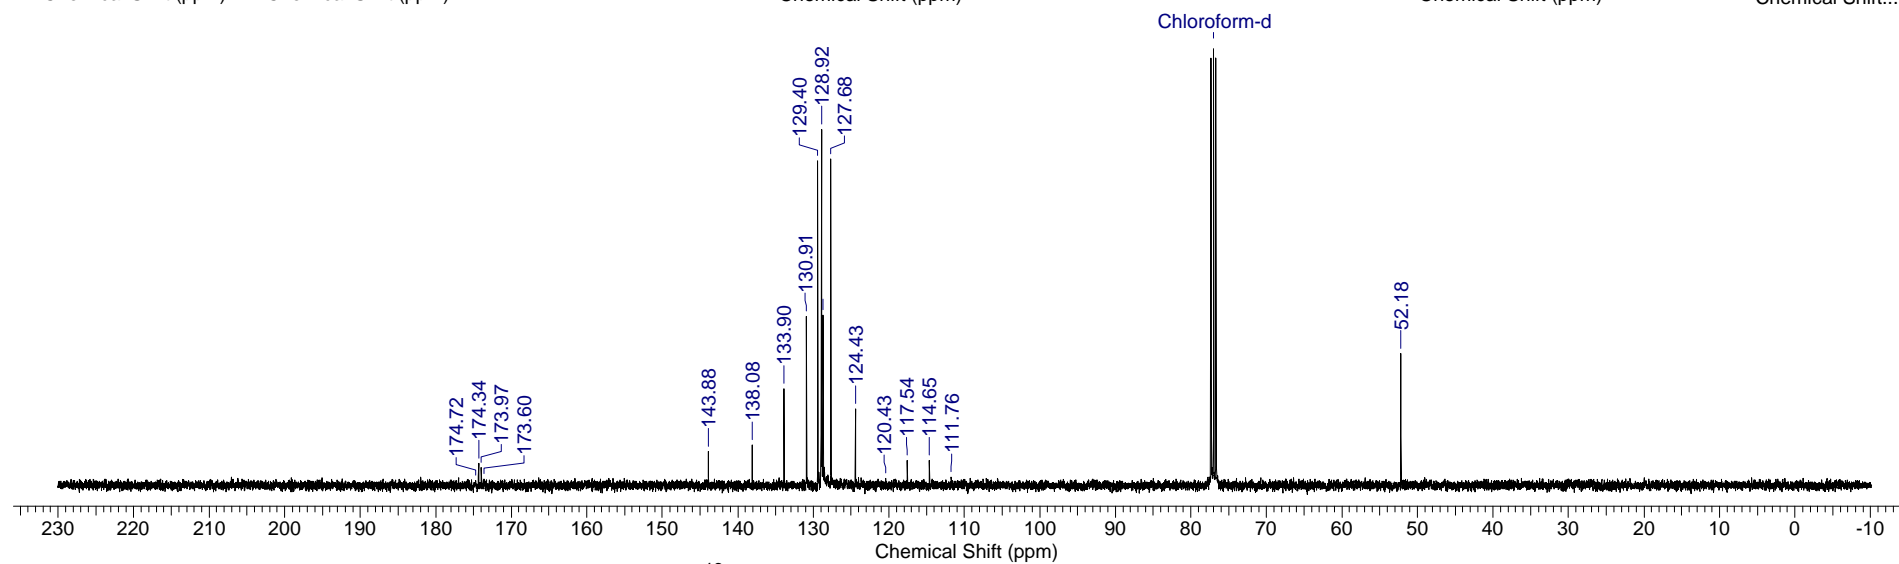<sup>13</sup>C NMR spectrum of **4a** (100.6 MHz, CDCl<sub>3</sub>)

|                               |                                                    |                              |                      |                               |                      |
|-------------------------------|----------------------------------------------------|------------------------------|----------------------|-------------------------------|----------------------|
| <b>Acquisition Time (sec)</b> | 4.0894                                             | <b>Comment</b>               | Imported from UXNMR. | <b>Date</b>                   | 31 May 2022 15:08:20 |
| <b>File Name</b>              | C:\DOCS\OUTPUT_301\2022\05.mai\BM-2513-1.H_001001r | <b>Frequency (MHz)</b>       | 400.13               | <b>Nucleus</b>                | <sup>1</sup> H       |
| <b>Number of Transients</b>   | 4                                                  | <b>Original Points Count</b> | 32768                | <b>Points Count</b>           | 131072               |
| <b>Solvent</b>                | CHLOROFORM-D                                       | <b>Sweep Width (Hz)</b>      | 8012.82              | <b>Pulse Sequence</b>         | zg30                 |
|                               |                                                    |                              |                      | <b>Temperature (degree C)</b> | 27.000               |

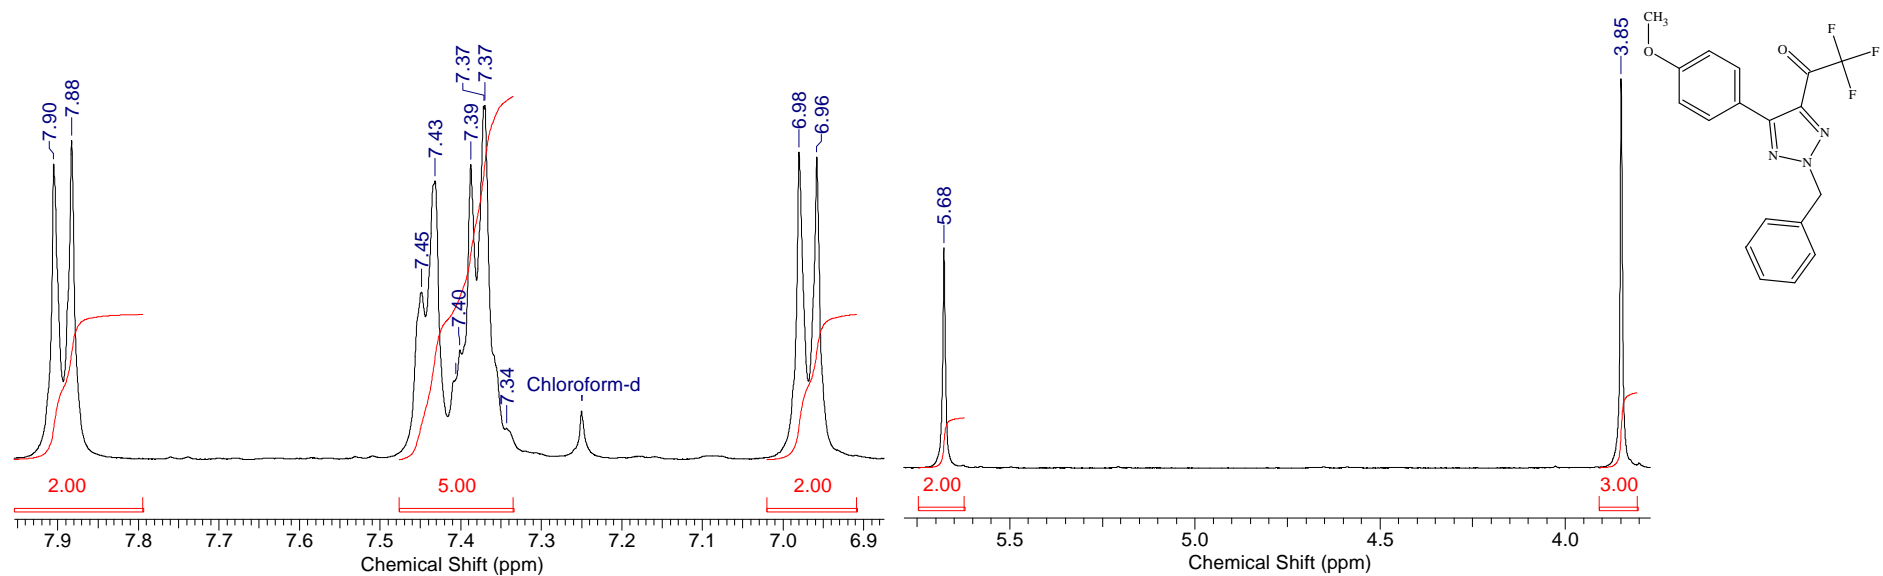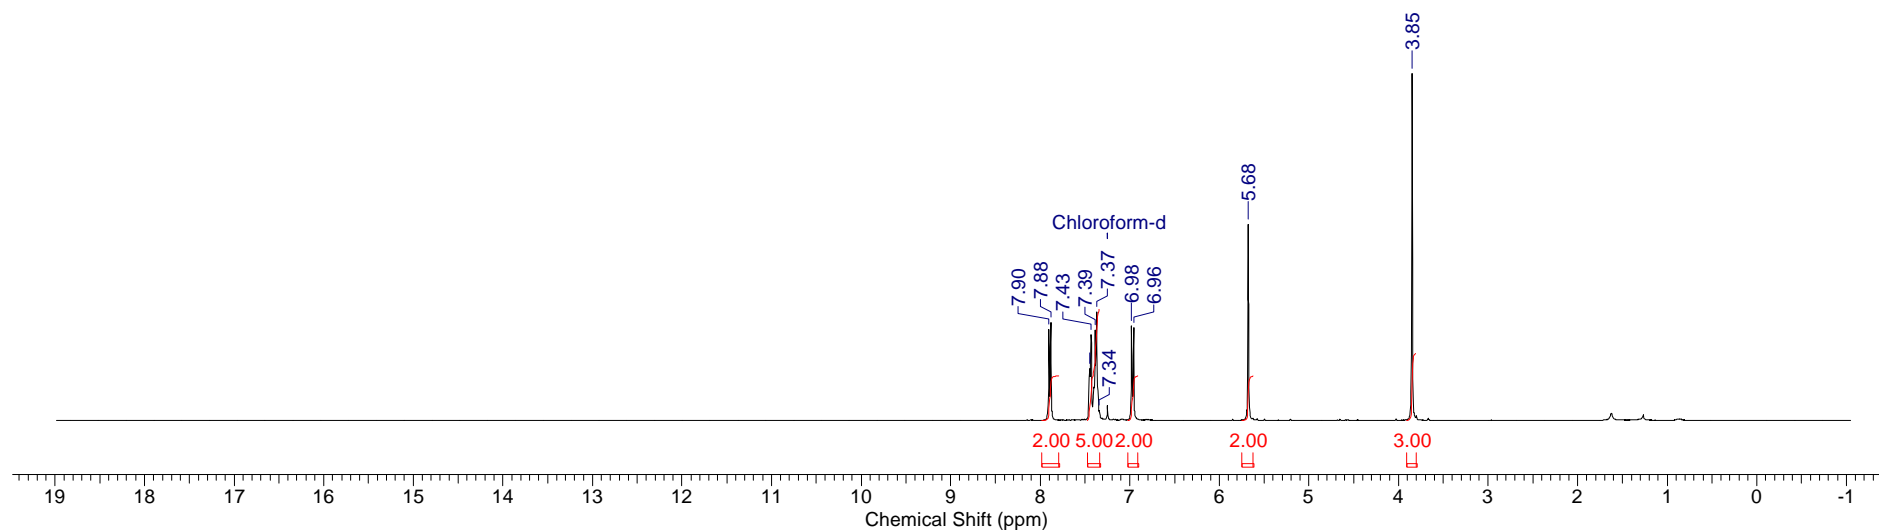

<sup>1</sup>H NMR spectrum of **3b** (400.1 MHz, CDCl<sub>3</sub>)



|                        |                                                    |                       |                      |                        |        |                      |        |
|------------------------|----------------------------------------------------|-----------------------|----------------------|------------------------|--------|----------------------|--------|
| Acquisition Time (sec) | 1.7433                                             | Comment               | Imported from UXMNR. |                        | Date   | 31 May 2022 15:21:54 |        |
| File Name              | C:\DOCS\OUTPUT_301\2022\05.mai\BM-2513-1.F_005001r | Frequency (MHz)       | 376.50               | Nucleus                | 19F    |                      |        |
| Number of Transients   | 16                                                 | Original Points Count | 131072               | Points Count           | 262144 | Pulse Sequence       | zgfgqn |
| Solvent                | CHLOROFORM-D                                       | Sweep Width (Hz)      | 75187.97             | Temperature (degree C) | 27.000 |                      |        |

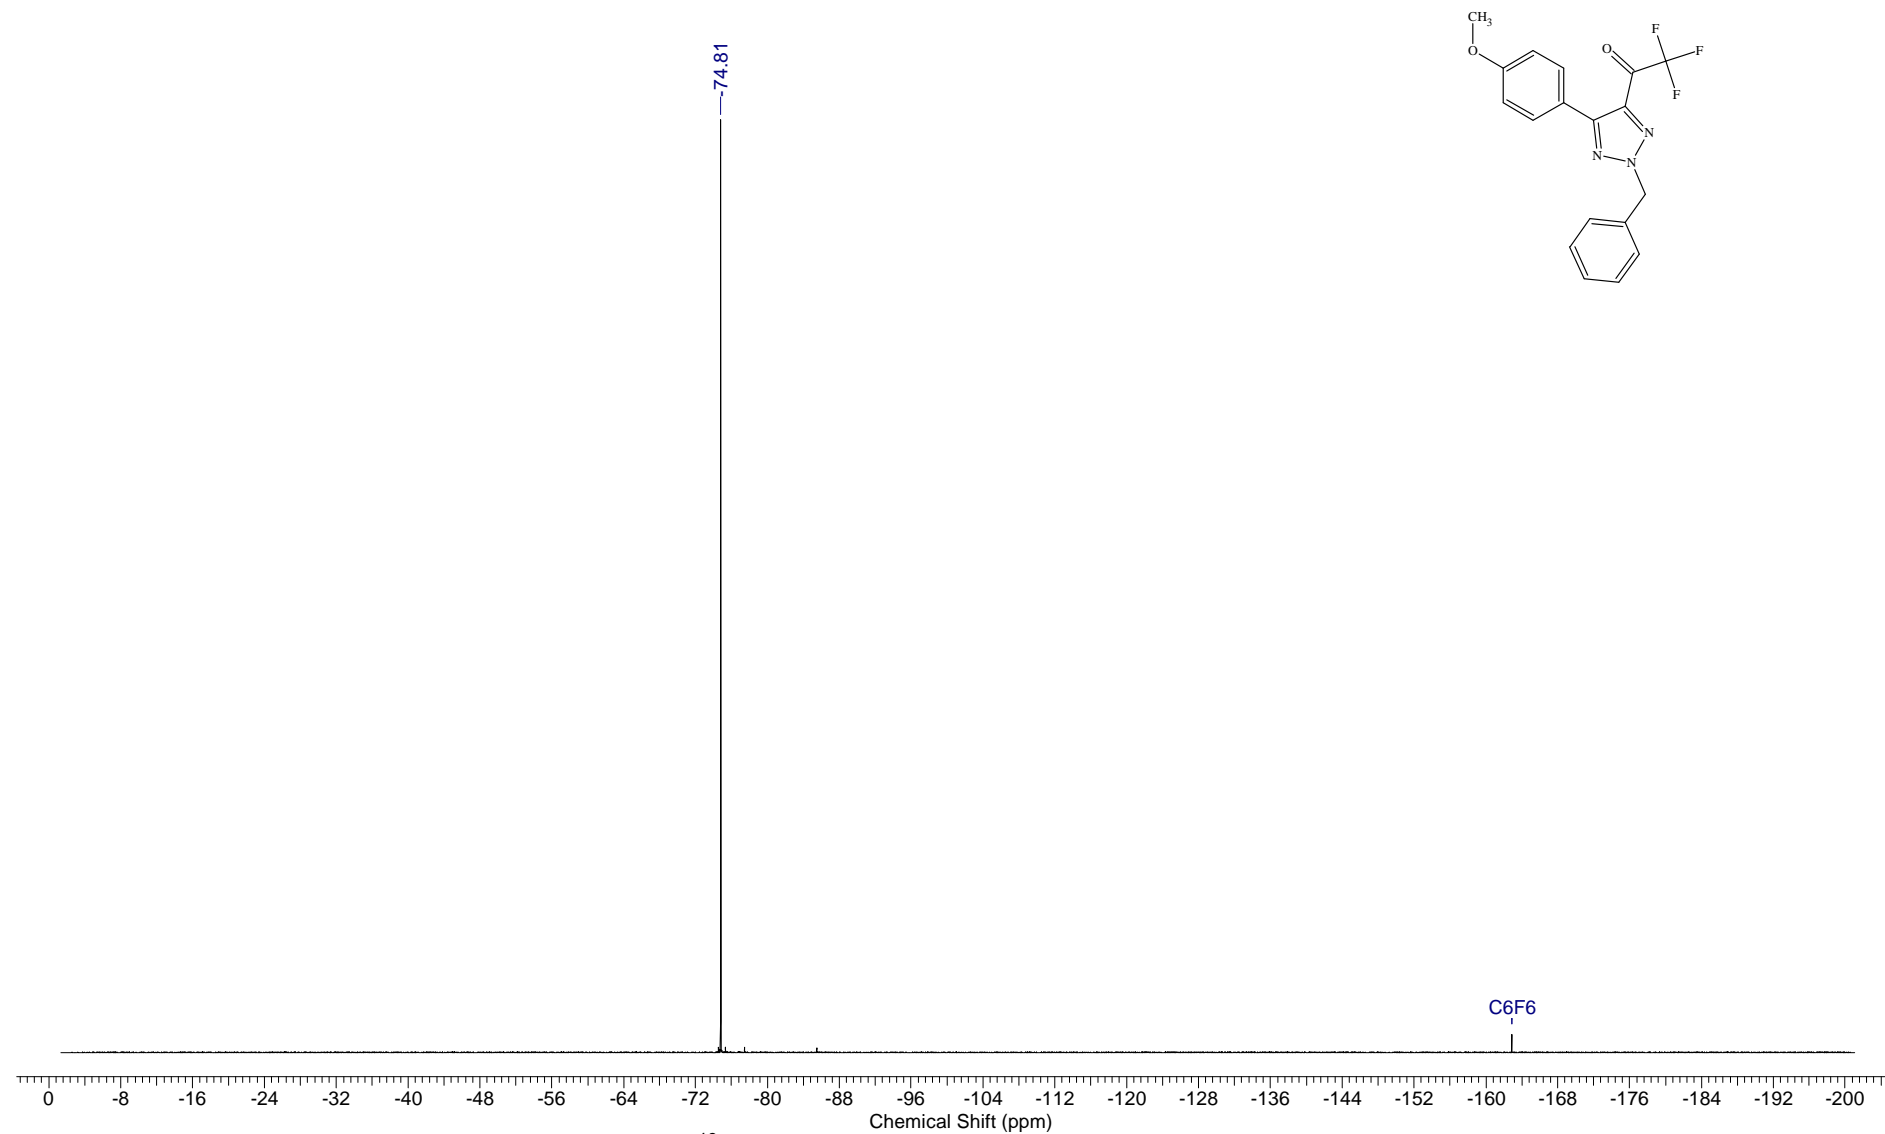

|                               |                                                    |                              |                      |                               |             |                      |
|-------------------------------|----------------------------------------------------|------------------------------|----------------------|-------------------------------|-------------|----------------------|
| <b>Acquisition Time (sec)</b> | 0.6783                                             | <b>Comment</b>               | Imported from UXMNR. |                               | <b>Date</b> | 31 May 2022 15:17:28 |
| <b>File Name</b>              | C:\DOCS\OUTPUT_301\2022\05.mai\BM-2513-1.C_002001r | <b>Frequency (MHz)</b>       | 100.61               | <b>Nucleus</b>                | 13C         |                      |
| <b>Number of Transients</b>   | 225                                                | <b>Original Points Count</b> | 16384                | <b>Points Count</b>           | 131072      |                      |
| <b>Solvent</b>                | CHLOROFORM-D                                       | <b>Sweep Width (Hz)</b>      | 24154.59             | <b>Pulse Sequence</b>         | zgpg30      |                      |
|                               |                                                    |                              |                      | <b>Temperature (degree C)</b> | 27.000      |                      |

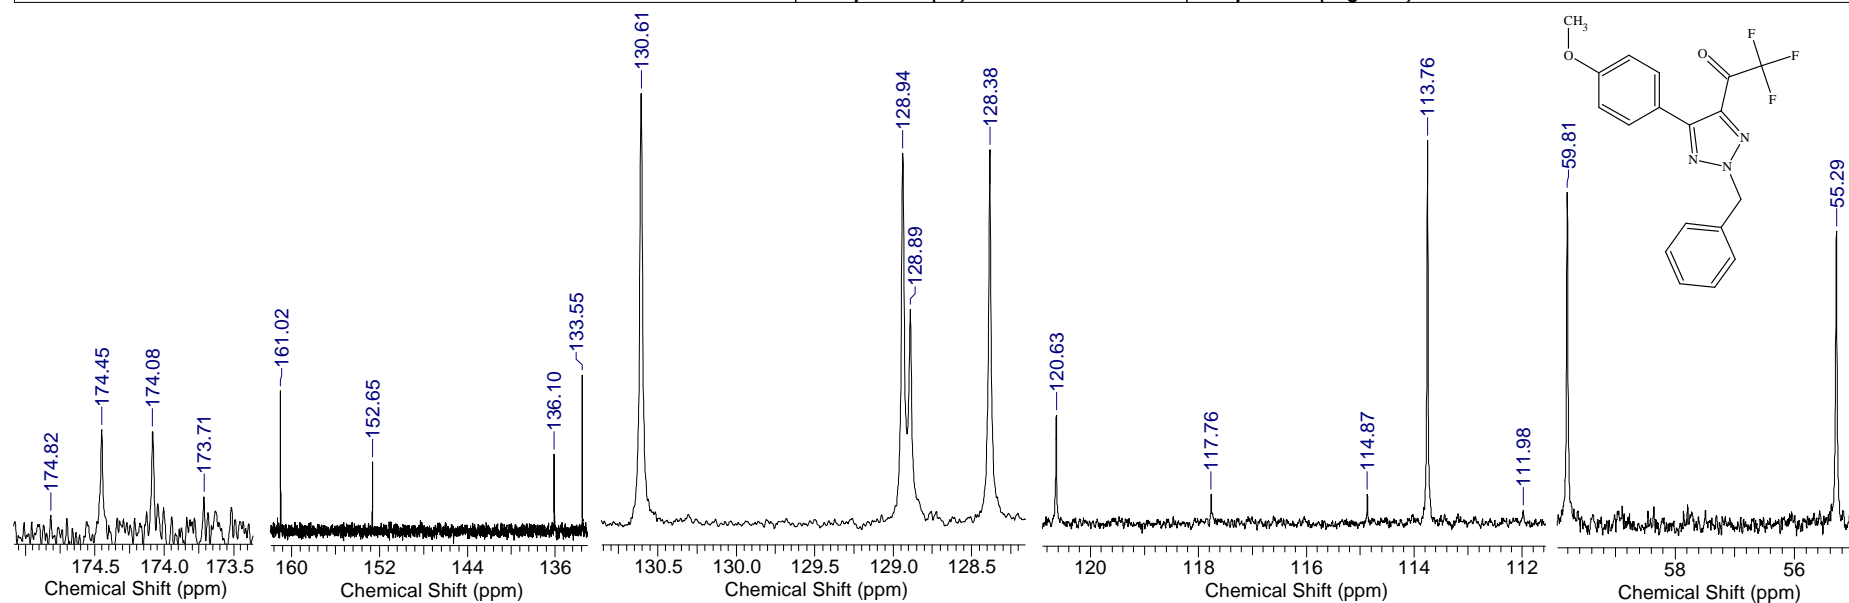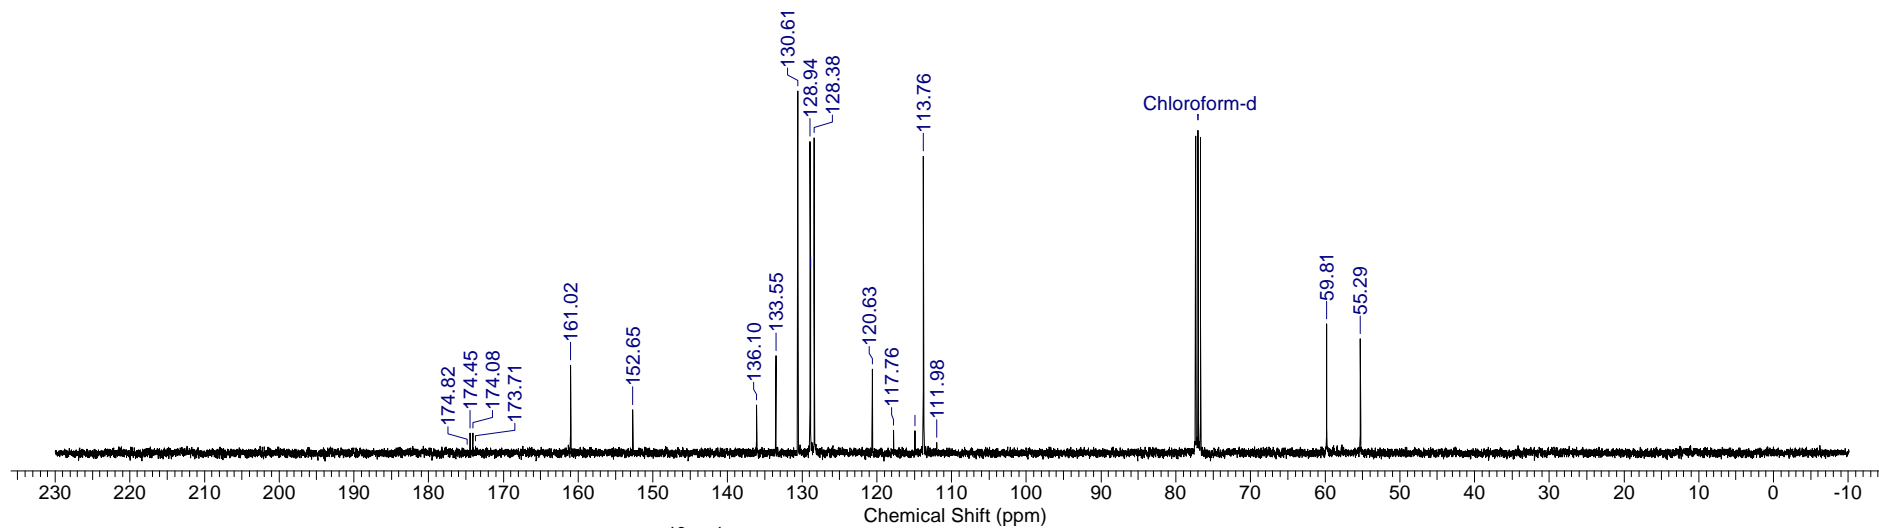 $^{13}\text{C}\{^1\text{H}\}$  NMR spectrum of **3b** (100.6 MHz,  $\text{CDCl}_3$ )

|                        |                                                    |                       |                      |                        |        |                      |      |
|------------------------|----------------------------------------------------|-----------------------|----------------------|------------------------|--------|----------------------|------|
| Acquisition Time (sec) | 4.0894                                             | Comment               | Imported from UXNMR. |                        | Date   | 31 May 2022 15:36:48 |      |
| File Name              | C:\DOCS\OUTPUT_301\2022\05.mai\BM-2513-3.H_001001r | Frequency (MHz)       | 400.13               | Nucleus                | 1H     |                      |      |
| Number of Transients   | 4                                                  | Original Points Count | 32768                | Points Count           | 131072 | Pulse Sequence       | zg30 |
| Solvent                | CHLOROFORM-D                                       | Sweep Width (Hz)      | 8012.82              | Temperature (degree C) | 27.000 |                      |      |

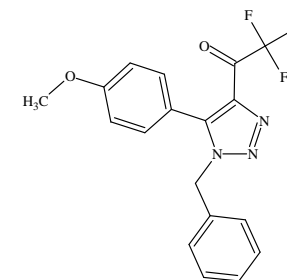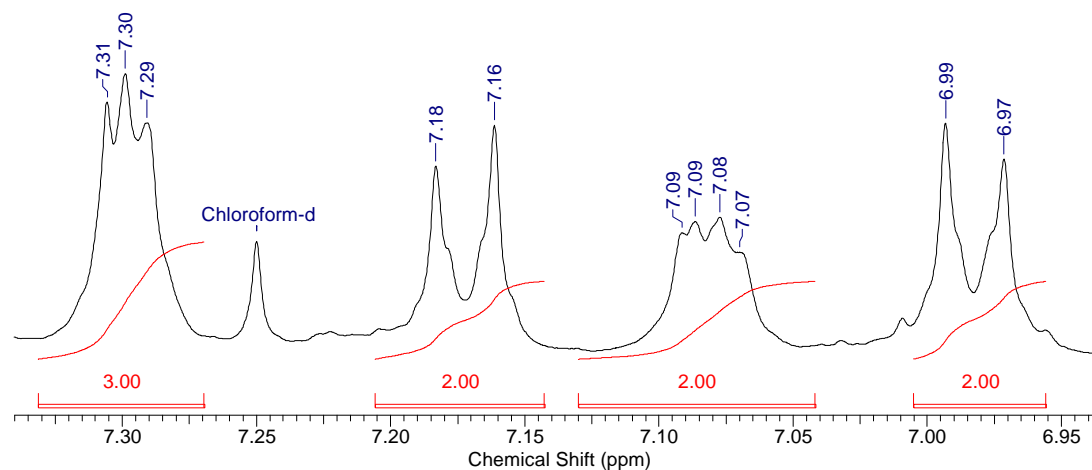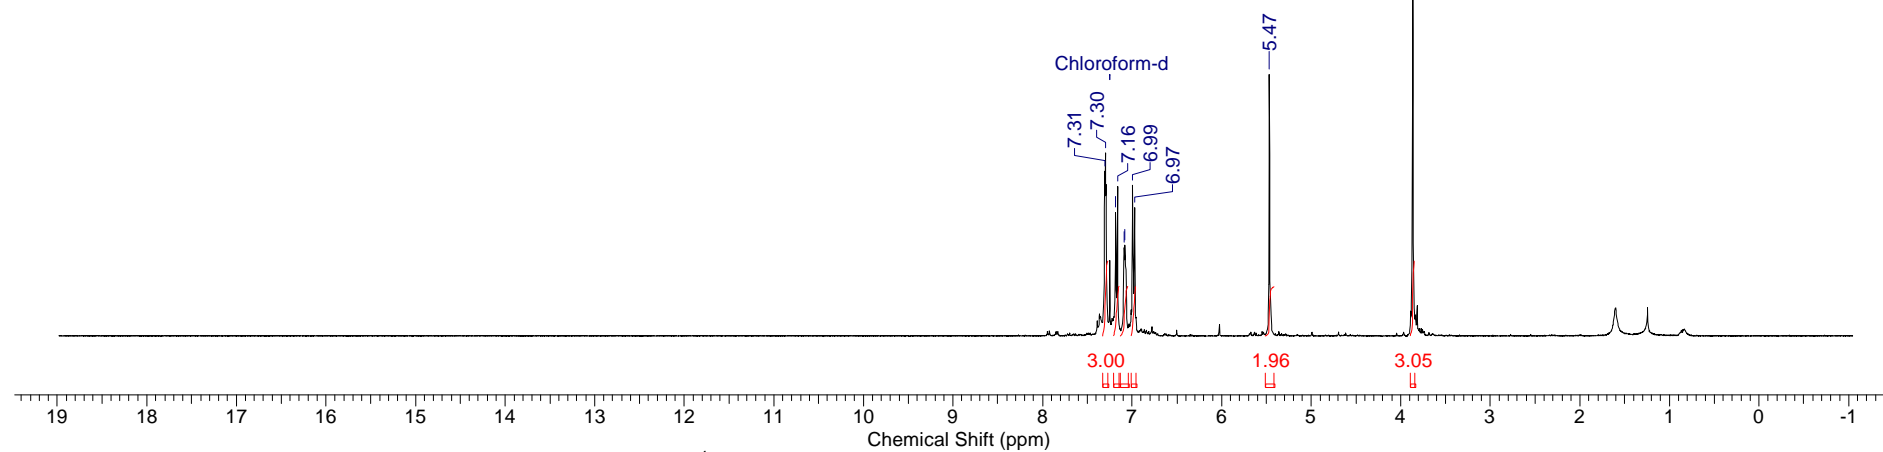

<sup>1</sup>H NMR spectrum of **4b** (400.1 MHz, CDCl<sub>3</sub>)

|                               |                                                    |                              |                      |                               |                      |
|-------------------------------|----------------------------------------------------|------------------------------|----------------------|-------------------------------|----------------------|
| <b>Acquisition Time (sec)</b> | 1.7433                                             | <b>Comment</b>               | Imported from UXNMR. | <b>Date</b>                   | 31 May 2022 15:27:58 |
| <b>File Name</b>              | C:\DOCS\OUTPUT_301\2022\05.май\BM-2513-3.F_005001r | <b>Frequency (MHz)</b>       | 376.50               | <b>Nucleus</b>                | <sup>19</sup> F      |
| <b>Number of Transients</b>   | 16                                                 | <b>Original Points Count</b> | 131072               | <b>Points Count</b>           | 262144               |
| <b>Solvent</b>                | CHLOROFORM-D                                       | <b>Sweep Width (Hz)</b>      | 75187.97             | <b>Pulse Sequence</b>         | zgfgqn               |
|                               |                                                    |                              |                      | <b>Temperature (degree C)</b> | 27.000               |

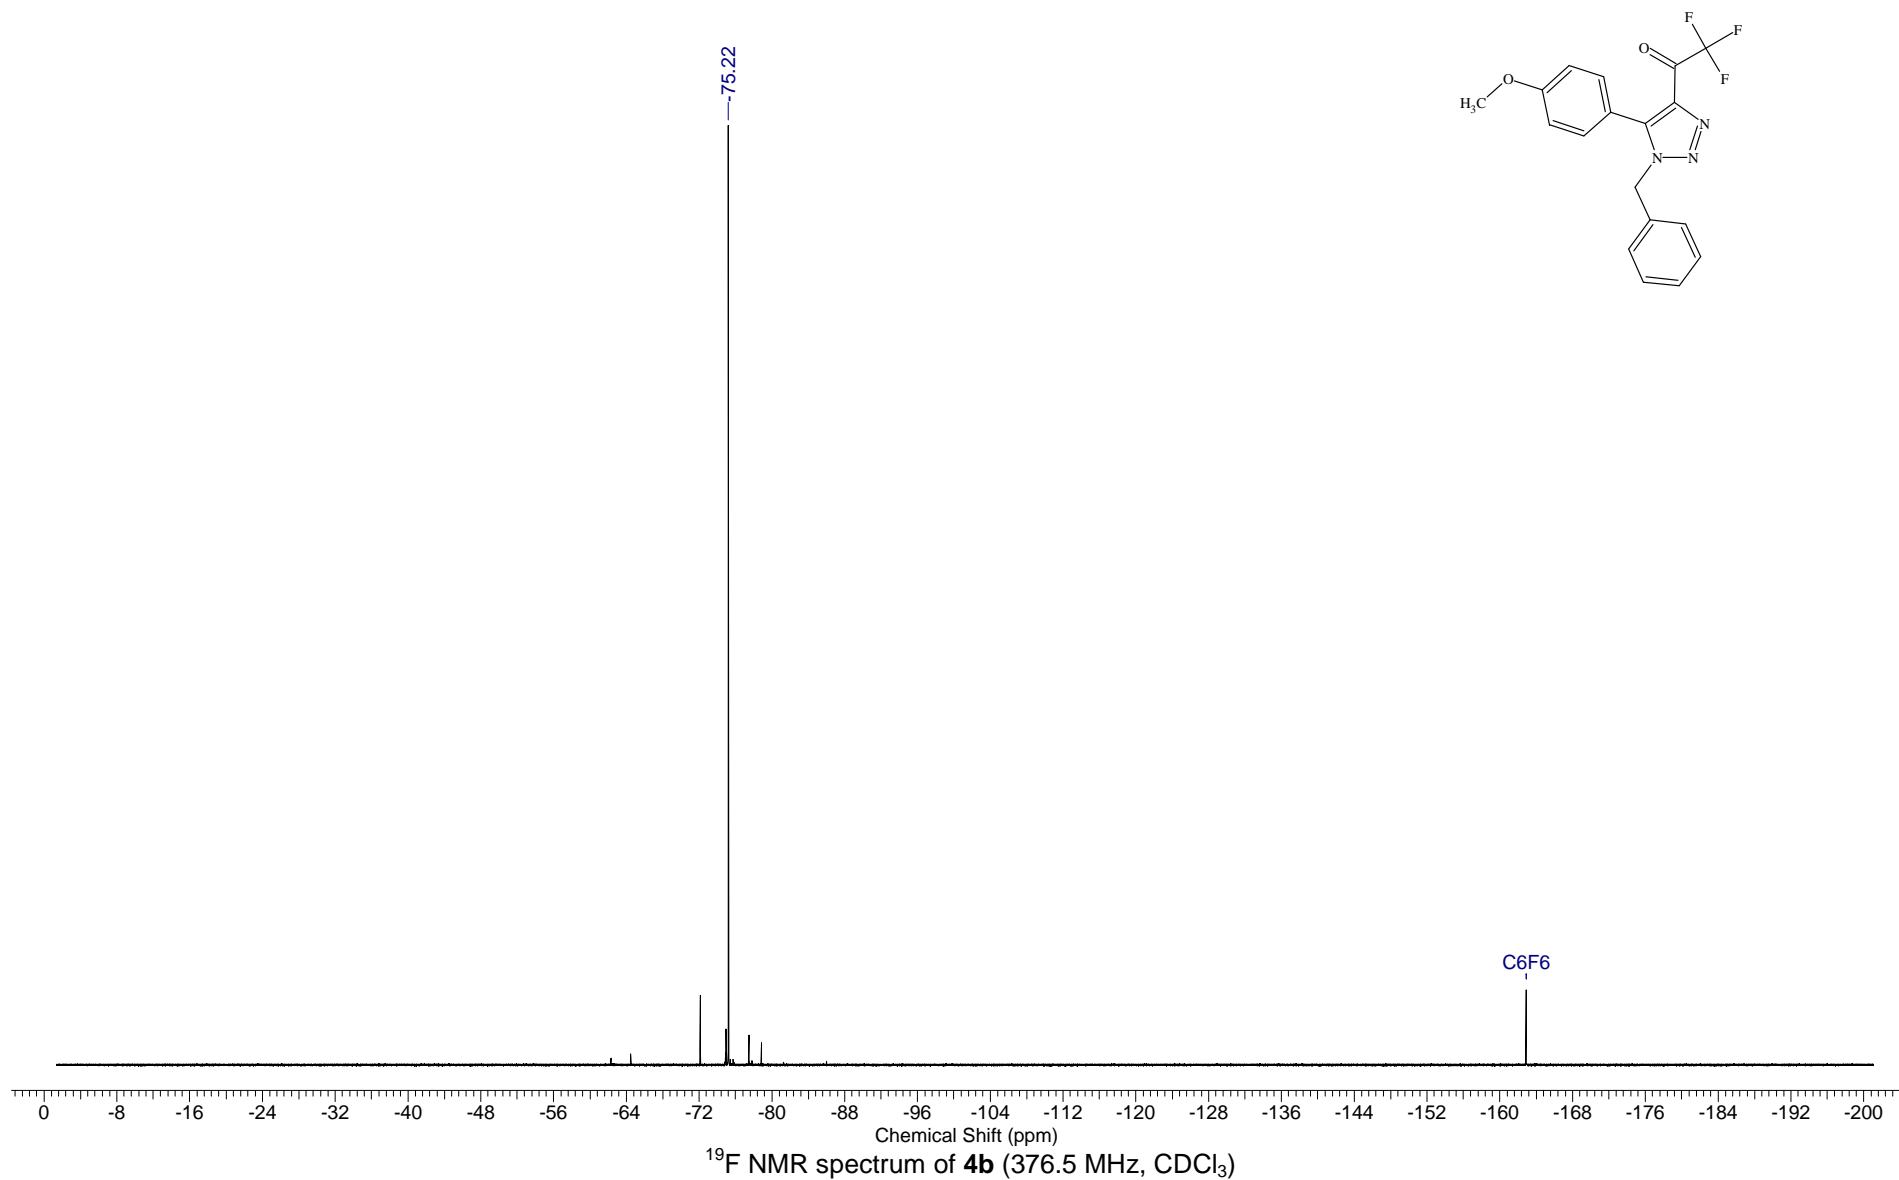

|                               |                                                    |                              |                      |                               |             |                      |
|-------------------------------|----------------------------------------------------|------------------------------|----------------------|-------------------------------|-------------|----------------------|
| <b>Acquisition Time (sec)</b> | 0.6783                                             | <b>Comment</b>               | Imported from UXNMR. |                               | <b>Date</b> | 31 May 2022 16:02:26 |
| <b>File Name</b>              | C:\DOCS\OUTPUT_301\2022\05.mai\BM-2513-3.C_002001r | <b>Frequency (MHz)</b>       | 100.61               | <b>Nucleus</b>                | 13C         |                      |
| <b>Number of Transients</b>   | 668                                                | <b>Original Points Count</b> | 16384                | <b>Points Count</b>           | 131072      |                      |
| <b>Solvent</b>                | CHLOROFORM-D                                       | <b>Sweep Width (Hz)</b>      | 24154.59             | <b>Pulse Sequence</b>         | zgpg30      |                      |
|                               |                                                    |                              |                      | <b>Temperature (degree C)</b> | 27.000      |                      |

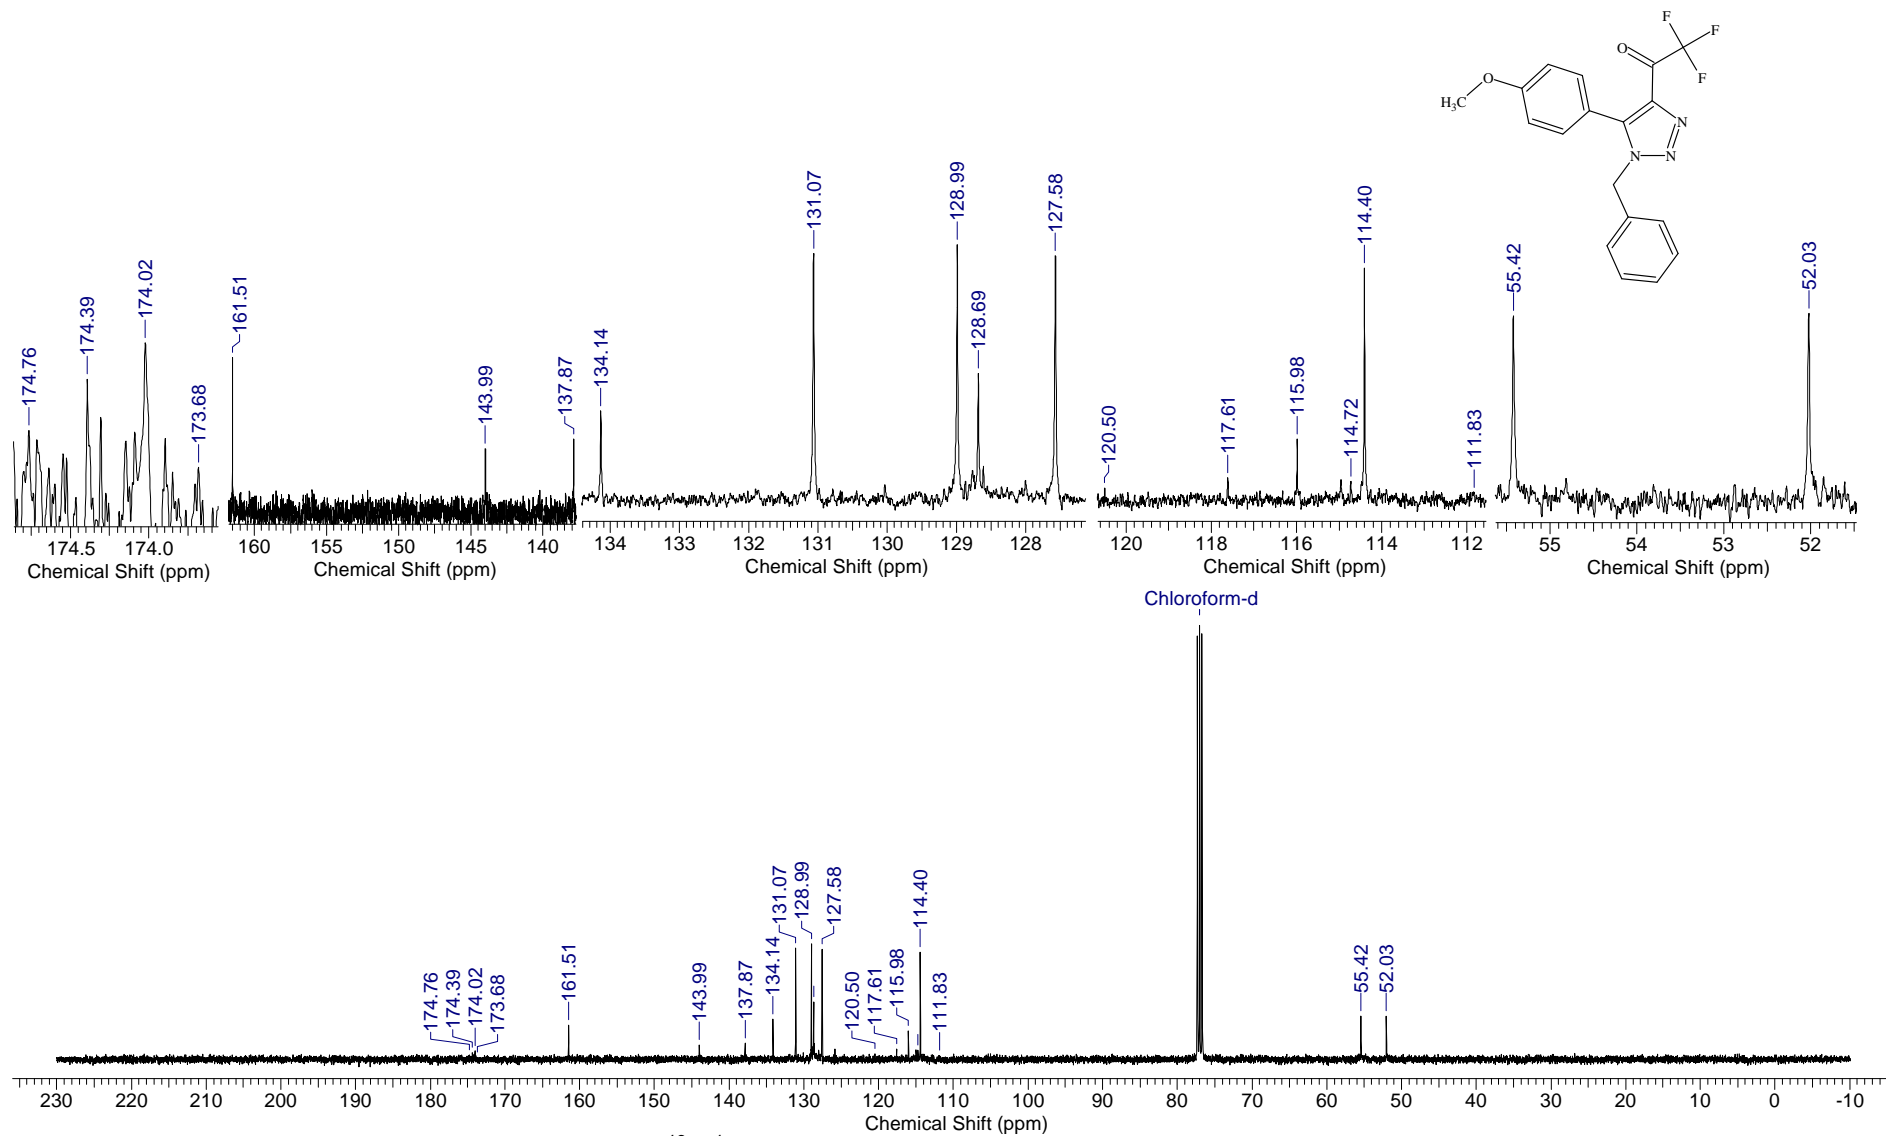<sup>13</sup>C{<sup>1</sup>H} NMR spectrum of **4b** (100.6 MHz, CDCl<sub>3</sub>)

|                        |                                                         |                      |                      |                       |                 |                        |        |
|------------------------|---------------------------------------------------------|----------------------|----------------------|-----------------------|-----------------|------------------------|--------|
| Acquisition Time (sec) | 4.0894                                                  | Comment              | Imported from UXNMR. |                       | Date            | 23 Mar 2022 17:27:40   |        |
| File Name              | C:\DOCS\OUTPUT_301\2022\03.mapr\SA-BM-2463-15.H_001001r |                      |                      |                       | Frequency (MHz) | 400.13                 |        |
| Nucleus                | 1H                                                      | Number of Transients | 4                    | Original Points Count | 32768           | Points Count           | 131072 |
| Pulse Sequence         | zg30                                                    | Solvent              | BENZENE-D6           | Sweep Width (Hz)      | 8012.82         | Temperature (degree C) | 27.000 |

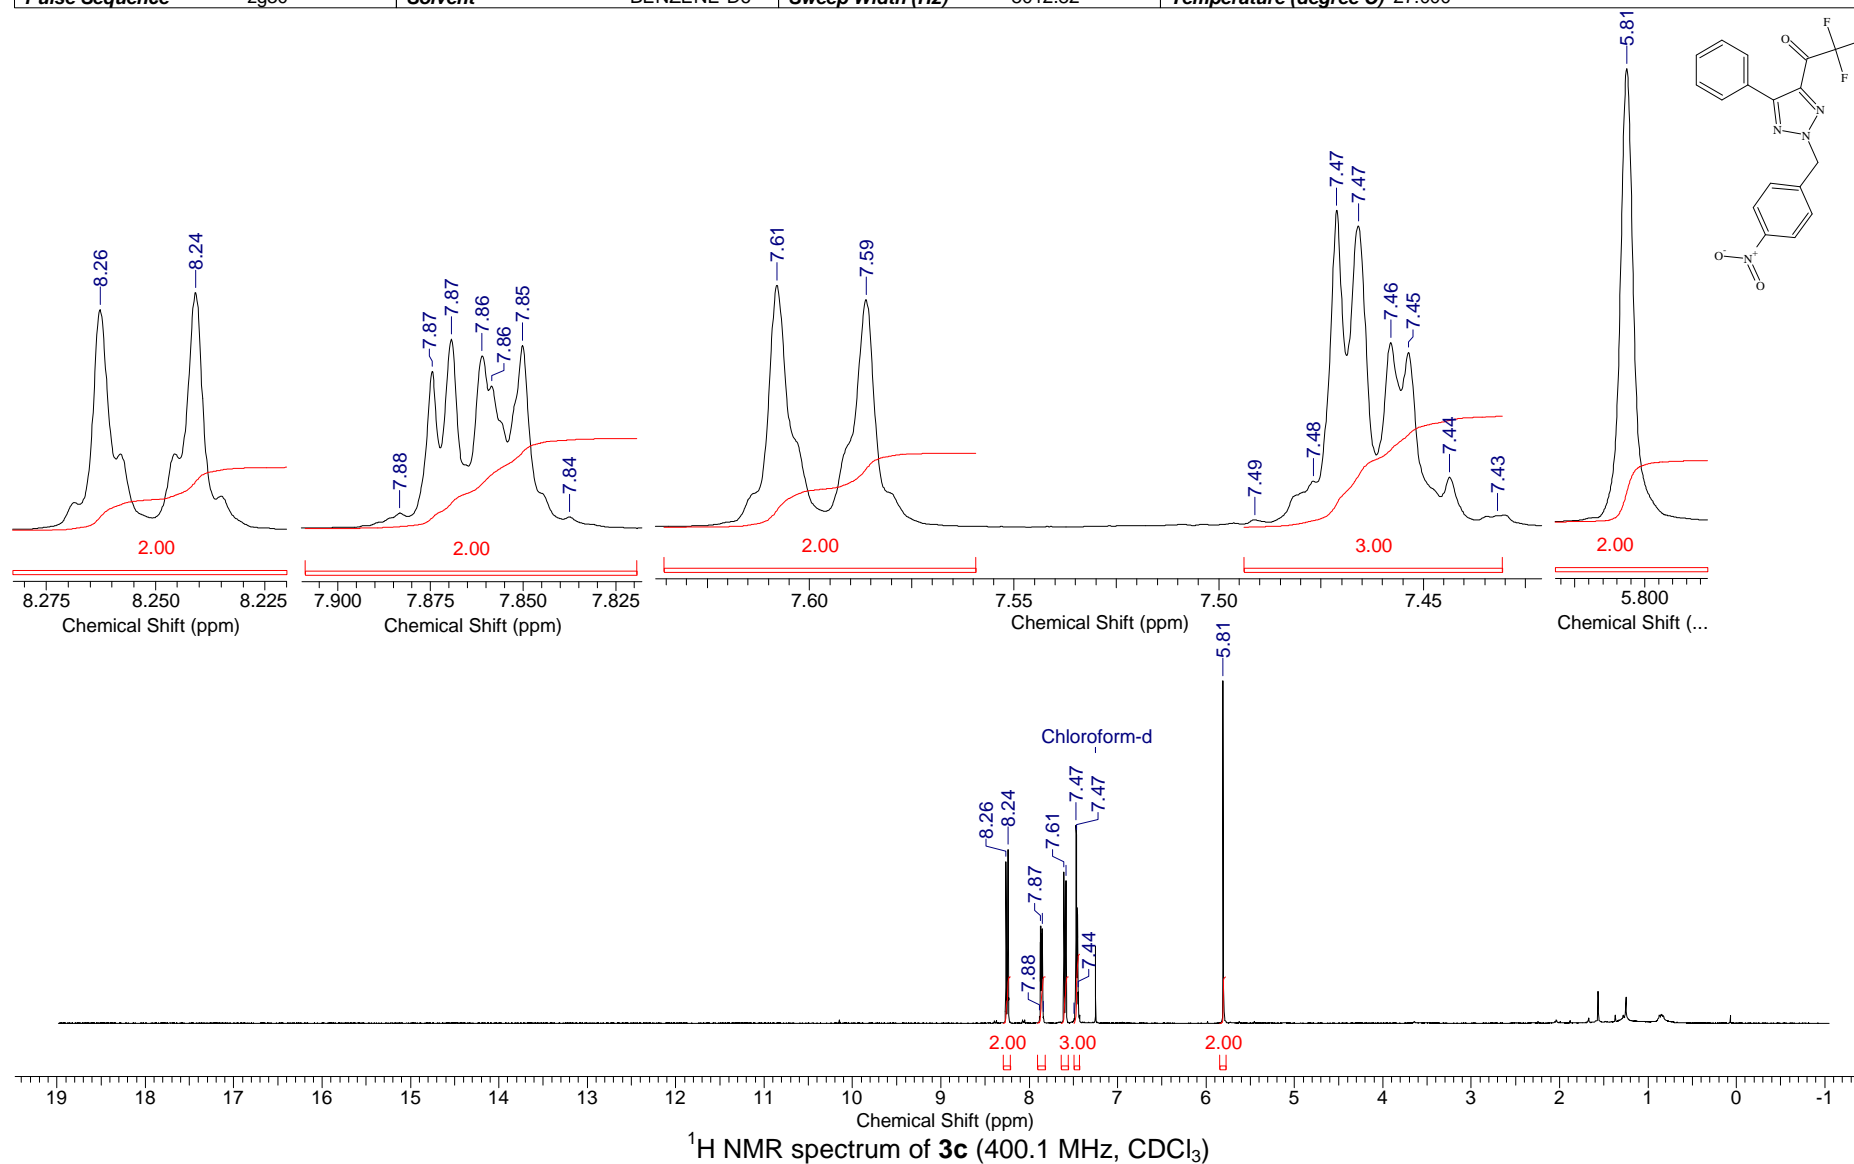

|                        |                                                         |                              |              |                       |                  |                      |        |
|------------------------|---------------------------------------------------------|------------------------------|--------------|-----------------------|------------------|----------------------|--------|
| Acquisition Time (sec) | 1.7433                                                  | Comment Imported from UXNMR. |              |                       | Date             | 23 Mar 2022 17:49:42 |        |
| File Name              | C:\DOCS\OUTPUT_301\2022\03.mapr\SA-BM-2463-15.F_005001r |                              |              |                       | Frequency (MHz)  | 376.50               |        |
| Nucleus                | 19F                                                     | Number of Transients         | 16           | Original Points Count | 131072           | Points Count         | 262144 |
| Pulse Sequence         | zgfgqn                                                  | Solvent                      | CHLOROFORM-D |                       | Sweep Width (Hz) | 75187.97             |        |
| Temperature (degree C) | 27.000                                                  |                              |              |                       |                  |                      |        |

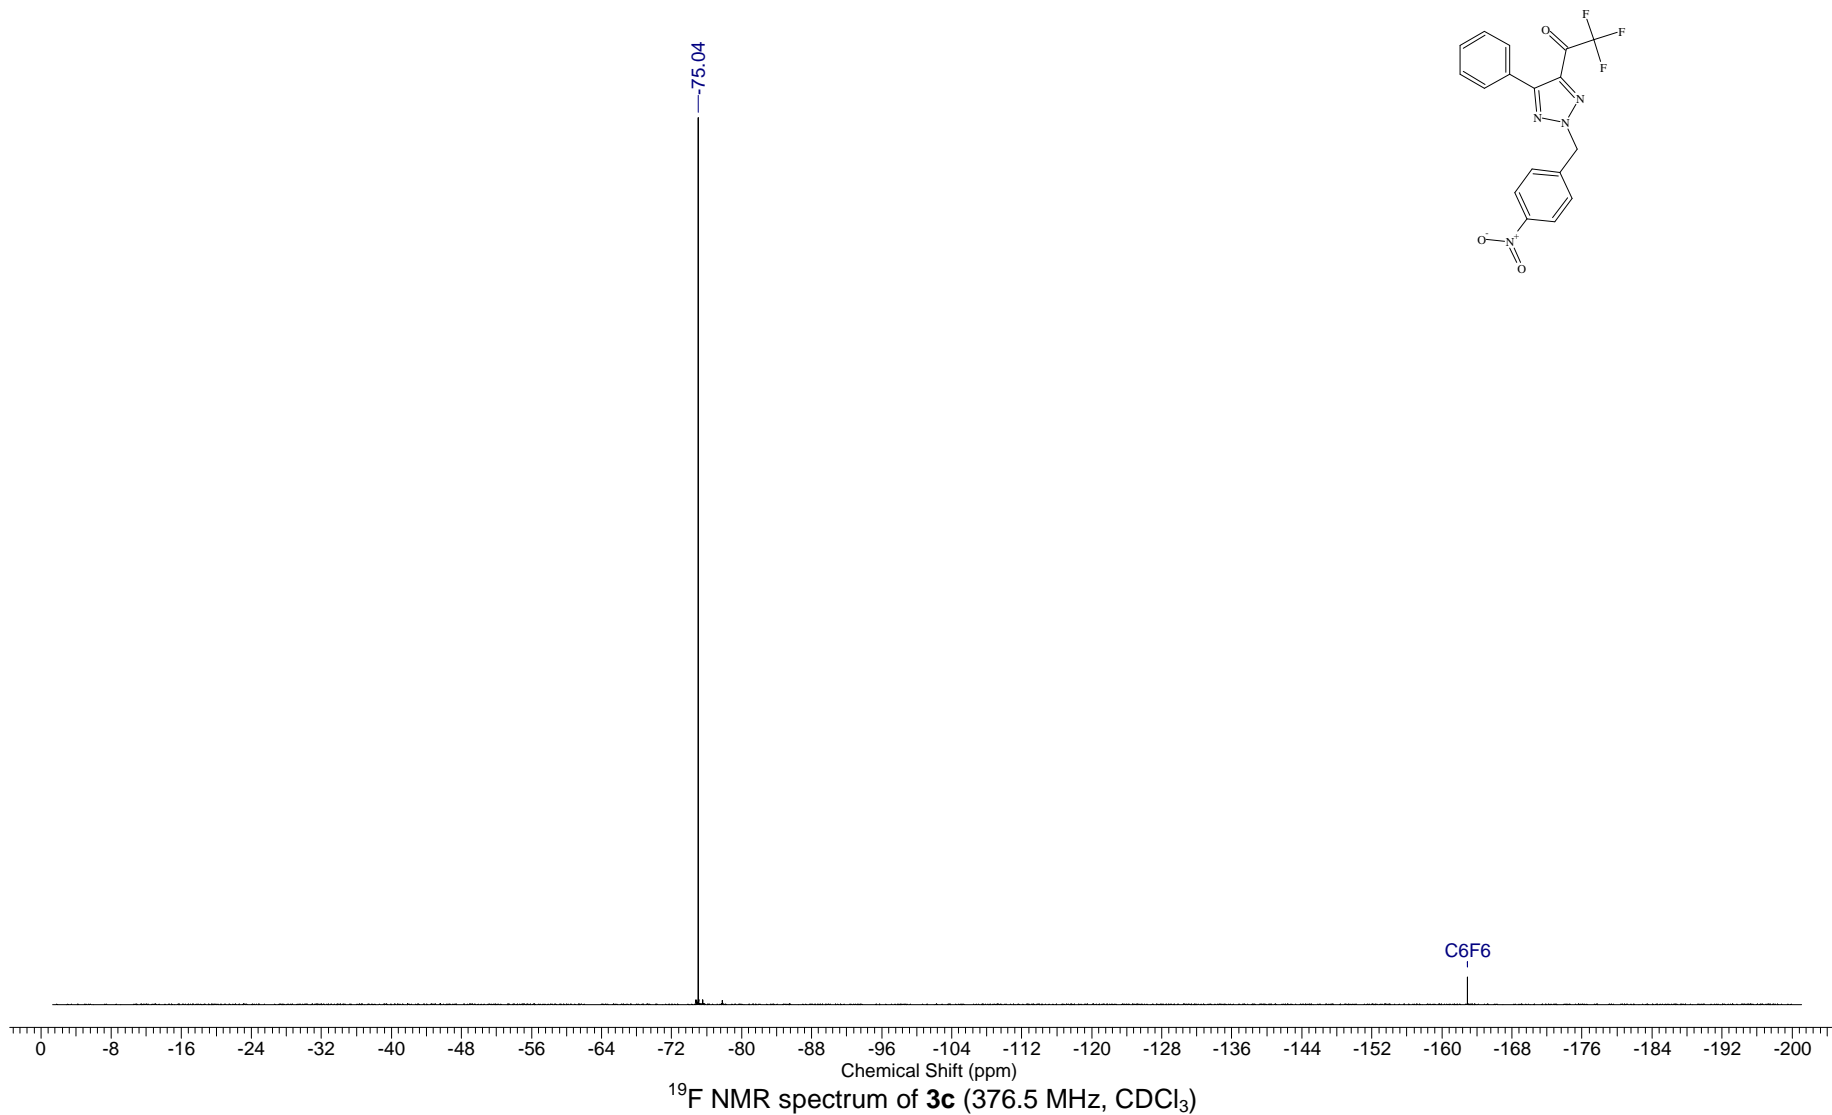

|                        |                                                         |                      |                      |                       |                 |                        |        |
|------------------------|---------------------------------------------------------|----------------------|----------------------|-----------------------|-----------------|------------------------|--------|
| Acquisition Time (sec) | 0.6783                                                  | Comment              | Imported from UXNMR. |                       | Date            | 24 Mar 2022 13:21:38   |        |
| File Name              | C:\DOCS\OUTPUT_301\2022\03.mapr\SA-BM-2463-15.C_002001r |                      |                      |                       | Frequency (MHz) | 100.61                 |        |
| Nucleus                | 13C                                                     | Number of Transients | 353                  | Original Points Count | 16384           | Points Count           | 131072 |
| Pulse Sequence         | zgpg30                                                  | Solvent              | DMSO-D6              | Sweep Width (Hz)      | 24154.59        | Temperature (degree C) | 27.000 |

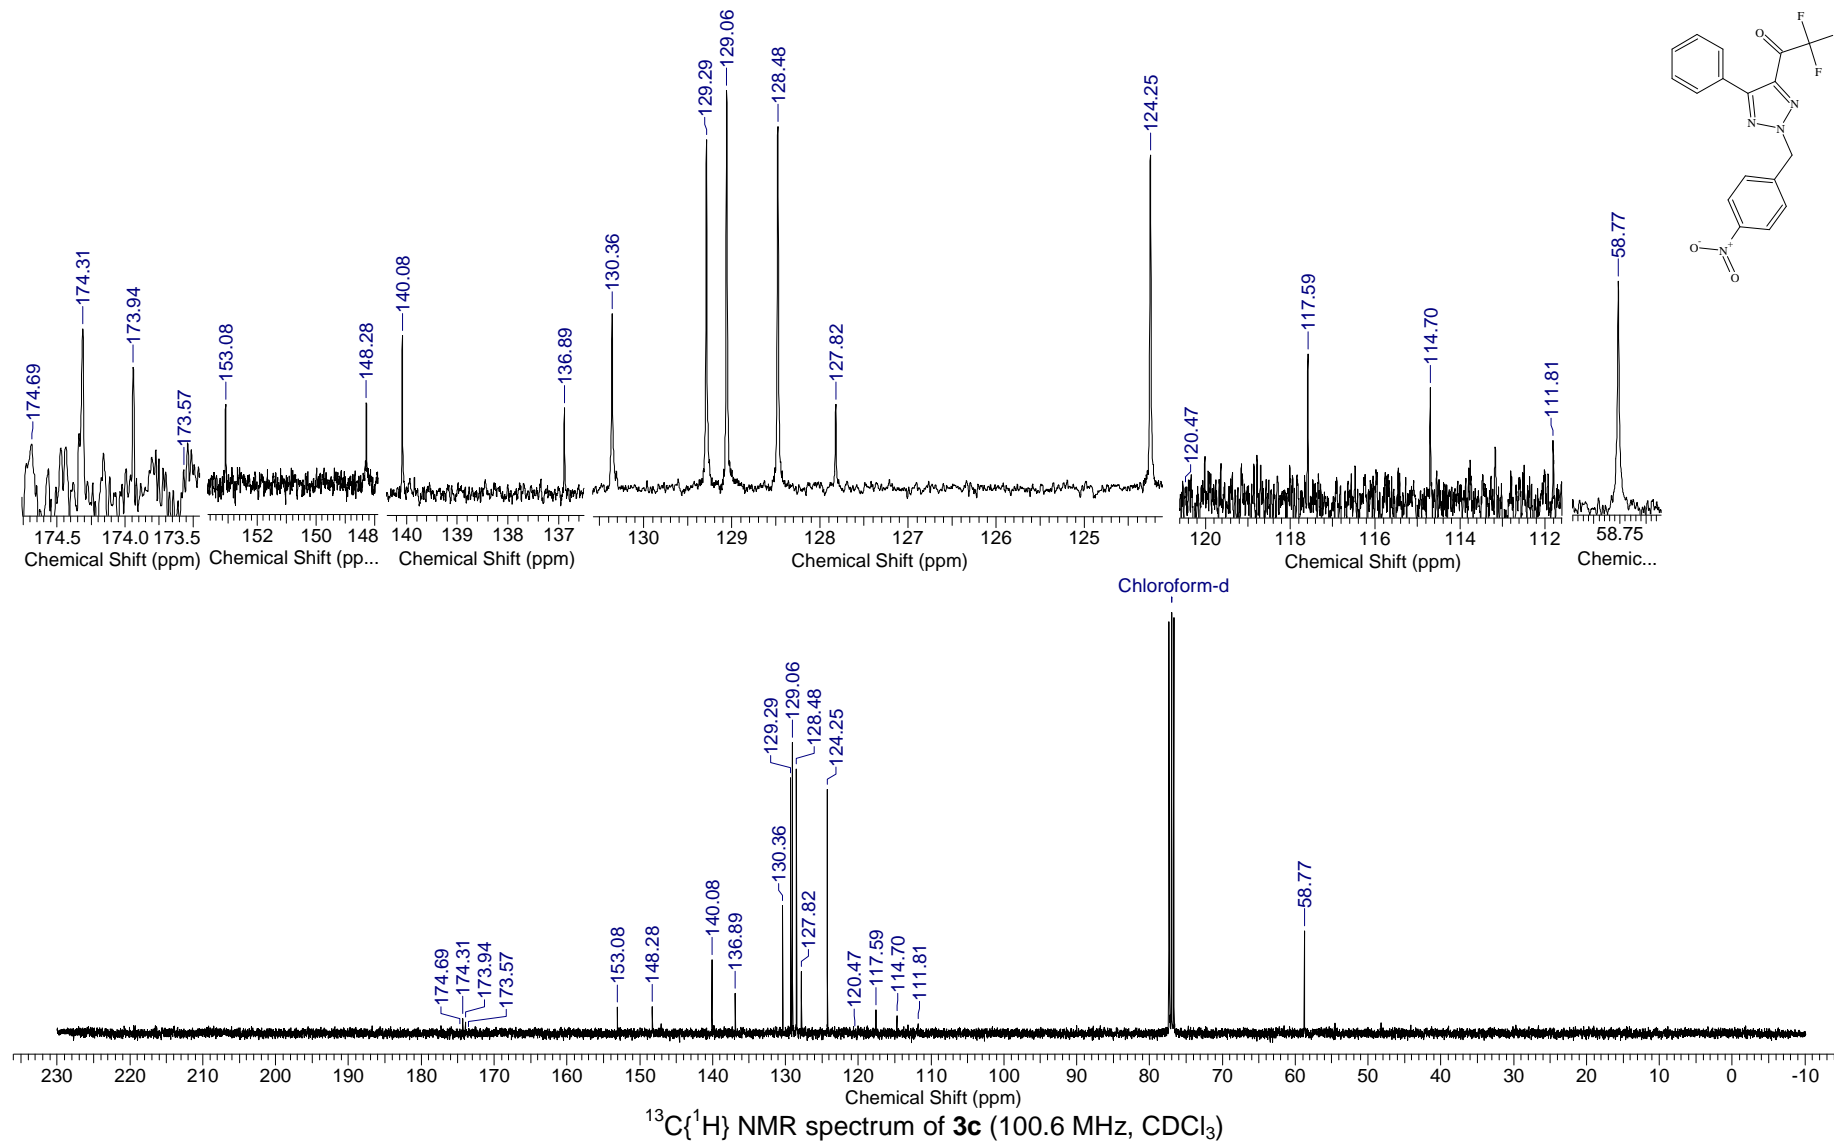



|                               |                                                      |                                     |              |                              |                      |
|-------------------------------|------------------------------------------------------|-------------------------------------|--------------|------------------------------|----------------------|
| <b>Acquisition Time (sec)</b> | 4.0894                                               | <b>Comment</b> Imported from UxNMR. |              | <b>Date</b>                  | 21 Mar 2022 15:24:14 |
| <b>File Name</b>              | C:\DOCS\OUTPUT_301\2022\03.mapr\SA-BM-2463.H_001001r |                                     |              | <b>Frequency (MHz)</b>       | 400.13               |
| <b>Nucleus</b>                | <sup>1</sup> H                                       | <b>Number of Transients</b>         | 4            | <b>Original Points Count</b> | 32768                |
| <b>Pulse Sequence</b>         | zg30                                                 | <b>Solvent</b>                      | CHLOROFORM-D | <b>Points Count</b>          | 131072               |
| <b>Temperature (degree C)</b> | 27.000                                               |                                     |              | <b>Sweep Width (Hz)</b>      | 8012.82              |

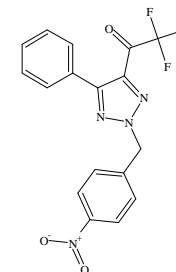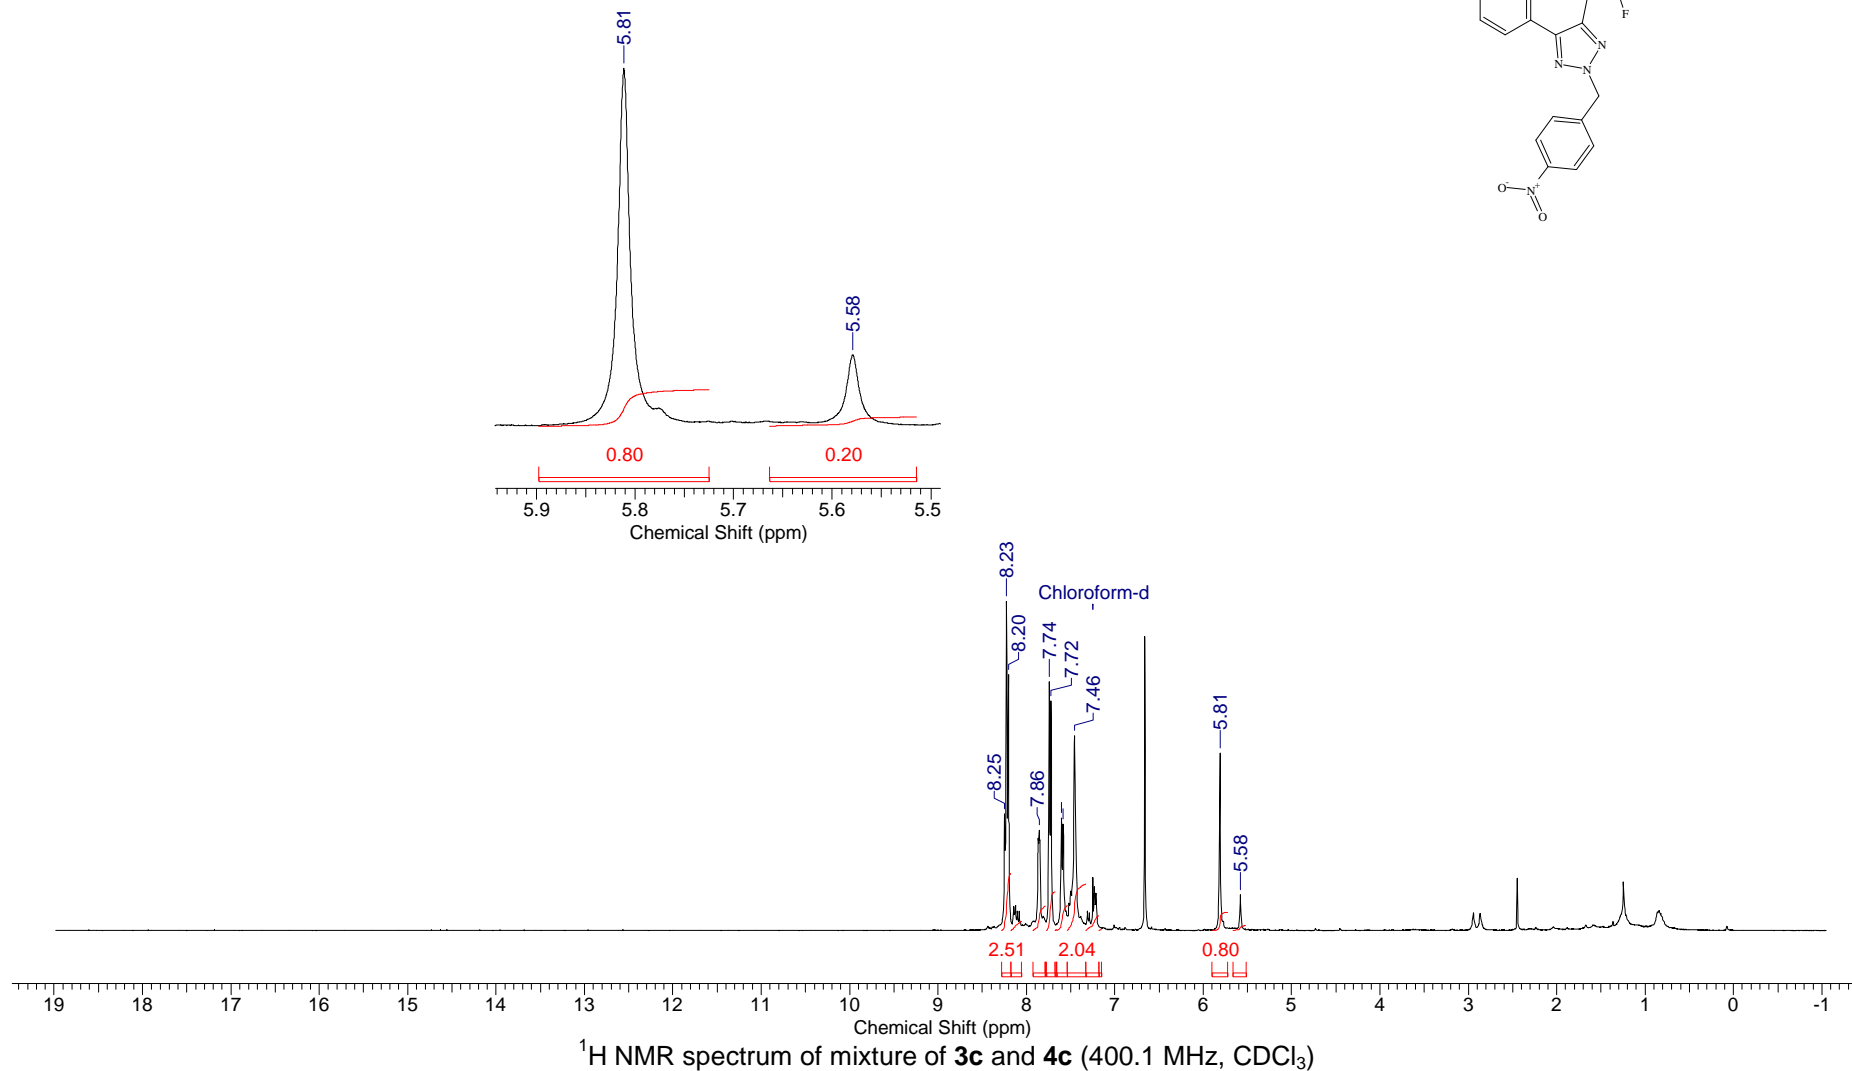

|                               |                                                        |                             |                      |                              |                      |
|-------------------------------|--------------------------------------------------------|-----------------------------|----------------------|------------------------------|----------------------|
| <b>Acquisition Time (sec)</b> | 1.7433                                                 | <b>Comment</b>              | Imported from UXNMR. | <b>Date</b>                  | 21 Mar 2022 15:35:50 |
| <b>File Name</b>              | C:\DOCS\OUTPUT_301\2022\03.mapr\1SZA-BM-2463.F_005001r | <b>Frequency (MHz)</b>      | 376.50               | <b>Points Count</b>          | 262144               |
| <b>Nucleus</b>                | <sup>19</sup> F                                        | <b>Number of Transients</b> | 16                   | <b>Original Points Count</b> | 131072               |
| <b>Pulse Sequence</b>         | zgfgqn                                                 | <b>Solvent</b>              | CHLOROFORM-D         | <b>Sweep Width (Hz)</b>      | 75187.97             |
| <b>Temperature (degree C)</b> | 27.000                                                 |                             |                      |                              |                      |

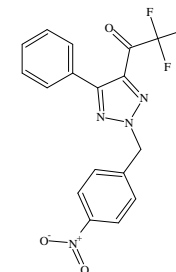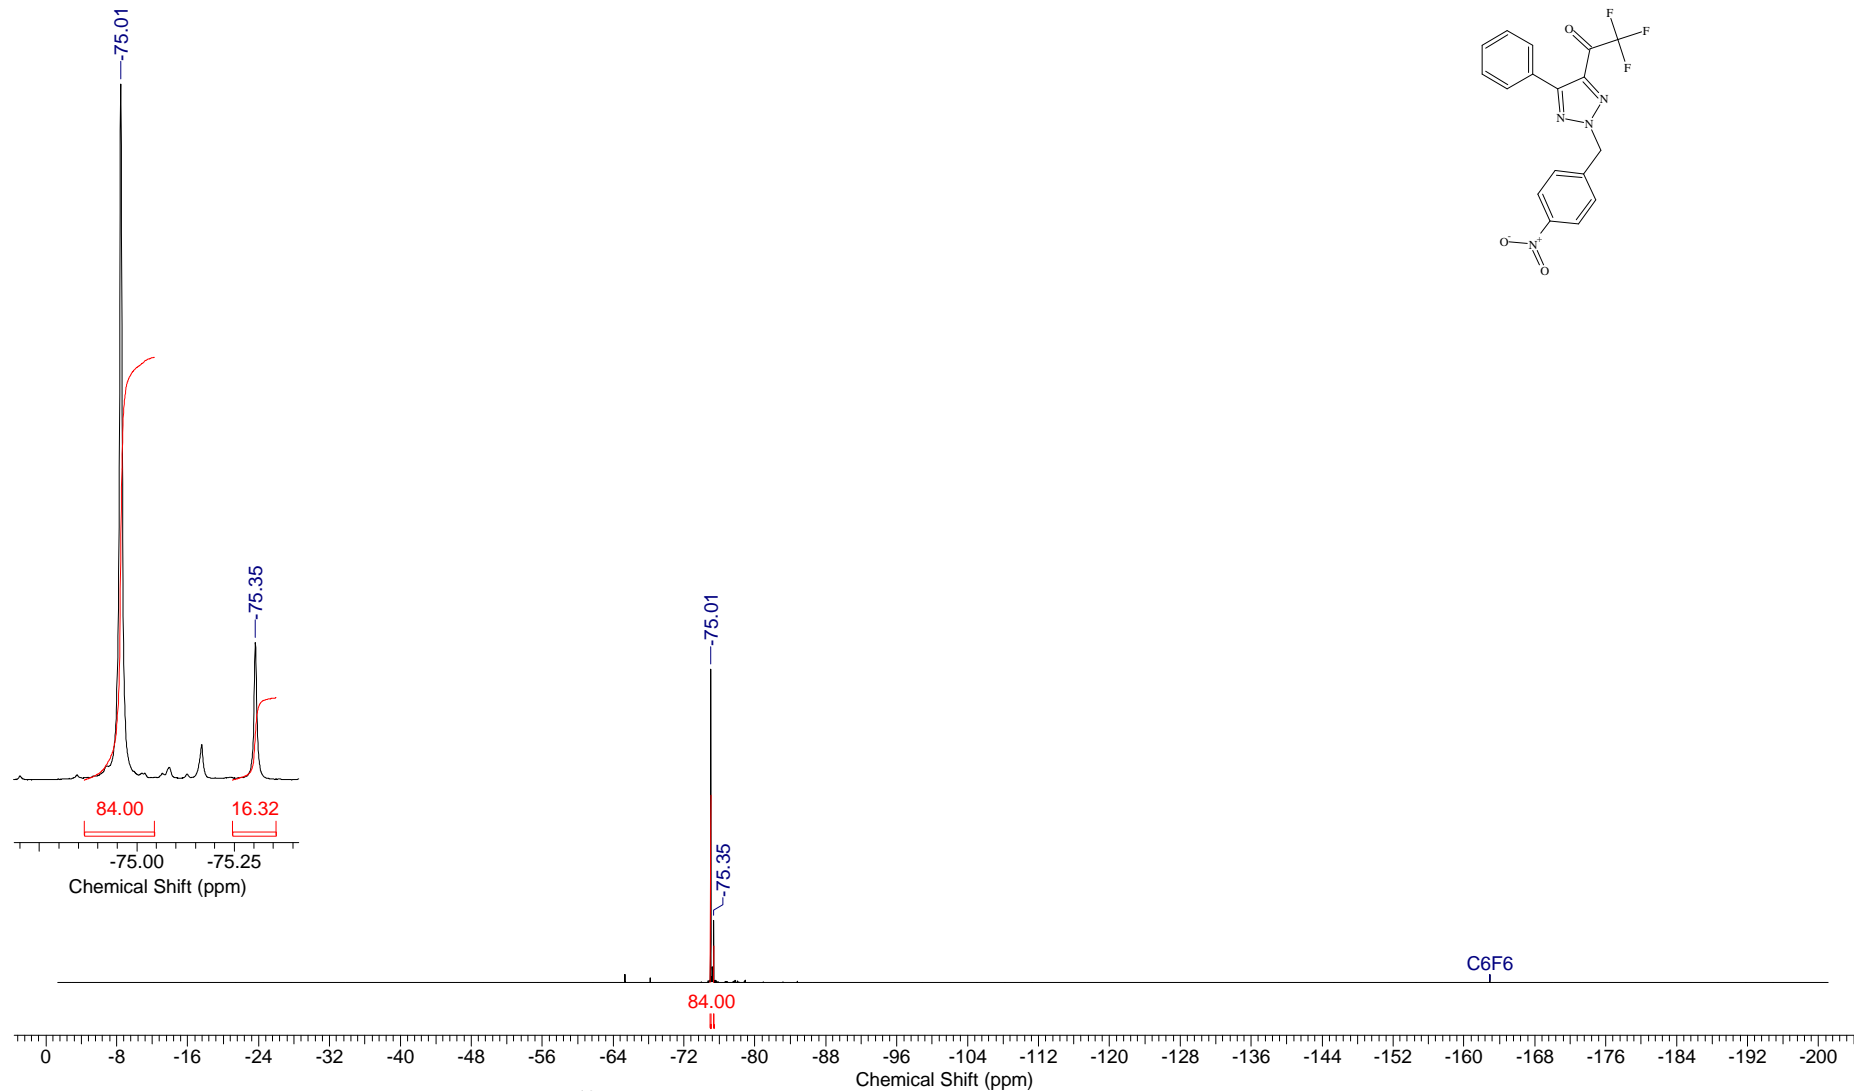

|                               |                                                       |                             |                      |                              |                      |
|-------------------------------|-------------------------------------------------------|-----------------------------|----------------------|------------------------------|----------------------|
| <b>Acquisition Time (sec)</b> | 4.0894                                                | <b>Comment</b>              | Imported from UXMNR. | <b>Date</b>                  | 07 Apr 2022 11:55:52 |
| <b>File Name</b>              | C:\DOCS\OUTPUT_301\2022\04.апрель\BM-2477-1.H_001001r | <b>Frequency (MHz)</b>      | 400.13               | <b>Points Count</b>          | 131072               |
| <b>Nucleus</b>                | <sup>1</sup> H                                        | <b>Number of Transients</b> | 4                    | <b>Original Points Count</b> | 32768                |
| <b>Pulse Sequence</b>         | zg30                                                  | <b>Solvent</b>              | CHLOROFORM-D         | <b>Sweep Width (Hz)</b>      | 8012.82              |
| <b>Temperature (degree C)</b> | 27.000                                                |                             |                      |                              |                      |

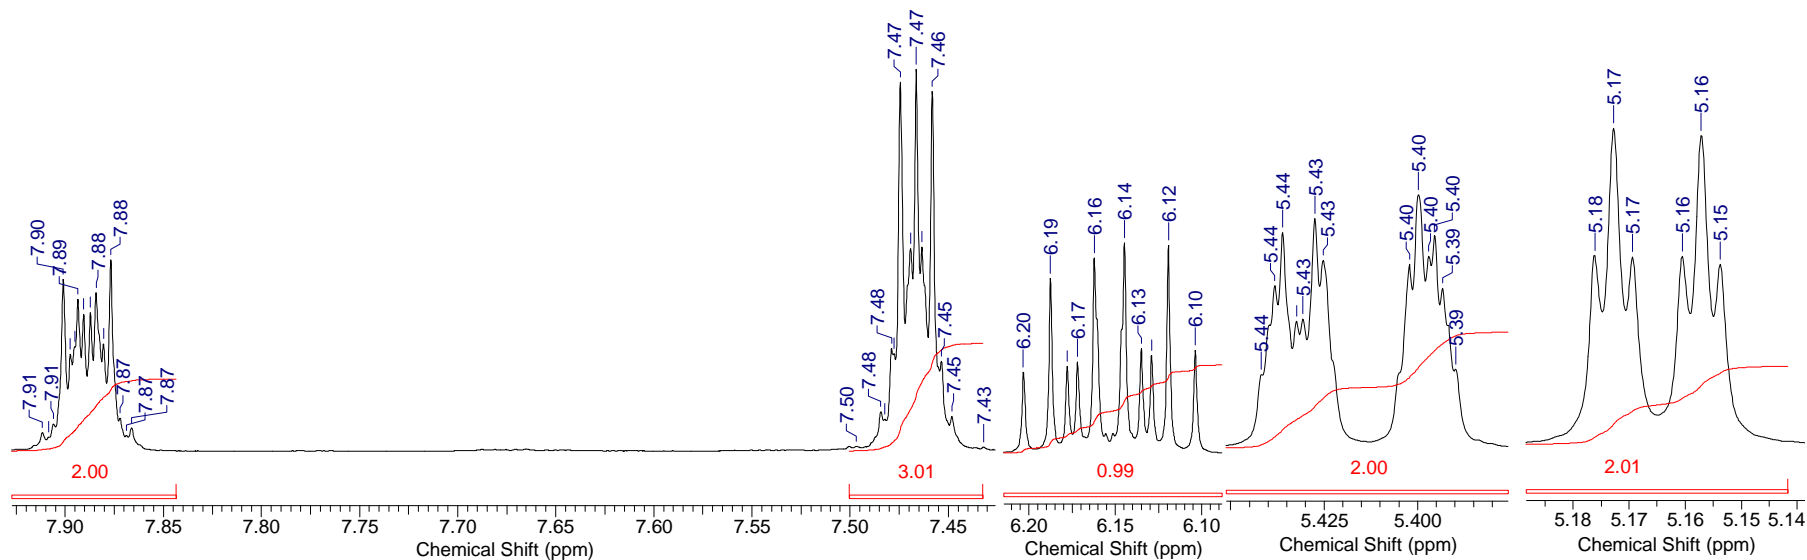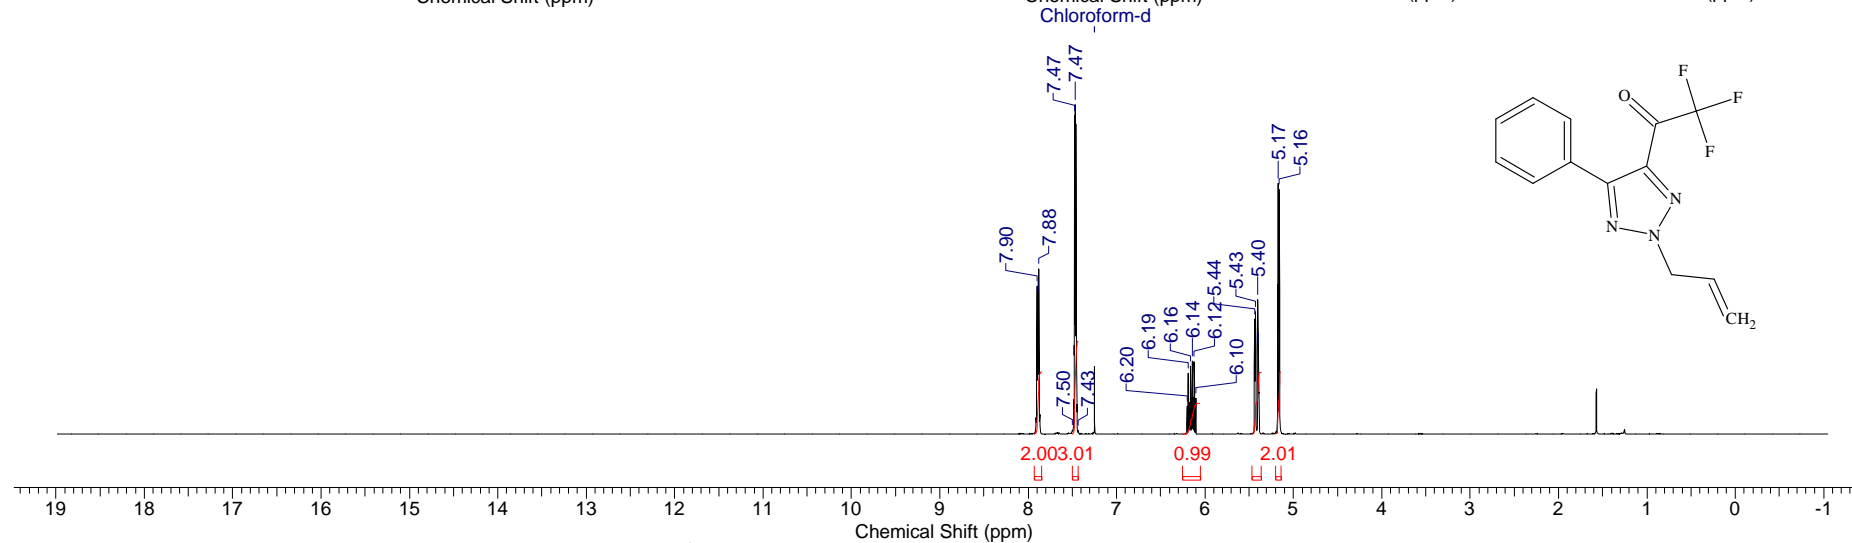<sup>1</sup>H NMR spectrum of **3d** (400.1 MHz, CDCl<sub>3</sub>)

|                               |                                                       |                             |                      |                              |                      |
|-------------------------------|-------------------------------------------------------|-----------------------------|----------------------|------------------------------|----------------------|
| <b>Acquisition Time (sec)</b> | 1.7433                                                | <b>Comment</b>              | Imported from UXNMR. | <b>Date</b>                  | 07 Apr 2022 12:29:52 |
| <b>File Name</b>              | C:\DOCS\OUTPUT_301\2022\04.апрель\BM-2477-1.F_005001r | <b>Frequency (MHz)</b>      | 376.50               |                              |                      |
| <b>Nucleus</b>                | <sup>19</sup> F                                       | <b>Number of Transients</b> | 16                   | <b>Original Points Count</b> | 131072               |
| <b>Pulse Sequence</b>         | zgfgqn                                                | <b>Points Count</b>         | 262144               | <b>Sweep Width (Hz)</b>      | 75187.97             |
| <b>Temperature (degree C)</b> | 27.000                                                | <b>Solvent</b>              | CHLOROFORM-D         |                              |                      |

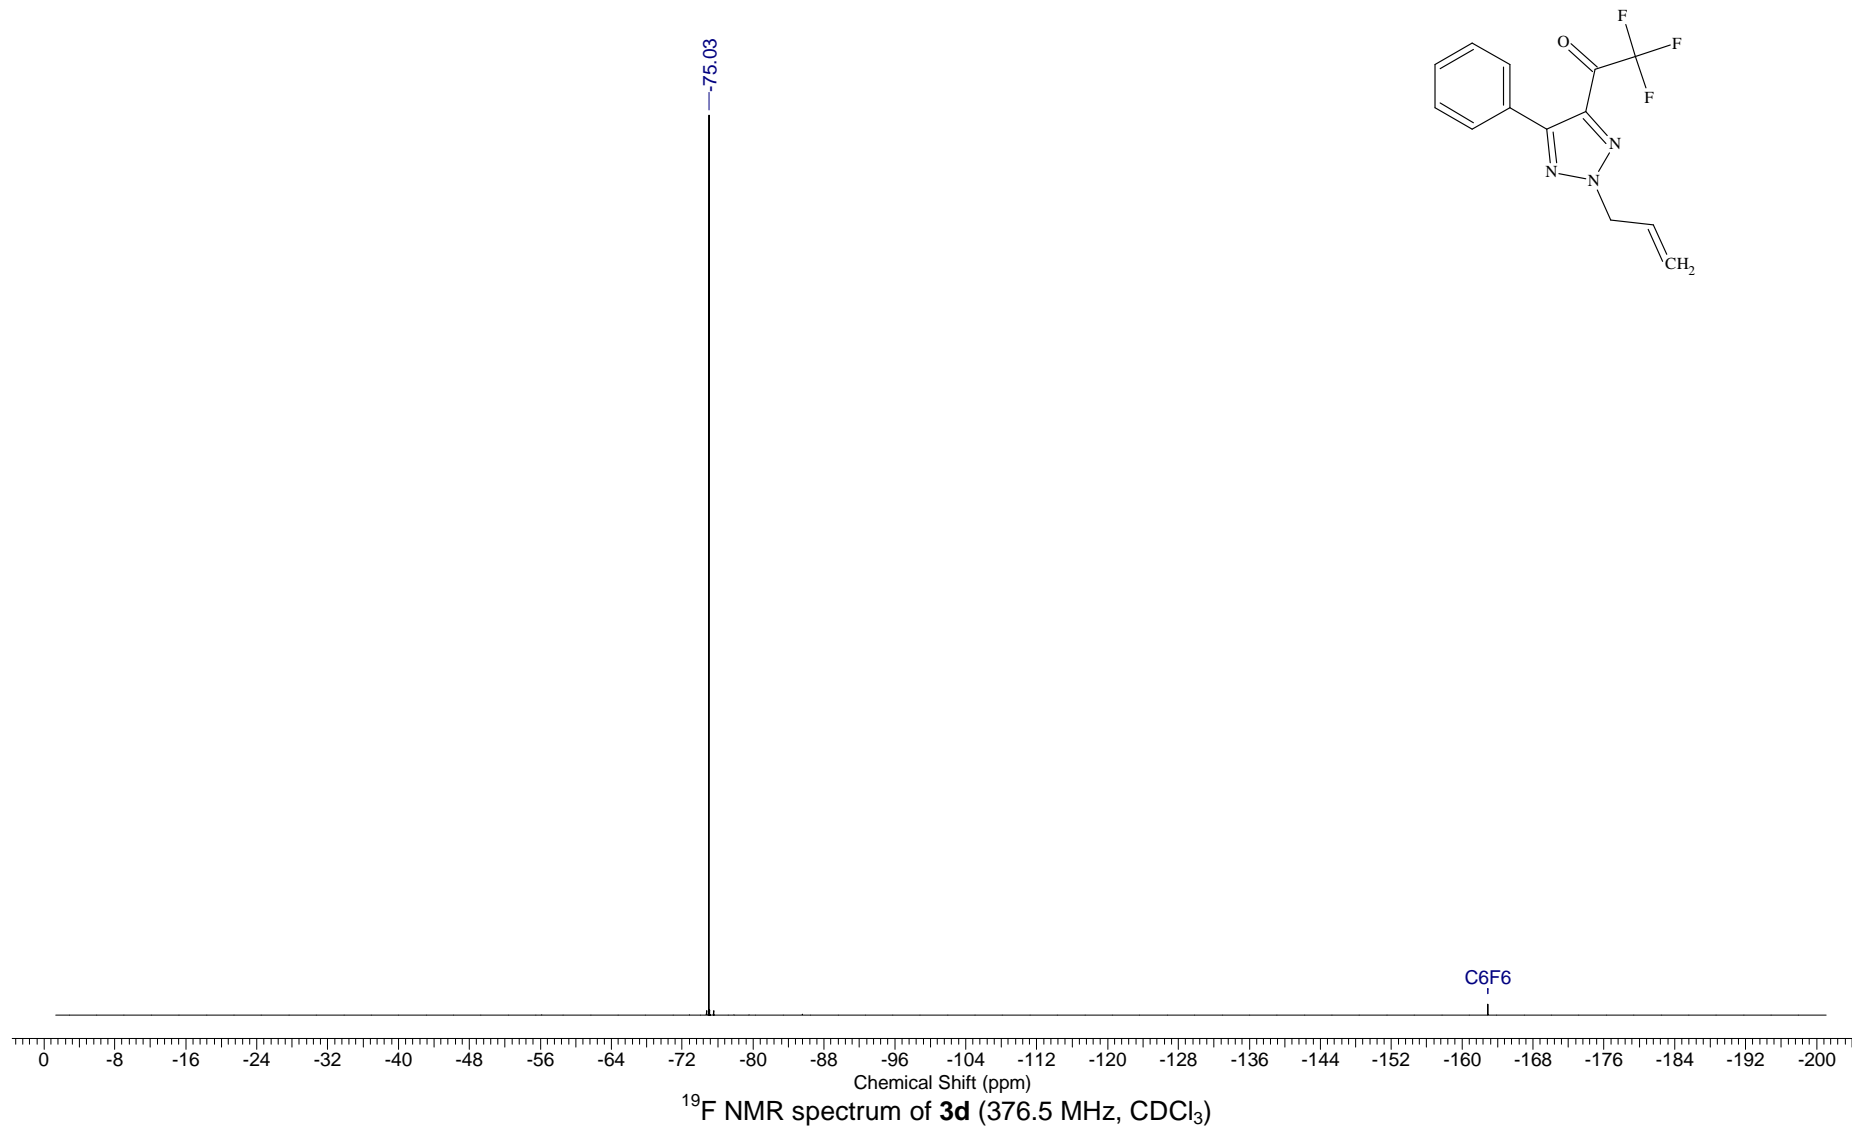

|                        |                                                       |                      |                      |                       |       |                  |                      |
|------------------------|-------------------------------------------------------|----------------------|----------------------|-----------------------|-------|------------------|----------------------|
| Acquisition Time (sec) | 0.6783                                                | Comment              | Imported from UXNMR. |                       |       | Date             | 07 Apr 2022 12:06:12 |
| File Name              | C:\DOCS\OUTPUT_301\2022\04.апрель\BM-2477-1.C_002001r |                      |                      |                       |       | Frequency (MHz)  | 100.61               |
| Nucleus                | 13C                                                   | Number of Transients | 257                  | Original Points Count | 16384 | Points Count     | 131072               |
| Pulse Sequence         | zgpg30                                                | Solvent              | CHLOROFORM-D         |                       |       | Sweep Width (Hz) | 24154.59             |
| Temperature (degree C) | 27.000                                                |                      |                      |                       |       |                  | F                    |

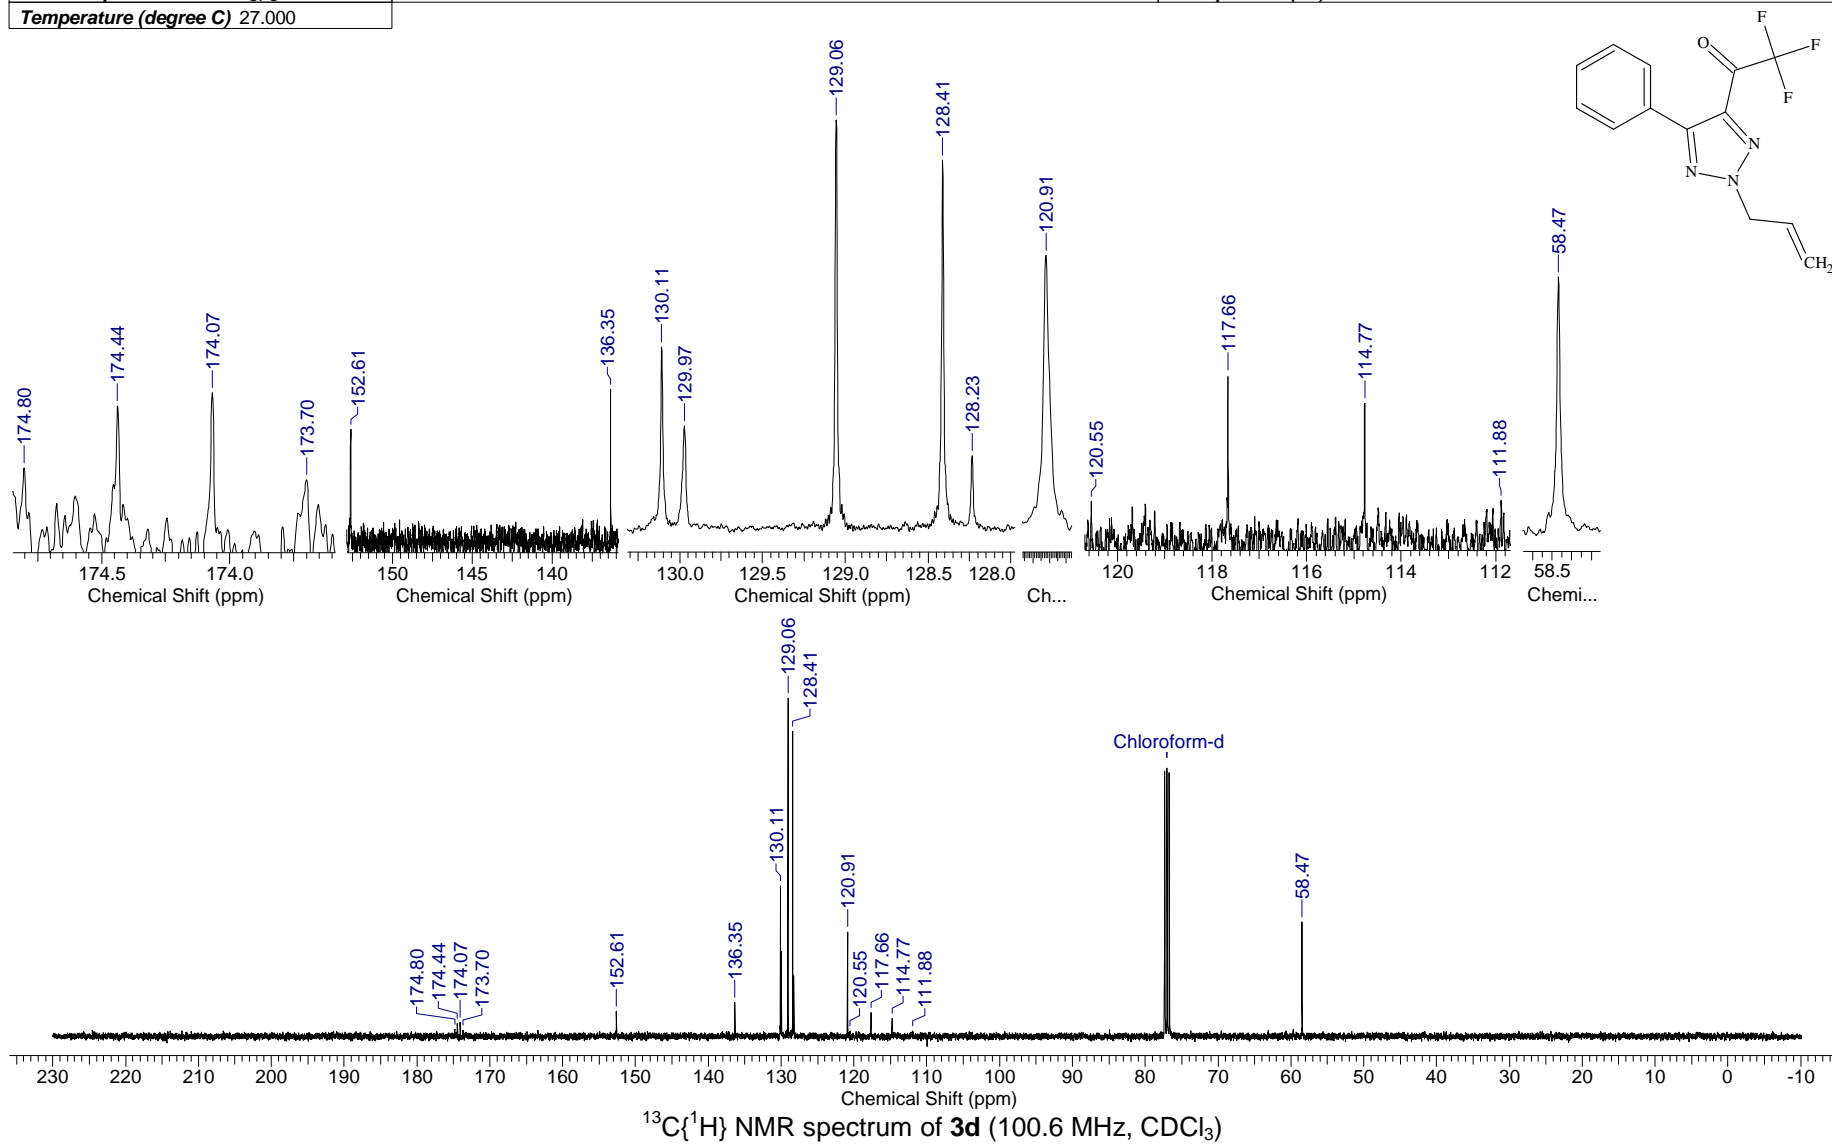

|                        |                                                       |                      |                      |                       |       |                  |                      |
|------------------------|-------------------------------------------------------|----------------------|----------------------|-----------------------|-------|------------------|----------------------|
| Acquisition Time (sec) | 4.0894                                                | Comment              | Imported from UXNMR. |                       |       | Date             | 07 Apr 2022 11:33:34 |
| File Name              | C:\DOCS\OUTPUT_301\2022\04.апрель\BM-2477-2.H_001001r |                      |                      |                       |       | Frequency (MHz)  | 400.13               |
| Nucleus                | 1H                                                    | Number of Transients | 4                    | Original Points Count | 32768 | Points Count     | 131072               |
| Pulse Sequence         | zg30                                                  | Solvent              | CHLOROFORM-D         |                       |       | Sweep Width (Hz) | 8012.82              |
| Temperature (degree C) | 27.000                                                |                      |                      |                       |       |                  |                      |

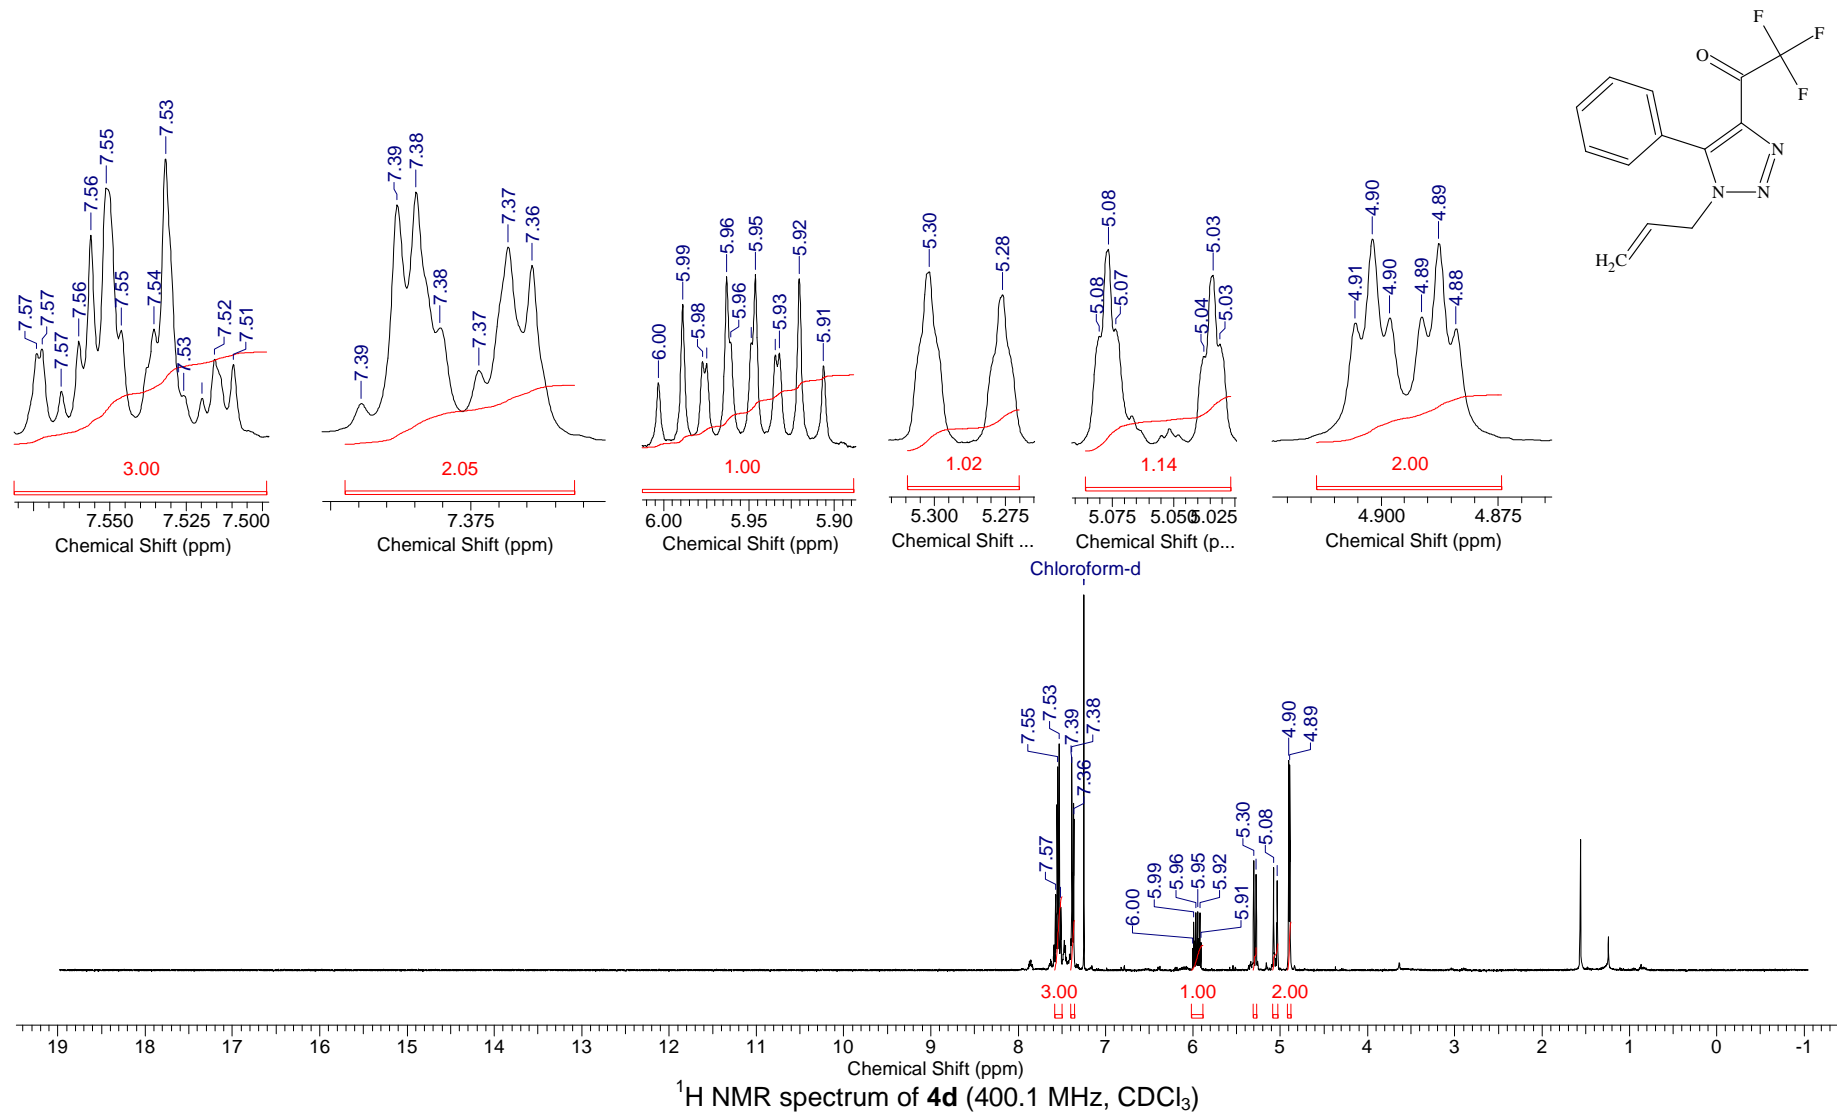

|                               |                                                       |                             |                      |                              |                      |
|-------------------------------|-------------------------------------------------------|-----------------------------|----------------------|------------------------------|----------------------|
| <b>Acquisition Time (sec)</b> | 1.7433                                                | <b>Comment</b>              | Imported from UXNMR. | <b>Date</b>                  | 07 Apr 2022 12:20:12 |
| <b>File Name</b>              | C:\DOCS\OUTPUT_301\2022\04.апрель\BM-2477-2.F_005001r | <b>Frequency (MHz)</b>      | 376.50               |                              |                      |
| <b>Nucleus</b>                | <sup>19</sup> F                                       | <b>Number of Transients</b> | 16                   | <b>Original Points Count</b> | 131072               |
| <b>Pulse Sequence</b>         | zgfgqn                                                | <b>Points Count</b>         | 262144               | <b>Sweep Width (Hz)</b>      | 75187.97             |
| <b>Temperature (degree C)</b> | 27.000                                                | <b>Solvent</b>              | CHLOROFORM-D         |                              |                      |

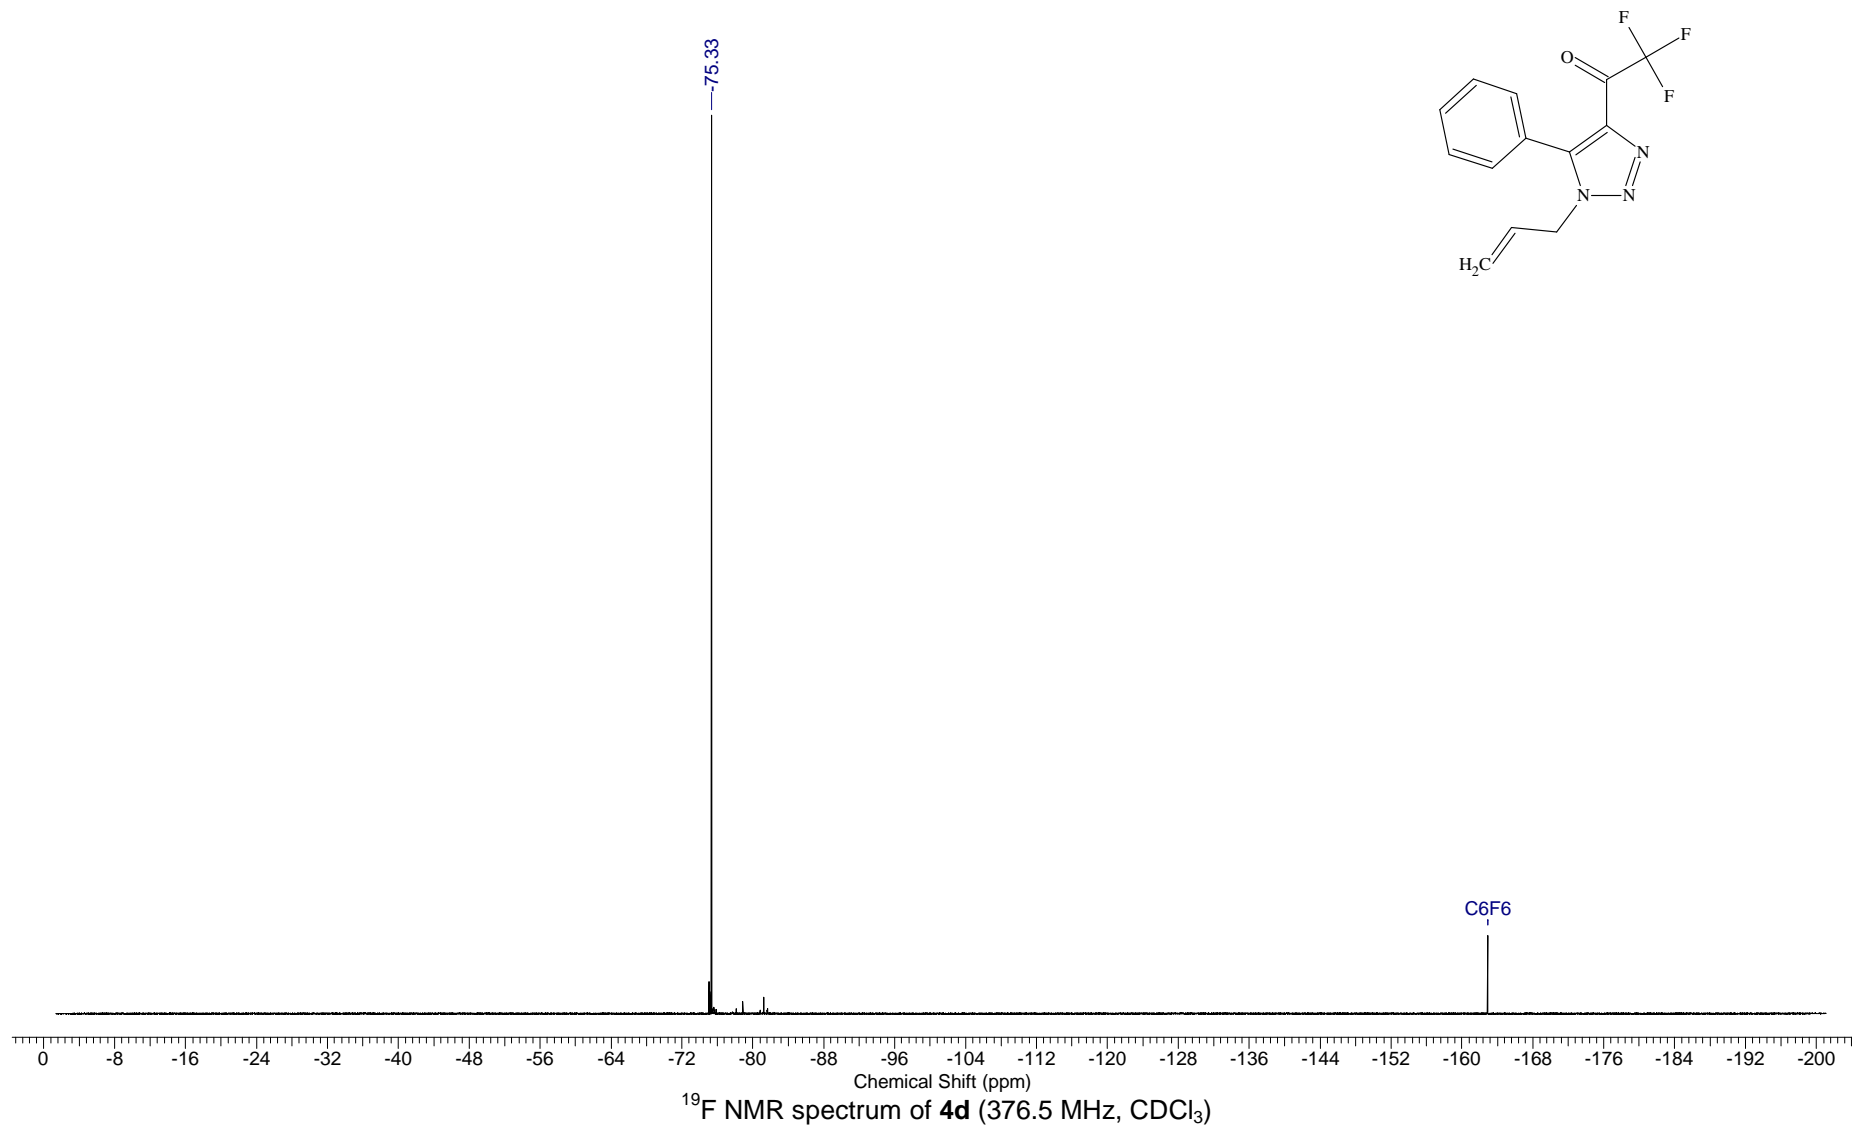

|                        |                                                          |                      |                      |                       |                      |
|------------------------|----------------------------------------------------------|----------------------|----------------------|-----------------------|----------------------|
| Acquisition Time (sec) | 4.0894                                                   | Comment              | Imported from UXNMR. | Date                  | 18 Mar 2022 15:09:20 |
| File Name              | C:\DOCS\OUTPUT_301\2022\03.mapr\1SZA-BM-2460-7.H_001001r | Frequency (MHz)      | 400.13               | Points Count          | 131072               |
| Nucleus                | 1H                                                       | Number of Transients | 4                    | Original Points Count | 32768                |
| Pulse Sequence         | zg30                                                     | Solvent              | CHLOROFORM-D         | Sweep Width (Hz)      | 8012.82              |
| Temperature (degree C) | 27.000                                                   |                      |                      |                       |                      |

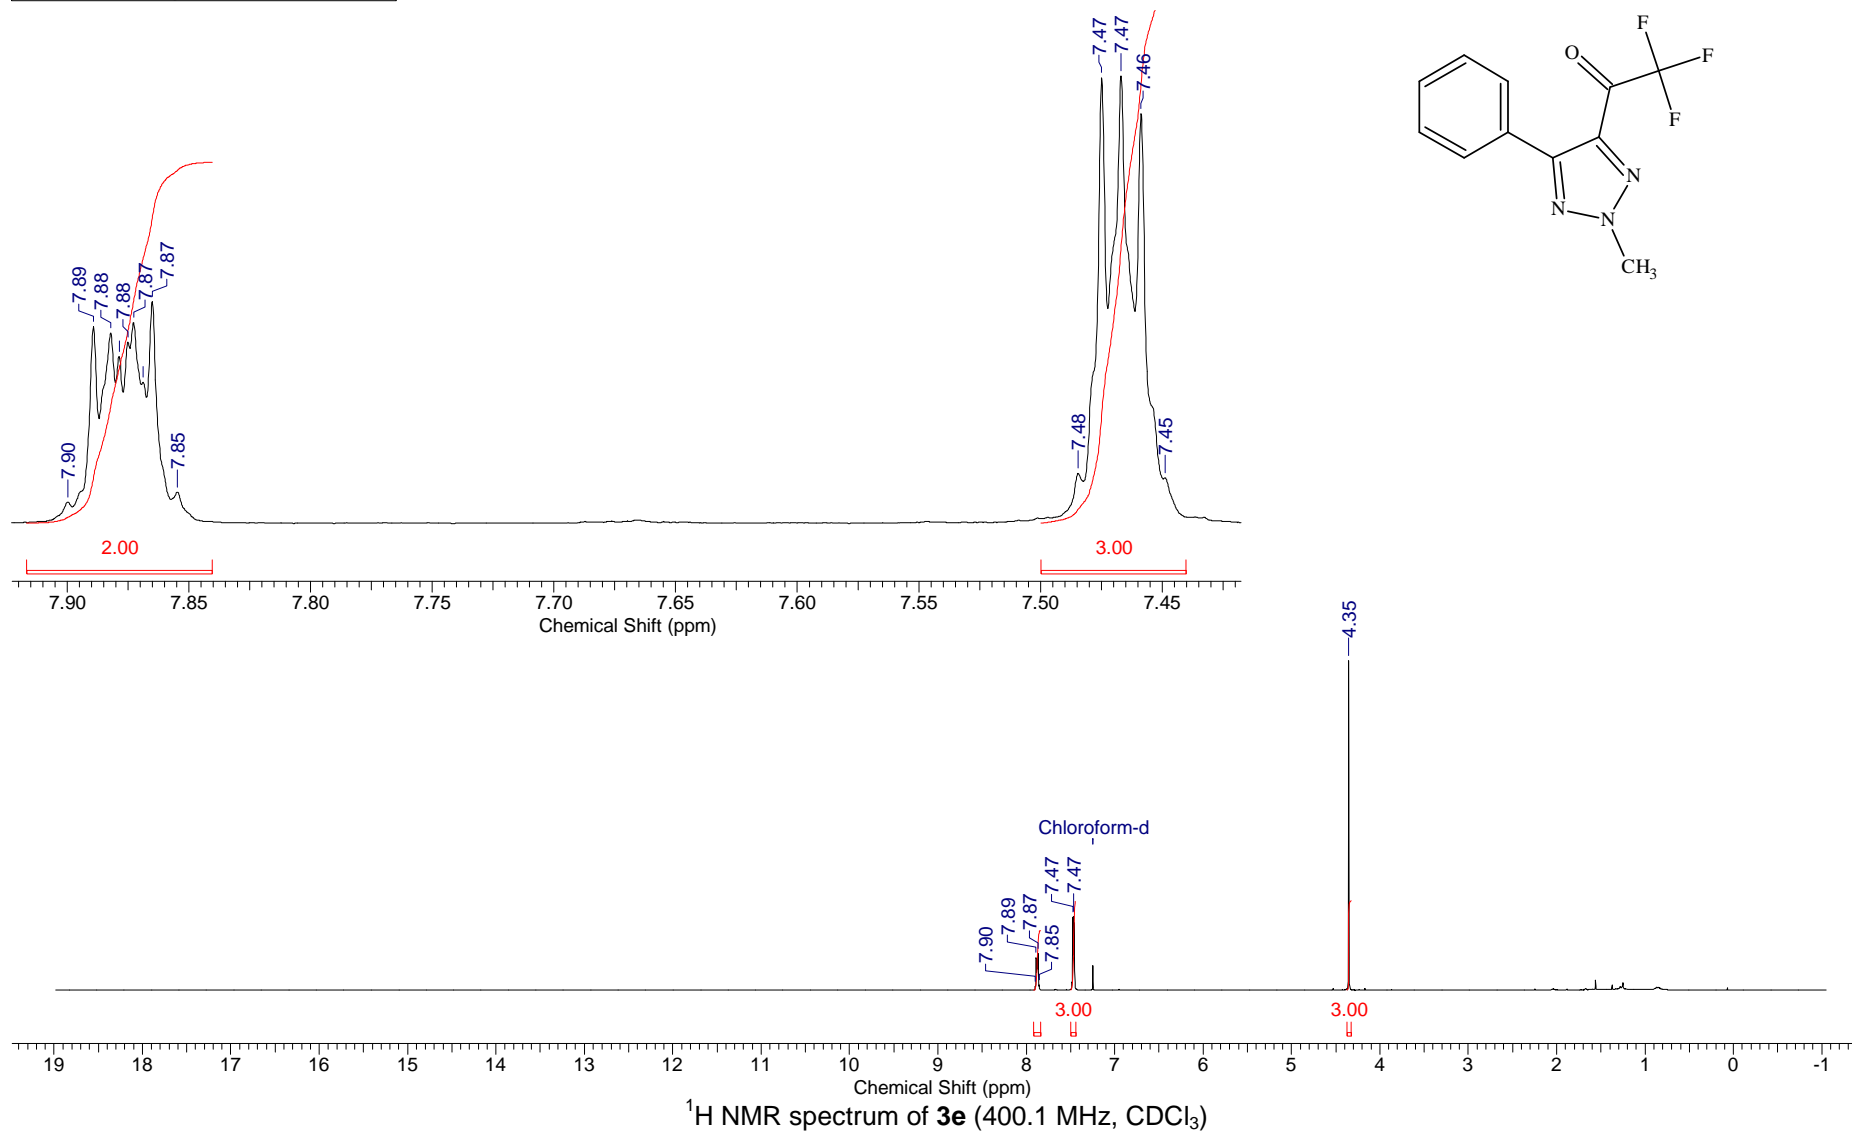



|                               |                                                        |                             |                      |                              |                      |
|-------------------------------|--------------------------------------------------------|-----------------------------|----------------------|------------------------------|----------------------|
| <b>Acquisition Time (sec)</b> | 1.7433                                                 | <b>Comment</b>              | Imported from UXNMR. | <b>Date</b>                  | 18 Mar 2022 15:43:00 |
| <b>File Name</b>              | C:\DOCS\OUTPUT_301\2022\03.mapr\SA-BM-2460-7.F_005001r |                             |                      | <b>Frequency (MHz)</b>       | 376.50               |
| <b>Nucleus</b>                | <sup>19</sup> F                                        | <b>Number of Transients</b> | 4                    | <b>Original Points Count</b> | 131072               |
| <b>Pulse Sequence</b>         | zgfgn                                                  | <b>Solvent</b>              | CHLOROFORM-D         | <b>Points Count</b>          | 262144               |
| <b>Temperature (degree C)</b> | 27.000                                                 |                             |                      | <b>Sweep Width (Hz)</b>      | 75187.97             |

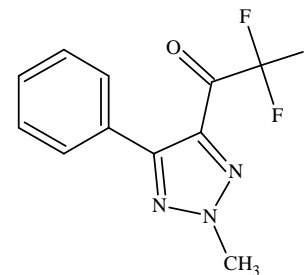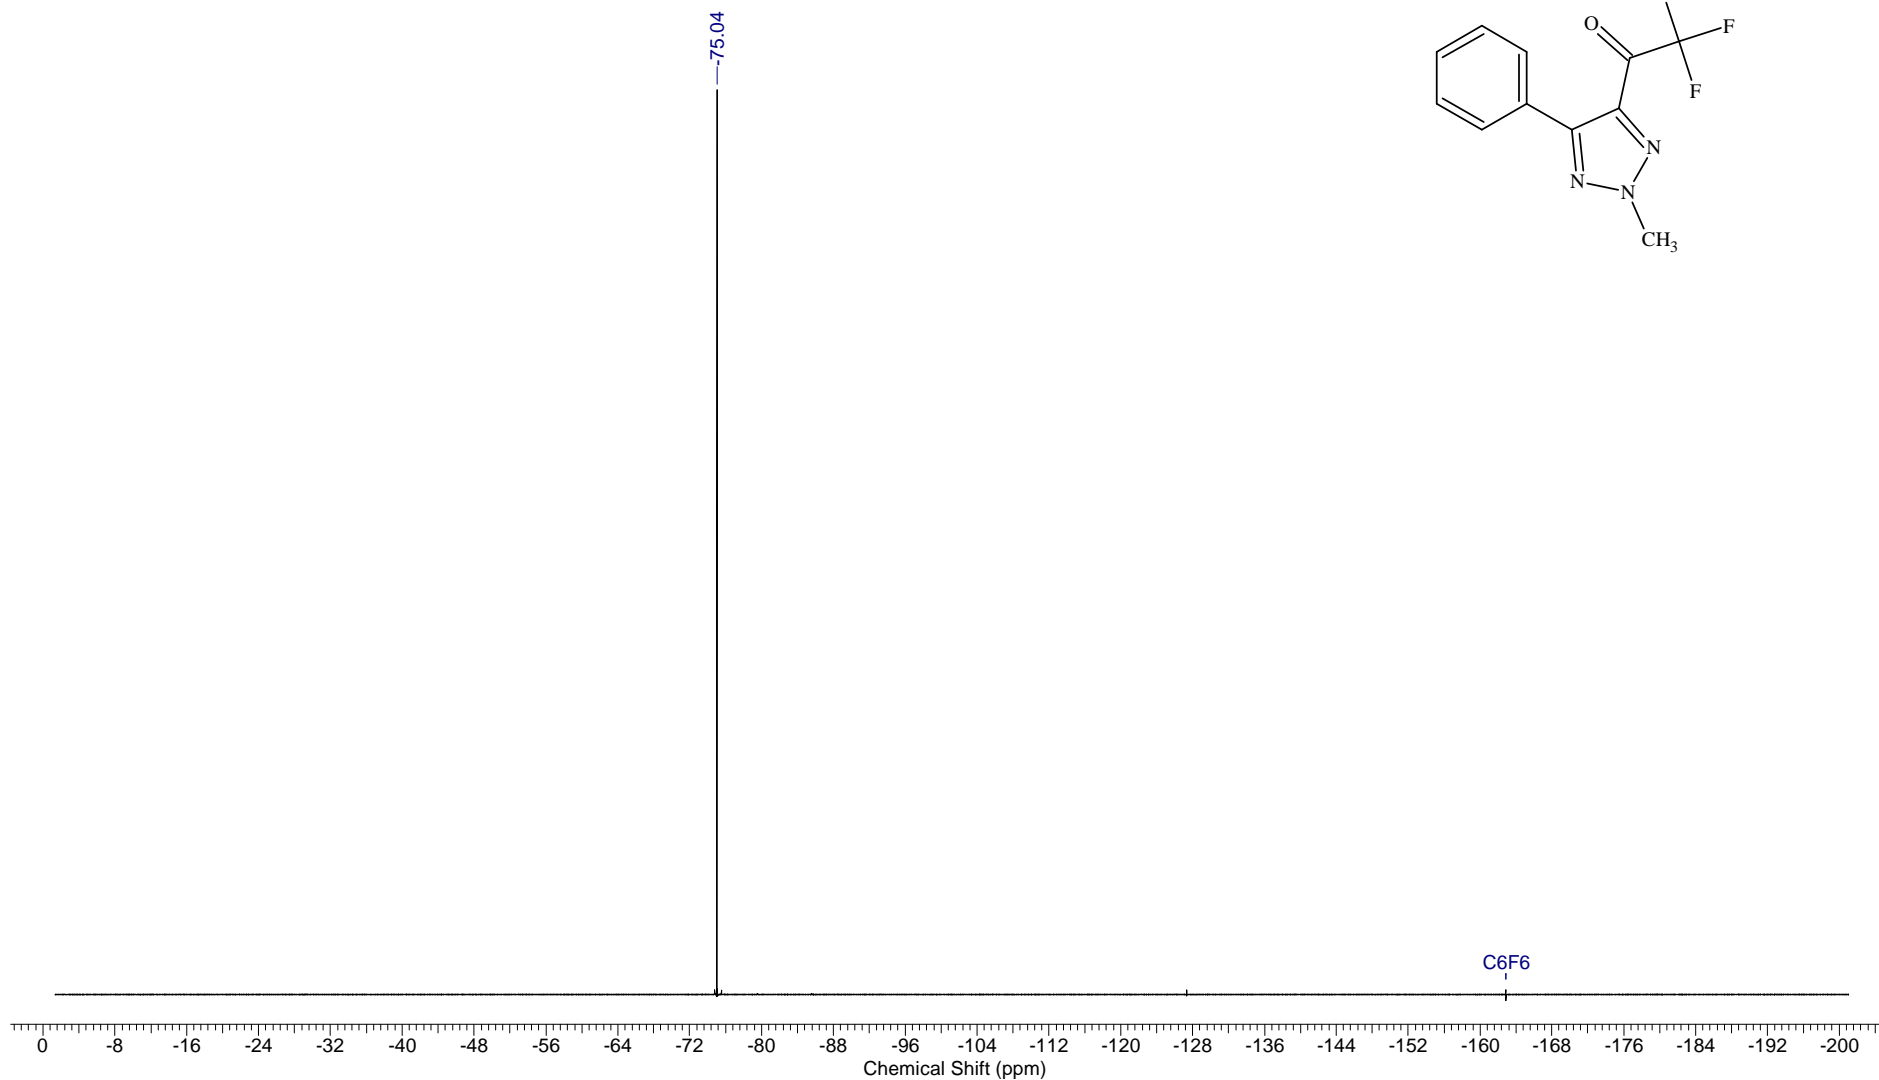

<sup>19</sup>F NMR spectrum of **3e** (376.5 MHz, CDCl<sub>3</sub>)

|                        |                                                          |                              |         |                       |                 |                        |        |
|------------------------|----------------------------------------------------------|------------------------------|---------|-----------------------|-----------------|------------------------|--------|
| Acquisition Time (sec) | 0.6783                                                   | Comment Imported from UXNMR. |         |                       | Date            | 21 Mar 2022 15:59:54   |        |
| File Name              | C:\DOCS\OUTPUT_301\2022\03.mapr\1SZA-BM-2460-7.C_002001r |                              |         |                       | Frequency (MHz) | 100.61                 |        |
| Nucleus                | 13C                                                      | Number of Transients         | 161     | Original Points Count | 16384           | Points Count           | 131072 |
| Pulse Sequence         | zgpg30                                                   | Solvent                      | DMSO-D6 | Sweep Width (Hz)      | 24154.59        | Temperature (degree C) | 27.000 |

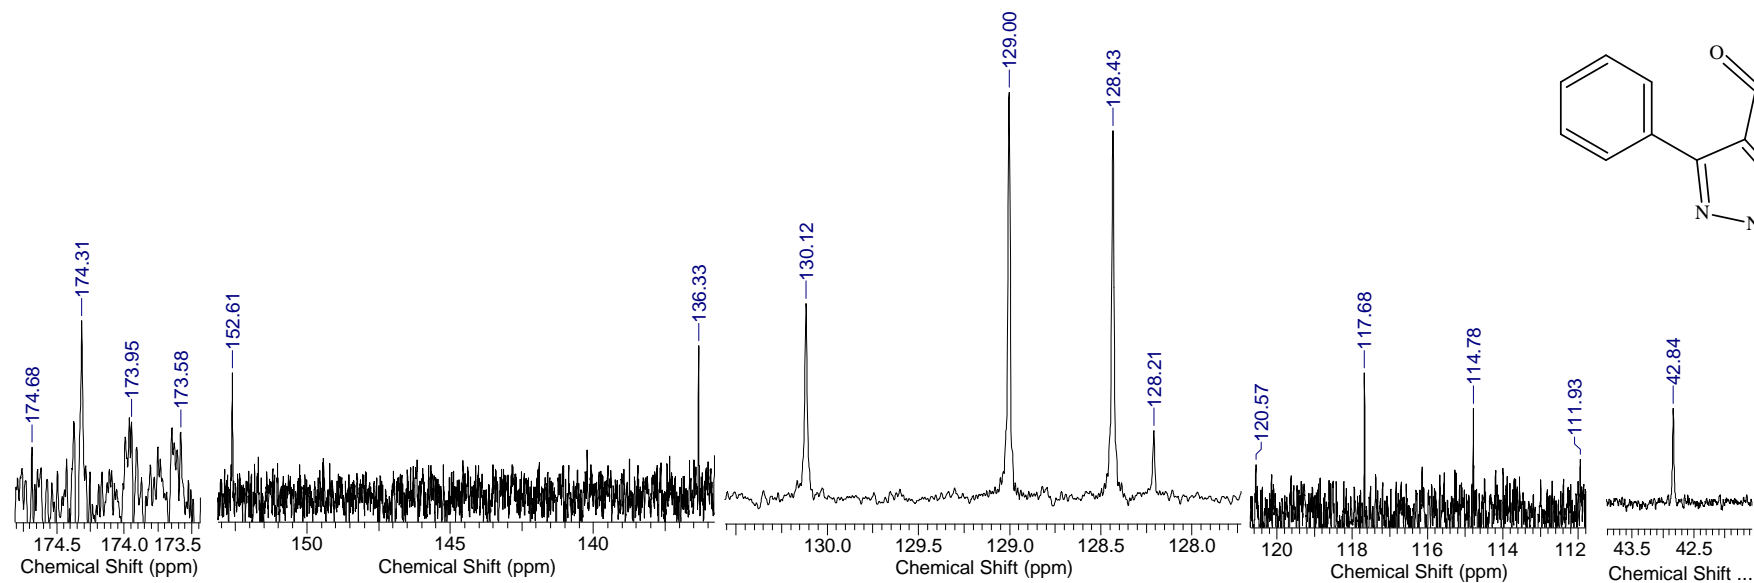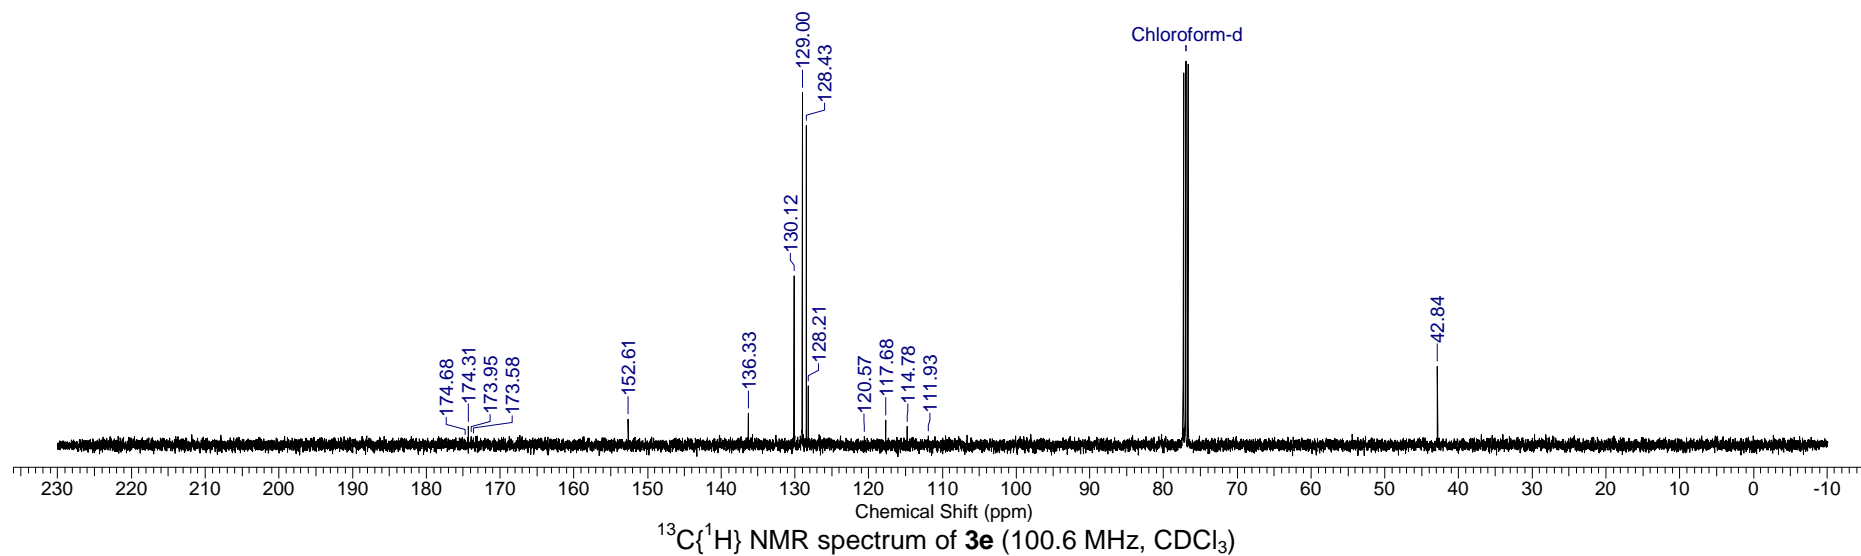

|                               |                                                                  |                             |                      |                              |                      |
|-------------------------------|------------------------------------------------------------------|-----------------------------|----------------------|------------------------------|----------------------|
| <b>Acquisition Time (sec)</b> | 4.0894                                                           | <b>Comment</b>              | Imported from UXNMR. | <b>Date</b>                  | 23 Mar 2022 00:03:58 |
| <b>File Name</b>              | C:\DOCS\BM\ЯMP СОСЕДИ\2022\SZA-BM-2460-14\SZA-BM-2460-14_001001r | <b>Frequency (MHz)</b>      | 400.13               | <b>Points Count</b>          | 131072               |
| <b>Nucleus</b>                | <sup>1</sup> H                                                   | <b>Number of Transients</b> | 8                    | <b>Original Points Count</b> | 32768                |
| <b>Pulse Sequence</b>         | zg30                                                             | <b>Solvent</b>              | CHLOROFORM-D         | <b>Sweep Width (Hz)</b>      | 8012.82              |
| <b>Temperature (degree C)</b> | 27.000                                                           |                             |                      |                              |                      |

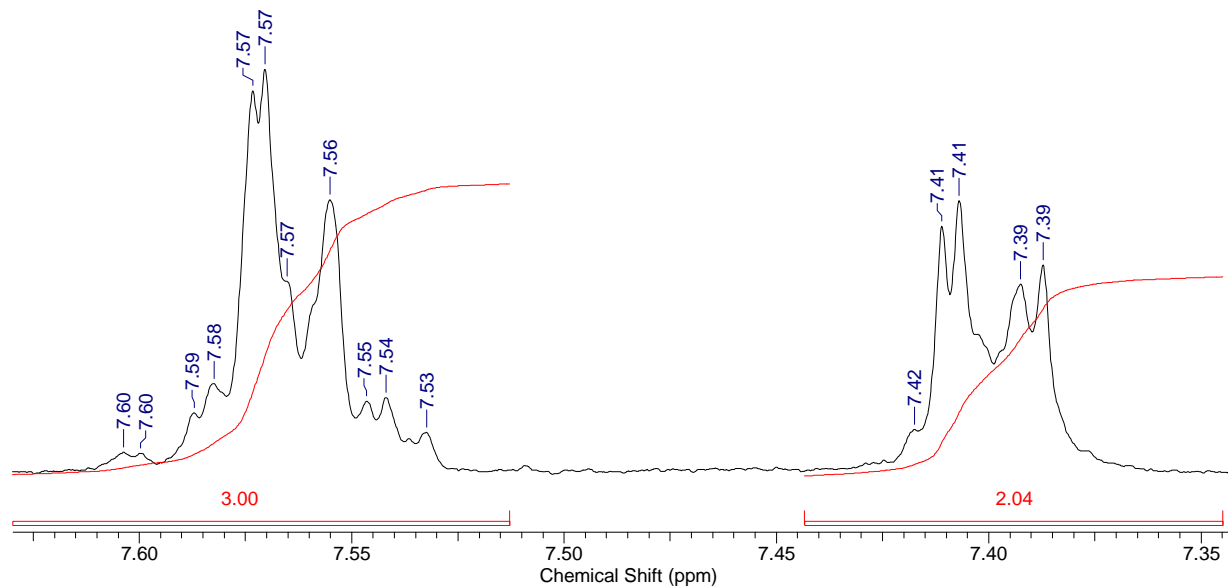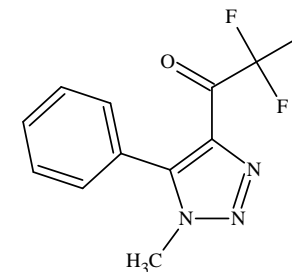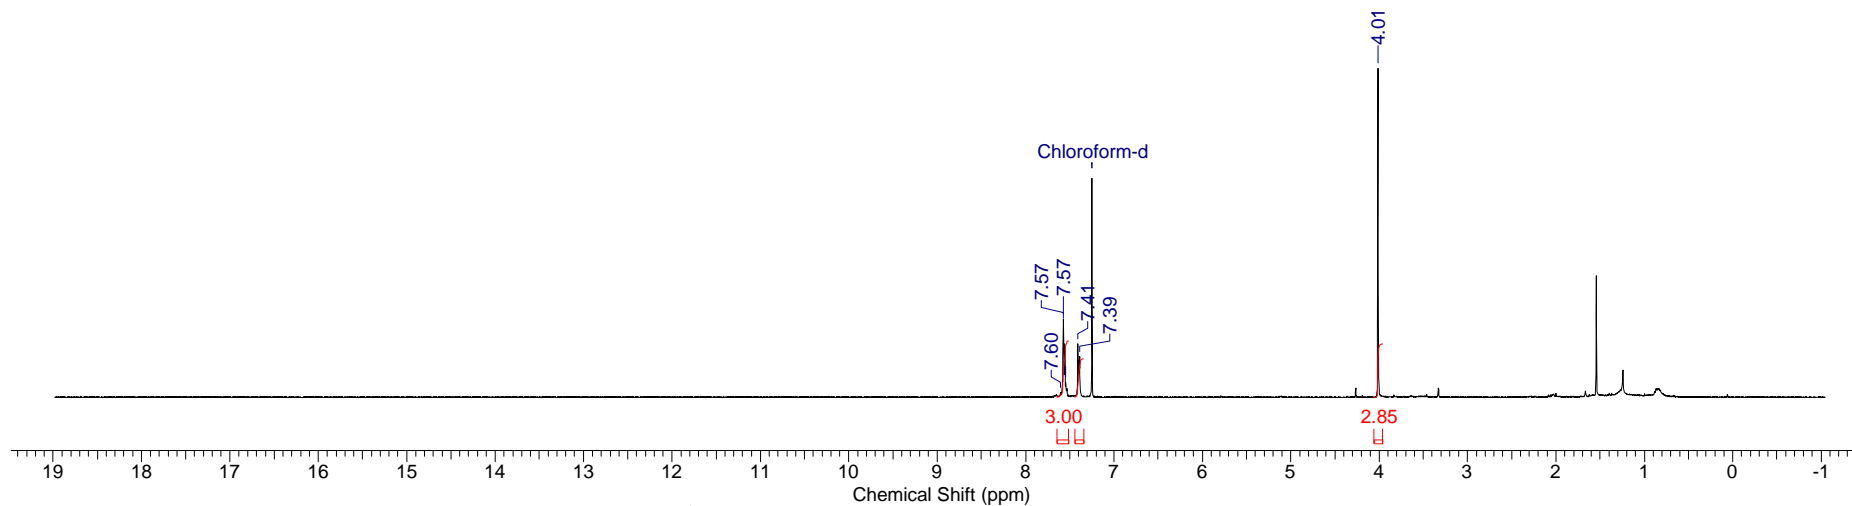

<sup>1</sup>H NMR spectrum of **4e** (400.1 MHz, CDCl<sub>3</sub>)

|                        |                                                         |                      |                      |                       |        |                  |                      |
|------------------------|---------------------------------------------------------|----------------------|----------------------|-----------------------|--------|------------------|----------------------|
| Acquisition Time (sec) | 1.7433                                                  | Comment              | Imported from UXNMR. |                       |        | Date             | 22 Mar 2022 15:09:02 |
| File Name              | C:\DOCS\OUTPUT_301\2022\03.mapr\SA-BM-2460-14.F_005001r |                      |                      |                       |        | Frequency (MHz)  | 376.50               |
| Nucleus                | 19F                                                     | Number of Transients | 4                    | Original Points Count | 131072 | Points Count     | 262144               |
| Pulse Sequence         | zgfgqn                                                  | Solvent              | CHLOROFORM-D         |                       |        | Sweep Width (Hz) | 75187.97             |
| Temperature (degree C) | 27.000                                                  |                      |                      |                       |        |                  |                      |

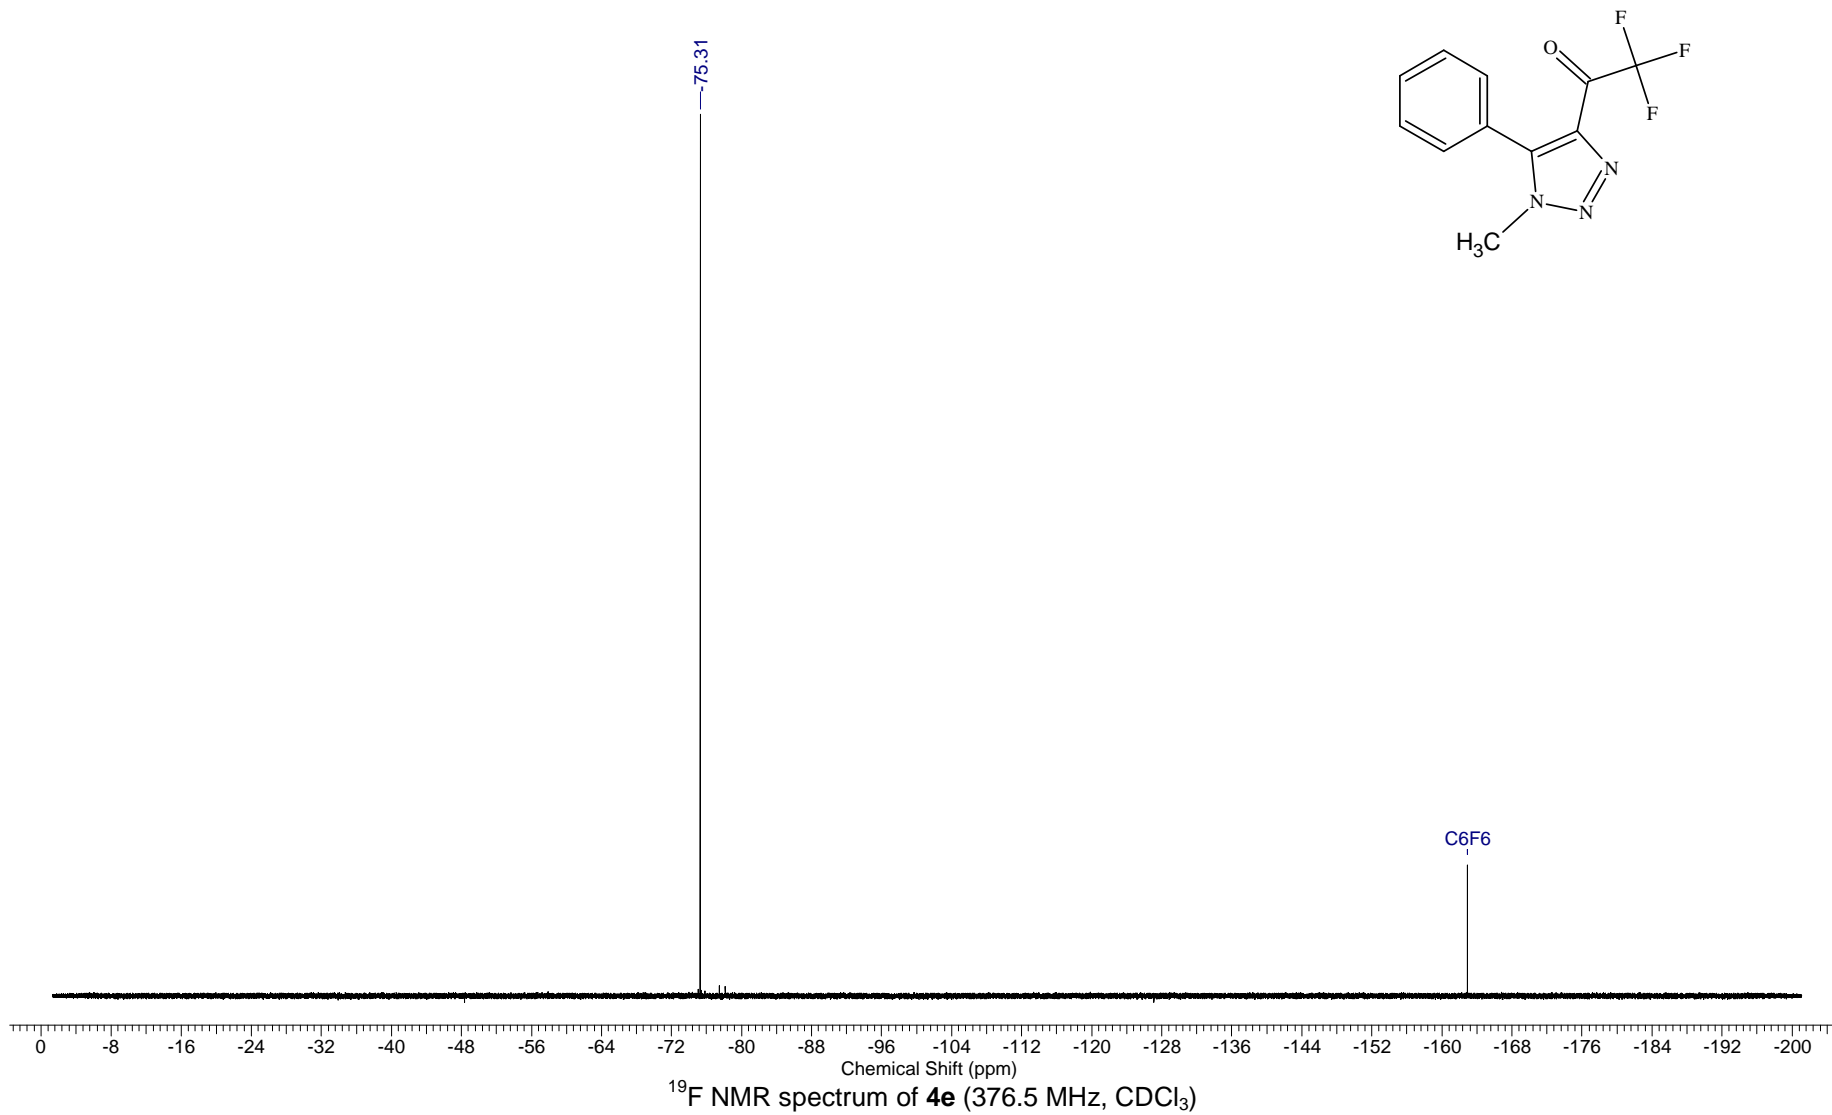

|                               |                                                         |                                     |              |                              |                         |                      |        |
|-------------------------------|---------------------------------------------------------|-------------------------------------|--------------|------------------------------|-------------------------|----------------------|--------|
| <b>Acquisition Time (sec)</b> | 0.6783                                                  | <b>Comment</b> Imported from UXNMR. |              |                              | <b>Date</b>             | 25 Mar 2022 15:18:18 |        |
| <b>File Name</b>              | C:\DOCS\OUTPUT_301\2022\03.mapr\SA-BM-2460-14.C_002001r |                                     |              |                              | <b>Frequency (MHz)</b>  | 100.61               |        |
| <b>Nucleus</b>                | 13C                                                     | <b>Number of Transients</b>         | 2169         | <b>Original Points Count</b> | 16384                   | <b>Points Count</b>  | 131072 |
| <b>Pulse Sequence</b>         | zgpg30                                                  | <b>Solvent</b>                      | CHLOROFORM-D |                              | <b>Sweep Width (Hz)</b> | 24154.59             |        |
| <b>Temperature (degree C)</b> | 27.000                                                  |                                     |              |                              |                         |                      | F      |

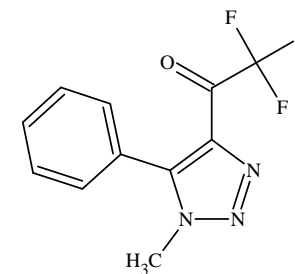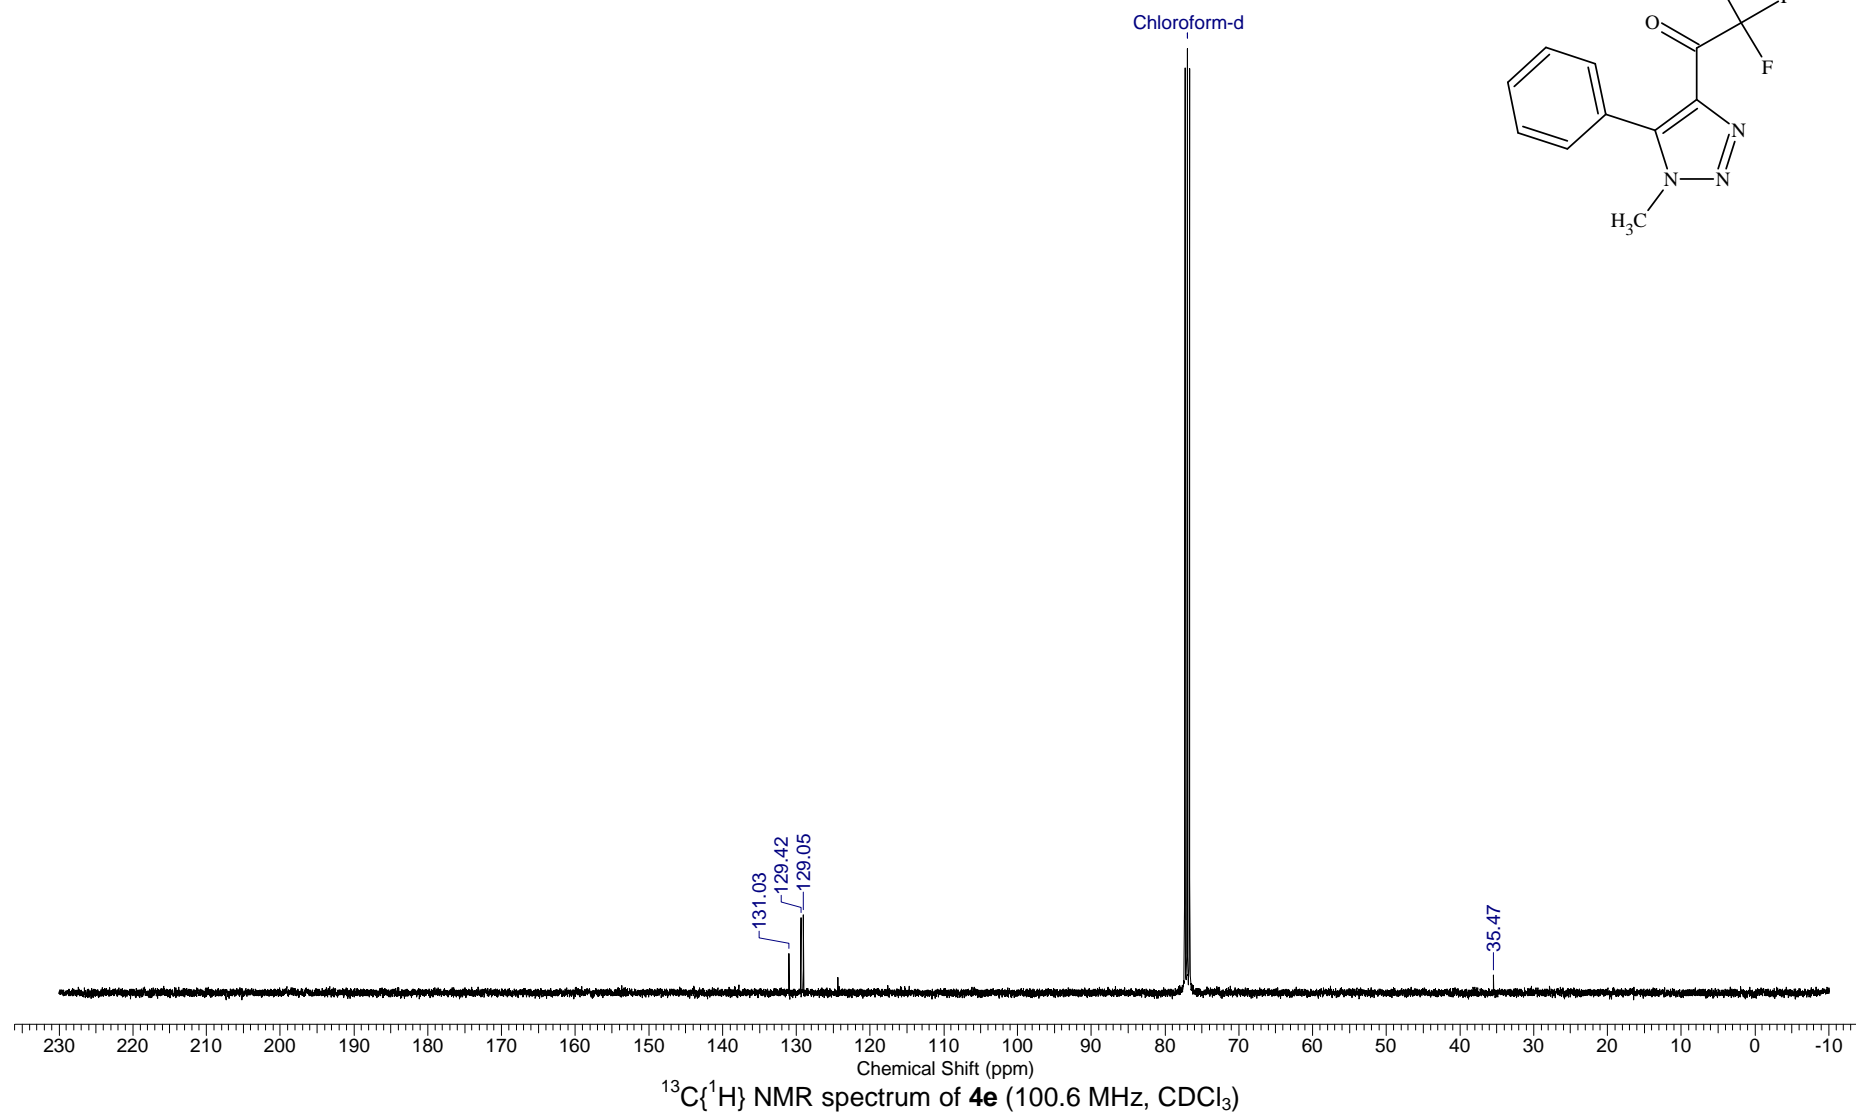

|                        |                                                                     |                      |                      |                       |                 |                        |        |
|------------------------|---------------------------------------------------------------------|----------------------|----------------------|-----------------------|-----------------|------------------------|--------|
| Acquisition Time (sec) | 4.0894                                                              | Comment              | Imported from UXNMR. |                       | Date            | 05 Apr 2022 11:46:08   |        |
| File Name              | C:\DOCS\OUTPUT_301\2022\04.апрель\BM-2478-1.H\BM-2478-1.H_001000fid |                      |                      |                       | Frequency (MHz) | 400.13                 |        |
| Nucleus                | 1H                                                                  | Number of Transients | 4                    | Original Points Count | 32768           | Points Count           | 32768  |
| Pulse Sequence         | zg30                                                                | Solvent              | BENZENE-D6           | Sweep Width (Hz)      | 8012.82         | Temperature (degree C) | 27.000 |

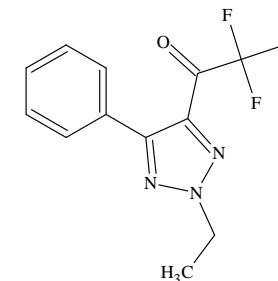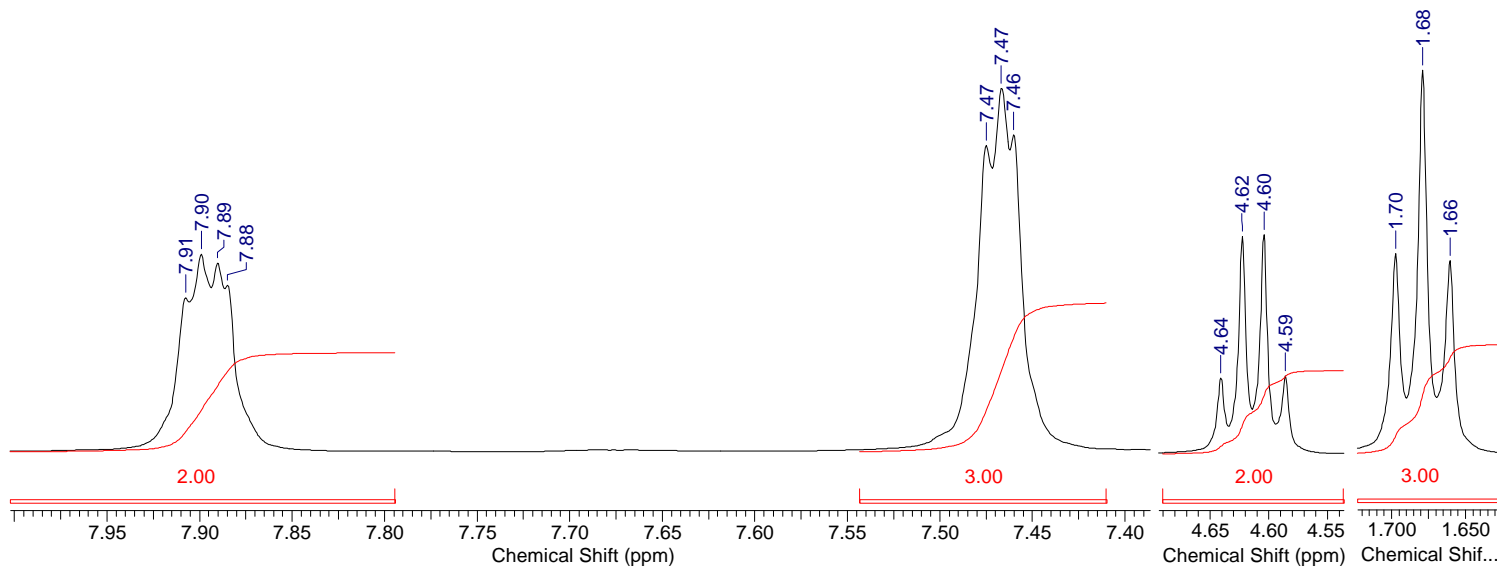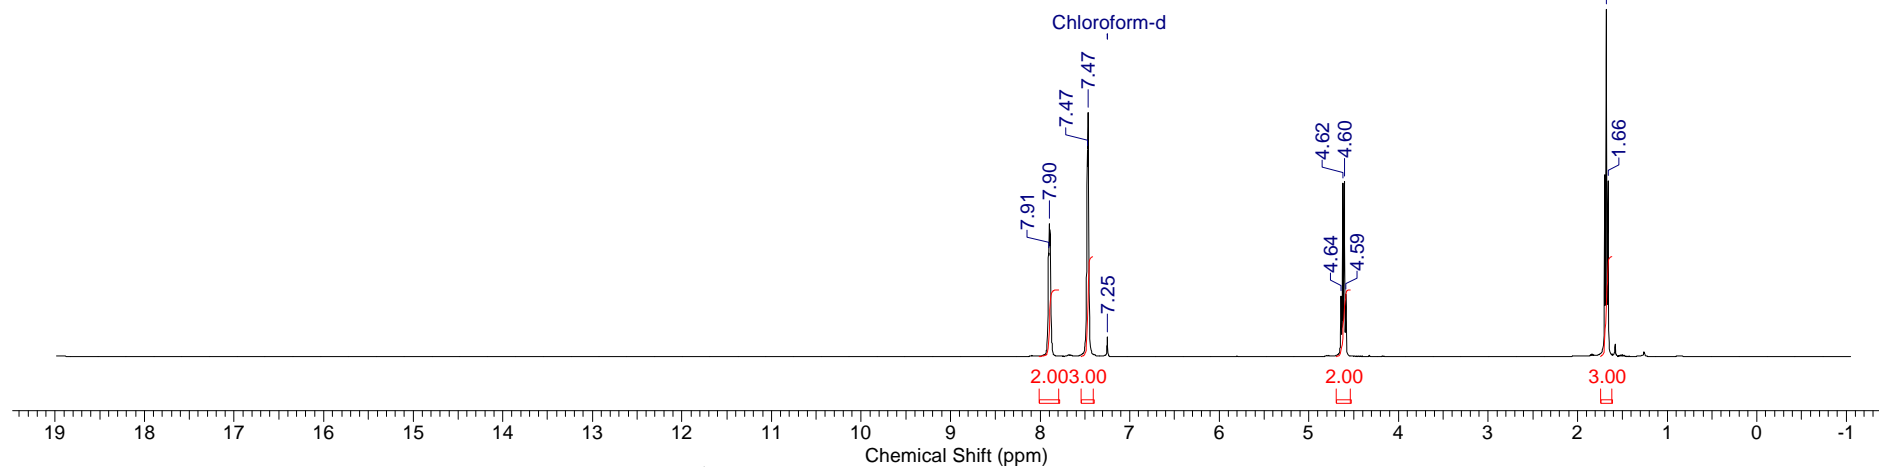<sup>1</sup>H NMR spectrum of **3f** (400.1 MHz, CDCl<sub>3</sub>)

|                        |                                                         |                      |                      |                       |        |                  |                      |
|------------------------|---------------------------------------------------------|----------------------|----------------------|-----------------------|--------|------------------|----------------------|
| Acquisition Time (sec) | 1.7433                                                  | Comment              | Imported from UXNMR. |                       |        | Date             | 05 Apr 2022 15:25:08 |
| File Name              | C:\DOCS\OUTPUT_301\2022\04.апрель\BM-2478-1.F.F_005001r |                      |                      |                       |        | Frequency (MHz)  | 376.50               |
| Nucleus                | 19F                                                     | Number of Transients | 4                    | Original Points Count | 131072 | Points Count     | 262144               |
| Pulse Sequence         | zgfgqn                                                  | Solvent              | CHLOROFORM-D         |                       |        | Sweep Width (Hz) | 75187.97             |
| Temperature (degree C) | 27.000                                                  |                      |                      |                       |        |                  |                      |

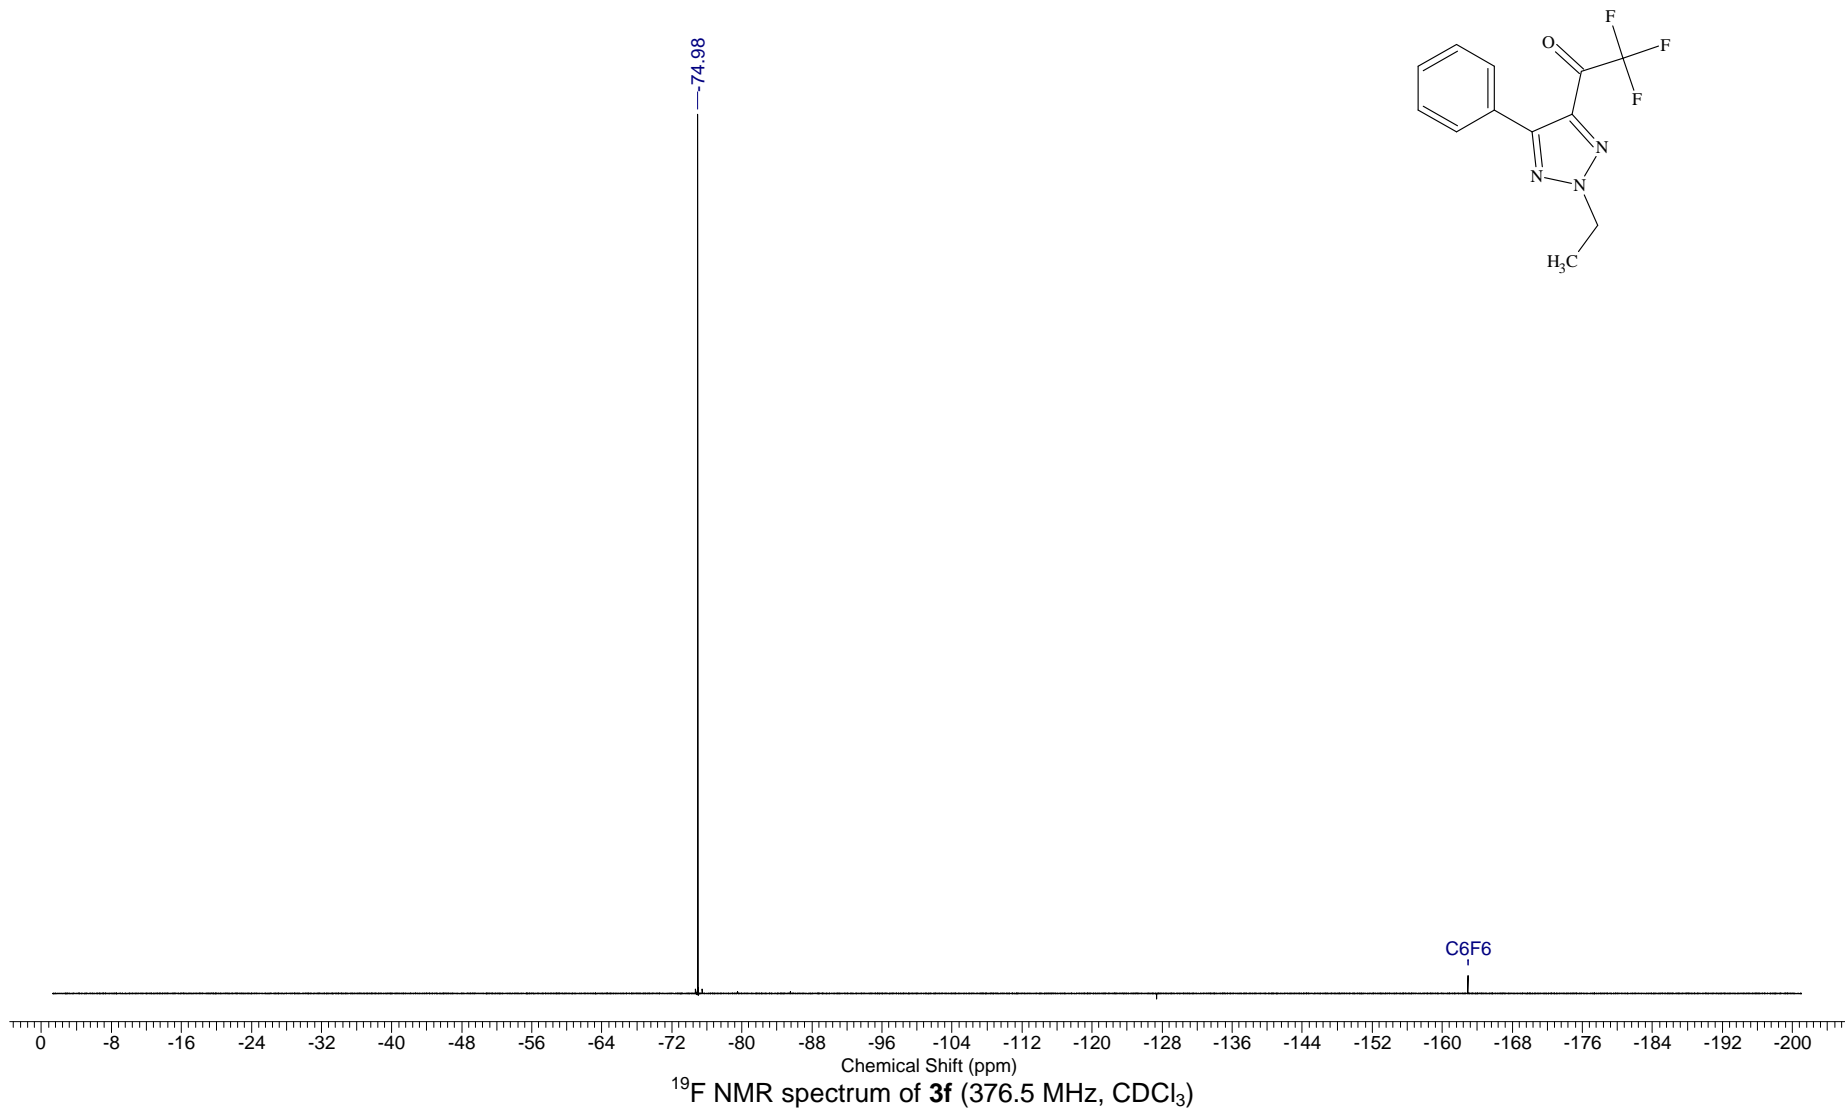

|                               |                                                       |                             |                      |                              |                      |
|-------------------------------|-------------------------------------------------------|-----------------------------|----------------------|------------------------------|----------------------|
| <b>Acquisition Time (sec)</b> | 0.6783                                                | <b>Comment</b>              | Imported from UXNMR. | <b>Date</b>                  | 05 Apr 2022 14:57:30 |
| <b>File Name</b>              | C:\DOCS\OUTPUT_301\2022\04.апрель\BM-2478-1.C_002001r | <b>Frequency (MHz)</b>      | 100.61               | <b>Points Count</b>          | 131072               |
| <b>Nucleus</b>                | <sup>13</sup> C                                       | <b>Number of Transients</b> | 281                  | <b>Original Points Count</b> | 16384                |
| <b>Pulse Sequence</b>         | zgpg30                                                | <b>Solvent</b>              | CHLOROFORM-D         | <b>Sweep Width (Hz)</b>      | 24154.59             |
| <b>Temperature (degree C)</b> | 27.000                                                |                             |                      |                              |                      |

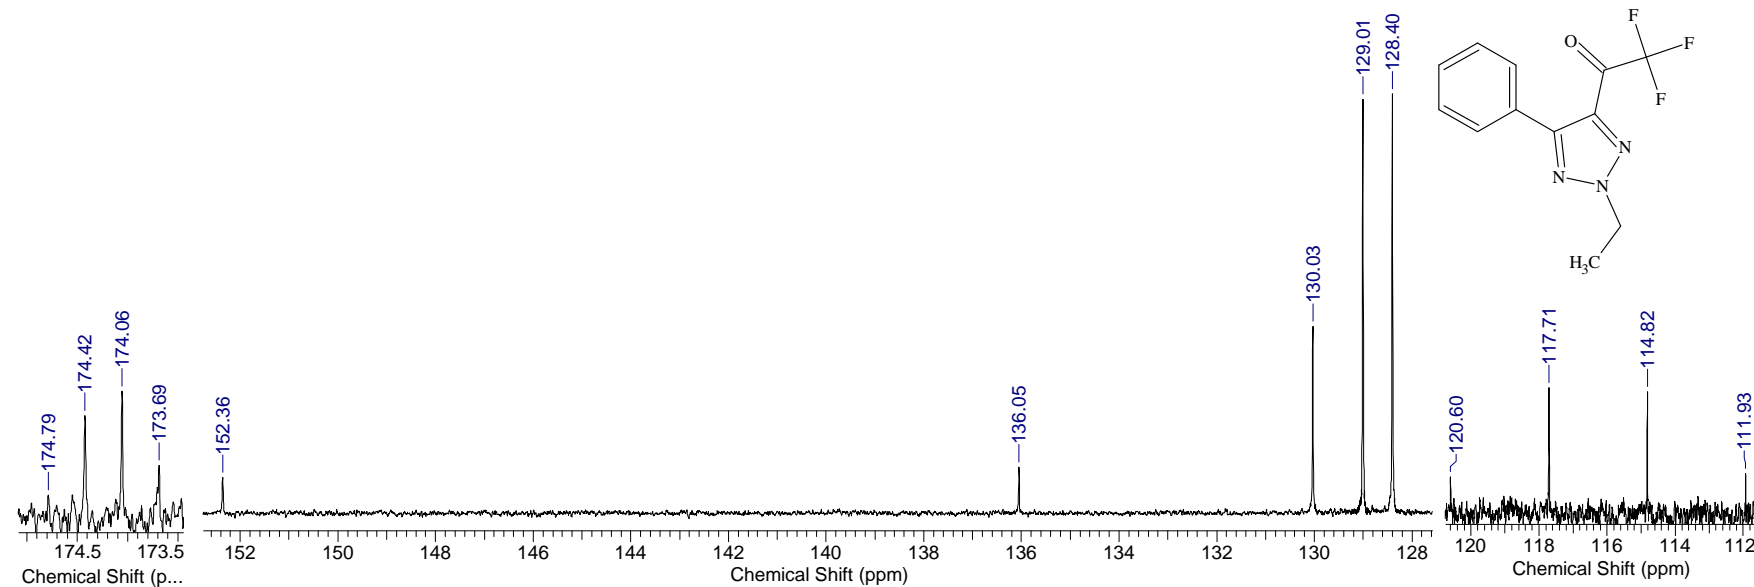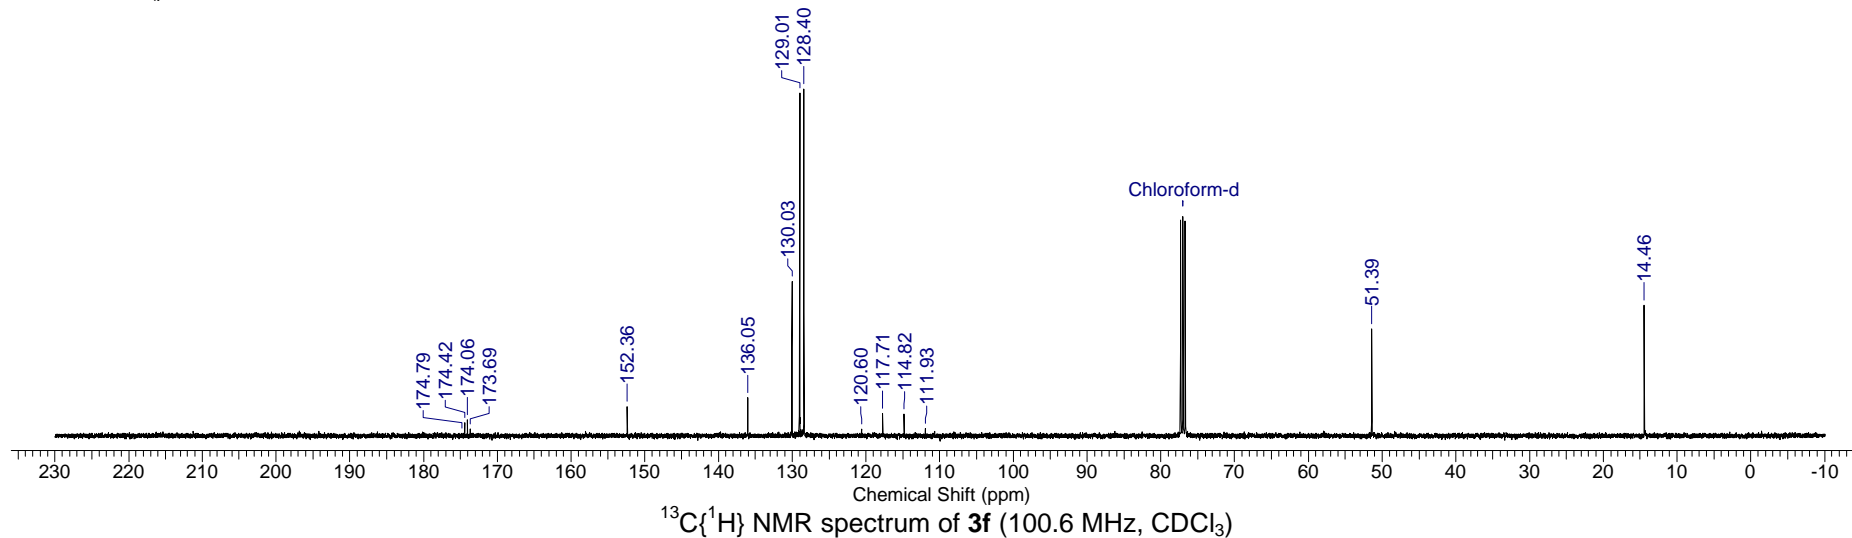



|                               |                                                       |                             |                      |                              |                         |                      |                               |        |
|-------------------------------|-------------------------------------------------------|-----------------------------|----------------------|------------------------------|-------------------------|----------------------|-------------------------------|--------|
| <b>Acquisition Time (sec)</b> | 4.0894                                                | <b>Comment</b>              | Imported from UXNMR. |                              | <b>Date</b>             | 05 Apr 2022 15:03:36 |                               |        |
| <b>File Name</b>              | C:\DOCS\OUTPUT_301\2022\04.апрель\BM-2478-2.H_001001r |                             |                      |                              | <b>Frequency (MHz)</b>  | 400.13               |                               |        |
| <b>Nucleus</b>                | 1H                                                    | <b>Number of Transients</b> | 4                    | <b>Original Points Count</b> | 32768                   | <b>Points Count</b>  | 131072                        |        |
| <b>Pulse Sequence</b>         | zg30                                                  | <b>Solvent</b>              | BENZENE-D6           |                              | <b>Sweep Width (Hz)</b> | 8012.82              | <b>Temperature (degree C)</b> | 27.000 |

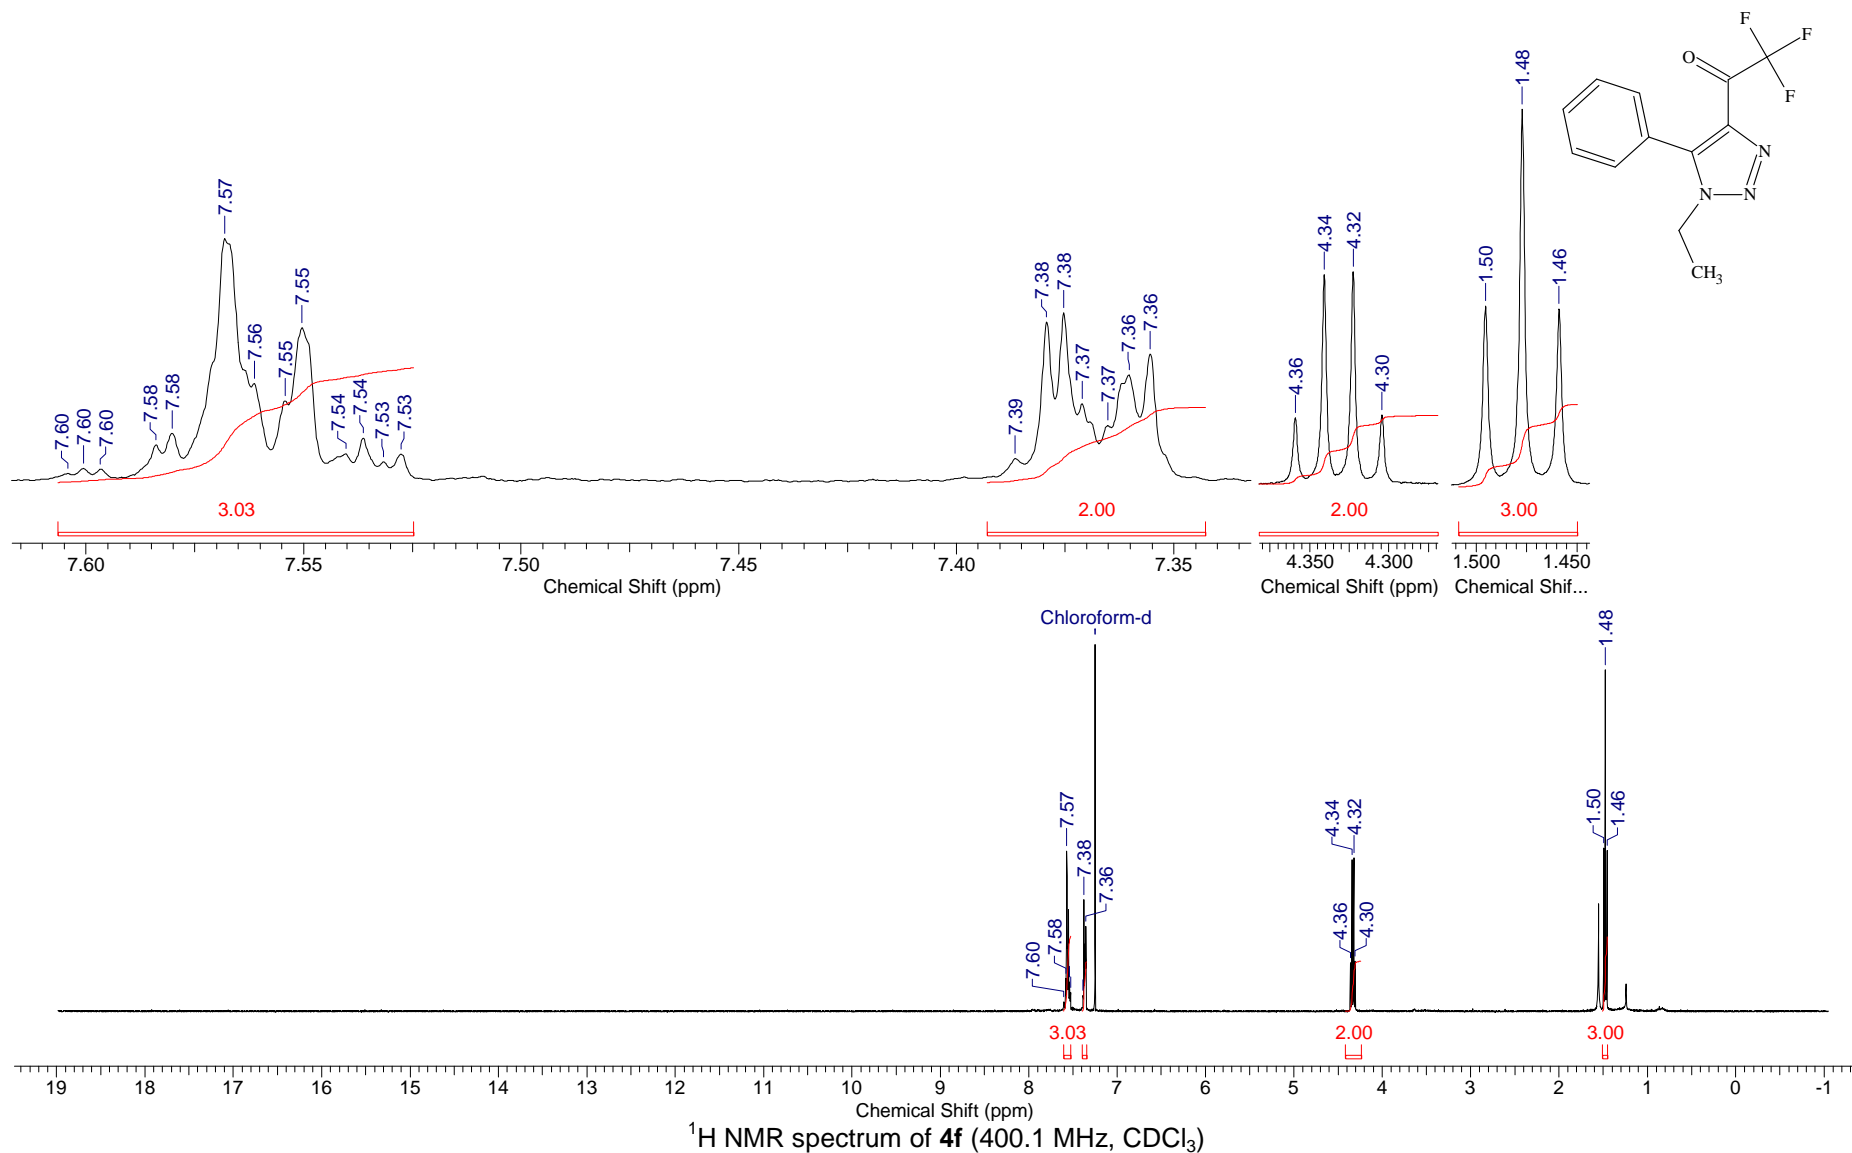

|                               |                                                       |                             |                      |                              |                      |
|-------------------------------|-------------------------------------------------------|-----------------------------|----------------------|------------------------------|----------------------|
| <b>Acquisition Time (sec)</b> | 1.7433                                                | <b>Comment</b>              | Imported from UXNMR. | <b>Date</b>                  | 05 Apr 2022 15:28:58 |
| <b>File Name</b>              | C:\DOCS\OUTPUT_301\2022\04.апрель\BM-2478-2.F_005001r | <b>Frequency (MHz)</b>      | 376.50               |                              |                      |
| <b>Nucleus</b>                | <sup>19</sup> F                                       | <b>Number of Transients</b> | 4                    | <b>Original Points Count</b> | 131072               |
| <b>Pulse Sequence</b>         | zgfgqn                                                | <b>Points Count</b>         | 262144               | <b>Sweep Width (Hz)</b>      | 75187.97             |
| <b>Temperature (degree C)</b> | 27.000                                                | <b>Solvent</b>              | CHLOROFORM-D         |                              |                      |

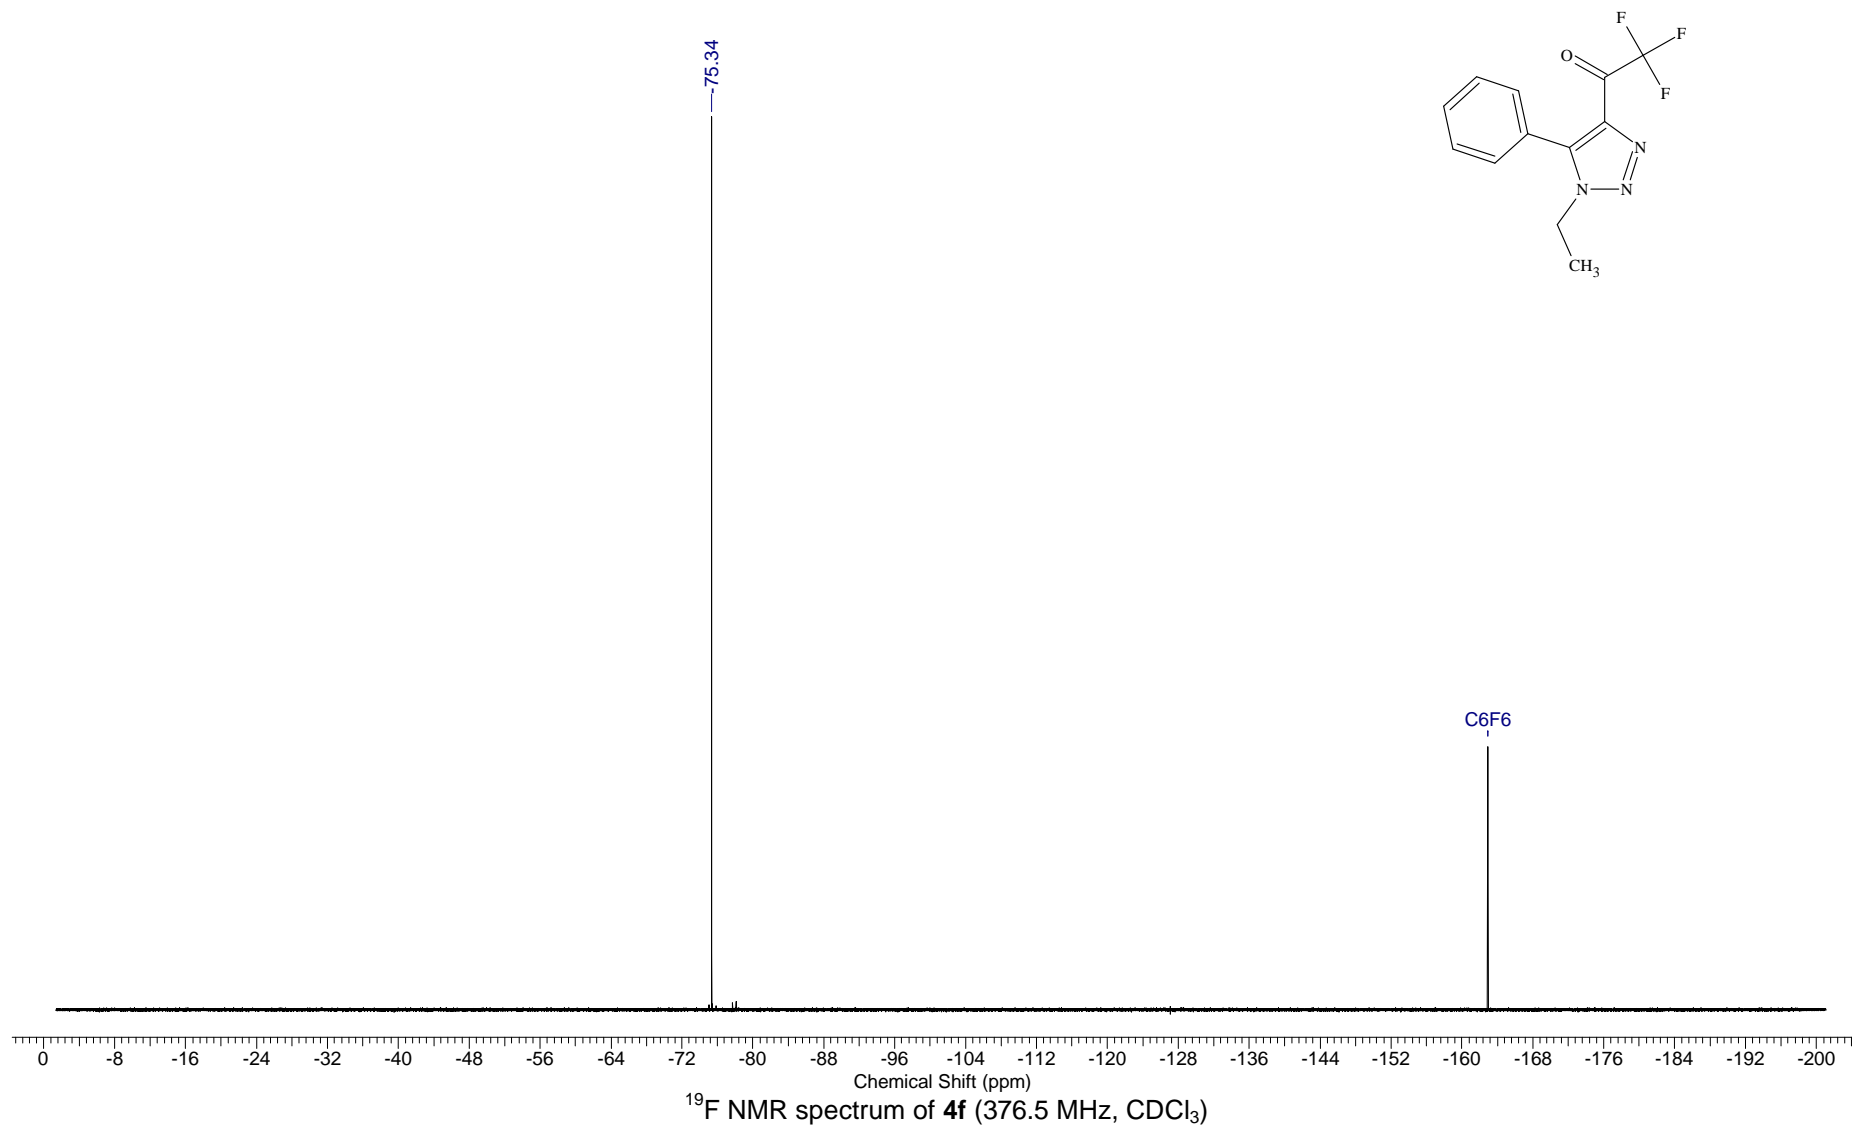

|                        |                                                          |                      |                      |                       |                  |                      |                        |        |
|------------------------|----------------------------------------------------------|----------------------|----------------------|-----------------------|------------------|----------------------|------------------------|--------|
| Acquisition Time (sec) | 4.0894                                                   | Comment              | Imported from UxNMR. |                       | Date             | 23 Mar 2022 17:38:50 |                        |        |
| File Name              | C:\DOCS\OUTPUT_301\2022\03.mapr\1SZA-BM-2458-4.H_001001r |                      |                      |                       | Frequency (MHz)  | 400.13               |                        |        |
| Nucleus                | 1H                                                       | Number of Transients | 4                    | Original Points Count | 32768            | Points Count         | 131072                 |        |
| Pulse Sequence         | zg30                                                     | Solvent              | BENZENE-D6           |                       | Sweep Width (Hz) | 8012.82              | Temperature (degree C) | 27.000 |

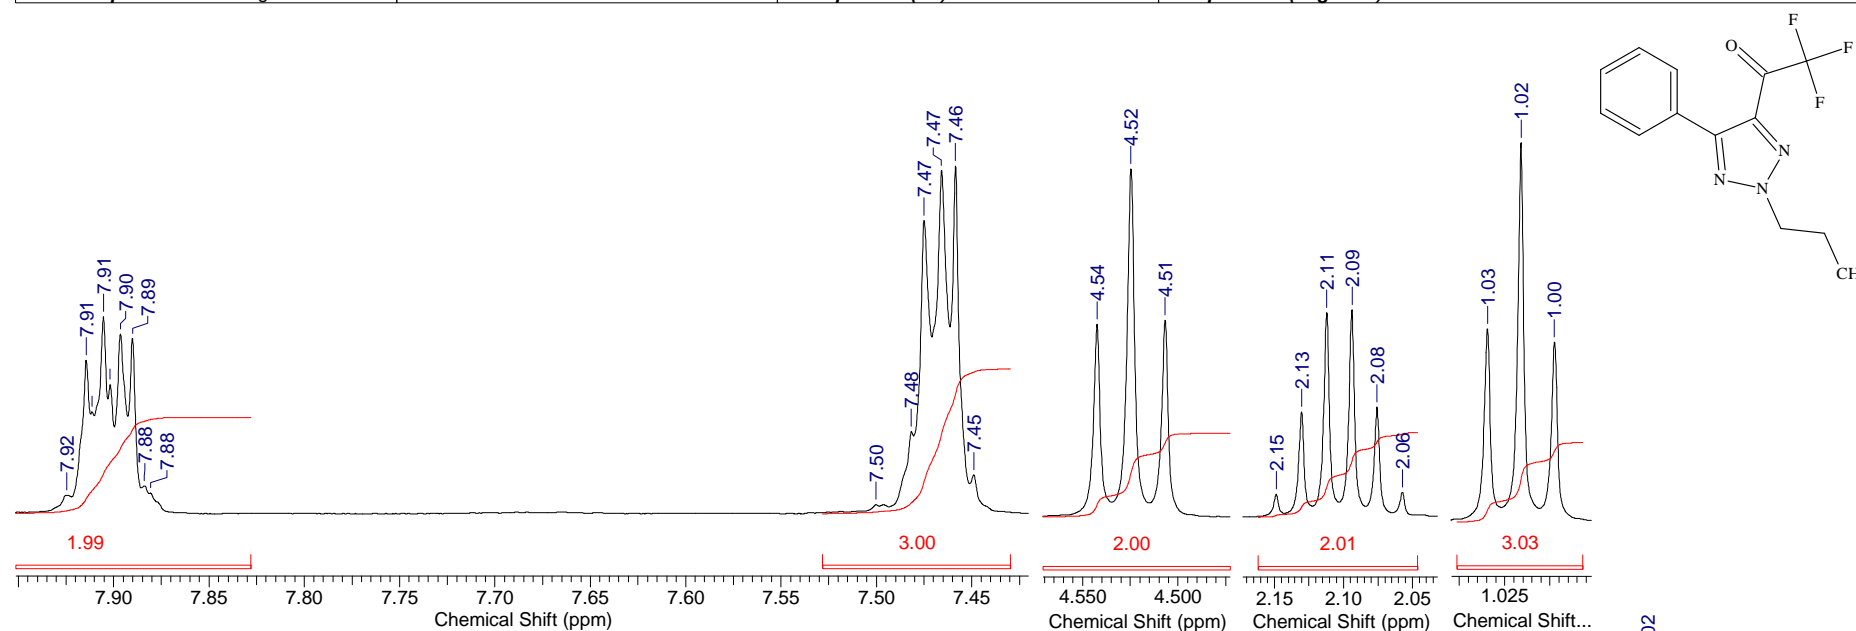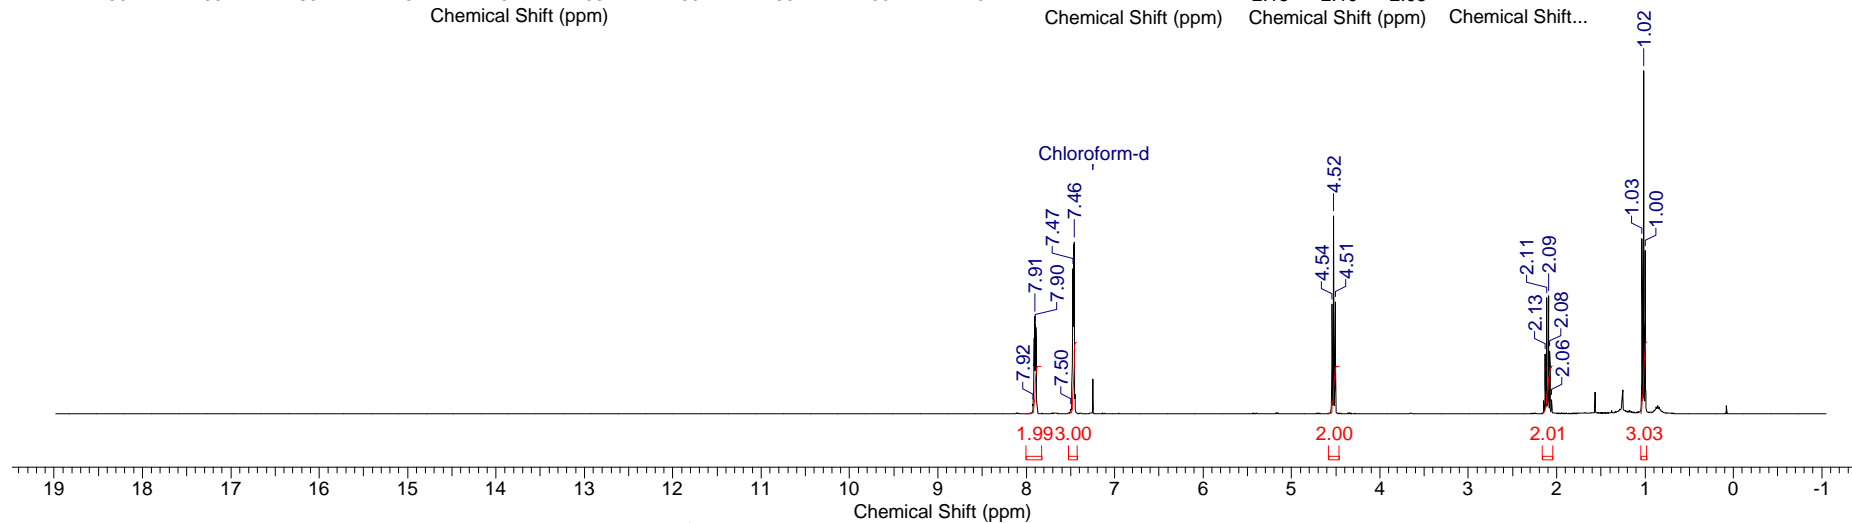<sup>1</sup>H NMR spectrum of **3g** (400.1 MHz, CDCl<sub>3</sub>)

|                               |                                                         |                             |                      |                              |                      |
|-------------------------------|---------------------------------------------------------|-----------------------------|----------------------|------------------------------|----------------------|
| <b>Acquisition Time (sec)</b> | 1.7433                                                  | <b>Comment</b>              | Imported from UXNMR. | <b>Date</b>                  | 23 Mar 2022 17:43:32 |
| <b>File Name</b>              | C:\DOCS\OUTPUT_301\2022\03.mapr\SZA-BM-2458-4.F_005001r | <b>Frequency (MHz)</b>      | 376.50               |                              |                      |
| <b>Nucleus</b>                | <sup>19</sup> F                                         | <b>Number of Transients</b> | 16                   | <b>Original Points Count</b> | 131072               |
| <b>Pulse Sequence</b>         | zgfgqn                                                  | <b>Points Count</b>         | 262144               |                              |                      |
| <b>Temperature (degree C)</b> | 27.000                                                  | <b>Solvent</b>              | CHLOROFORM-D         | <b>Sweep Width (Hz)</b>      | 75187.97             |

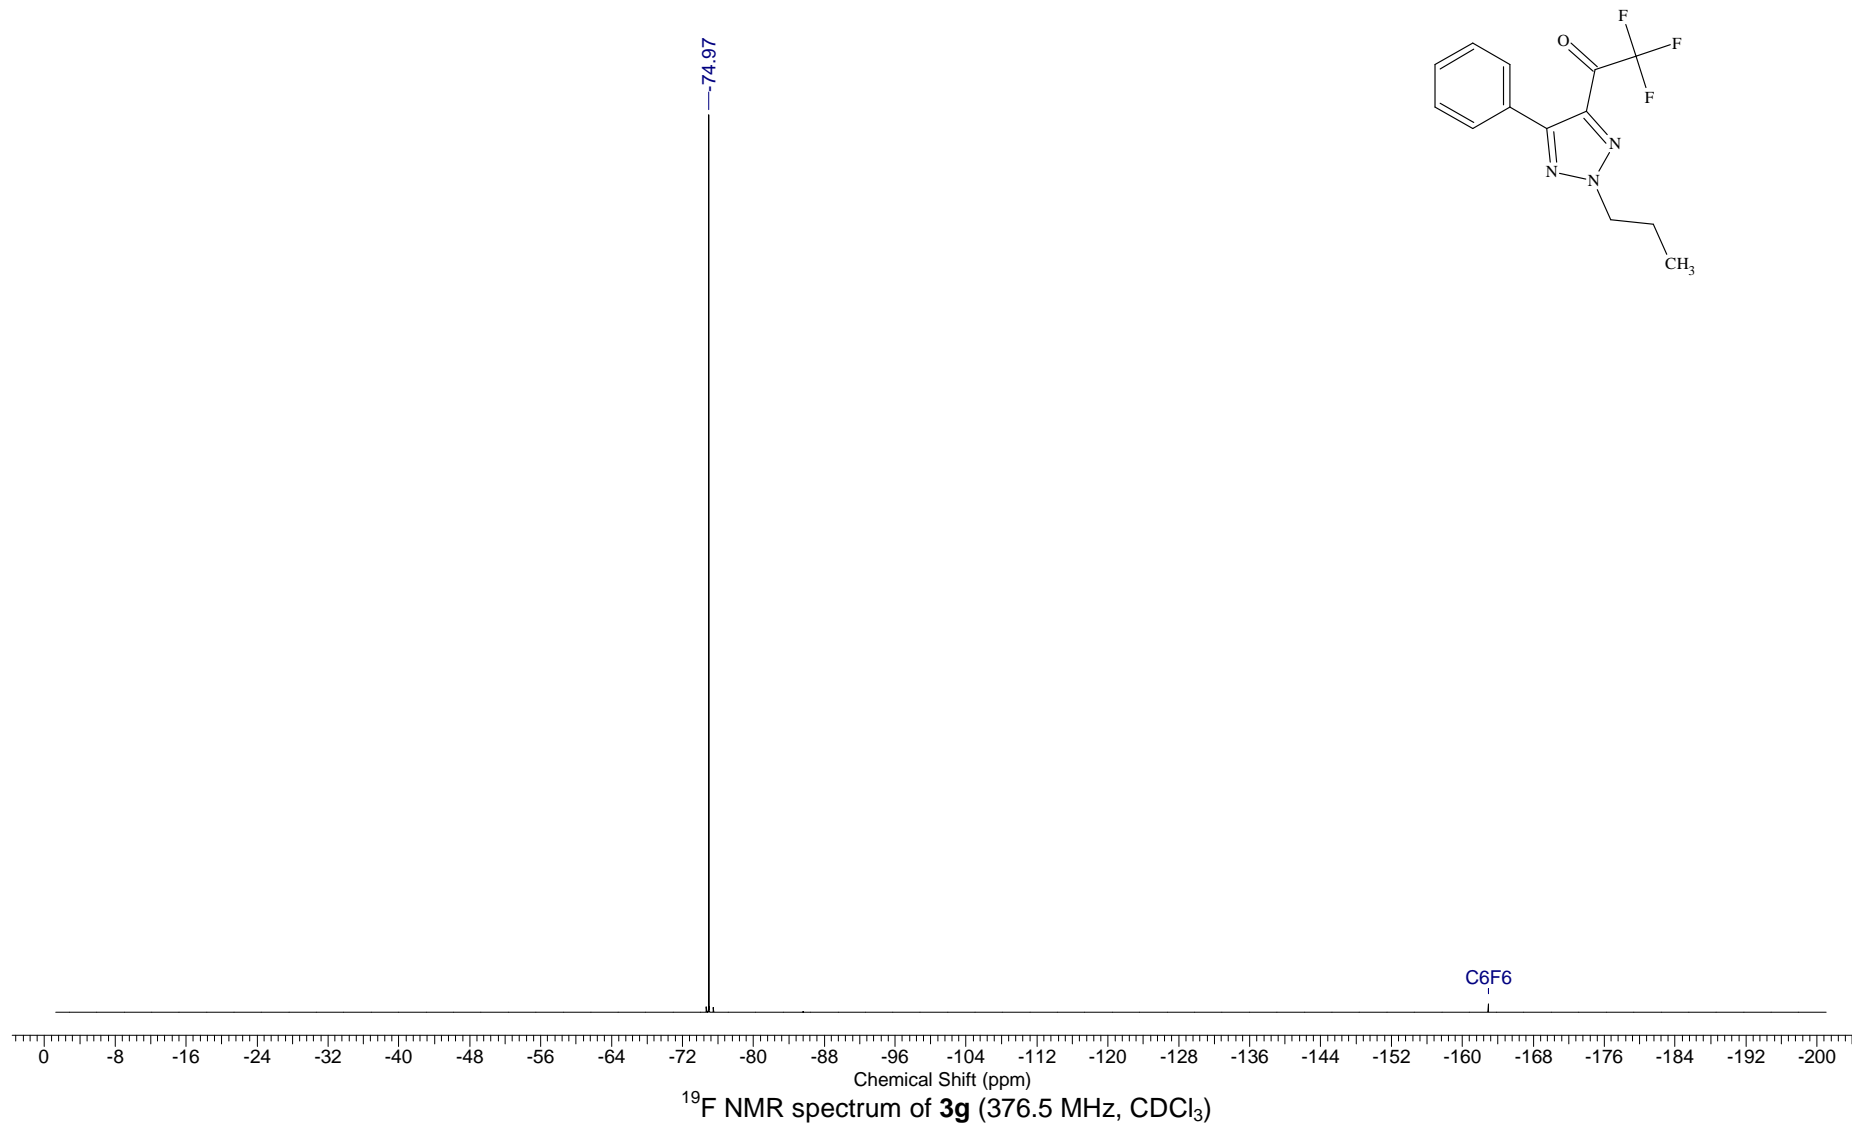

|                        |                                                        |                      |                      |                       |                 |                        |        |
|------------------------|--------------------------------------------------------|----------------------|----------------------|-----------------------|-----------------|------------------------|--------|
| Acquisition Time (sec) | 0.6783                                                 | Comment              | Imported from UXNMR. |                       | Date            | 24 Mar 2022 12:35:36   |        |
| File Name              | C:\DOCS\OUTPUT_301\2022\03.mapr\SA-BM-2458-4.C_002001r |                      |                      |                       | Frequency (MHz) | 100.61                 |        |
| Nucleus                | 13C                                                    | Number of Transients | 121                  | Original Points Count | 16384           | Points Count           | 131072 |
| Pulse Sequence         | zgpg30                                                 | Solvent              | DMSO-D6              | Sweep Width (Hz)      | 24154.59        | Temperature (degree C) | 27.000 |

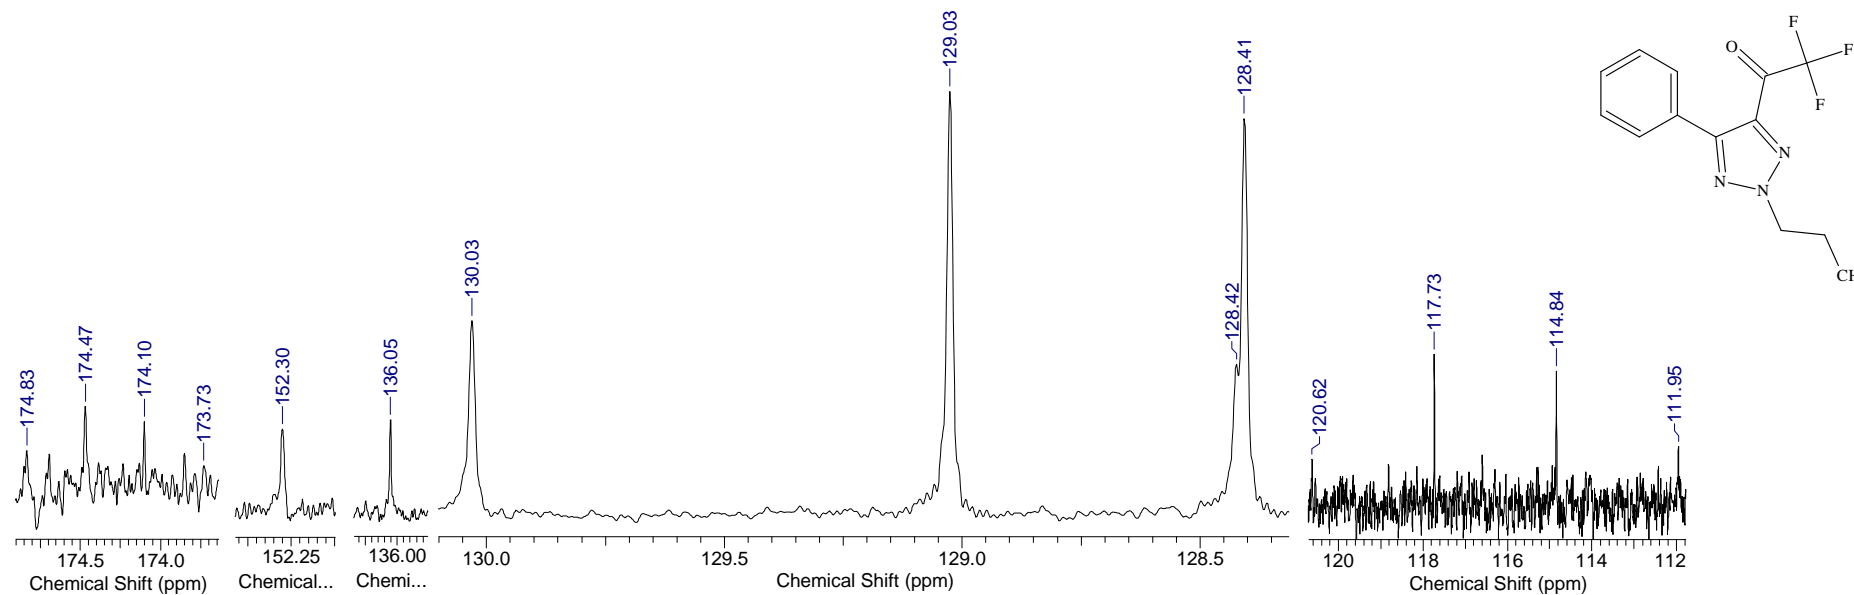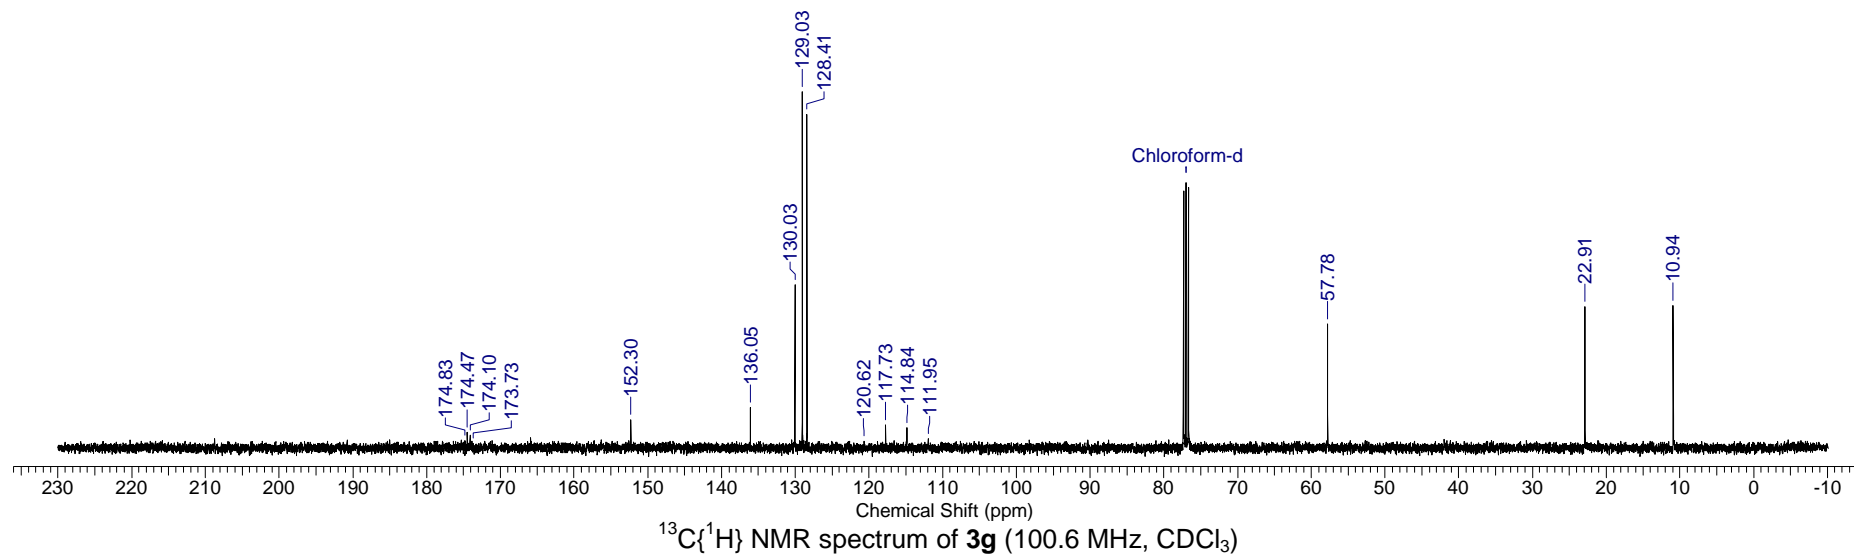

|                               |                                                       |                             |                      |                              |                         |                      |        |
|-------------------------------|-------------------------------------------------------|-----------------------------|----------------------|------------------------------|-------------------------|----------------------|--------|
| <b>Acquisition Time (sec)</b> | 4.0894                                                | <b>Comment</b>              | Imported from UXNMR. |                              | <b>Date</b>             | 21 Mar 2022 15:26:36 |        |
| <b>File Name</b>              | C:\DOCS\OUTPUT_301\2022\03.mapr\SAZ-BM-2458.H_001001r |                             |                      |                              | <b>Frequency (MHz)</b>  | 400.13               |        |
| <b>Nucleus</b>                | 1H                                                    | <b>Number of Transients</b> | 4                    | <b>Original Points Count</b> | 32768                   | <b>Points Count</b>  | 131072 |
| <b>Pulse Sequence</b>         | zg30                                                  | <b>Solvent</b>              | CHLOROFORM-D         |                              | <b>Sweep Width (Hz)</b> | 8012.82              |        |
| <b>Temperature (degree C)</b> | 27.000                                                |                             |                      |                              |                         |                      |        |

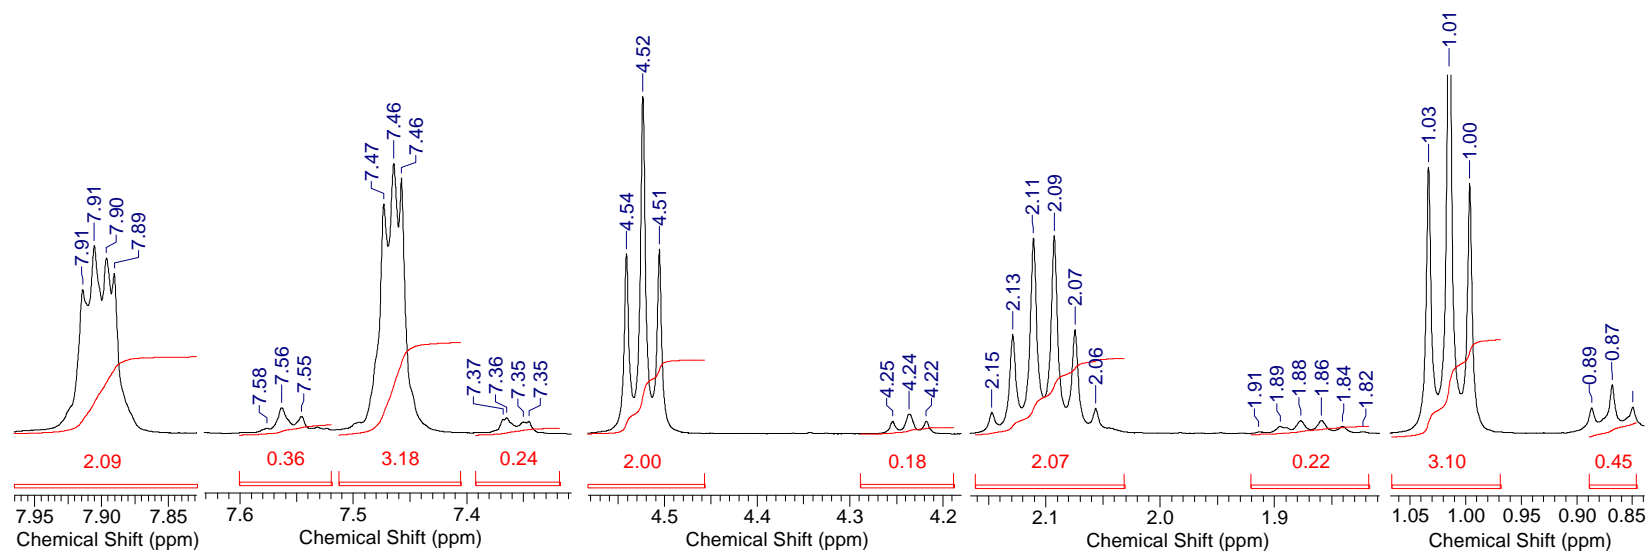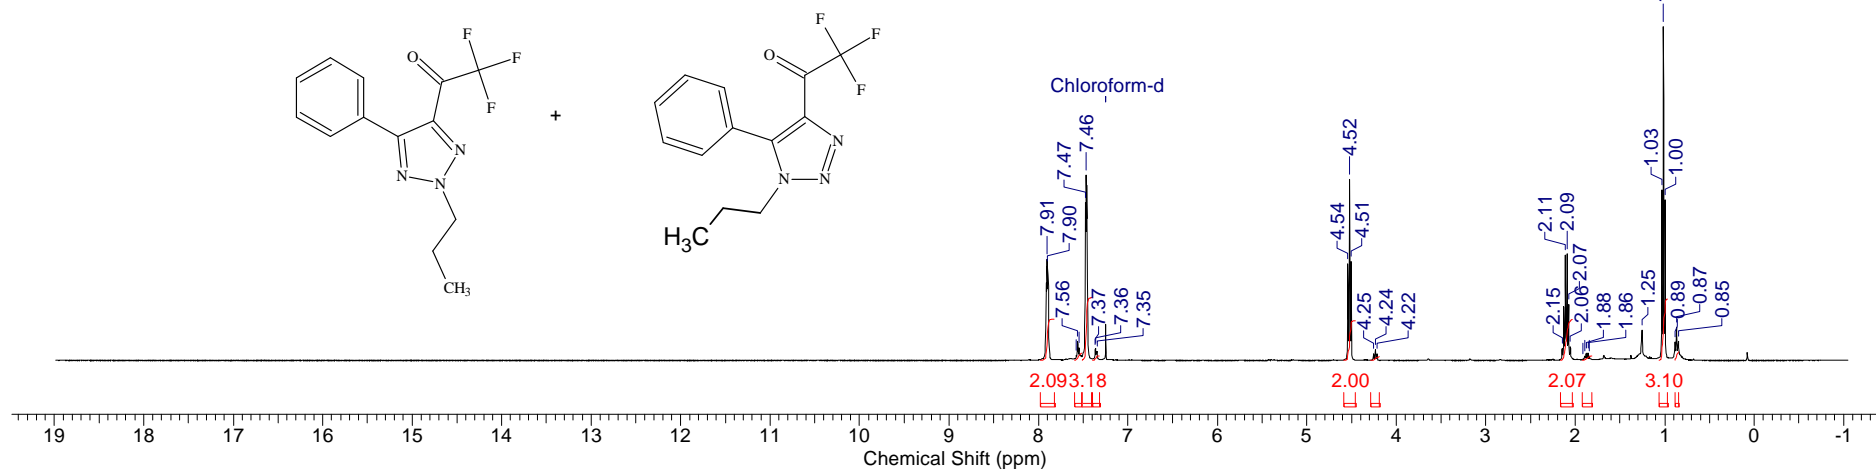<sup>1</sup>H NMR spectrum of mixture of **3g** and **4g** (400.1 MHz, CDCl<sub>3</sub>)

|                        |                                                       |                      |                      |                       |        |                  |                      |
|------------------------|-------------------------------------------------------|----------------------|----------------------|-----------------------|--------|------------------|----------------------|
| Acquisition Time (sec) | 1.7433                                                | Comment              | Imported from UXNMR. |                       |        | Date             | 21 Mar 2022 15:38:44 |
| File Name              | C:\DOCS\OUTPUT_301\2022\03.map\1\SA-BM-2458.F_005001r |                      |                      |                       |        | Frequency (MHz)  | 376.50               |
| Nucleus                | 19F                                                   | Number of Transients | 16                   | Original Points Count | 131072 | Points Count     | 262144               |
| Pulse Sequence         | zgfglqn                                               | Solvent              | CHLOROFORM-D         |                       |        | Sweep Width (Hz) | 75187.97             |
| Temperature (degree C) | 27.000                                                |                      |                      |                       |        |                  |                      |

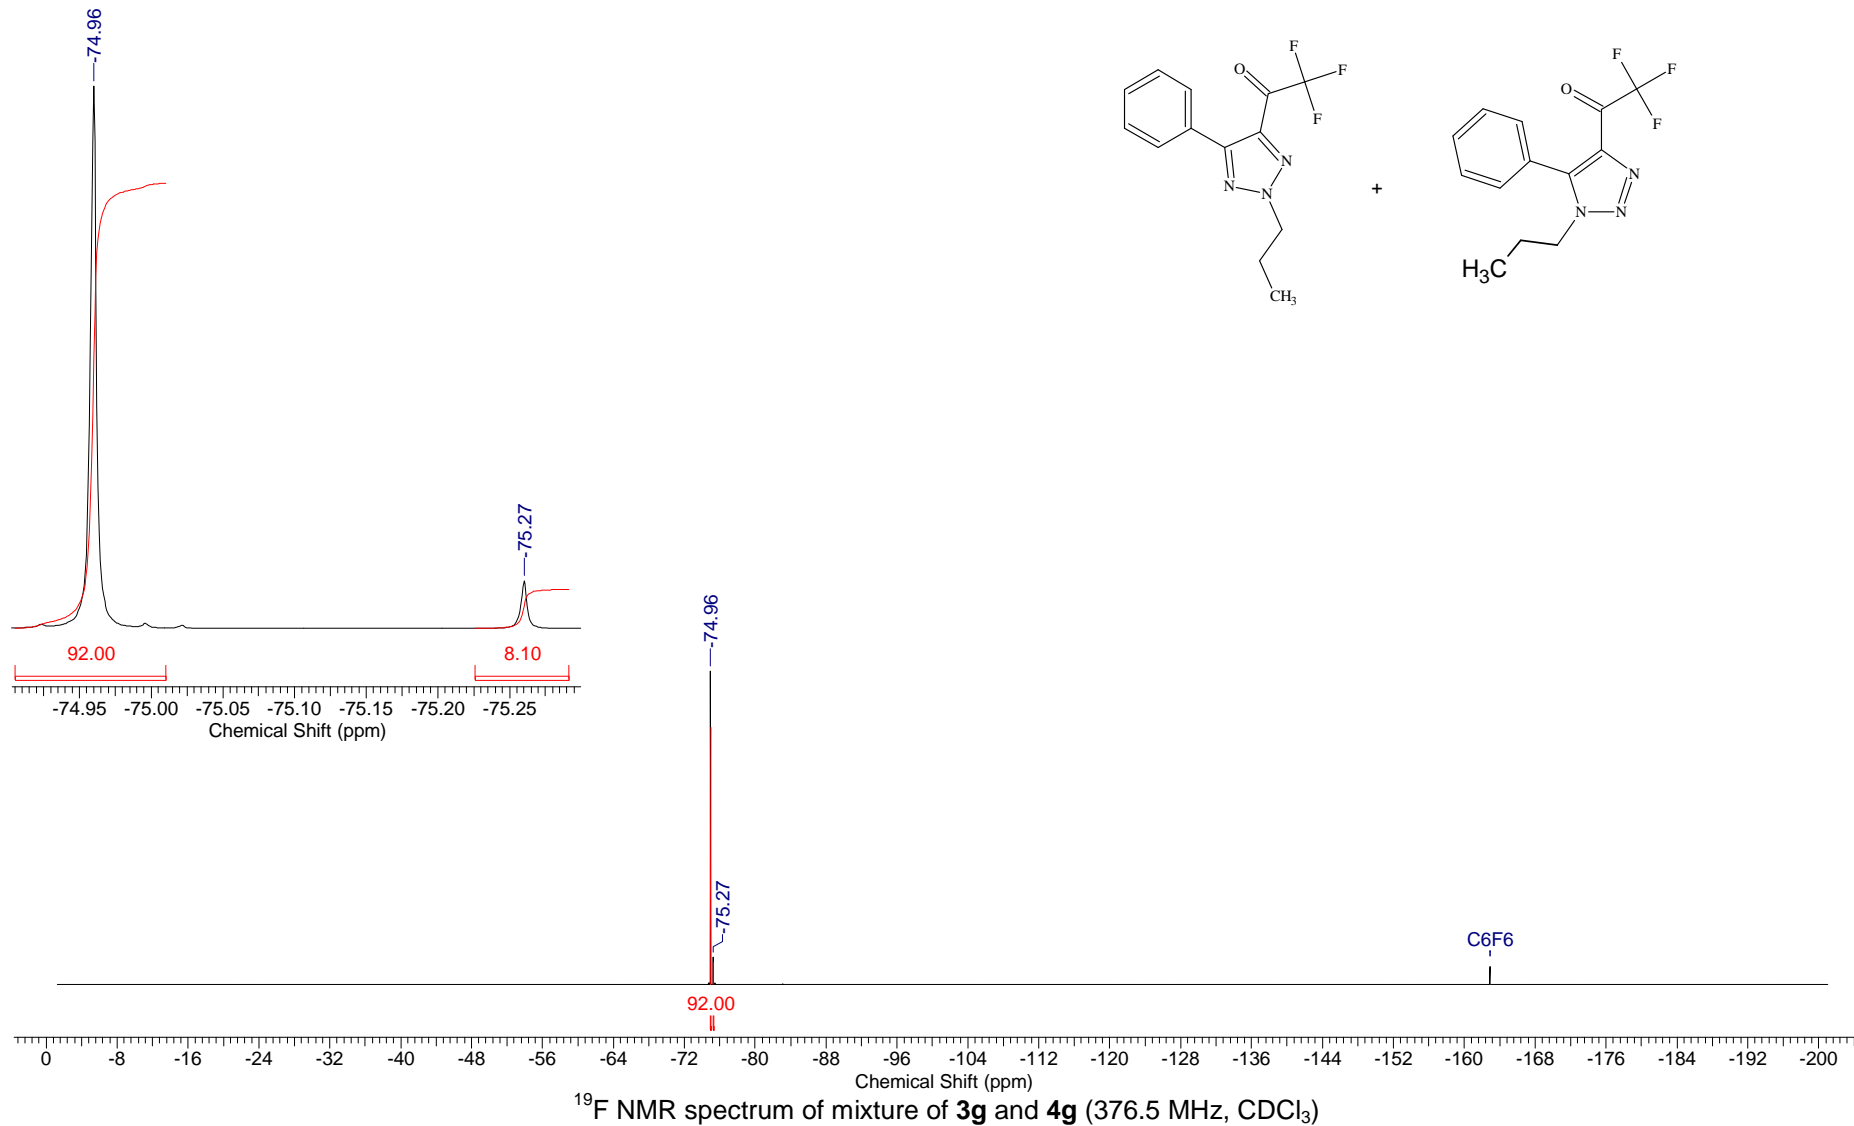

|                        |                                                      |                      |                      |                       |          |                        |                      |
|------------------------|------------------------------------------------------|----------------------|----------------------|-----------------------|----------|------------------------|----------------------|
| Acquisition Time (sec) | 0.6783                                               | Comment              | Imported from UXNMR. |                       |          | Date                   | 22 Mar 2022 14:03:50 |
| File Name              | C:\DOCS\OUTPUT_301\2022\03.mapr\SA-BM-2458.C_002001r |                      |                      |                       |          | Frequency (MHz)        | 100.61               |
| Nucleus                | 13C                                                  | Number of Transients | 2145                 | Original Points Count | 16384    | Points Count           | 131072               |
| Pulse Sequence         | zgpg30                                               | Solvent              | DMSO-D6              | Sweep Width (Hz)      | 24154.59 | Temperature (degree C) | 27.000               |

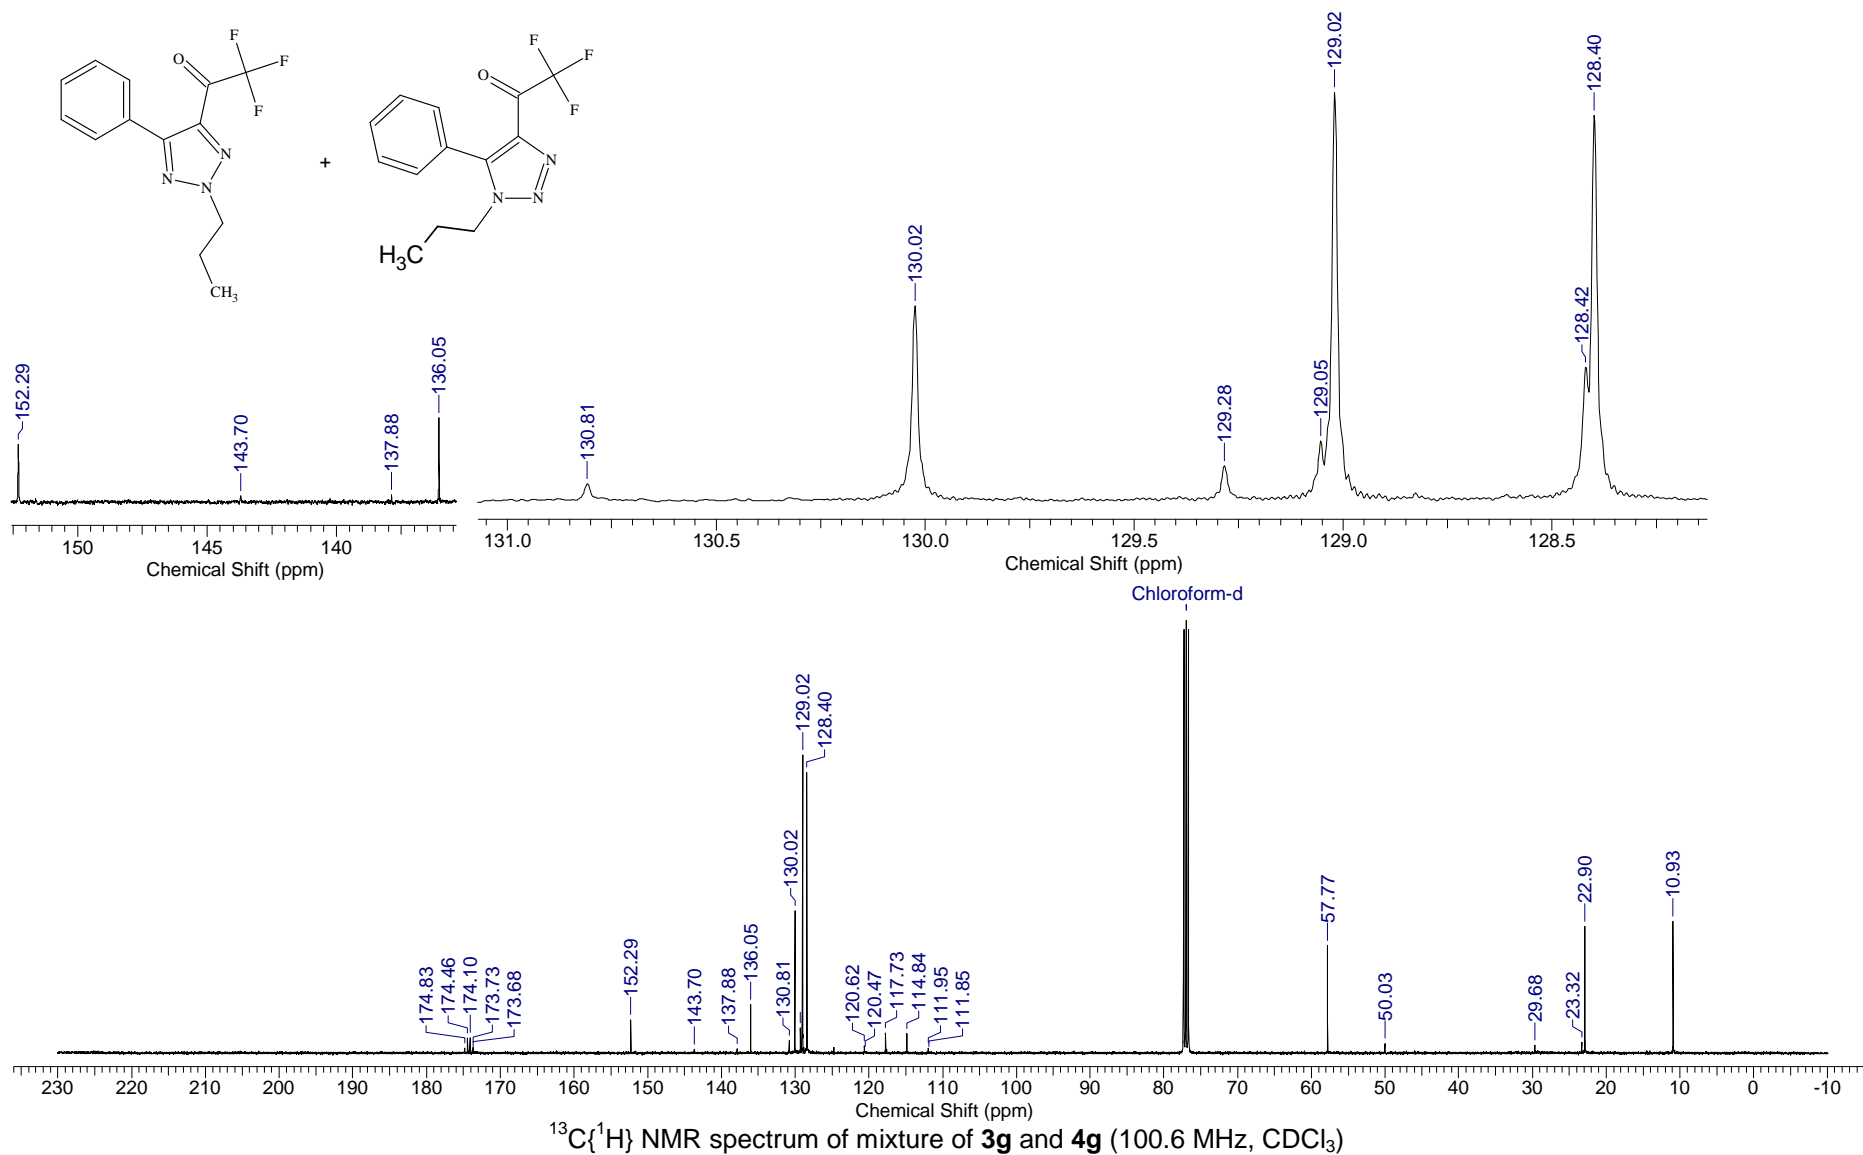



|                        |                                                        |                      |                      |                       |                 |                        |        |
|------------------------|--------------------------------------------------------|----------------------|----------------------|-----------------------|-----------------|------------------------|--------|
| Acquisition Time (sec) | 0.6783                                                 | Comment              | Imported from UXNMR. |                       | Date            | 22 Mar 2022 14:03:50   |        |
| File Name              | C:\DOCS\OUTPUT_301\2022\03.mapr\1SZA-BM-2458.C_002001r |                      |                      |                       | Frequency (MHz) | 100.61                 |        |
| Nucleus                | 13C                                                    | Number of Transients | 2145                 | Original Points Count | 16384           | Points Count           | 131072 |
| Pulse Sequence         | zgpg30                                                 | Solvent              | DMSO-D6              | Sweep Width (Hz)      | 24154.59        | Temperature (degree C) | 27.000 |

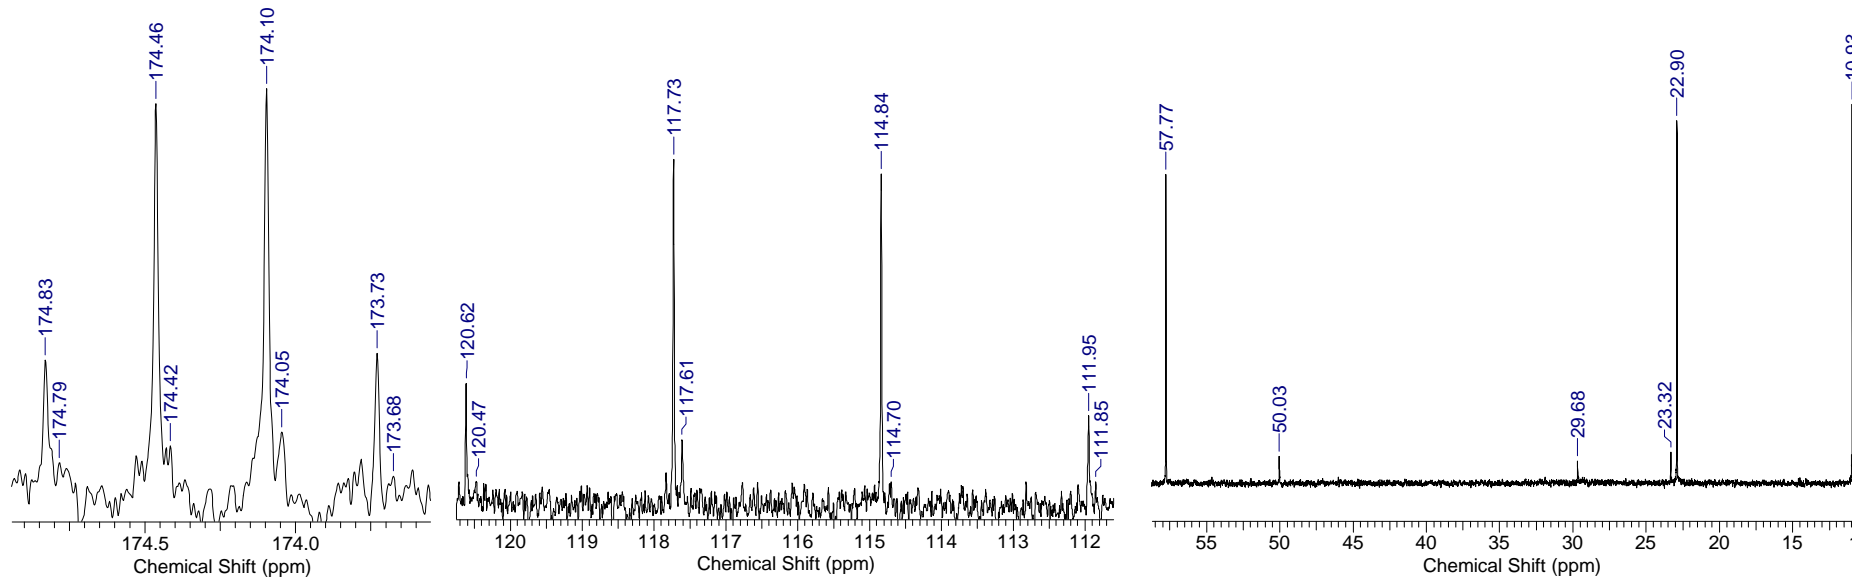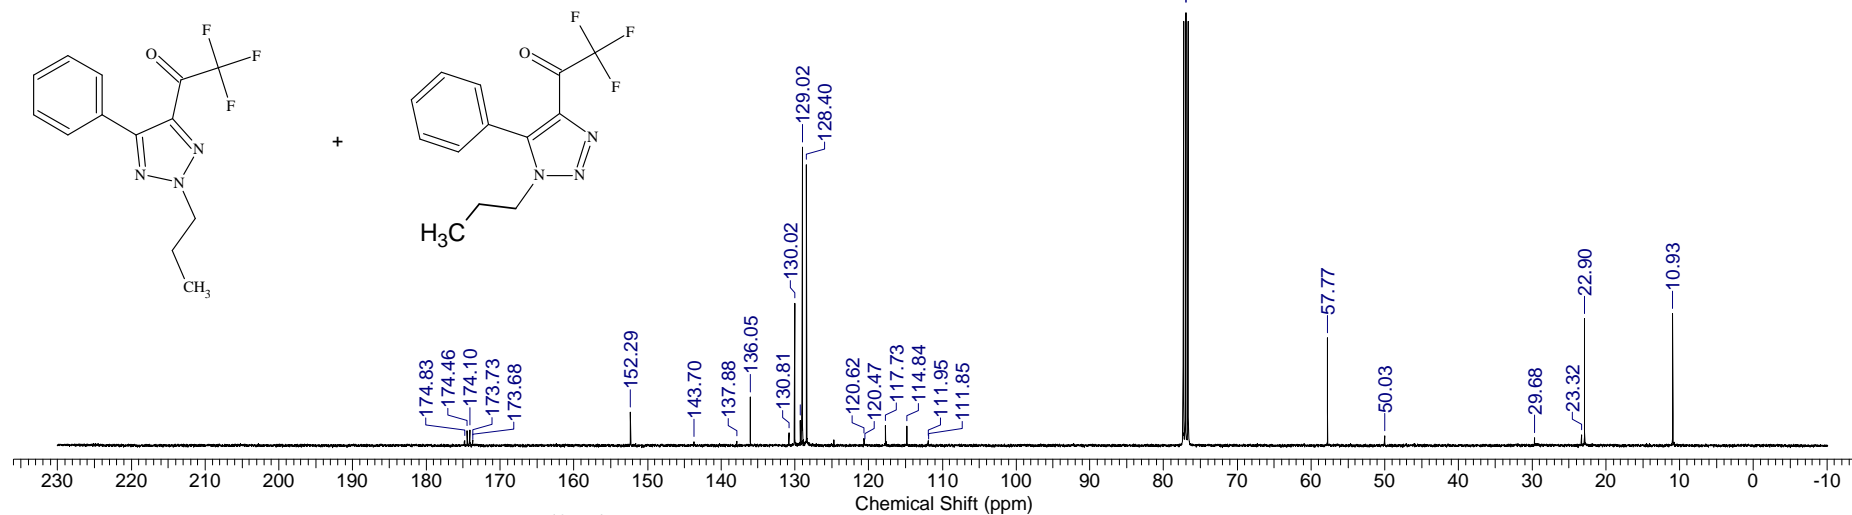

<sup>13</sup>C{<sup>1</sup>H} NMR spectrum of mixture of **3g** and **4g** (100.6 MHz, CDCl<sub>3</sub>)

|                        |                                                       |                      |                      |                       |                 |                        |        |
|------------------------|-------------------------------------------------------|----------------------|----------------------|-----------------------|-----------------|------------------------|--------|
| Acquisition Time (sec) | 4.0894                                                | Comment              | Imported from UXMNR. |                       | Date            | 05 Apr 2022 15:05:28   |        |
| File Name              | C:\DOCS\OUTPUT_301\2022\04.апрель\BM-2479-1.H_001001r |                      |                      |                       | Frequency (MHz) | 400.13                 |        |
| Nucleus                | 1H                                                    | Number of Transients | 4                    | Original Points Count | 32768           | Points Count           | 131072 |
| Pulse Sequence         | zg30                                                  | Solvent              | BENZENE-D6           | Sweep Width (Hz)      | 8012.82         | Temperature (degree C) | 27.000 |

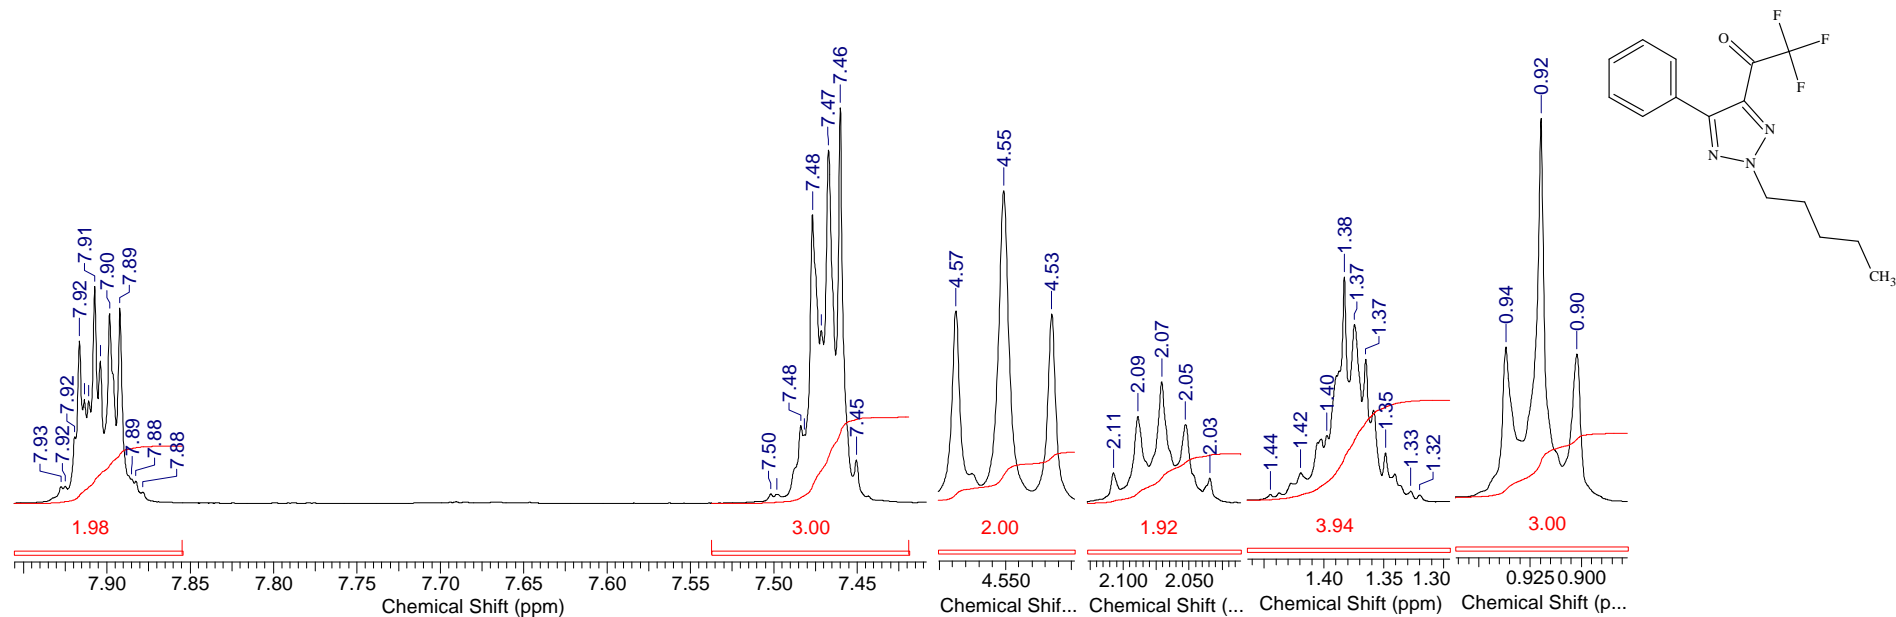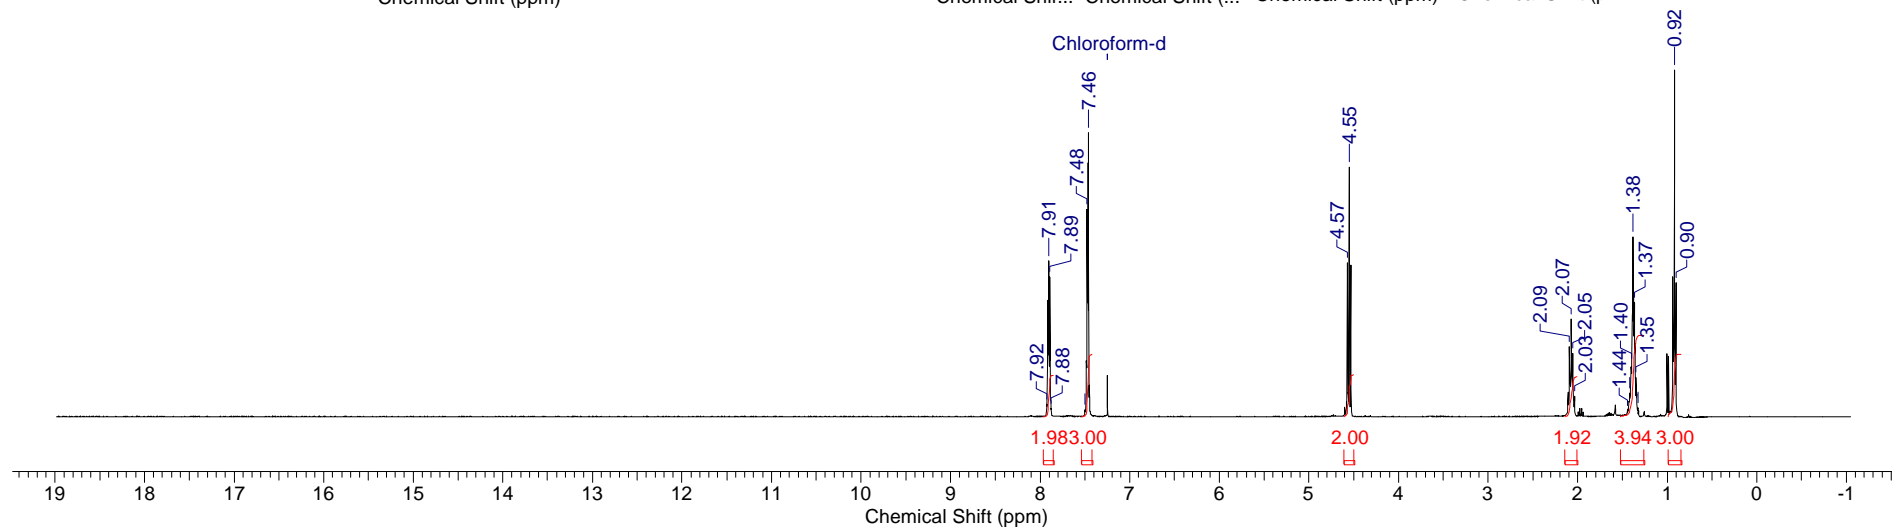<sup>1</sup>H NMR spectrum of **3h** (400.1 MHz, CDCl<sub>3</sub>)

|                               |                                                       |                             |                      |                              |                      |
|-------------------------------|-------------------------------------------------------|-----------------------------|----------------------|------------------------------|----------------------|
| <b>Acquisition Time (sec)</b> | 1.7433                                                | <b>Comment</b>              | Imported from UXMNR. | <b>Date</b>                  | 05 Apr 2022 15:17:16 |
| <b>File Name</b>              | C:\DOCS\OUTPUT_301\2022\04.апрель\BM-2479-1.F_005001r | <b>Frequency (MHz)</b>      | 376.50               | <b>Points Count</b>          | 262144               |
| <b>Nucleus</b>                | <sup>19</sup> F                                       | <b>Number of Transients</b> | 4                    | <b>Original Points Count</b> | 131072               |
| <b>Pulse Sequence</b>         | zgfgqn                                                | <b>Solvent</b>              | CHLOROFORM-D         | <b>Sweep Width (Hz)</b>      | 75187.97             |
| <b>Temperature (degree C)</b> | 27.000                                                |                             |                      |                              |                      |

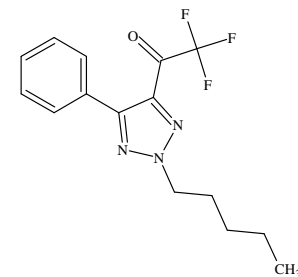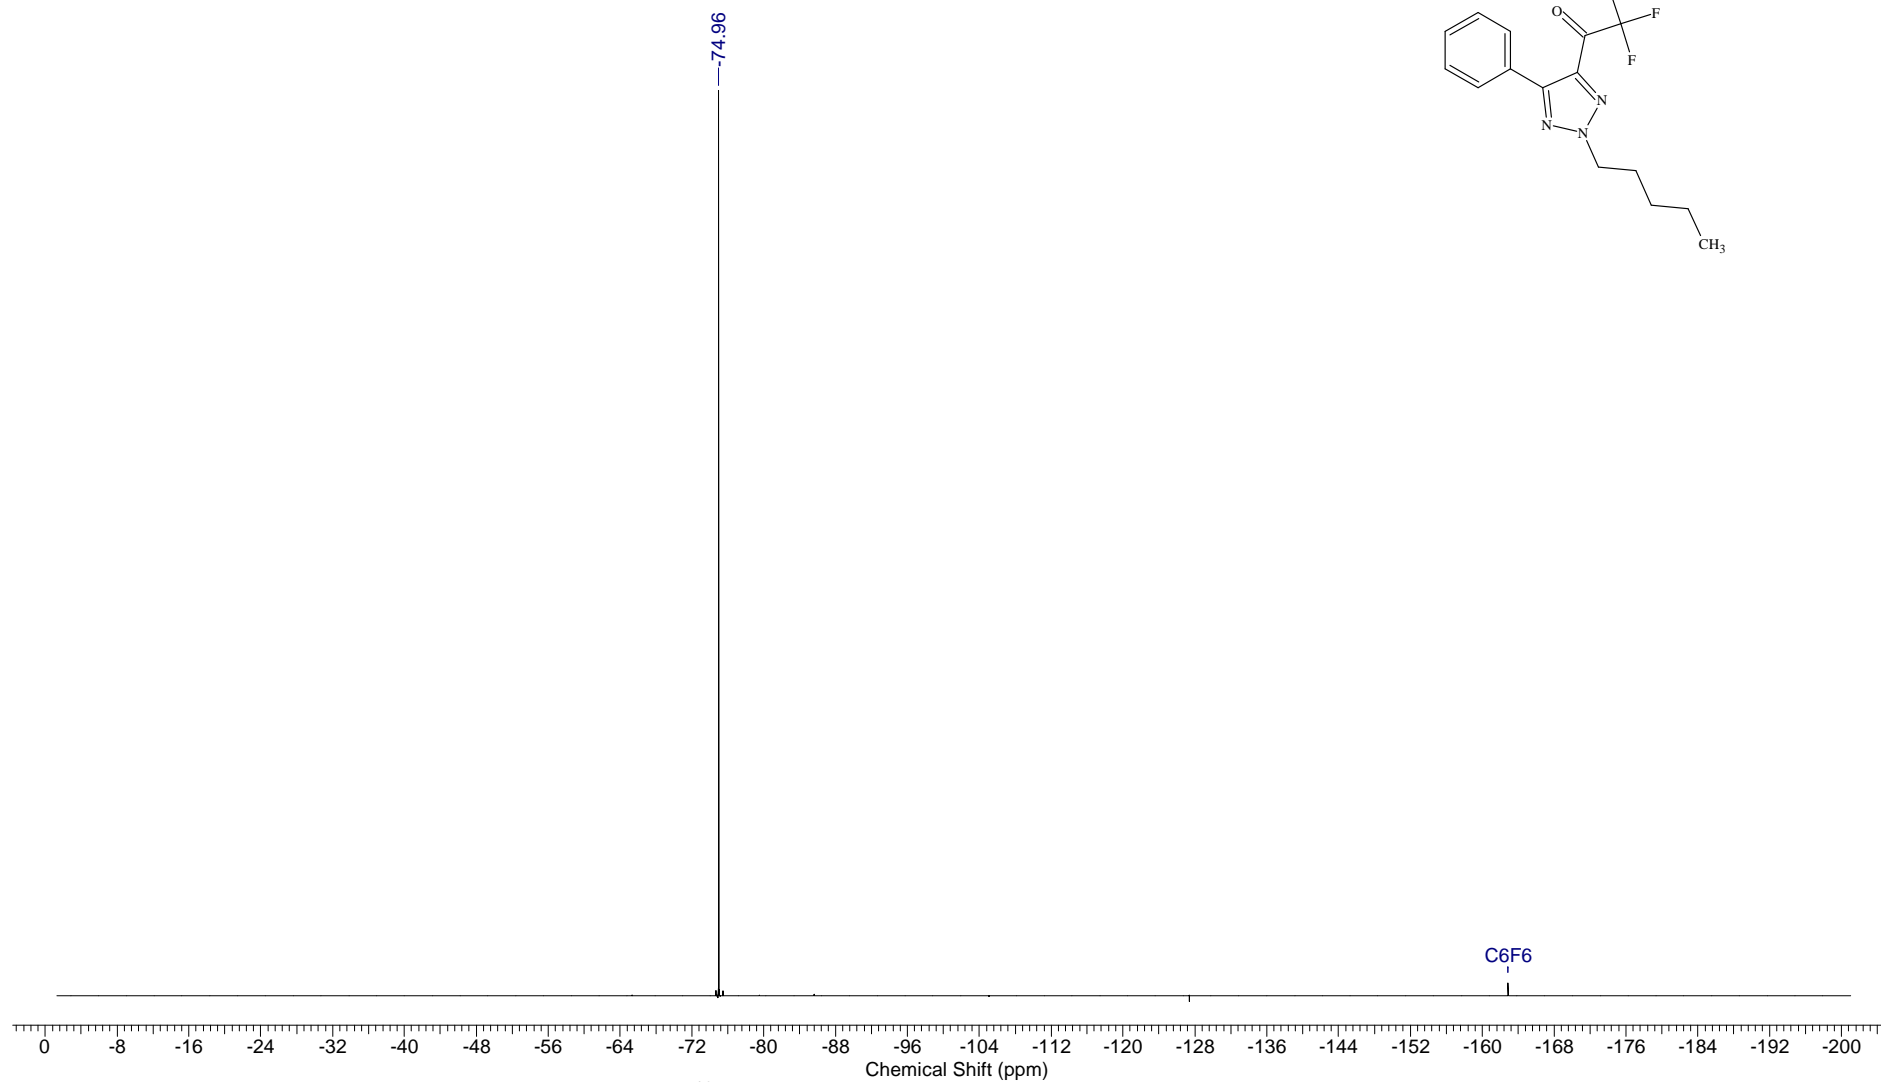

|                               |                                                       |                             |                      |                              |                      |
|-------------------------------|-------------------------------------------------------|-----------------------------|----------------------|------------------------------|----------------------|
| <b>Acquisition Time (sec)</b> | 0.6783                                                | <b>Comment</b>              | Imported from UXNMR. | <b>Date</b>                  | 05 Apr 2022 15:13:32 |
| <b>File Name</b>              | C:\DOCS\OUTPUT_301\2022\04.апрель\BM-2479-1.C_002001r | <b>Frequency (MHz)</b>      | 100.61               | <b>Points Count</b>          | 131072               |
| <b>Nucleus</b>                | <sup>13</sup> C                                       | <b>Number of Transients</b> | 193                  | <b>Original Points Count</b> | 16384                |
| <b>Pulse Sequence</b>         | zgpg30                                                | <b>Solvent</b>              | CHLOROFORM-D         | <b>Sweep Width (Hz)</b>      | 24154.59             |
| <b>Temperature (degree C)</b> | 27.000                                                |                             |                      |                              |                      |

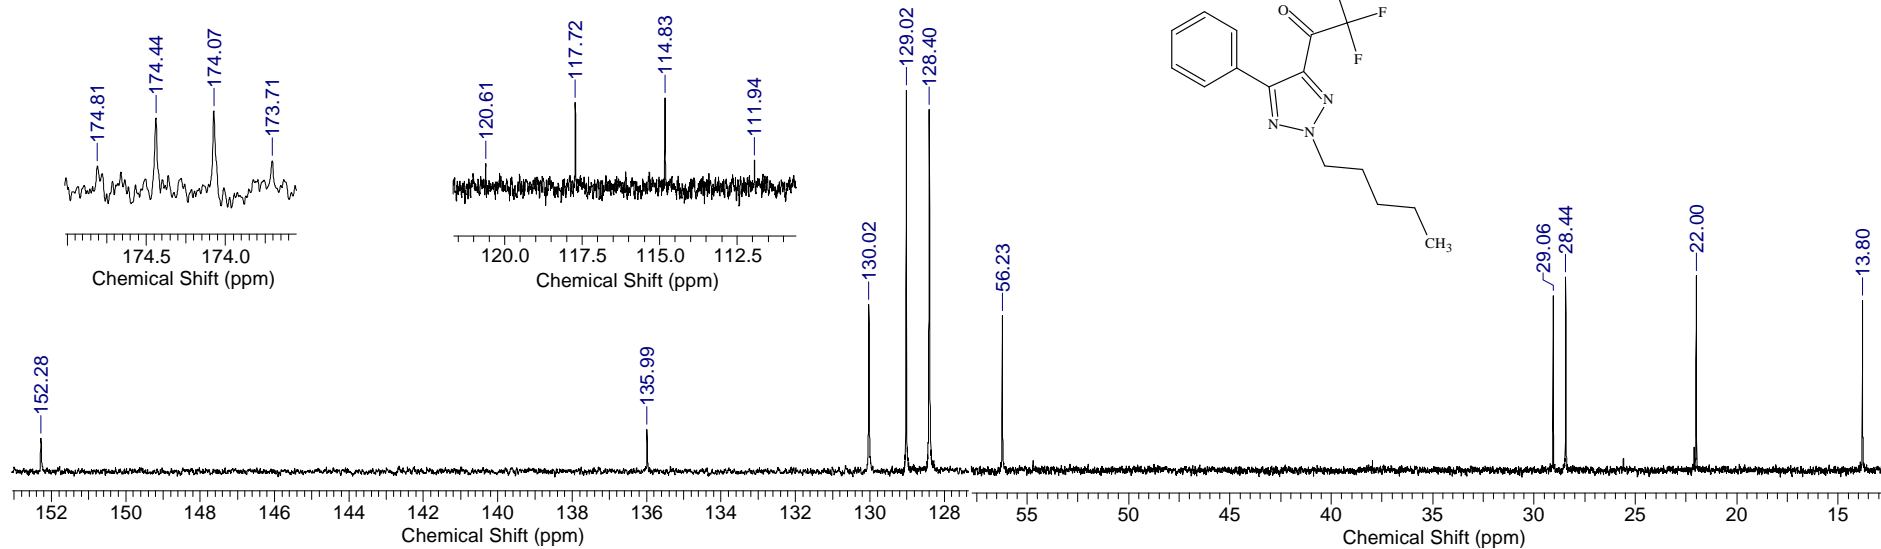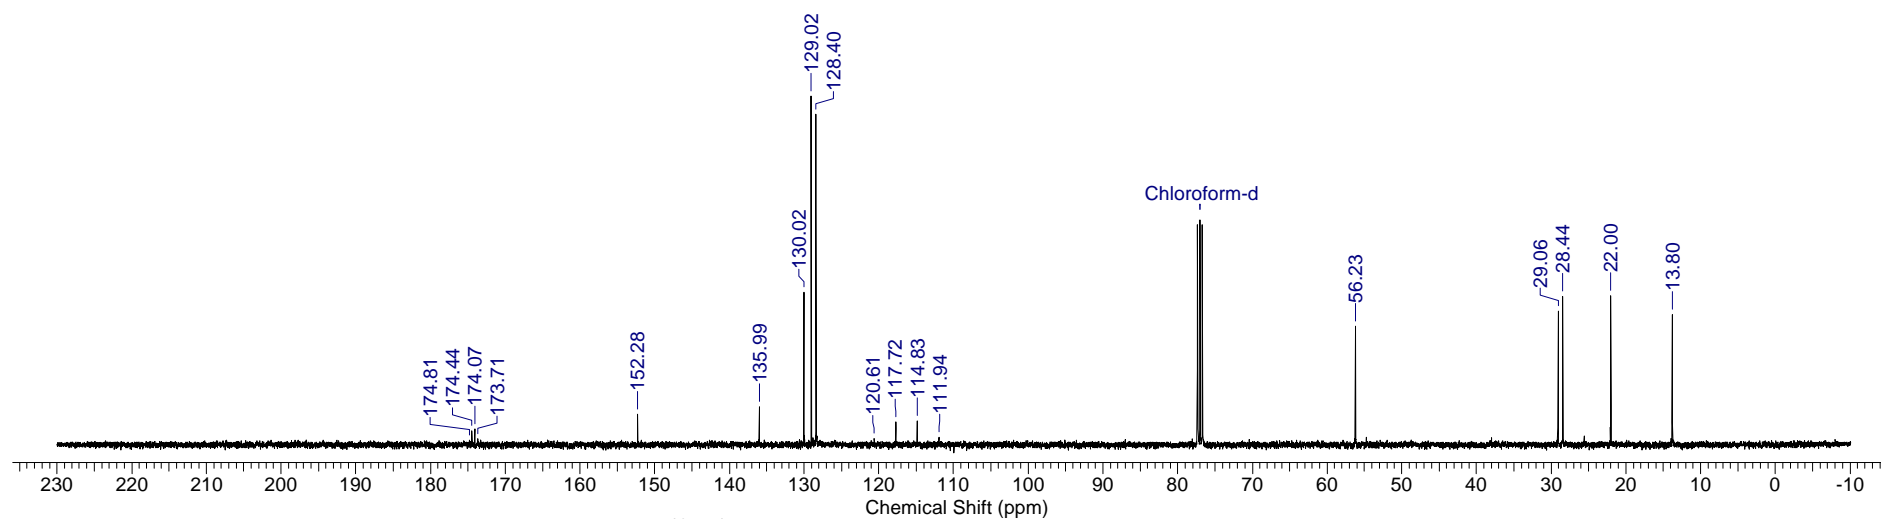<sup>13</sup>C{<sup>1</sup>H} NMR spectrum of **3h** (100.6 MHz, CDCl<sub>3</sub>)

|                        |                                                       |                      |                      |                       |                 |                        |        |
|------------------------|-------------------------------------------------------|----------------------|----------------------|-----------------------|-----------------|------------------------|--------|
| Acquisition Time (sec) | 4.0894                                                | Comment              | Imported from UXNMR. |                       | Date            | 05 Apr 2022 15:01:32   |        |
| File Name              | C:\DOCS\OUTPUT_301\2022\04.апрель\BM-2479-2.H_001001r |                      |                      |                       | Frequency (MHz) | 400.13                 |        |
| Nucleus                | 1H                                                    | Number of Transients | 4                    | Original Points Count | 32768           | Points Count           | 131072 |
| Pulse Sequence         | zg30                                                  | Solvent              | BENZENE-D6           | Sweep Width (Hz)      | 8012.82         | Temperature (degree C) | 27.000 |

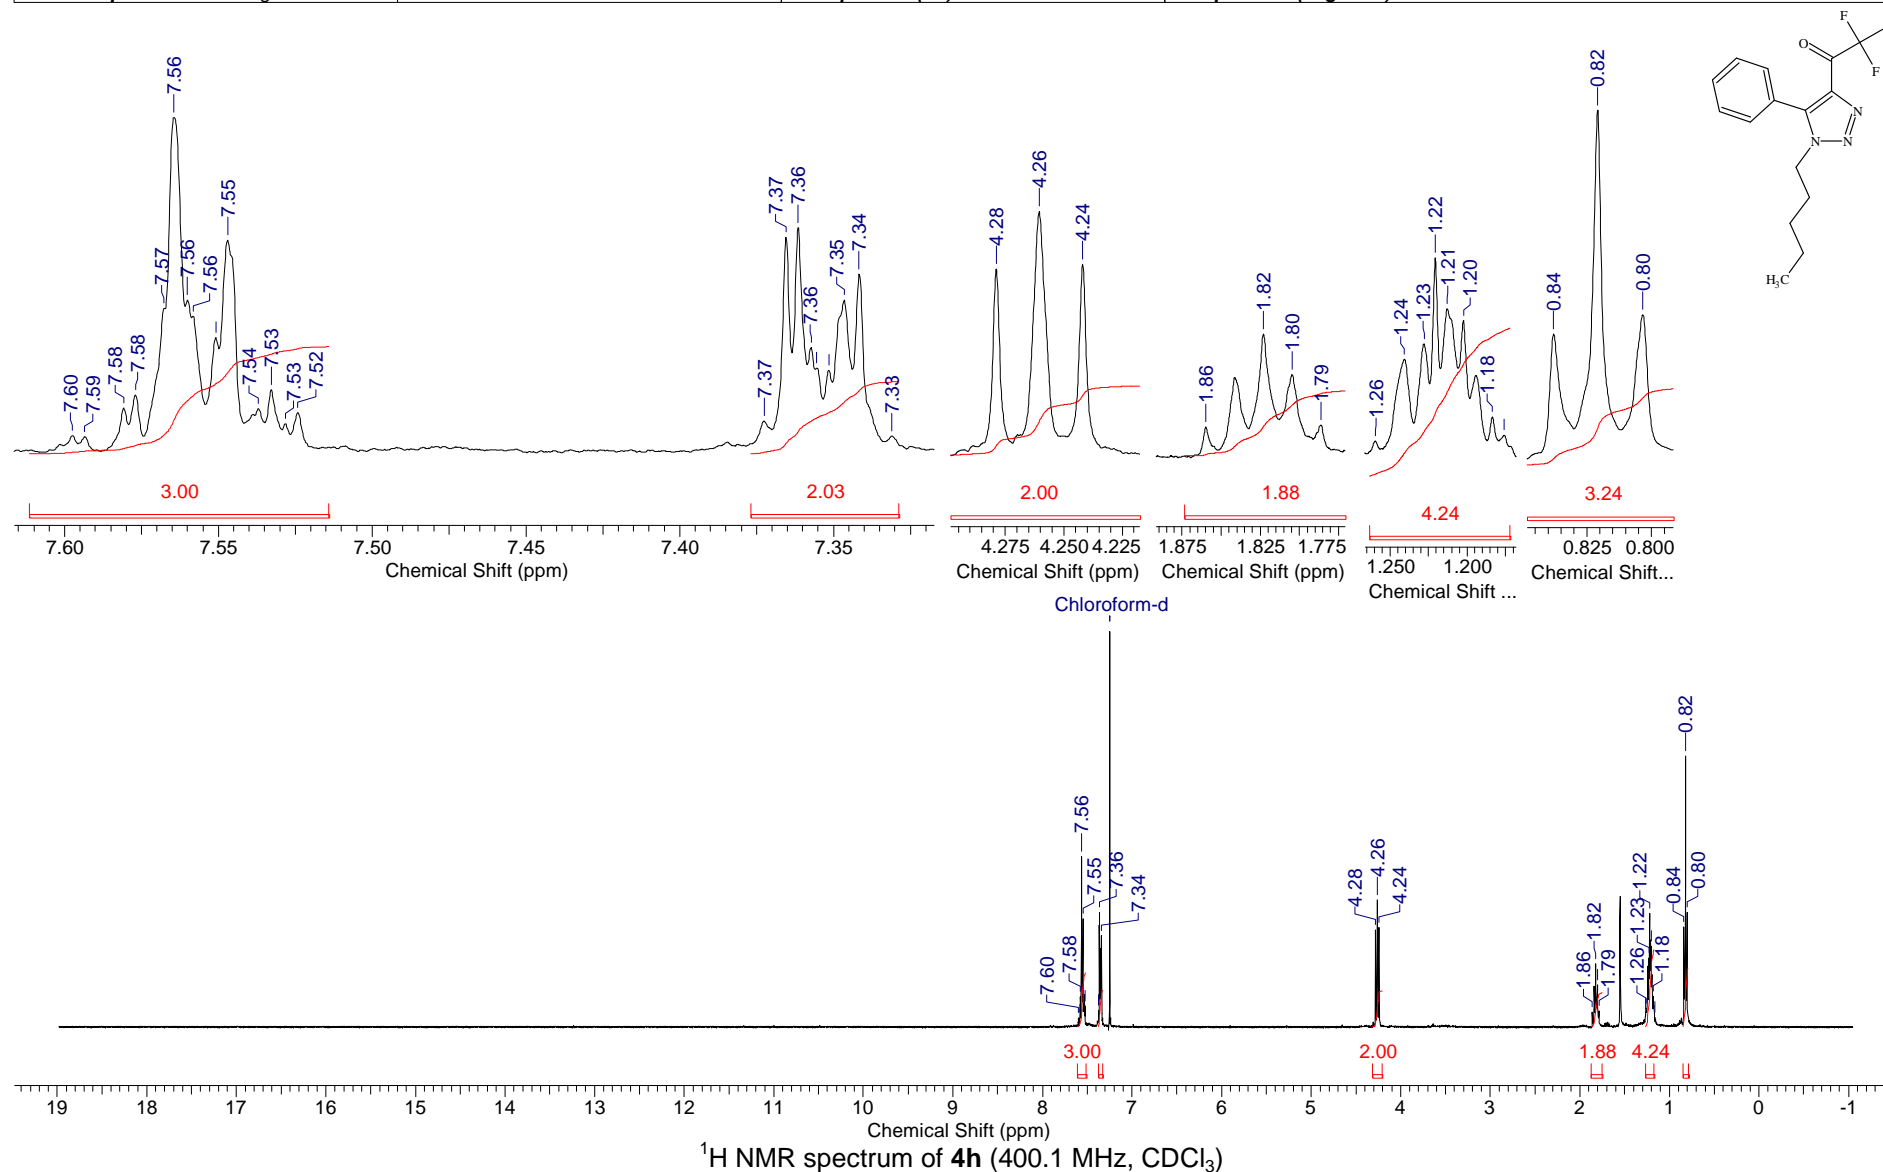

|                               |                                                       |                             |                      |                              |                      |
|-------------------------------|-------------------------------------------------------|-----------------------------|----------------------|------------------------------|----------------------|
| <b>Acquisition Time (sec)</b> | 1.7433                                                | <b>Comment</b>              | Imported from UXNMR. | <b>Date</b>                  | 05 Apr 2022 15:30:54 |
| <b>File Name</b>              | C:\DOCS\OUTPUT_301\2022\04.апрель\BM-2479-2.F_005001r | <b>Frequency (MHz)</b>      | 376.50               |                              |                      |
| <b>Nucleus</b>                | <sup>19</sup> F                                       | <b>Number of Transients</b> | 4                    | <b>Original Points Count</b> | 131072               |
| <b>Pulse Sequence</b>         | zgfgqn                                                | <b>Points Count</b>         | 262144               |                              |                      |
| <b>Temperature (degree C)</b> | 27.000                                                | <b>Solvent</b>              | CHLOROFORM-D         | <b>Sweep Width (Hz)</b>      | 75187.97             |

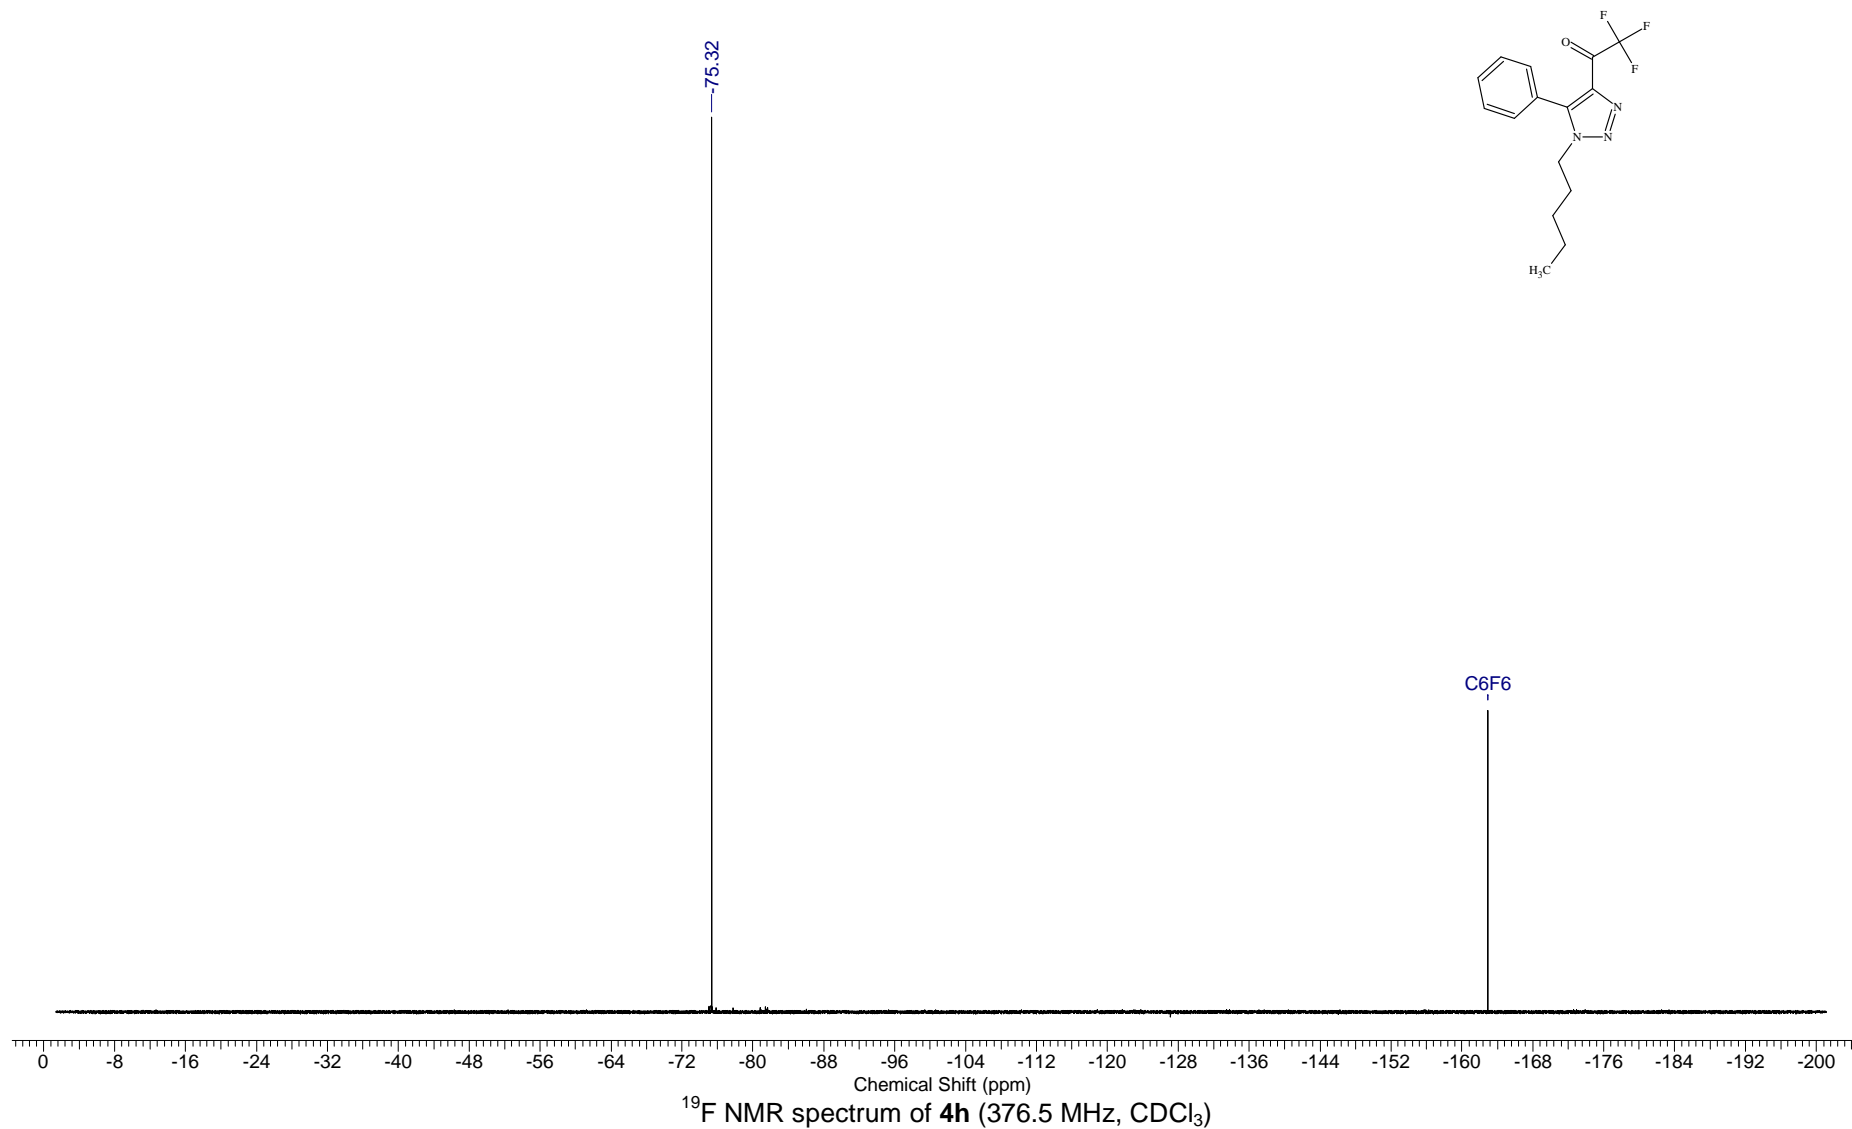

|                               |                                                       |                             |                      |                              |                      |
|-------------------------------|-------------------------------------------------------|-----------------------------|----------------------|------------------------------|----------------------|
| <b>Acquisition Time (sec)</b> | 0.6783                                                | <b>Comment</b>              | Imported from UXNMR. | <b>Date</b>                  | 12 Apr 2022 16:03:14 |
| <b>File Name</b>              | C:\DOCS\OUTPUT_301\2022\04.апрель\BM-2479-2.C_002001r | <b>Frequency (MHz)</b>      | 100.61               | <b>Points Count</b>          | 131072               |
| <b>Nucleus</b>                | <sup>13</sup> C                                       | <b>Number of Transients</b> | 307                  | <b>Original Points Count</b> | 16384                |
| <b>Pulse Sequence</b>         | zgpg30                                                | <b>Solvent</b>              | CHLOROFORM-D         | <b>Sweep Width (Hz)</b>      | 24154.59             |
| <b>Temperature (degree C)</b> | 27.000                                                |                             |                      |                              |                      |

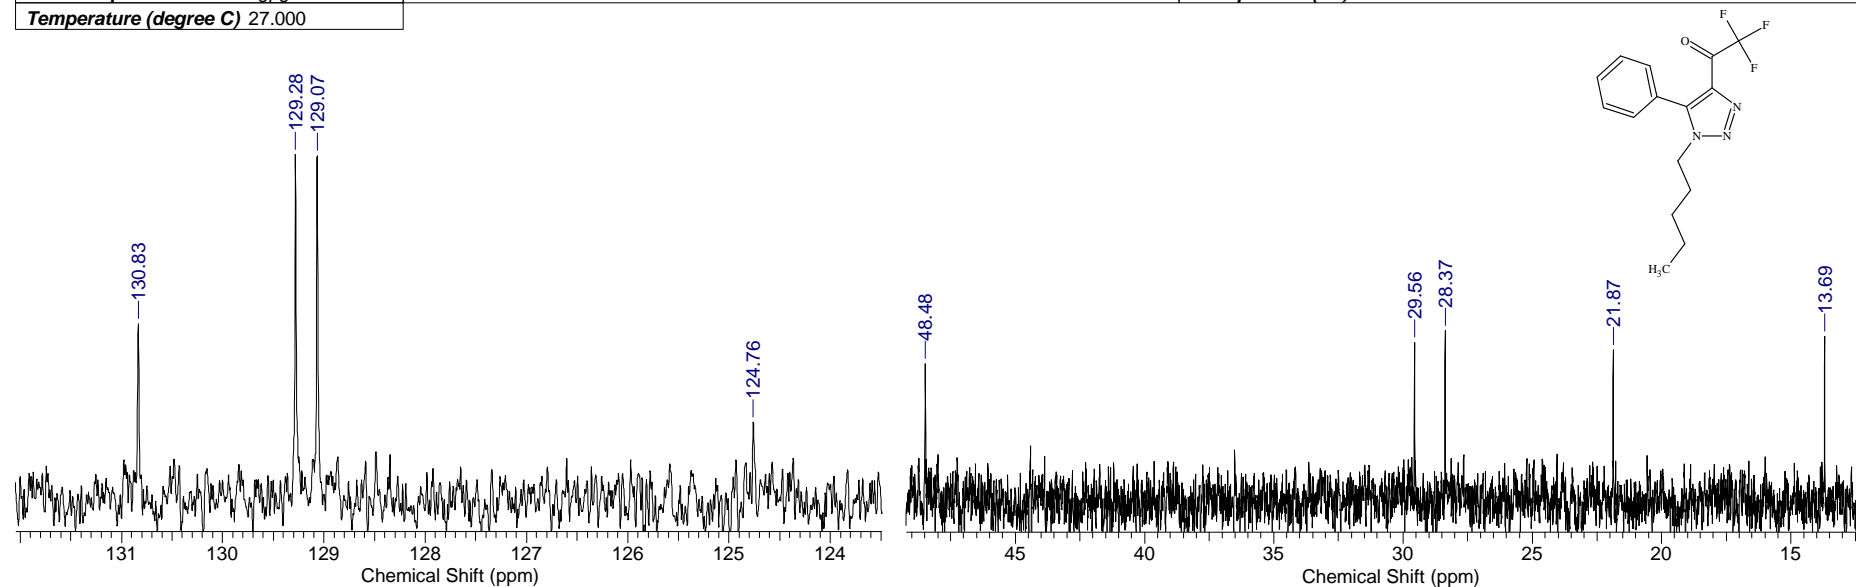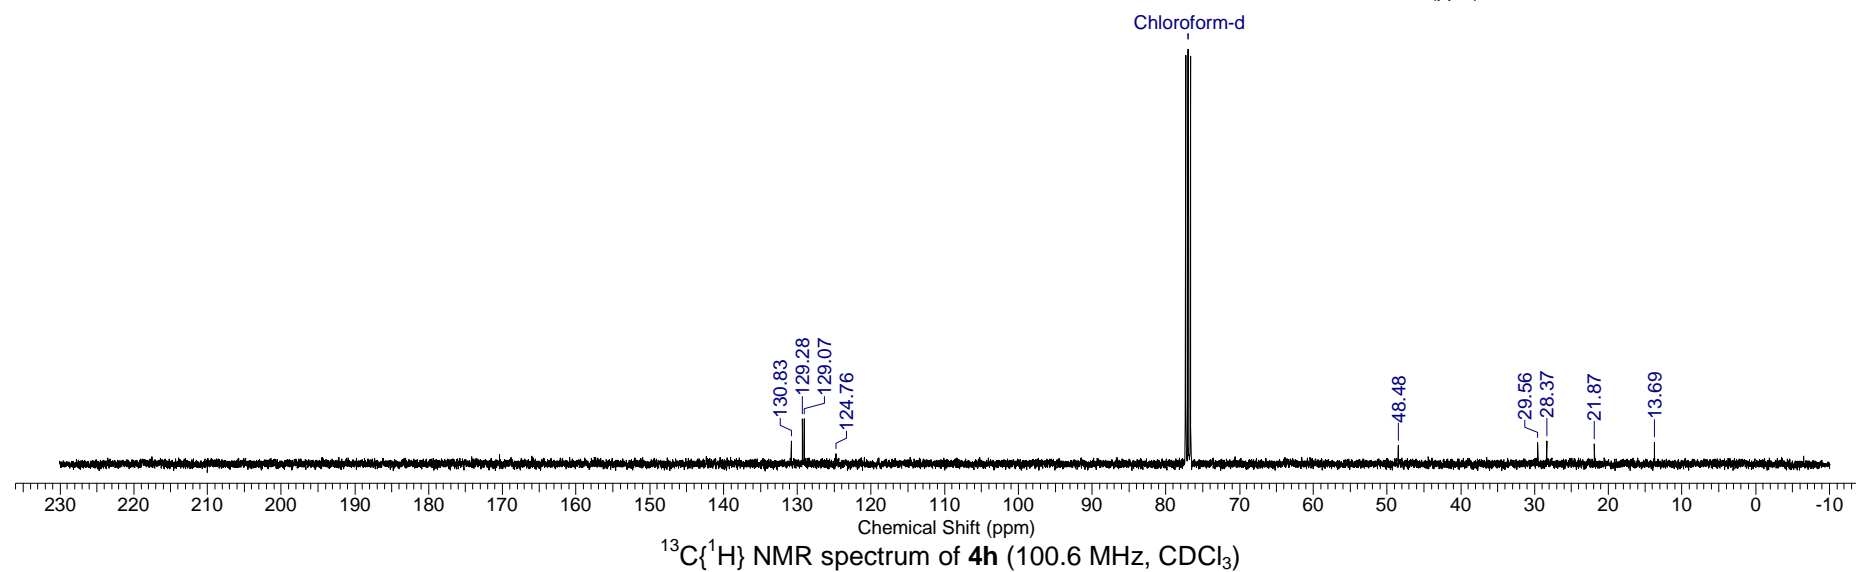

|                        |                                                    |                      |                      |                       |       |                  |                      |  |  |
|------------------------|----------------------------------------------------|----------------------|----------------------|-----------------------|-------|------------------|----------------------|--|--|
| Acquisition Time (sec) | 4.0894                                             | Comment              | Imported from UXMNR. |                       |       | Date             | 25 Mar 2022 15:48:10 |  |  |
| File Name              | C:\DOCS\OUTPUT_301\2022\03.map\BM-2464-2.H_001001r |                      |                      |                       |       | Frequency (MHz)  | 400.13               |  |  |
| Nucleus                | 1H                                                 | Number of Transients | 4                    | Original Points Count | 32768 | Points Count     | 131072               |  |  |
| Pulse Sequence         | zg30                                               | Solvent              | CHLOROFORM-D         |                       |       | Sweep Width (Hz) | 8012.82              |  |  |
| Temperature (degree C) | 27.000                                             |                      |                      |                       |       |                  |                      |  |  |

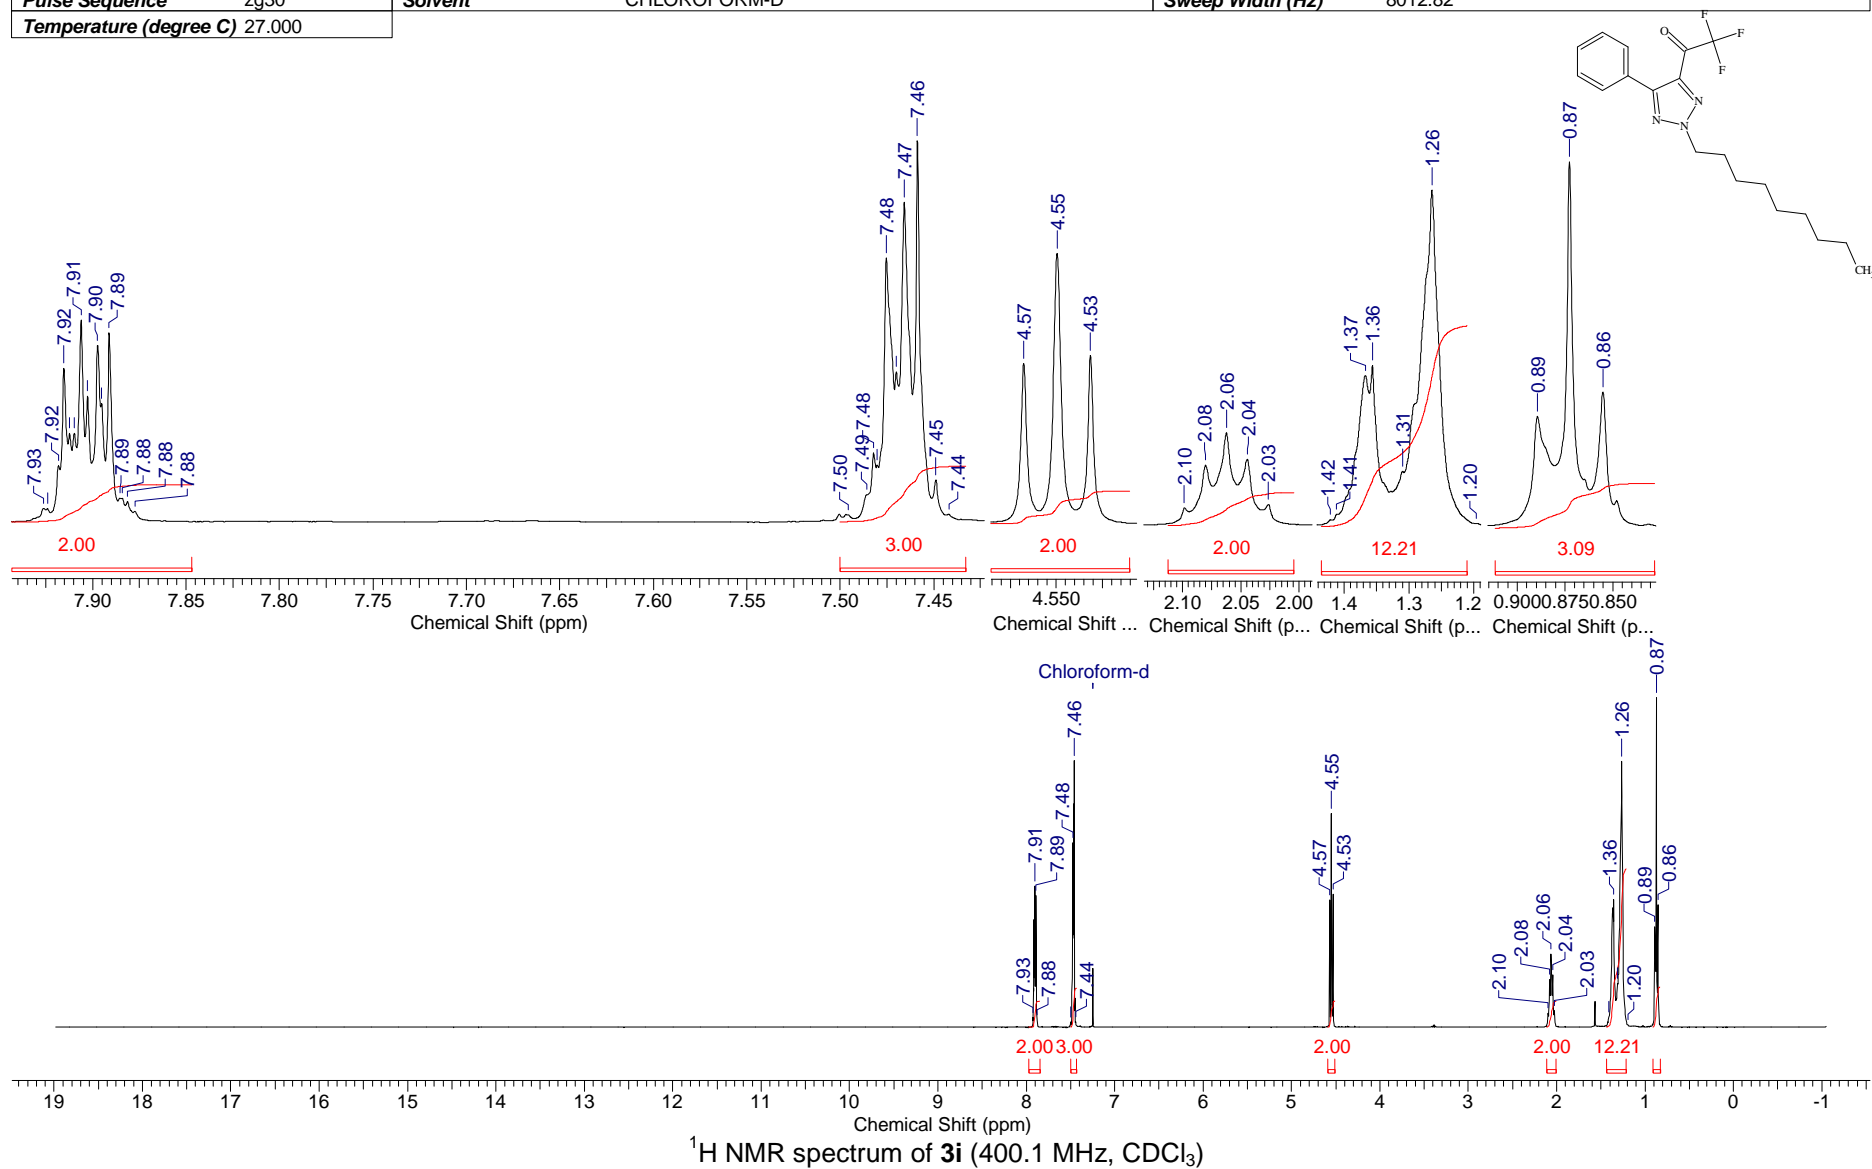



|                        |                                                     |                       |                      |                        |        |                      |       |
|------------------------|-----------------------------------------------------|-----------------------|----------------------|------------------------|--------|----------------------|-------|
| Acquisition Time (sec) | 1.7433                                              | Comment               | Imported from UXMNR. |                        | Date   | 25 Mar 2022 15:58:36 |       |
| File Name              | C:\DOCS\OUTPUT_301\2022\03.mapt\BM-2464-2.F_005001r | Frequency (MHz)       | 376.50               | Nucleus                | 19F    |                      |       |
| Number of Transients   | 4                                                   | Original Points Count | 131072               | Points Count           | 262144 | Pulse Sequence       | zgfgn |
| Solvent                | CHLOROFORM-D                                        | Sweep Width (Hz)      | 75187.97             | Temperature (degree C) | 27.000 |                      |       |

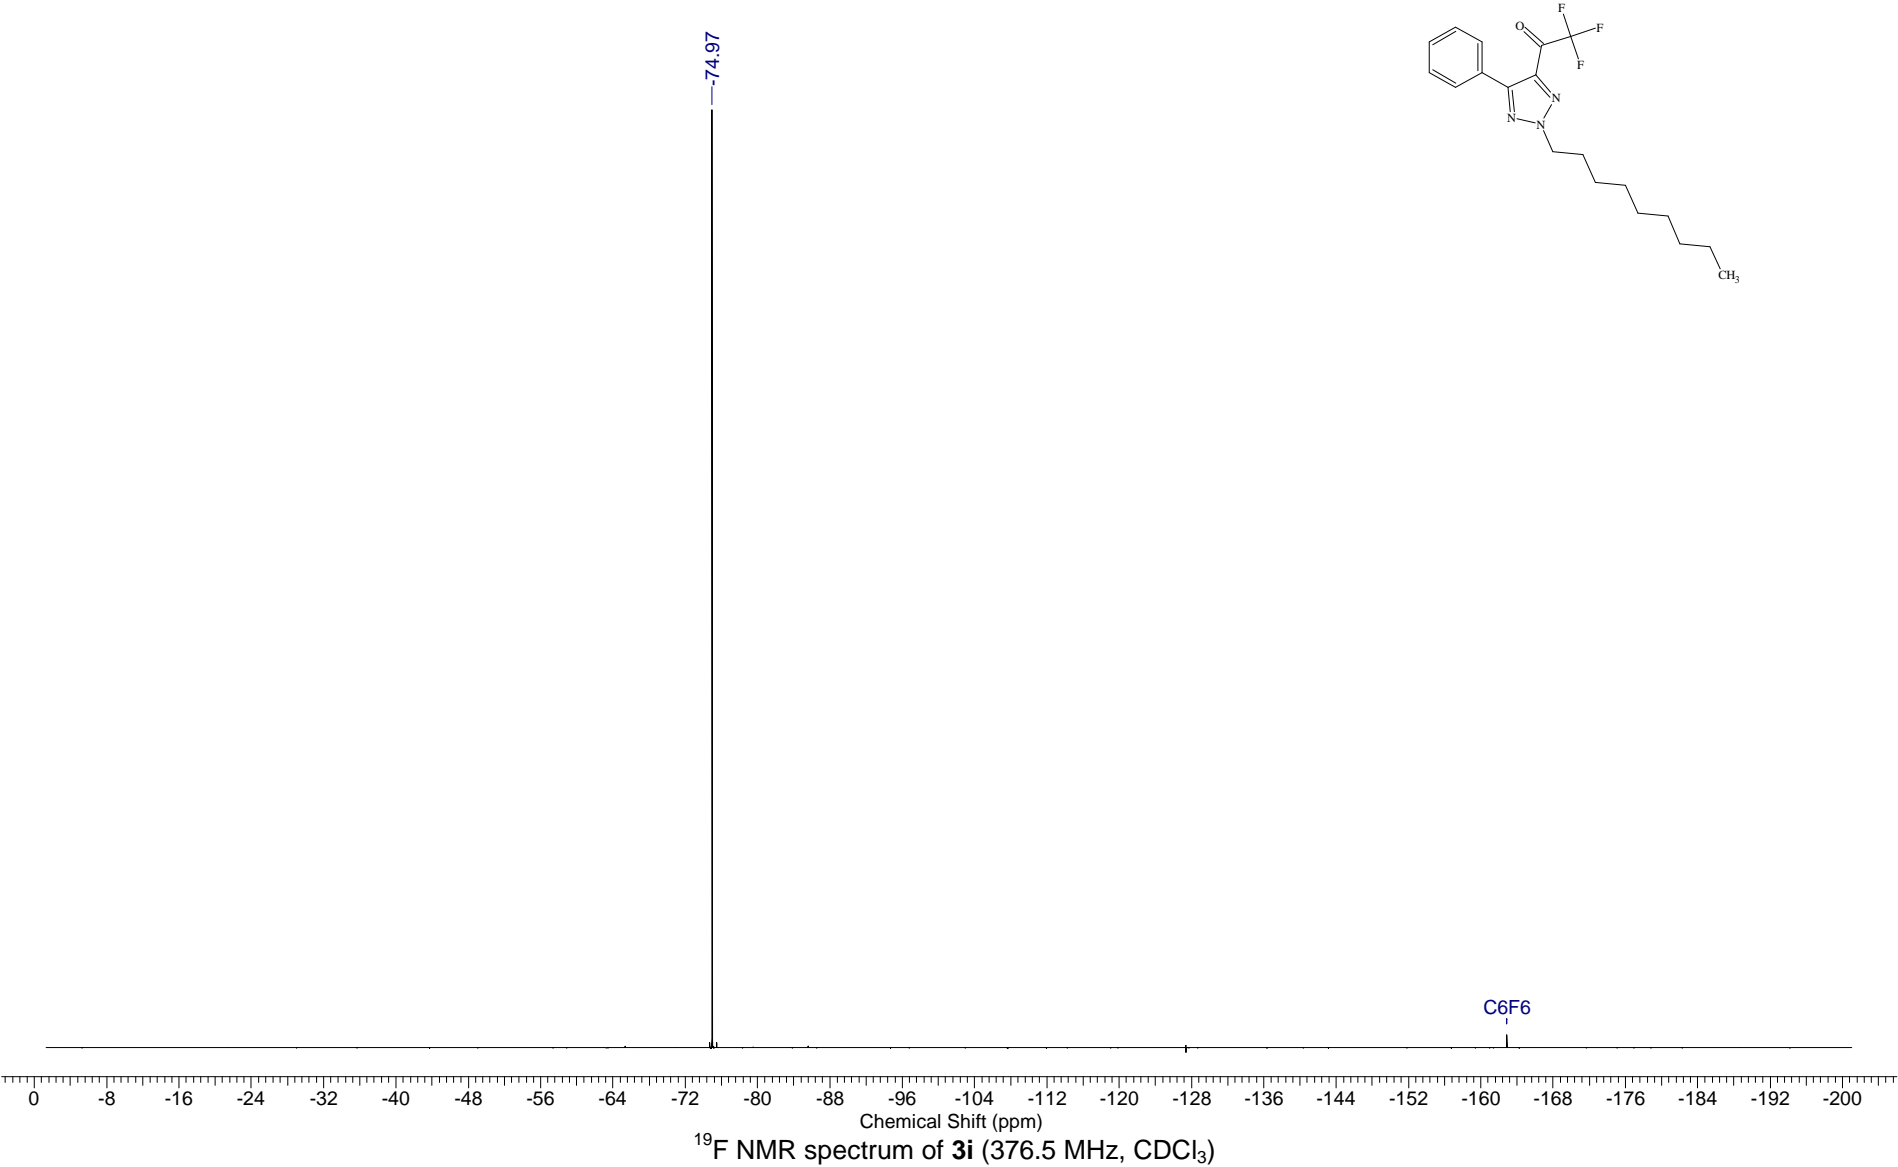

|                        |                                                       |                      |                      |                       |       |                  |                      |
|------------------------|-------------------------------------------------------|----------------------|----------------------|-----------------------|-------|------------------|----------------------|
| Acquisition Time (sec) | 0.6783                                                | Comment              | Imported from UXNMR. |                       |       | Date             | 26 Mar 2022 13:44:02 |
| File Name              | C:\DOCS\BM\MP_COCE\DI\2022\bm220326\BM-2464-2_002001r |                      |                      |                       |       | Frequency (MHz)  | 100.61               |
| Nucleus                | 13C                                                   | Number of Transients | 160                  | Original Points Count | 16384 | Points Count     | 131072               |
| Pulse Sequence         | zgpg30                                                | Solvent              | CHLOROFORM-D         |                       |       | Sweep Width (Hz) | 24154.59             |
| Temperature (degree C) | 27.000                                                |                      |                      |                       |       | F                |                      |

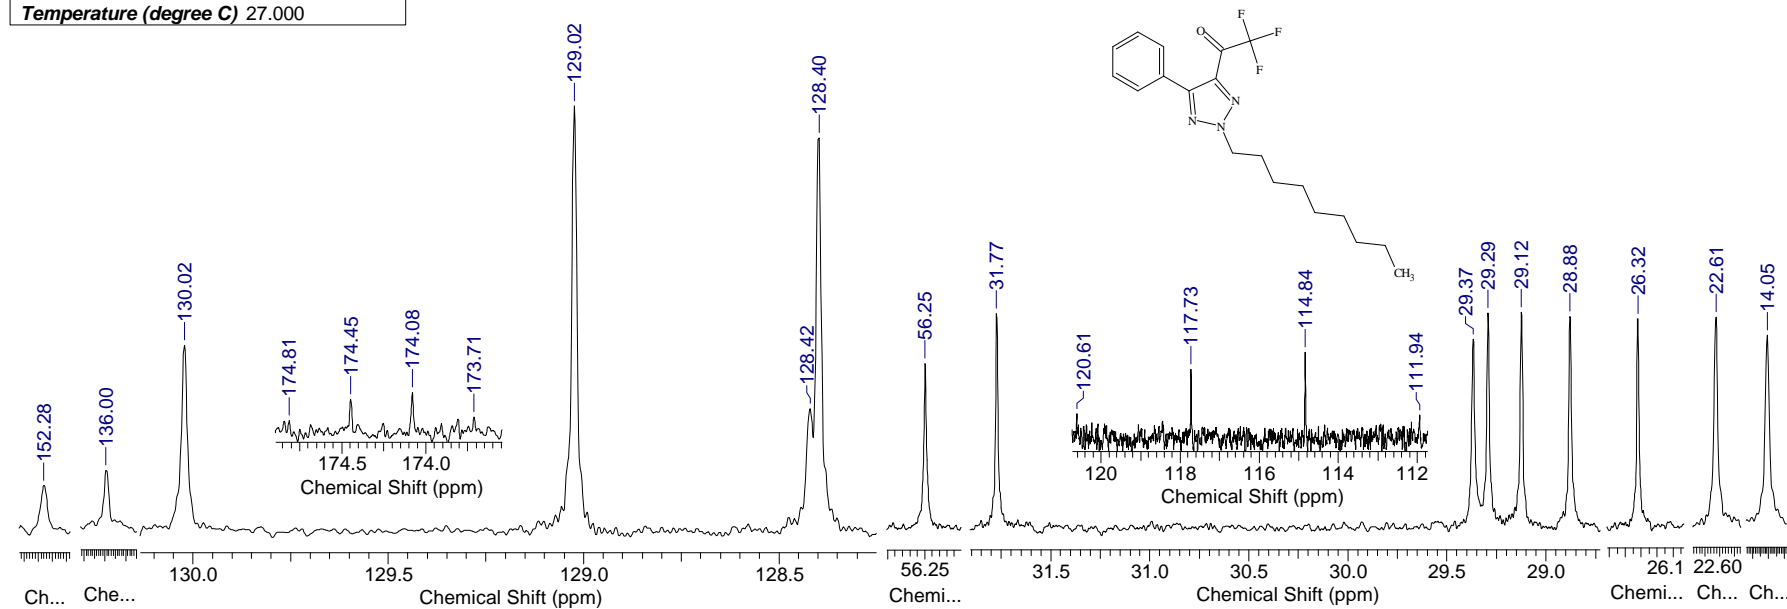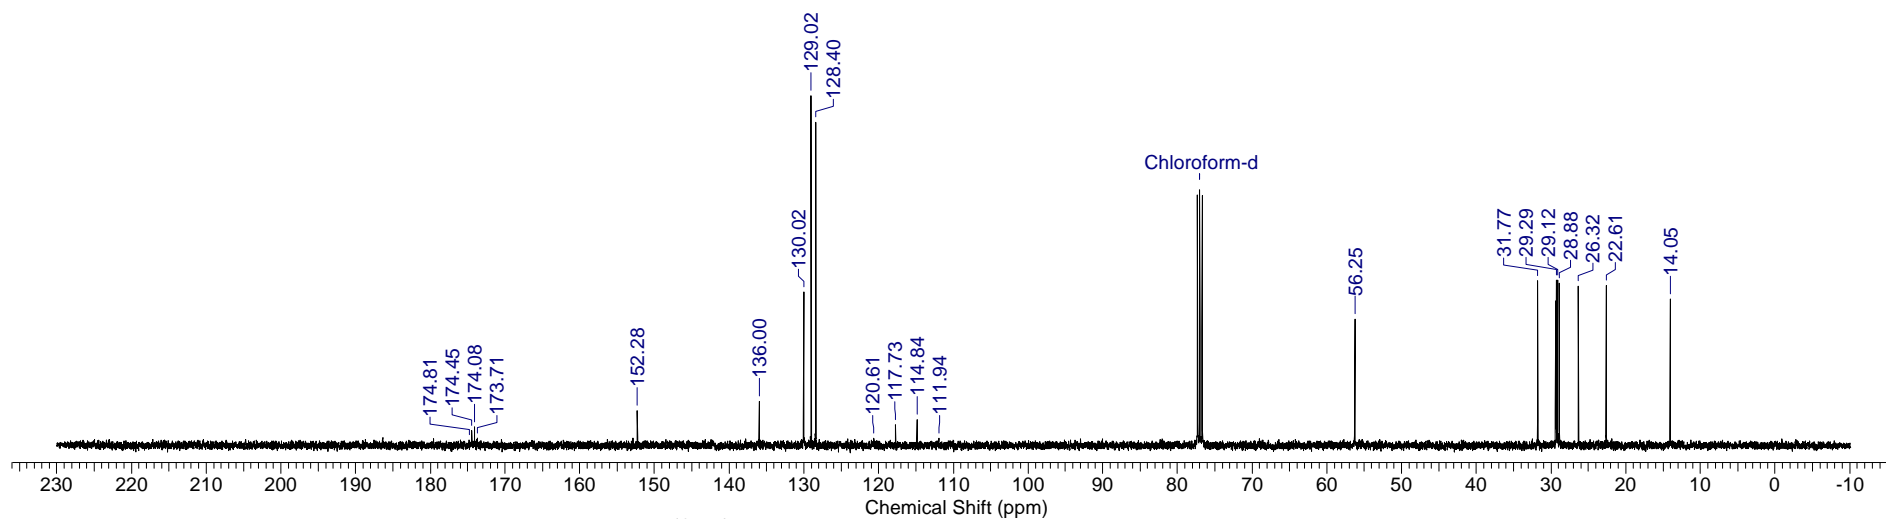<sup>13</sup>C{<sup>1</sup>H} NMR spectrum of **3i** (100.6 MHz, CDCl<sub>3</sub>)

|                               |                                                     |                             |                      |                              |                         |                      |        |
|-------------------------------|-----------------------------------------------------|-----------------------------|----------------------|------------------------------|-------------------------|----------------------|--------|
| <b>Acquisition Time (sec)</b> | 4.0894                                              | <b>Comment</b>              | Imported from UXNMR. |                              | <b>Date</b>             | 25 Mar 2022 15:50:02 |        |
| <b>File Name</b>              | C:\DOCS\OUTPUT_301\2022\03.mapr\BM-2464-3.H_001001r |                             |                      |                              | <b>Frequency (MHz)</b>  | 400.13               |        |
| <b>Nucleus</b>                | 1H                                                  | <b>Number of Transients</b> | 4                    | <b>Original Points Count</b> | 32768                   | <b>Points Count</b>  | 131072 |
| <b>Pulse Sequence</b>         | zg30                                                | <b>Solvent</b>              | CHLOROFORM-D         |                              | <b>Sweep Width (Hz)</b> | 8012.82              |        |
| <b>Temperature (degree C)</b> | 27.000                                              |                             |                      |                              |                         |                      |        |

F

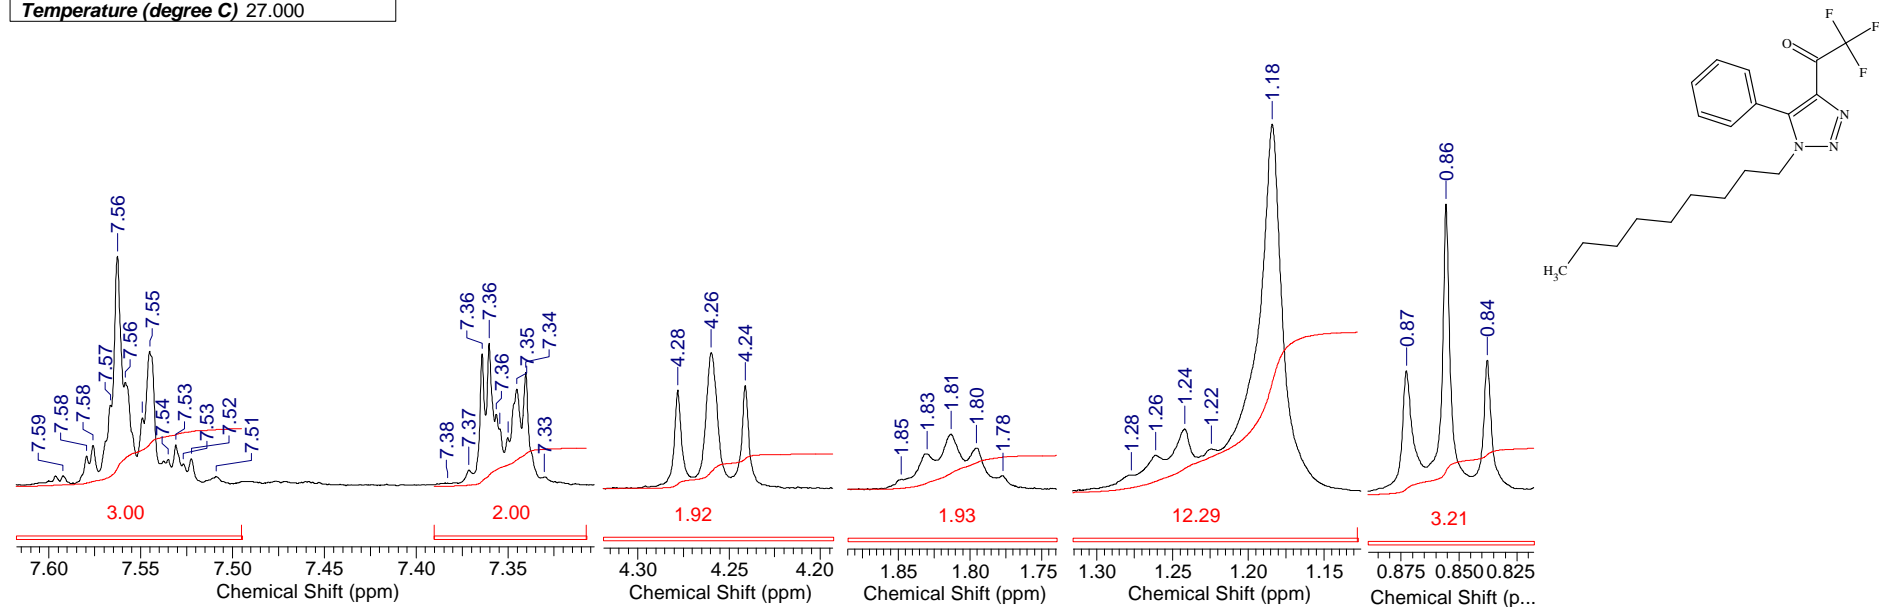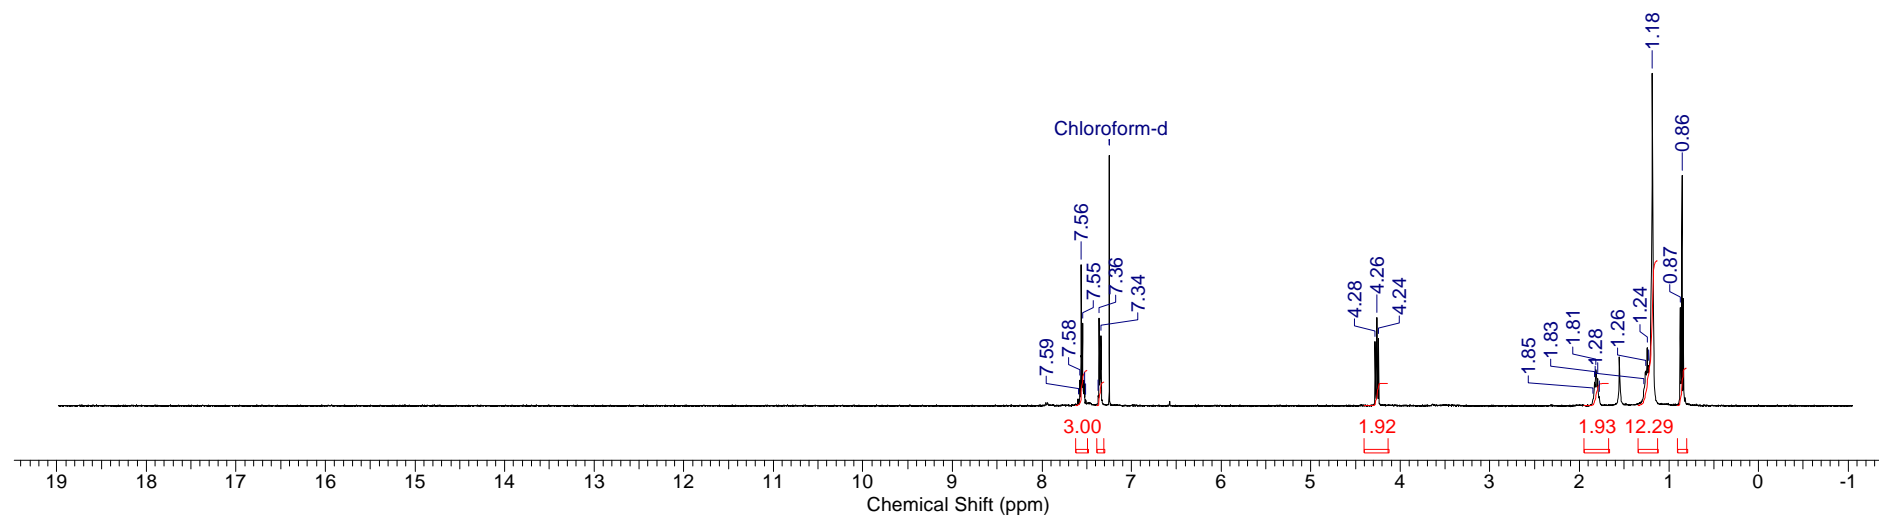<sup>1</sup>H NMR spectrum of **4i** (400.1 MHz, CDCl<sub>3</sub>)

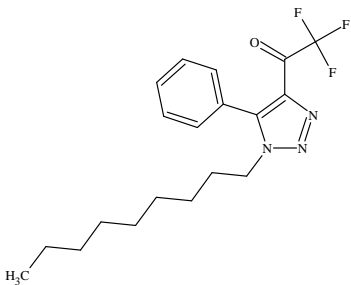

|                               |                                                     |                              |                      |                               |                      |
|-------------------------------|-----------------------------------------------------|------------------------------|----------------------|-------------------------------|----------------------|
| <b>Acquisition Time (sec)</b> | 0.6783                                              | <b>Comment</b>               | Imported from UXNMR. | <b>Date</b>                   | 29 Mar 2022 16:07:40 |
| <b>File Name</b>              | C:\DOCS\OUTPUT_301\2022\03.mapr\BM-2464-3.C_002001r | <b>Frequency (MHz)</b>       | 100.61               | <b>Nucleus</b>                | <sup>13</sup> C      |
| <b>Number of Transients</b>   | 175                                                 | <b>Original Points Count</b> | 16384                | <b>Points Count</b>           | 131072               |
| <b>Solvent</b>                | CHLOROFORM-D                                        | <b>Sweep Width (Hz)</b>      | 24154.59             | <b>Pulse Sequence</b>         | zgpg30               |
|                               |                                                     |                              |                      | <b>Temperature (degree C)</b> | 27.000               |

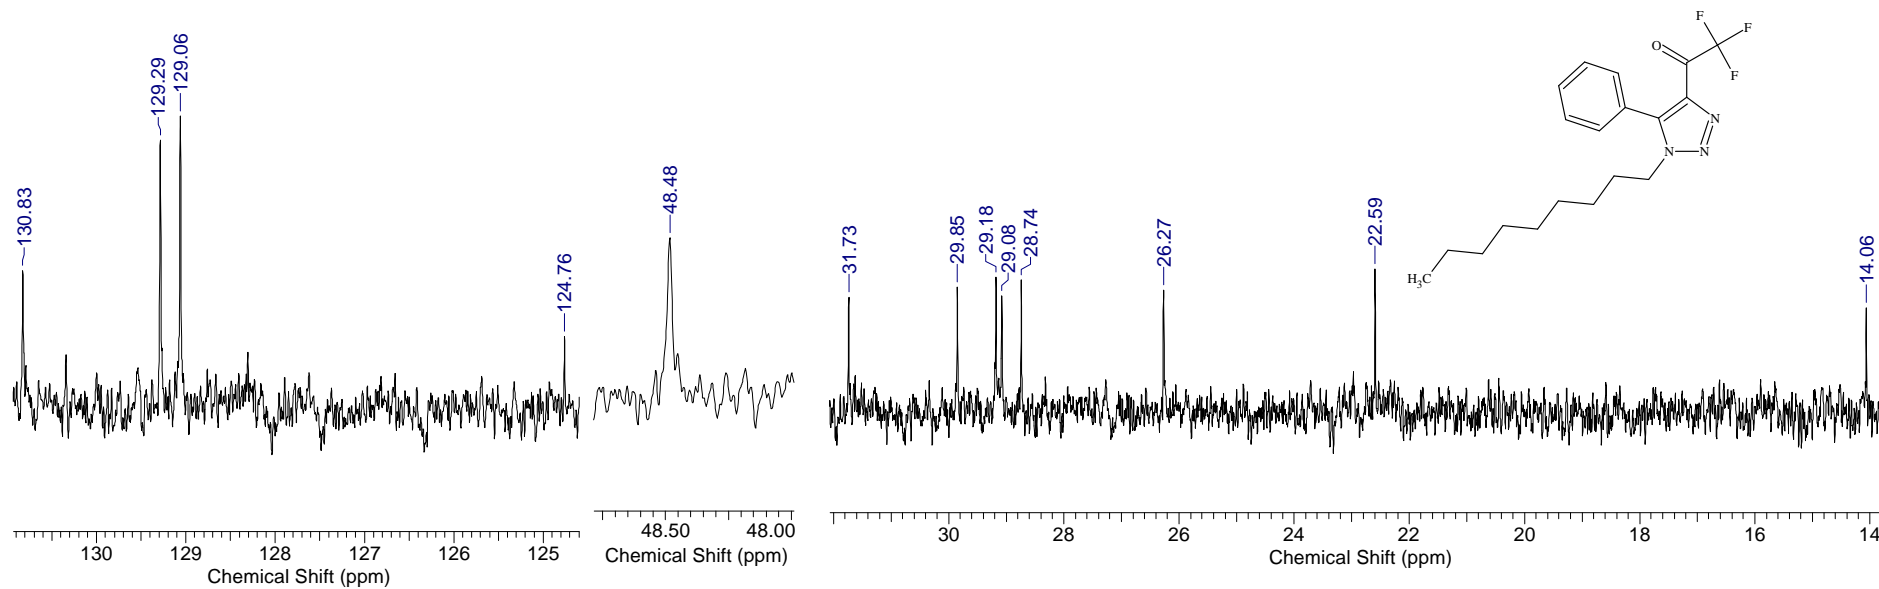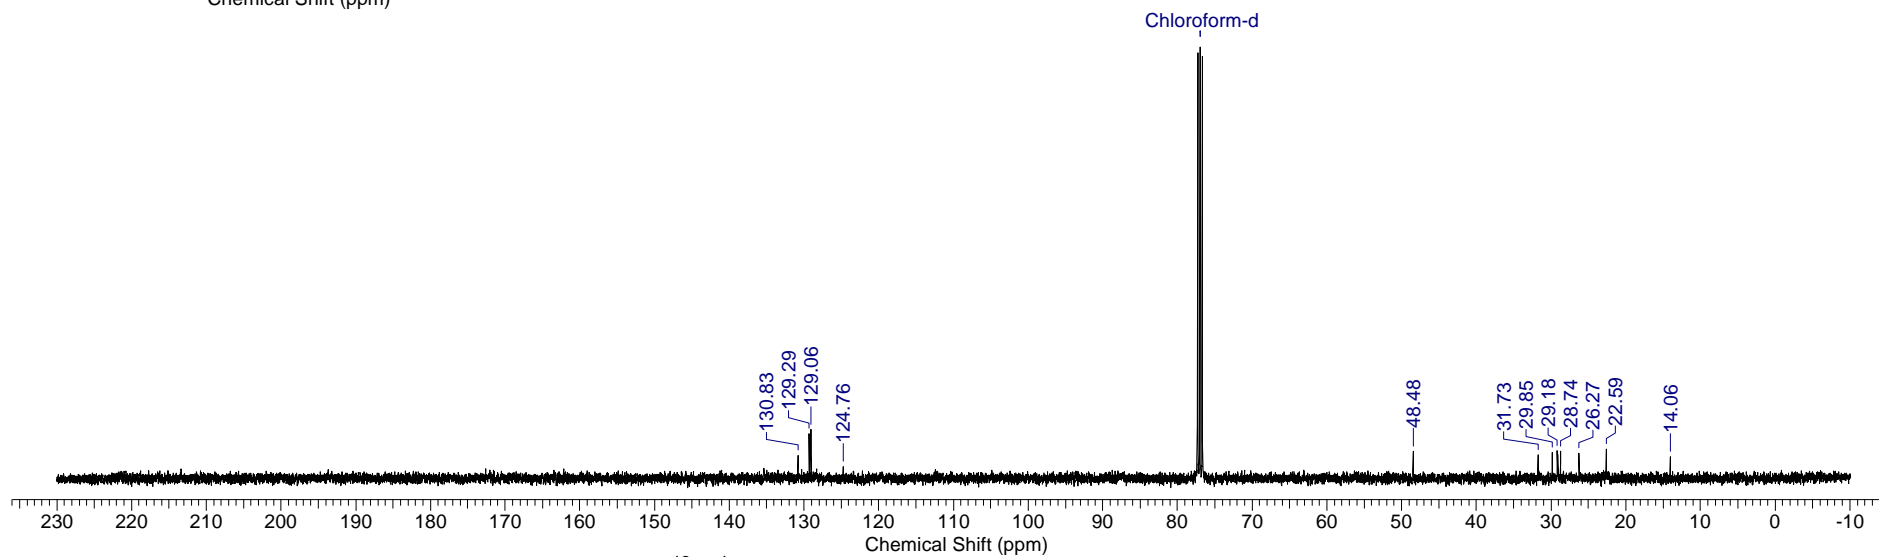<sup>13</sup>C{<sup>1</sup>H} NMR spectrum of **4i** (100.6 MHz, CDCl<sub>3</sub>)

|                        |                                                          |                      |                      |                       |         |                        |                      |
|------------------------|----------------------------------------------------------|----------------------|----------------------|-----------------------|---------|------------------------|----------------------|
| Acquisition Time (sec) | 4.0894                                                   | Comment              | Imported from UXNMR. |                       |         | Date                   | 06 Apr 2022 17:11:40 |
| File Name              | C:\DOCS\OUTPUT_301\2022\04.апрель\SZA-BM-2481R.H_001001r |                      |                      |                       |         | Frequency (MHz)        | 400.13               |
| Nucleus                | 1H                                                       | Number of Transients | 4                    | Original Points Count | 32768   | Points Count           | 131072               |
| Pulse Sequence         | zg30                                                     | Solvent              | BENZENE-D6           | Sweep Width (Hz)      | 8012.82 | Temperature (degree C) | 27.000               |

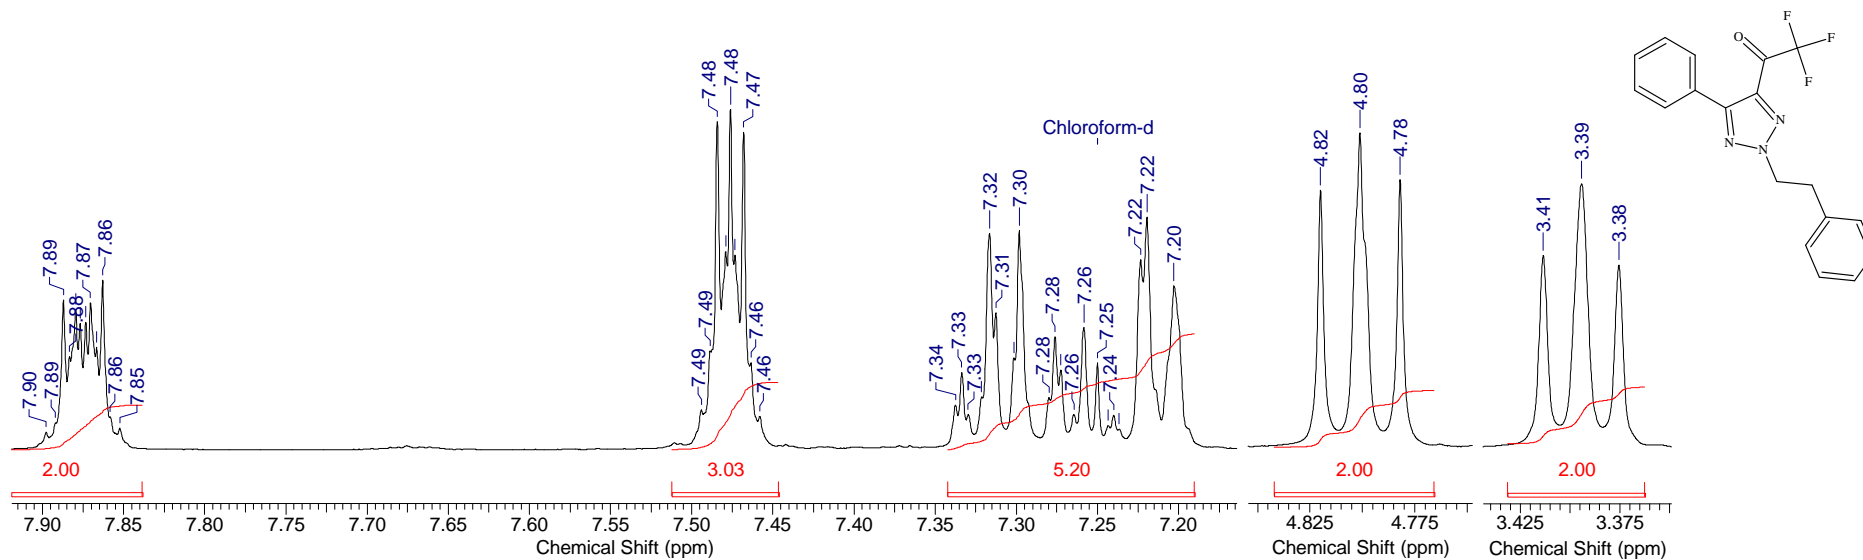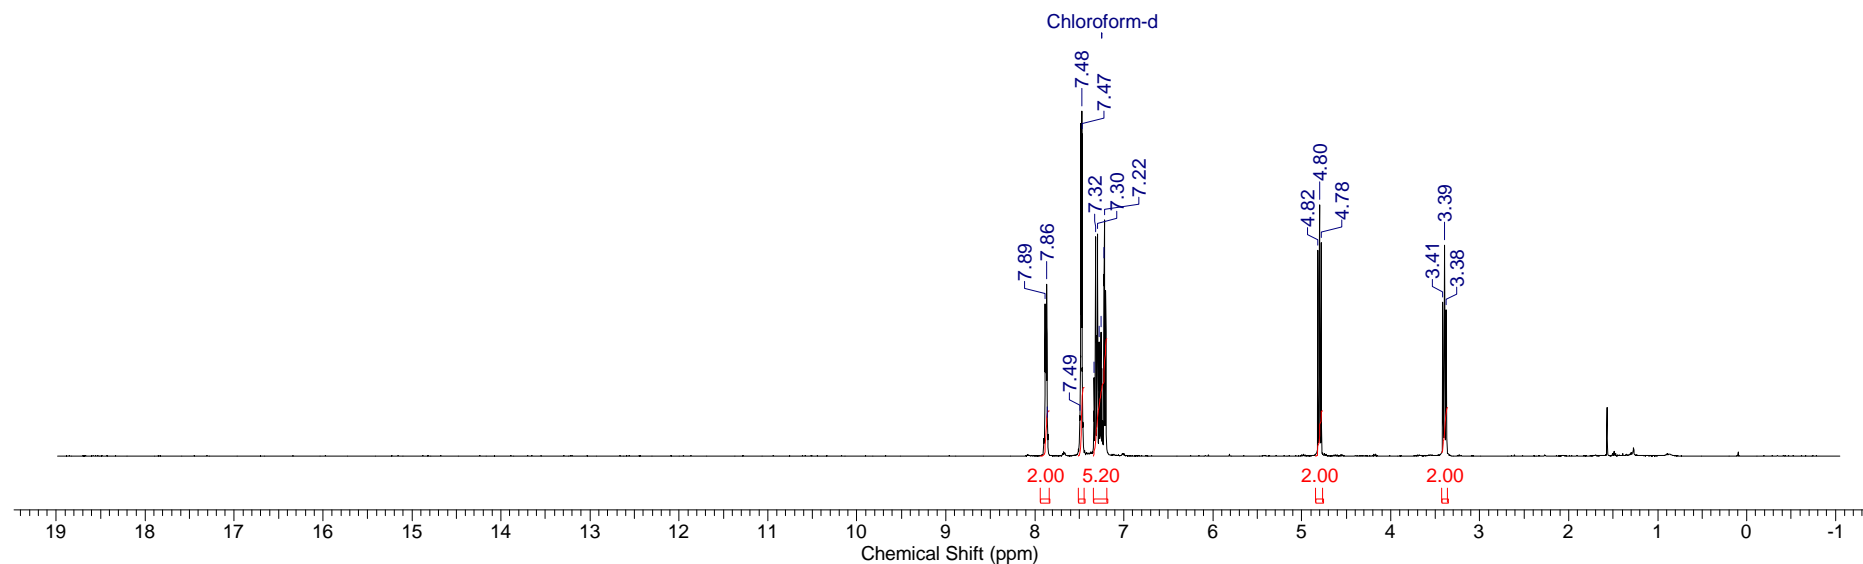<sup>1</sup>H NMR spectrum of **3j** (400.1 MHz, CDCl<sub>3</sub>)

|                        |                                                          |                      |                      |                       |                  |                      |        |
|------------------------|----------------------------------------------------------|----------------------|----------------------|-----------------------|------------------|----------------------|--------|
| Acquisition Time (sec) | 1.7433                                                   | Comment              | Imported from UXNMR. |                       | Date             | 06 Apr 2022 17:37:22 |        |
| File Name              | C:\DOCS\OUTPUT_301\2022\04.апрель\SZA-BM-2481R.F_005001r |                      |                      |                       | Frequency (MHz)  | 376.50               |        |
| Nucleus                | 19F                                                      | Number of Transients | 16                   | Original Points Count | 131072           | Points Count         | 262144 |
| Pulse Sequence         | zgfgqn                                                   | Solvent              | CHLOROFORM-D         |                       | Sweep Width (Hz) | 75187.97             |        |
| Temperature (degree C) | 27.000                                                   |                      |                      |                       |                  |                      |        |

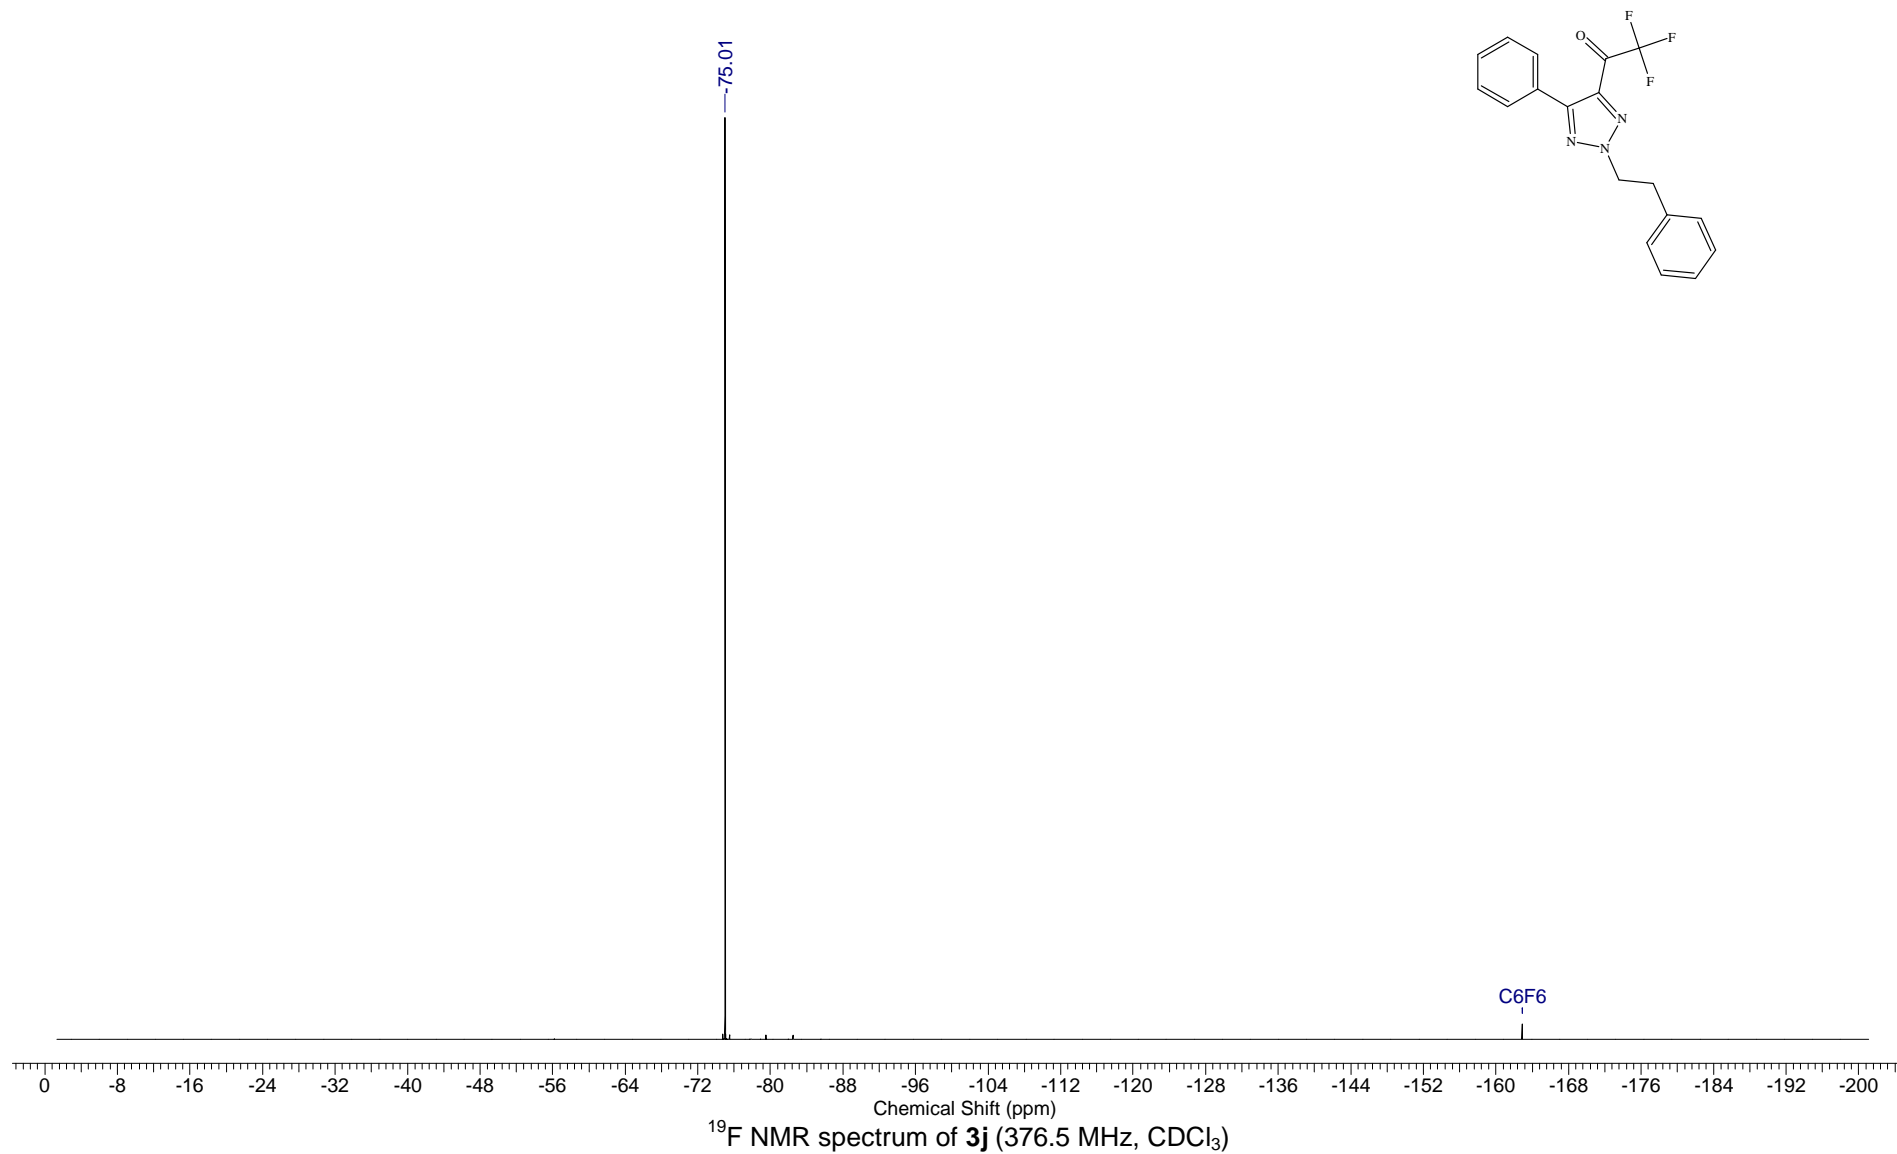

|                               |                                                         |                             |                      |                              |                         |                      |        |
|-------------------------------|---------------------------------------------------------|-----------------------------|----------------------|------------------------------|-------------------------|----------------------|--------|
| <b>Acquisition Time (sec)</b> | 0.6783                                                  | <b>Comment</b>              | Imported from UXNMR. |                              | <b>Date</b>             | 06 Apr 2022 17:33:28 |        |
| <b>File Name</b>              | C:\DOCS\OUTPUT_301\2022\04.апрель\SA-BM-2481R.C_002001r |                             |                      |                              | <b>Frequency (MHz)</b>  | 100.61               |        |
| <b>Nucleus</b>                | 13C                                                     | <b>Number of Transients</b> | 521                  | <b>Original Points Count</b> | 16384                   | <b>Points Count</b>  | 131072 |
| <b>Pulse Sequence</b>         | zgpg30                                                  | <b>Solvent</b>              | CHLOROFORM-D         |                              | <b>Sweep Width (Hz)</b> | 24154.59             |        |
| <b>Temperature (degree C)</b> | 27.000                                                  |                             |                      |                              |                         |                      |        |

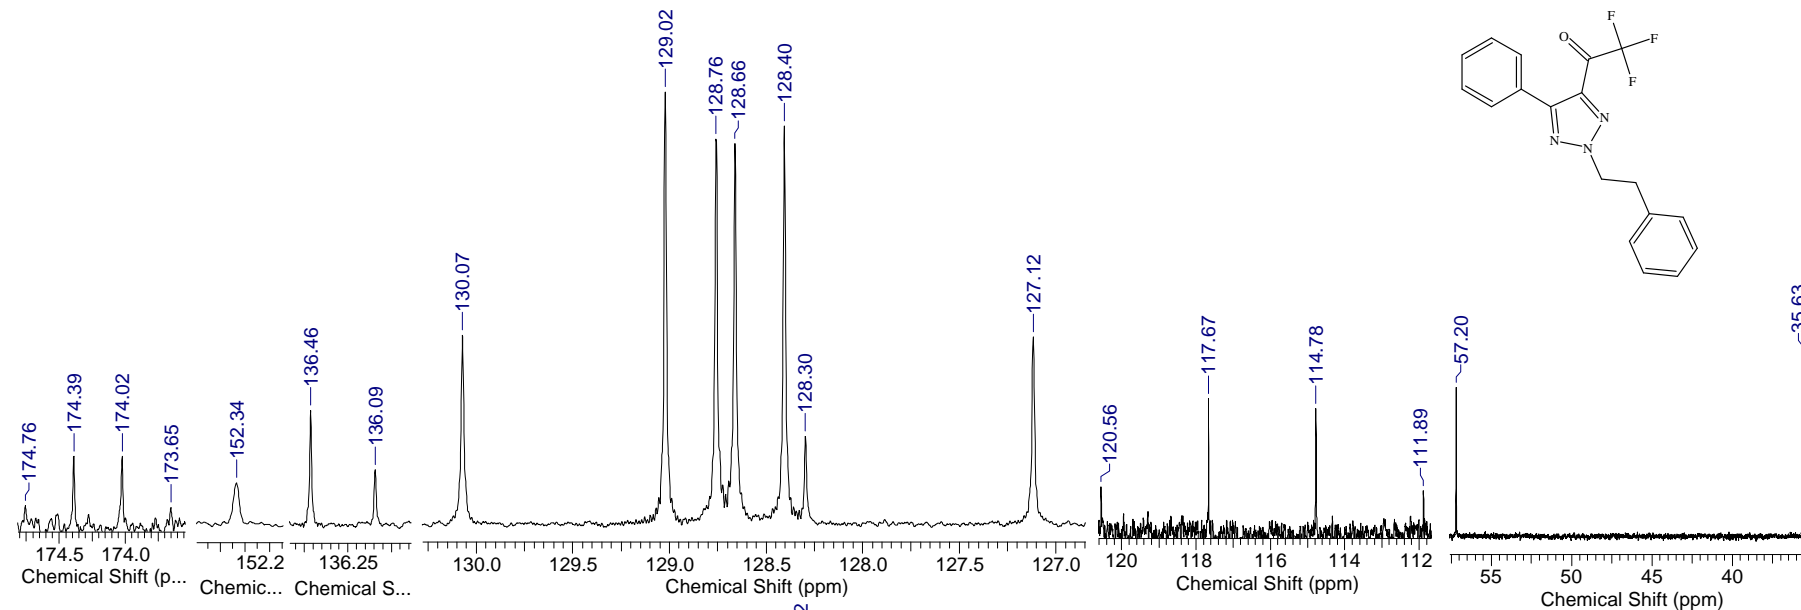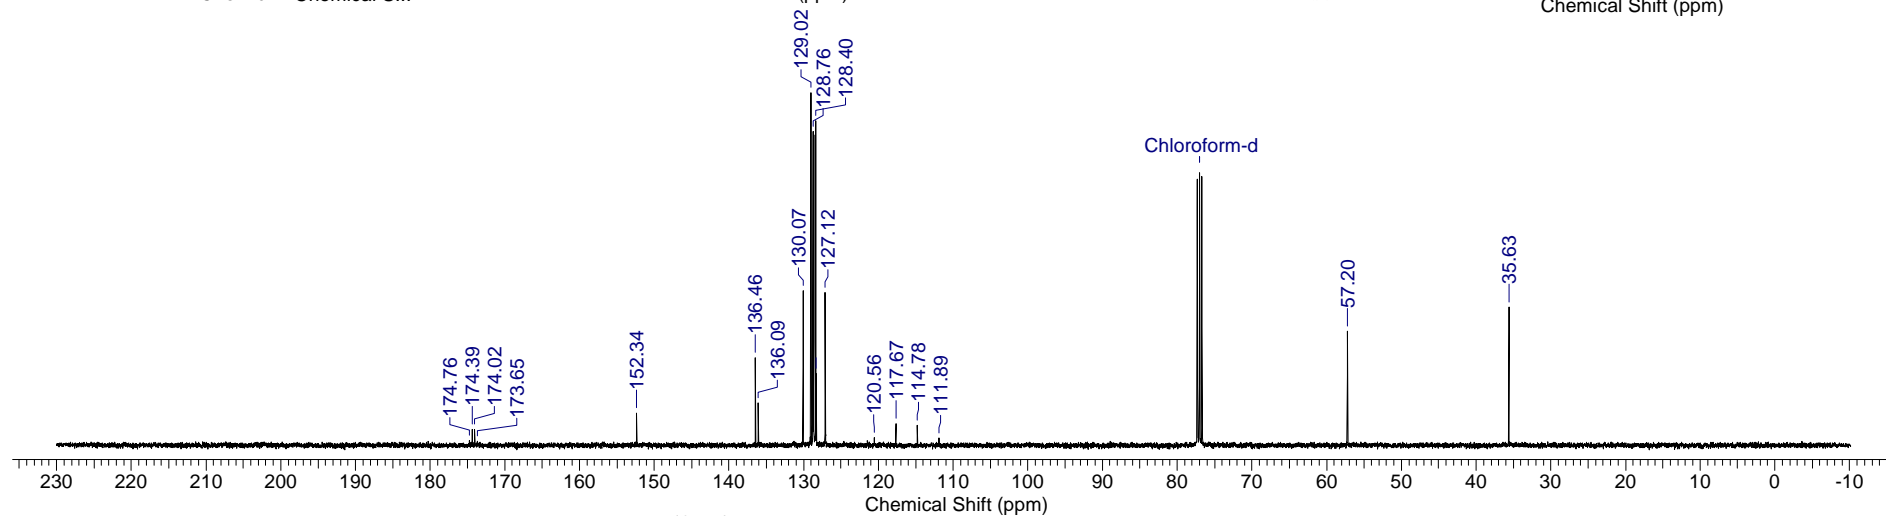<sup>13</sup>C{<sup>1</sup>H} NMR spectrum of **3j** (100.6 MHz, CDCl<sub>3</sub>)



|                               |                                                             |                             |                      |                              |                      |
|-------------------------------|-------------------------------------------------------------|-----------------------------|----------------------|------------------------------|----------------------|
| <b>Acquisition Time (sec)</b> | 4.0894                                                      | <b>Comment</b>              | Imported from UXNMR. | <b>Date</b>                  | 07 Apr 2022 11:31:38 |
| <b>File Name</b>              | C:\DOCS\OUTPUT_301\2022\04.апрель\SA-BM-2481-11.H.H_001001r | <b>Frequency (MHz)</b>      | 400.13               | <b>Points Count</b>          | 131072               |
| <b>Nucleus</b>                | <sup>1</sup> H                                              | <b>Number of Transients</b> | 8                    | <b>Original Points Count</b> | 32768                |
| <b>Pulse Sequence</b>         | zg30                                                        | <b>Solvent</b>              | CHLOROFORM-D         | <b>Sweep Width (Hz)</b>      | 8012.82              |
| <b>Temperature (degree C)</b> | 27.000                                                      |                             |                      |                              |                      |

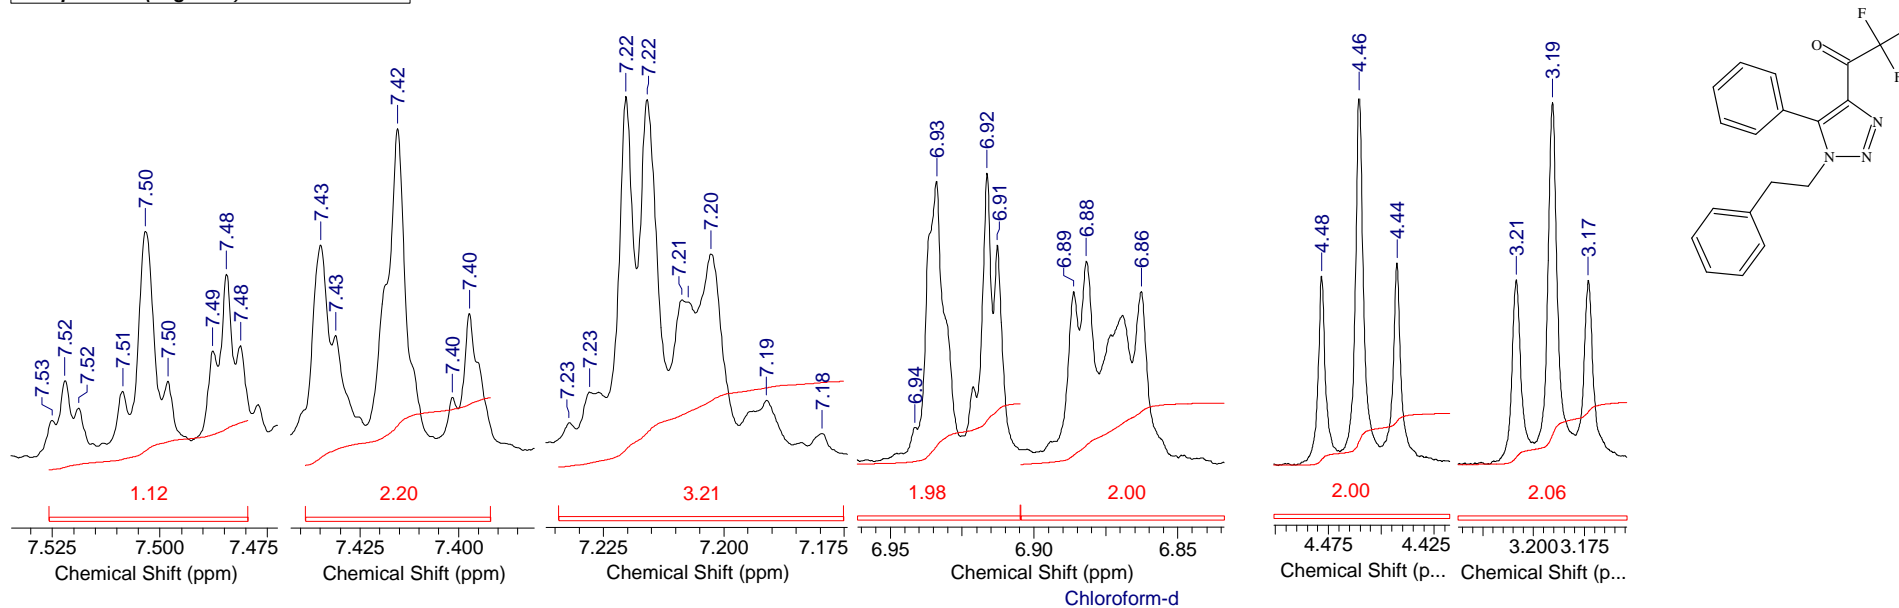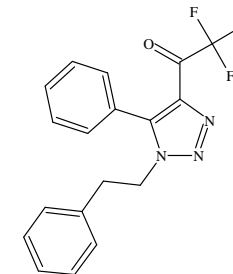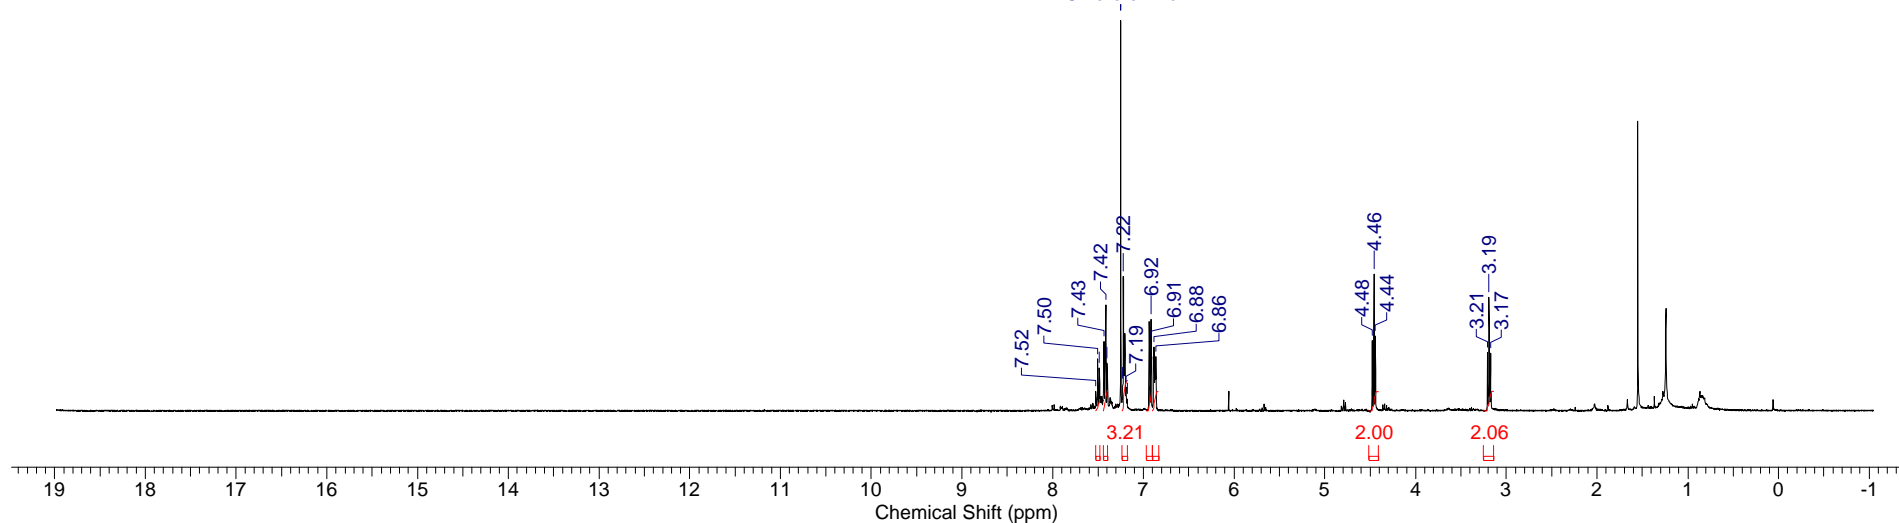<sup>1</sup>H NMR spectrum of **4j** (400.1 MHz, CDCl<sub>3</sub>)

|                        |                                                            |                      |                      |                       |                  |                      |        |
|------------------------|------------------------------------------------------------|----------------------|----------------------|-----------------------|------------------|----------------------|--------|
| Acquisition Time (sec) | 1.7433                                                     | Comment              | Imported from UXNMR. |                       | Date             | 07 Apr 2022 12:32:14 |        |
| File Name              | C:\DOCS\OUTPUT_301\2022\04.апрель\SZA-BM-2481-11.F_005001r |                      |                      |                       | Frequency (MHz)  | 376.50               |        |
| Nucleus                | 19F                                                        | Number of Transients | 16                   | Original Points Count | 131072           | Points Count         | 262144 |
| Pulse Sequence         | zgfgn                                                      | Solvent              | CHLOROFORM-D         |                       | Sweep Width (Hz) | 75187.97             |        |
| Temperature (degree C) | 27.000                                                     |                      |                      |                       |                  |                      |        |

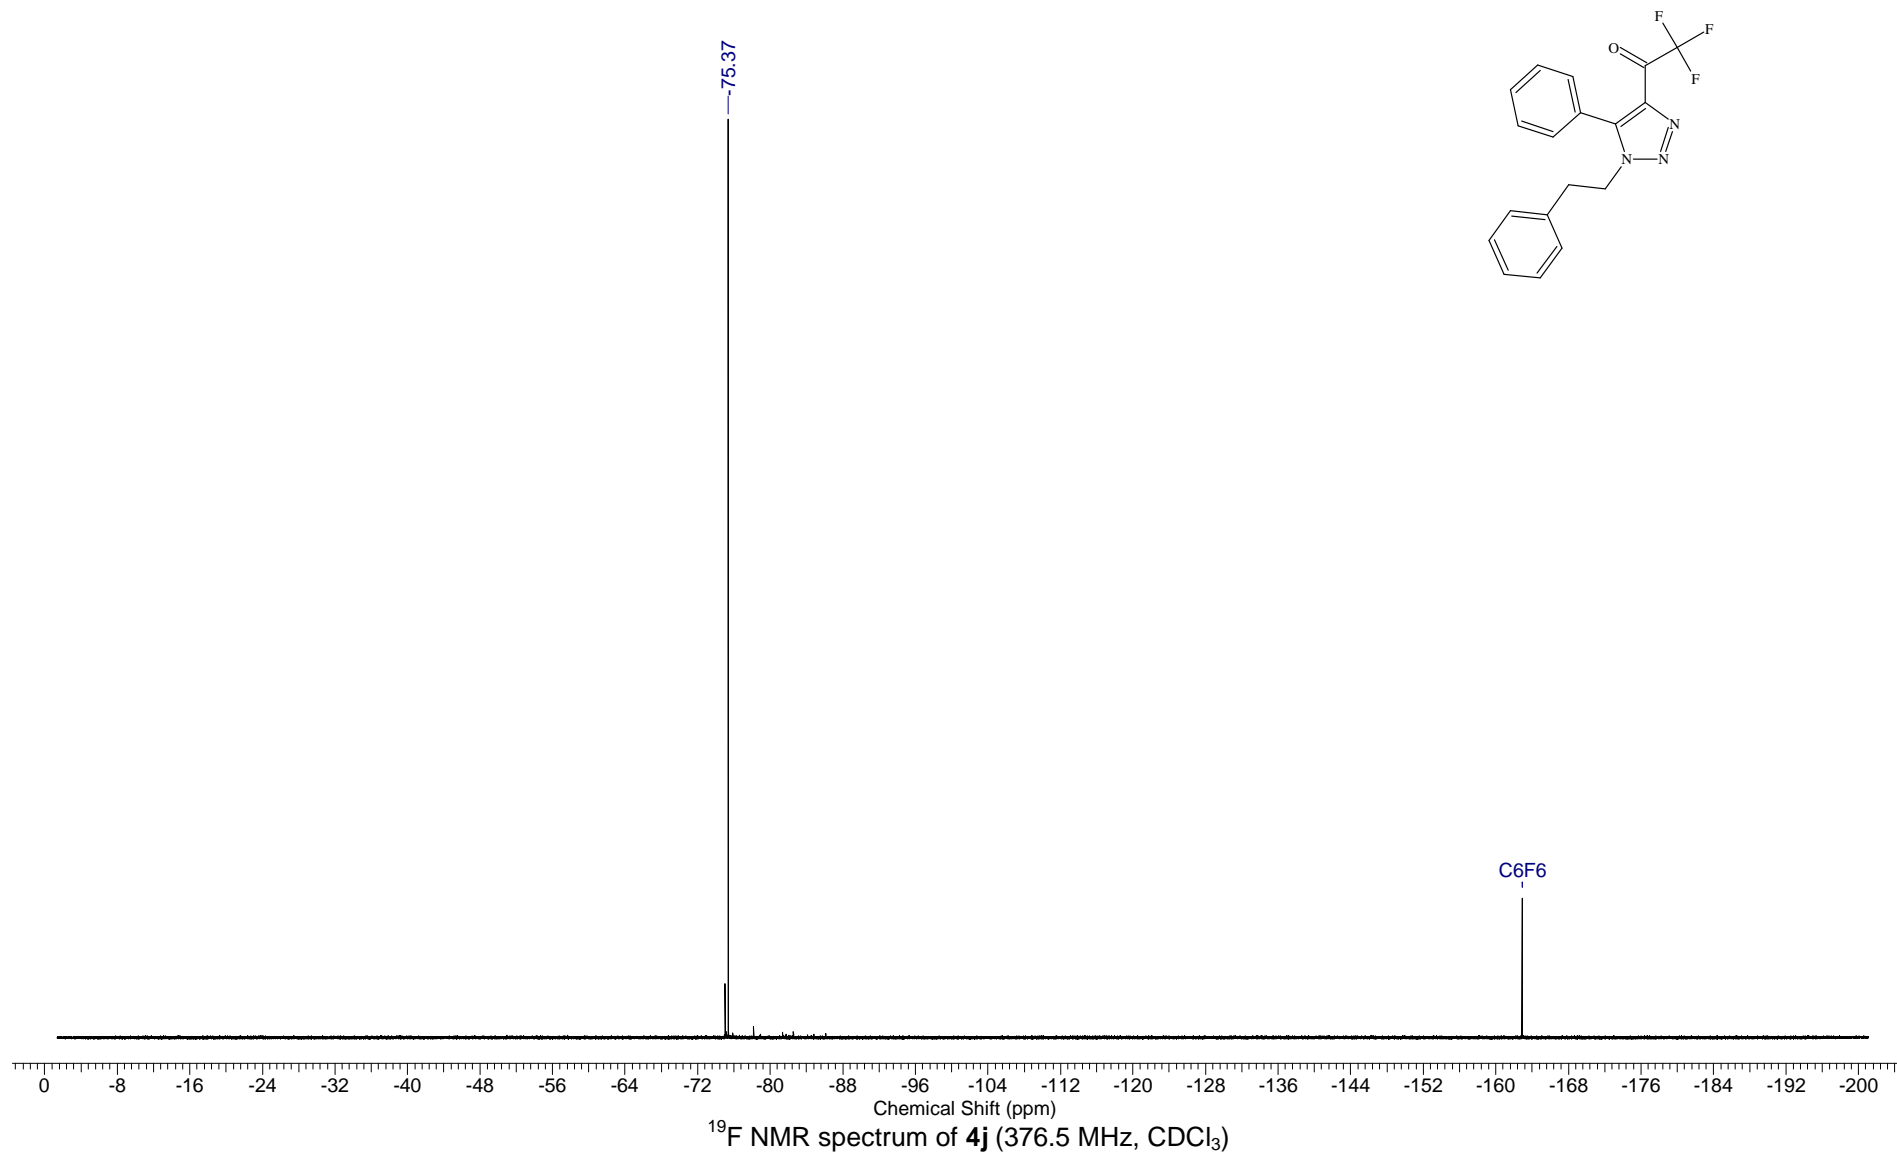

|                        |                                                       |                      |                      |                       |       |                  |                      |
|------------------------|-------------------------------------------------------|----------------------|----------------------|-----------------------|-------|------------------|----------------------|
| Acquisition Time (sec) | 4.0894                                                | Comment              | Imported from UXNMR. |                       |       | Date             | 08 Apr 2022 15:21:08 |
| File Name              | C:\DOCS\OUTPUT_301\2022\04.апрель\BM-2480-1.H_001001r |                      |                      |                       |       | Frequency (MHz)  | 400.13               |
| Nucleus                | 1H                                                    | Number of Transients | 4                    | Original Points Count | 32768 | Points Count     | 131072               |
| Pulse Sequence         | zg30                                                  | Solvent              | CHLOROFORM-D         |                       |       | Sweep Width (Hz) | 8012.82              |
| Temperature (degree C) | 27.000                                                |                      |                      |                       |       |                  |                      |

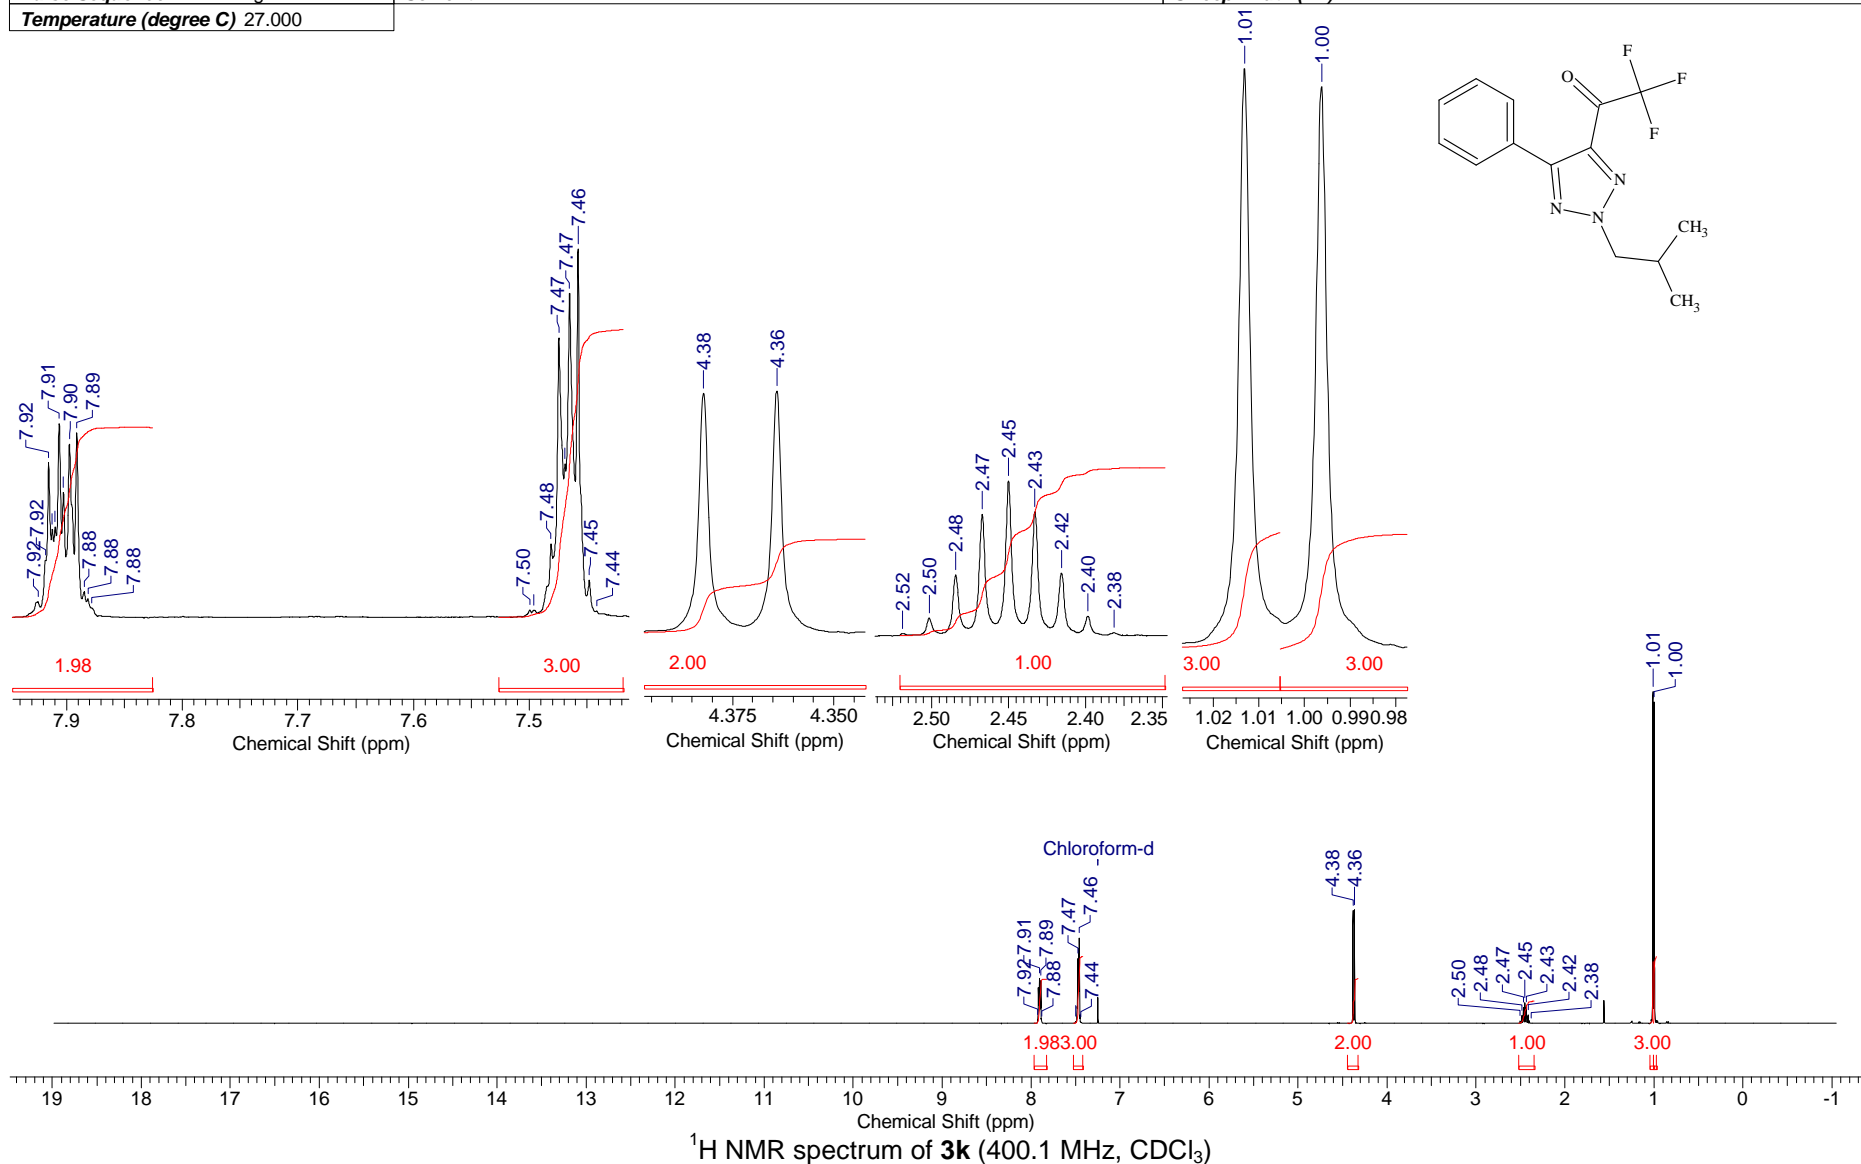

|                               |                                                       |                             |                      |                              |                      |
|-------------------------------|-------------------------------------------------------|-----------------------------|----------------------|------------------------------|----------------------|
| <b>Acquisition Time (sec)</b> | 1.7433                                                | <b>Comment</b>              | Imported from UXMNR. | <b>Date</b>                  | 08 Apr 2022 15:39:14 |
| <b>File Name</b>              | C:\DOCS\OUTPUT_301\2022\04.апрель\BM-2480-1.F_005001r | <b>Frequency (MHz)</b>      | 376.50               |                              |                      |
| <b>Nucleus</b>                | <sup>19</sup> F                                       | <b>Number of Transients</b> | 8                    | <b>Original Points Count</b> | 131072               |
| <b>Pulse Sequence</b>         | zgfgn                                                 | <b>Points Count</b>         | 262144               | <b>Sweep Width (Hz)</b>      | 75187.97             |
| <b>Temperature (degree C)</b> | 27.000                                                | <b>Solvent</b>              | CHLOROFORM-D         |                              |                      |

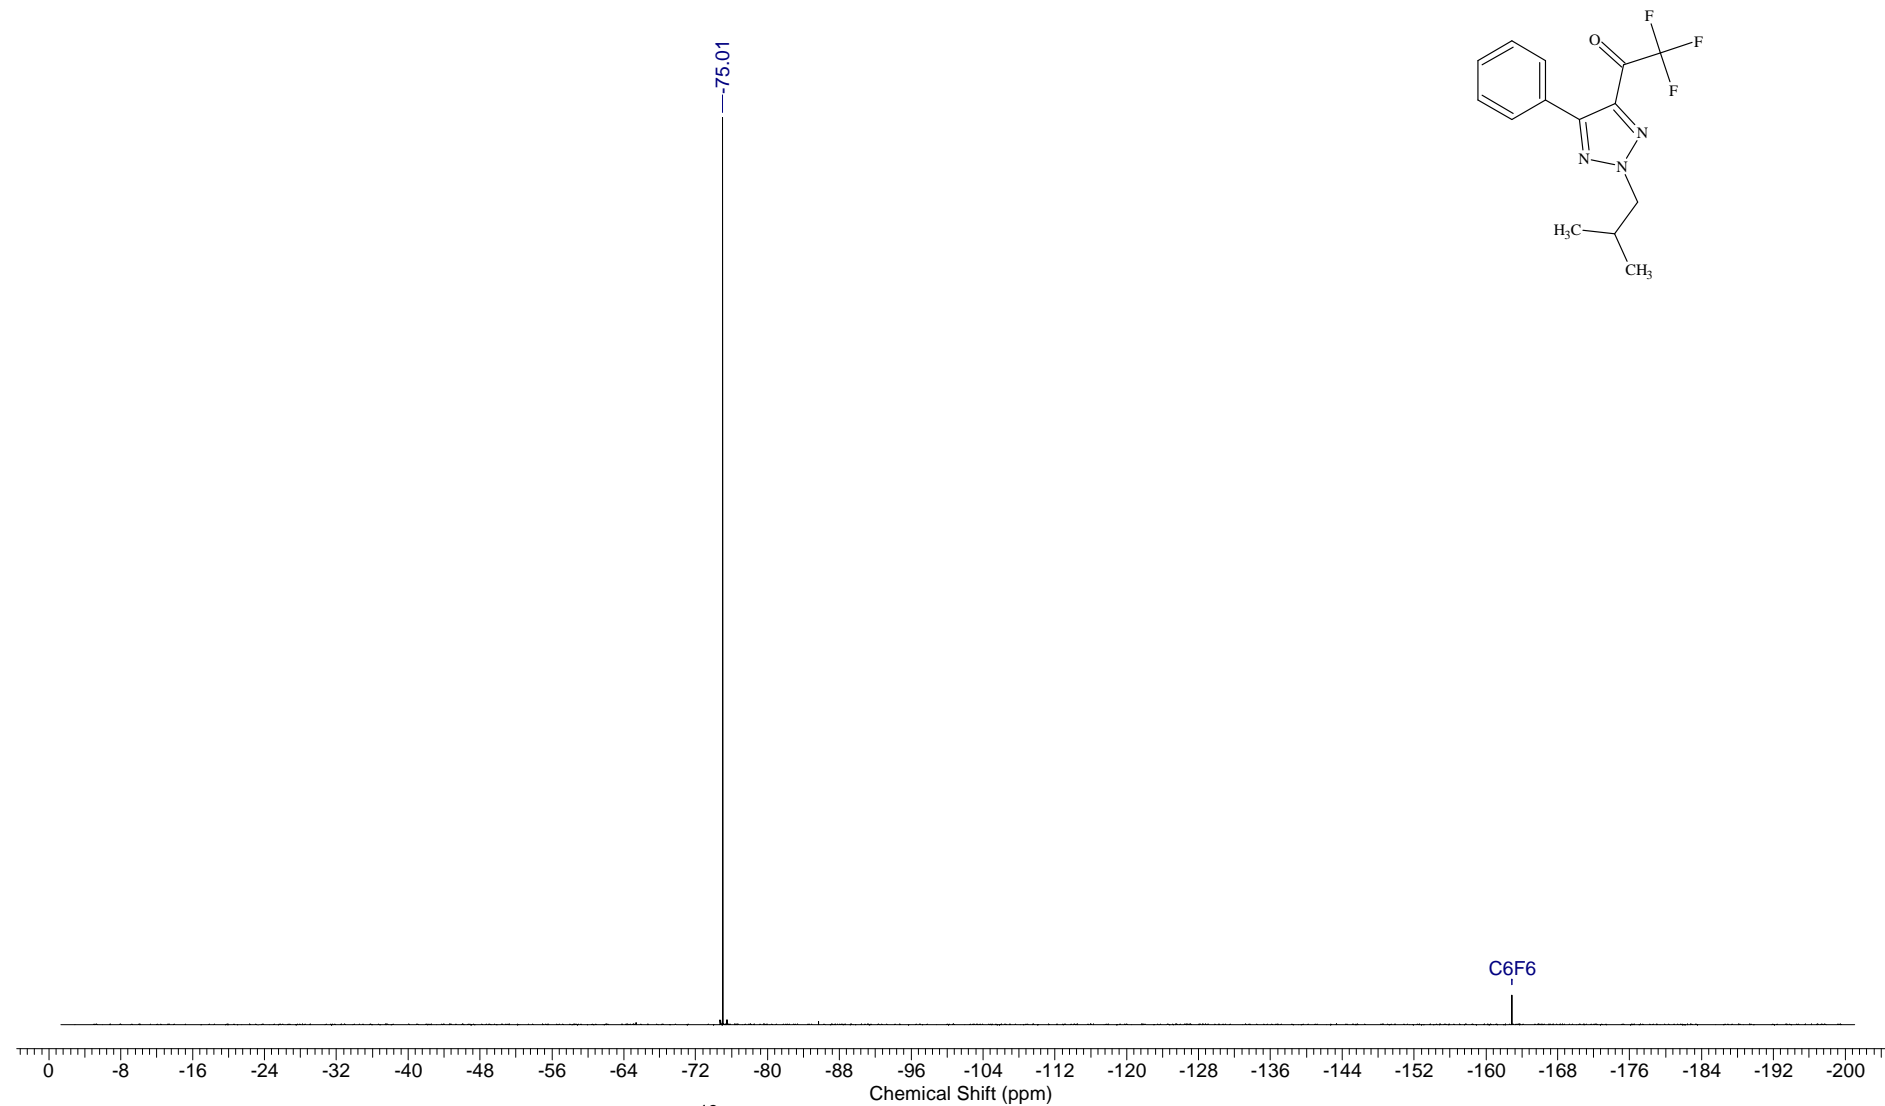

|                        |                                                        |                      |                      |                       |                  |                      |        |
|------------------------|--------------------------------------------------------|----------------------|----------------------|-----------------------|------------------|----------------------|--------|
| Acquisition Time (sec) | 0.6783                                                 | Comment              | Imported from UXNMR. |                       | Date             | 09 Apr 2022 13:45:48 |        |
| File Name              | C:\DOCS\BM\ЯMP_COCE\ДИ\2022\bm220409\BM-2480-1_002001r |                      |                      |                       | Frequency (MHz)  | 100.61               |        |
| Nucleus                | 13C                                                    | Number of Transients | 192                  | Original Points Count | 16384            | Points Count         | 131072 |
| Pulse Sequence         | zgpg30                                                 | Solvent              | CHLOROFORM-D         |                       | Sweep Width (Hz) | 24154.59             |        |
| Temperature (degree C) | 27.000                                                 |                      |                      |                       |                  |                      |        |

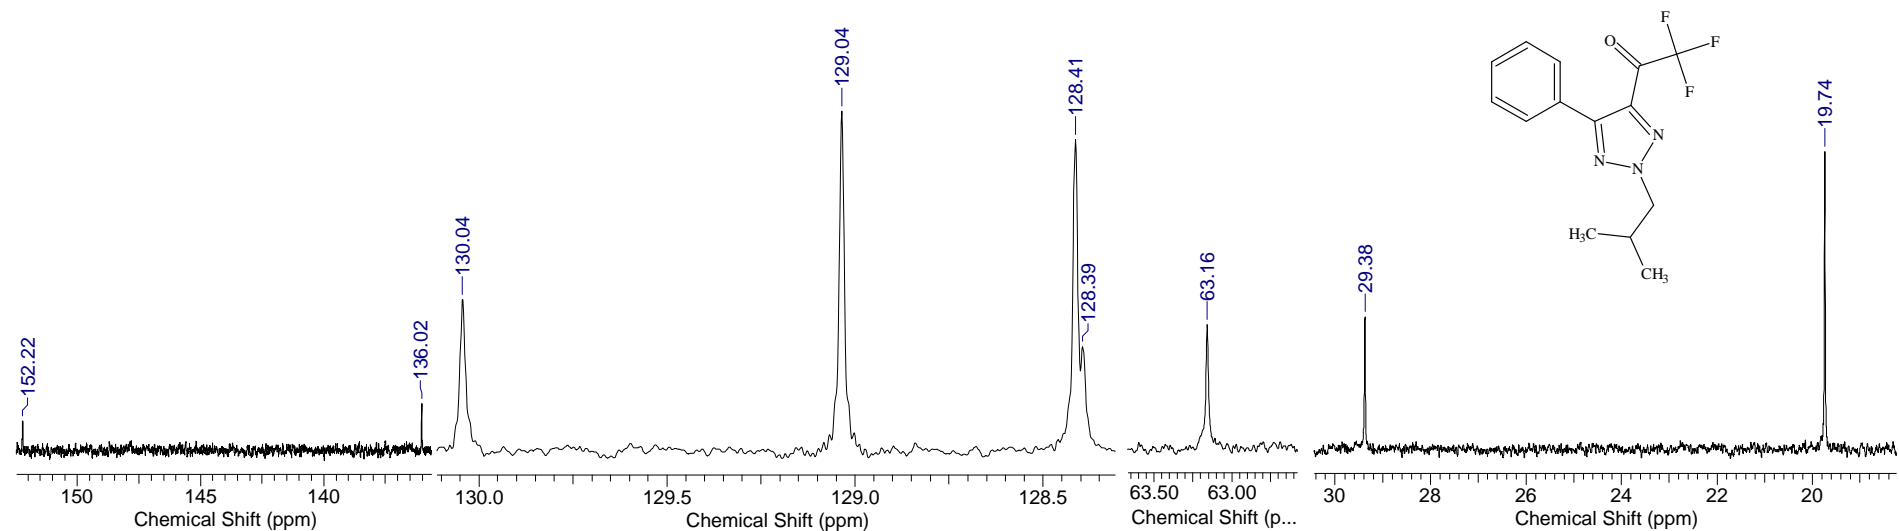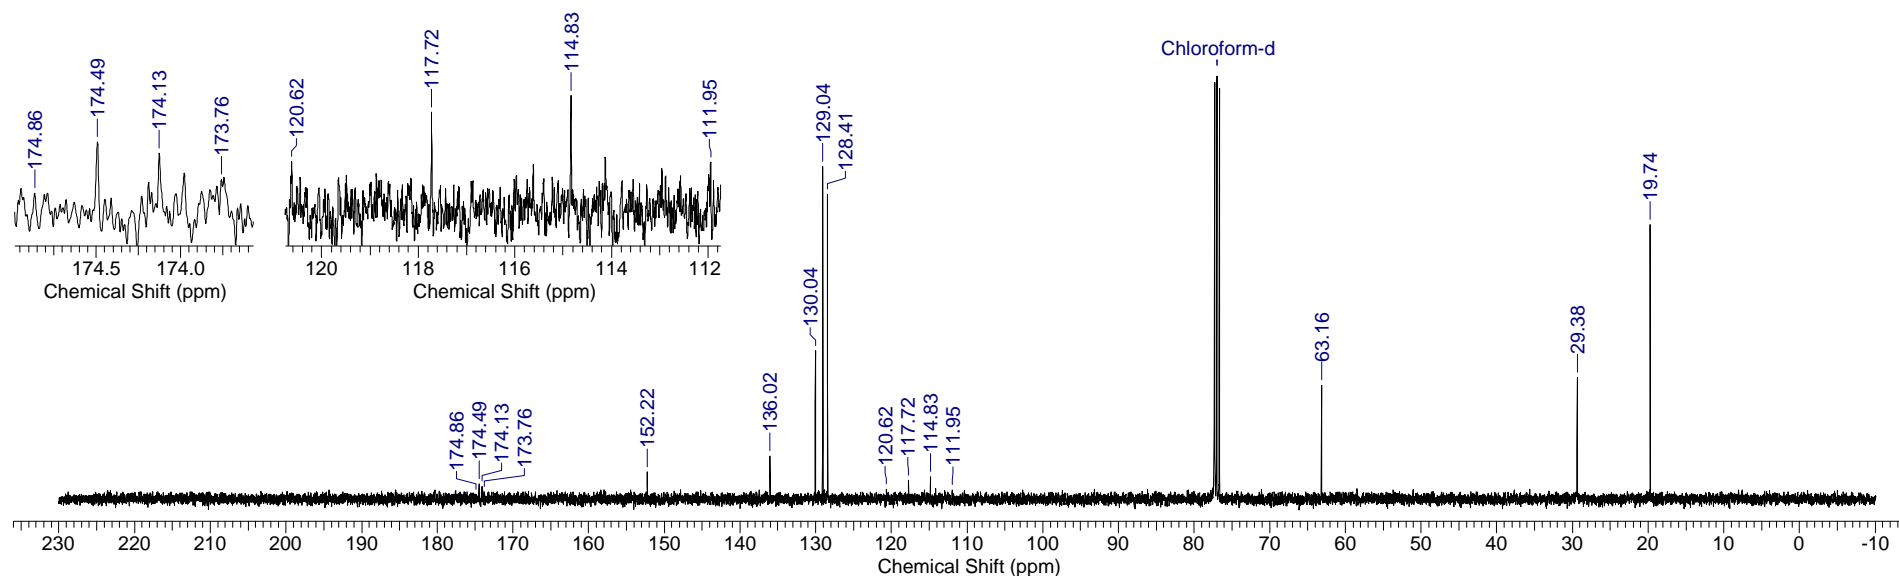<sup>13</sup>C{<sup>1</sup>H} NMR spectrum of **3k** (100.6 MHz, CDCl<sub>3</sub>)

|                               |                                                       |                             |                      |                              |                         |                      |        |
|-------------------------------|-------------------------------------------------------|-----------------------------|----------------------|------------------------------|-------------------------|----------------------|--------|
| <b>Acquisition Time (sec)</b> | 4.0894                                                | <b>Comment</b>              | Imported from UXNMR. |                              | <b>Date</b>             | 08 Apr 2022 15:22:48 |        |
| <b>File Name</b>              | C:\DOCS\OUTPUT_301\2022\04.апрель\BM-2480-3.H_001001r |                             |                      |                              | <b>Frequency (MHz)</b>  | 400.13               |        |
| <b>Nucleus</b>                | 1H                                                    | <b>Number of Transients</b> | 4                    | <b>Original Points Count</b> | 32768                   | <b>Points Count</b>  | 131072 |
| <b>Pulse Sequence</b>         | zg30                                                  | <b>Solvent</b>              | CHLOROFORM-D         |                              | <b>Sweep Width (Hz)</b> | 8012.82              |        |
| <b>Temperature (degree C)</b> | 27.000                                                |                             |                      |                              |                         |                      |        |

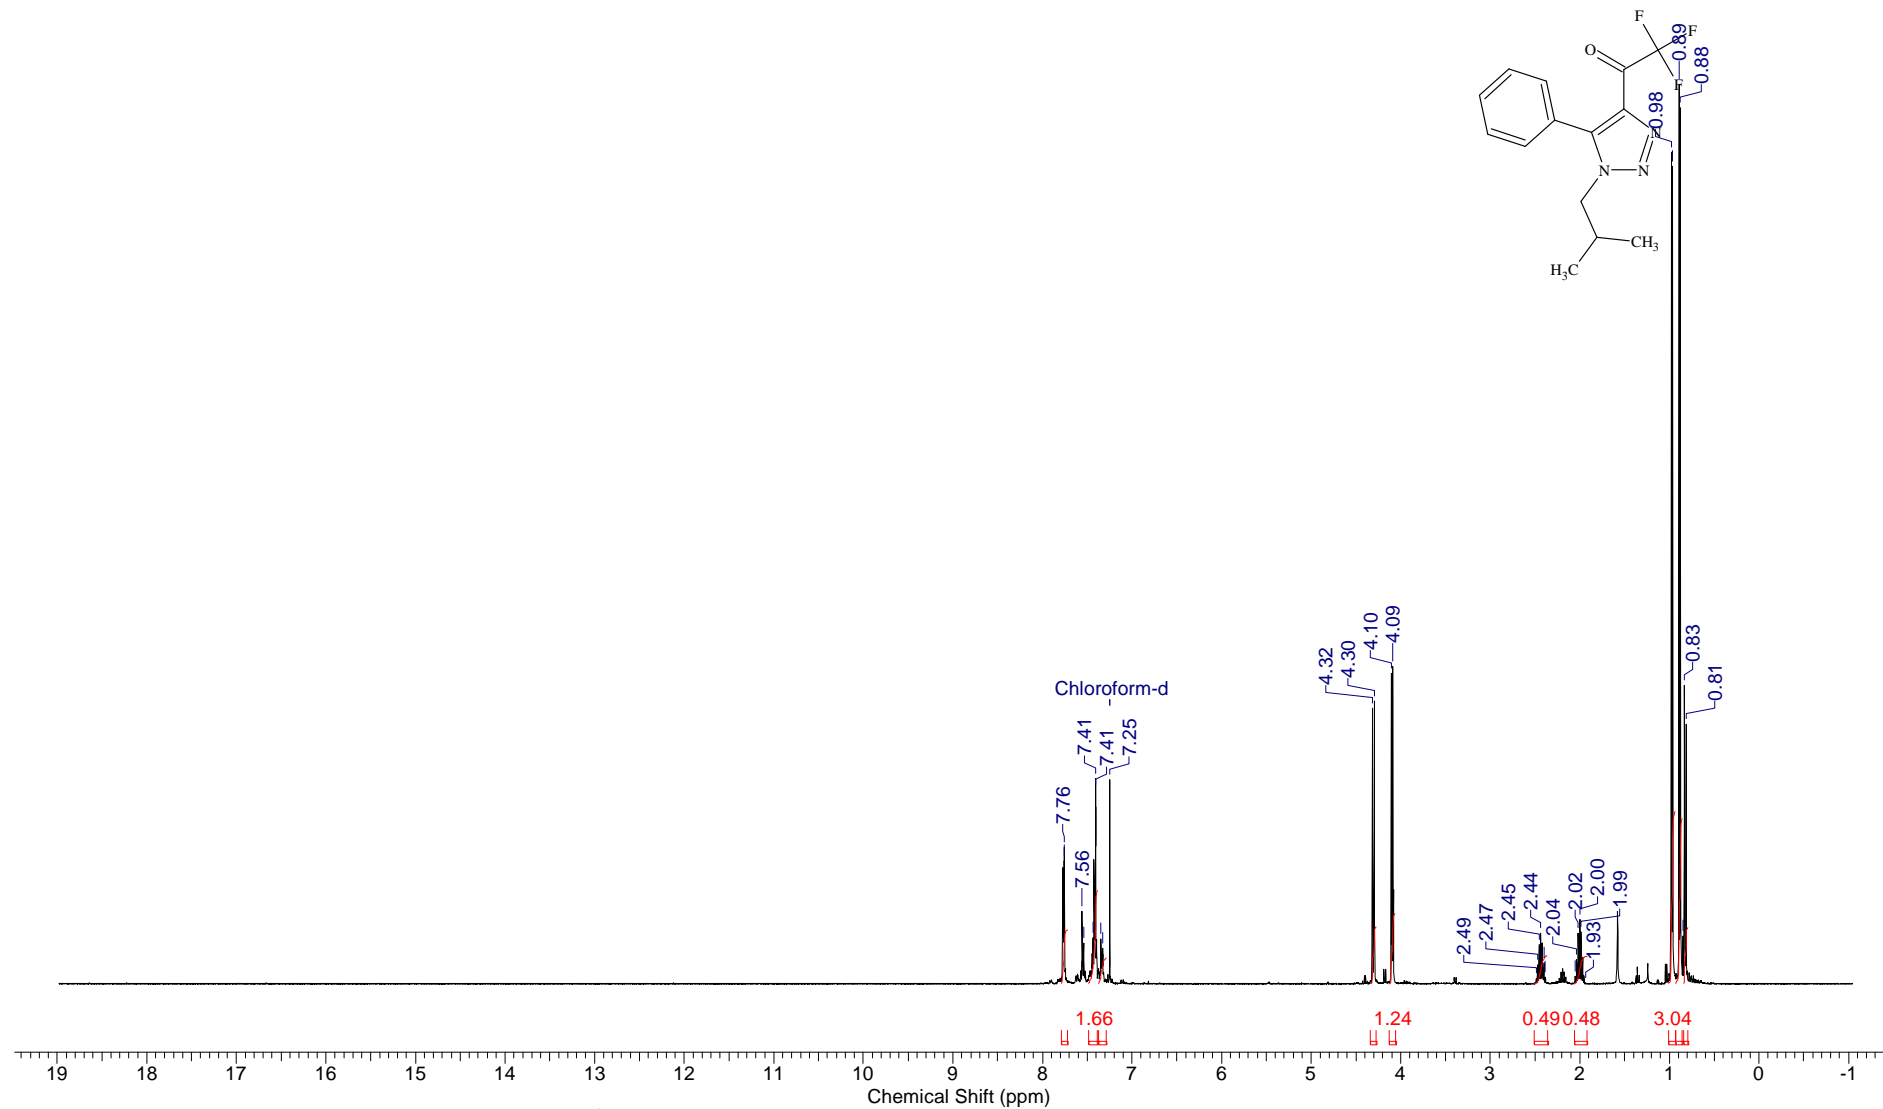

<sup>1</sup>H NMR spectrum of mixture of **3k** and **4k** (400.1 MHz, CDCl<sub>3</sub>)

|                               |                                                       |                             |                      |                              |                      |
|-------------------------------|-------------------------------------------------------|-----------------------------|----------------------|------------------------------|----------------------|
| <b>Acquisition Time (sec)</b> | 1.7433                                                | <b>Comment</b>              | Imported from UXNMR. | <b>Date</b>                  | 08 Apr 2022 15:40:58 |
| <b>File Name</b>              | C:\DOCS\OUTPUT_301\2022\04.апрель\BM-2480-3.F_005001r |                             |                      | <b>Frequency (MHz)</b>       | 376.50               |
| <b>Nucleus</b>                | <sup>19</sup> F                                       | <b>Number of Transients</b> | 12                   | <b>Original Points Count</b> | 131072               |
| <b>Pulse Sequence</b>         | zgfgn                                                 | <b>Solvent</b>              | CHLOROFORM-D         | <b>Points Count</b>          | 262144               |
| <b>Temperature (degree C)</b> | 27.000                                                |                             |                      | <b>Sweep Width (Hz)</b>      | 75187.97             |

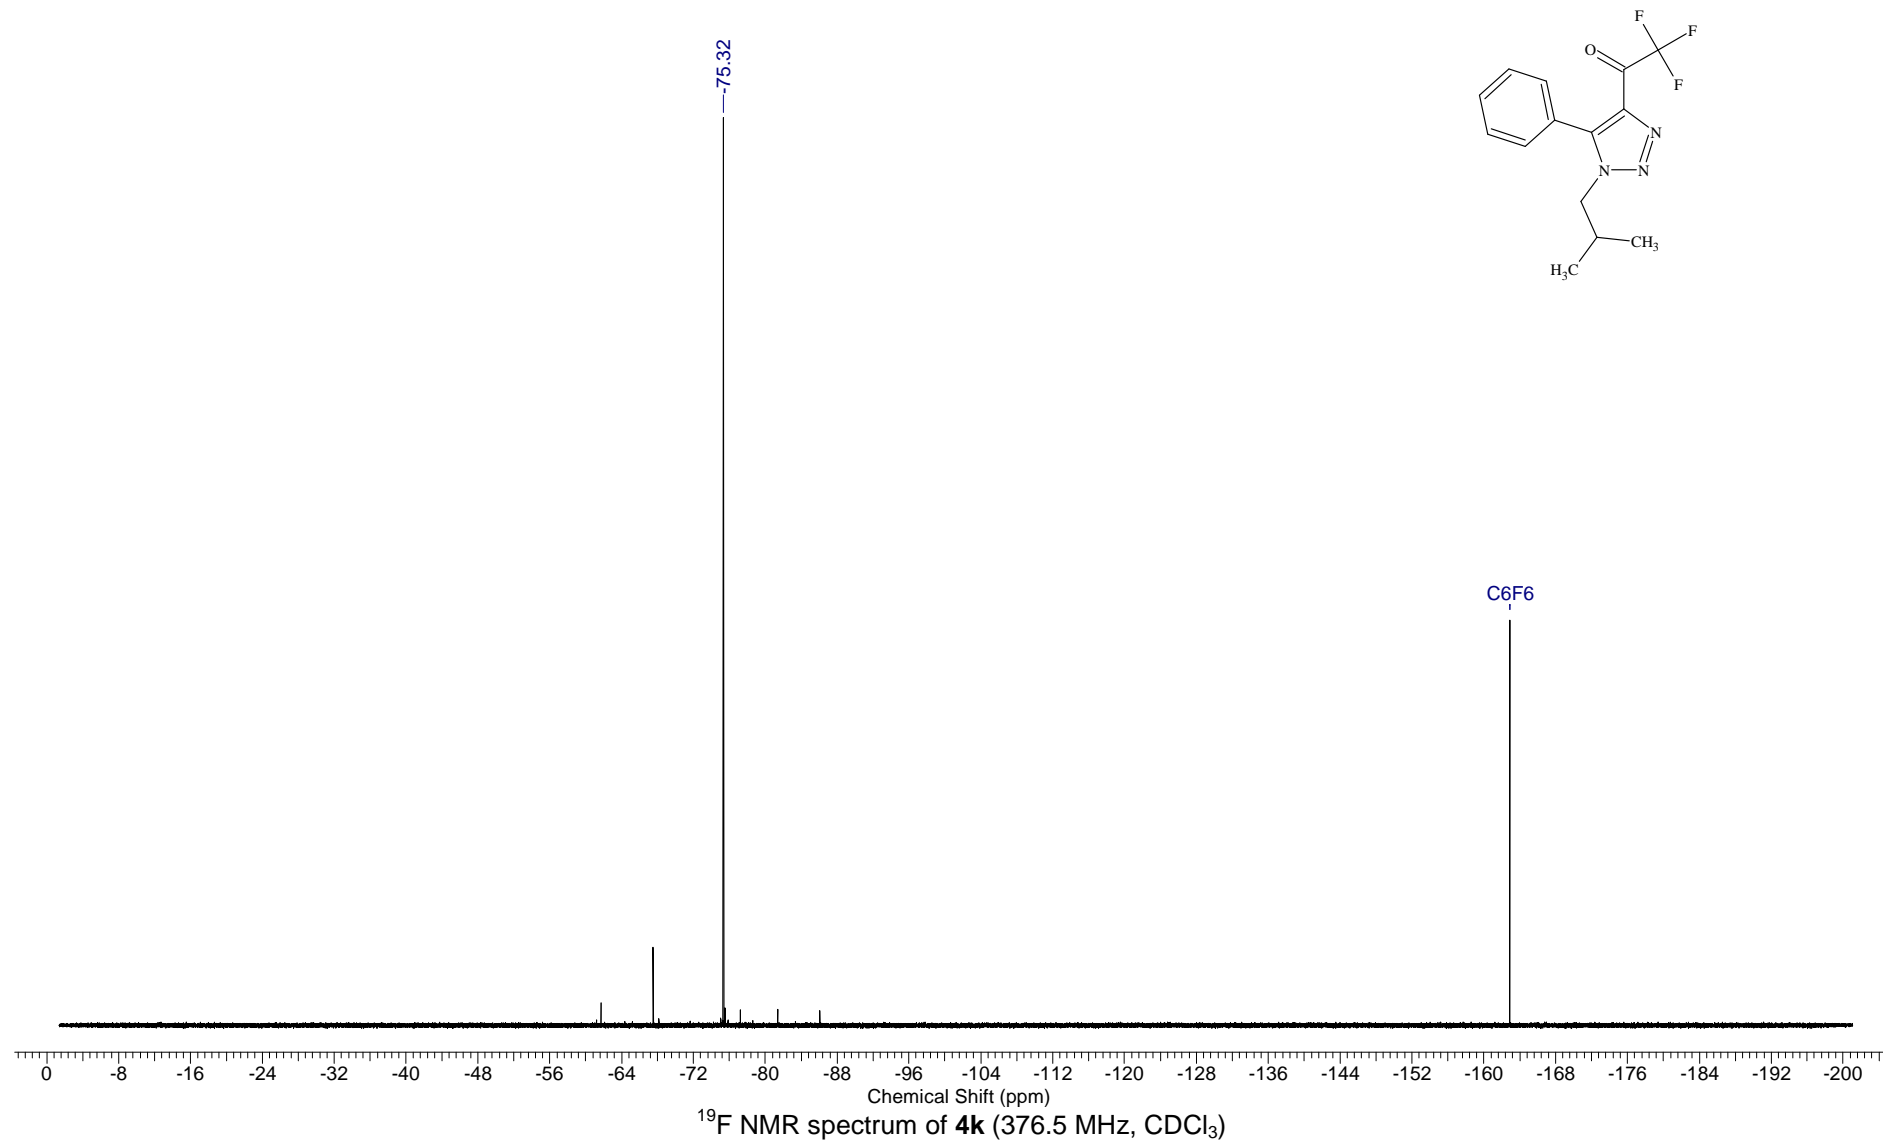

|                        |                                                       |                      |                      |                       |       |                  |                      |        |  |  |
|------------------------|-------------------------------------------------------|----------------------|----------------------|-----------------------|-------|------------------|----------------------|--------|--|--|
| Acquisition Time (sec) | 4.0894                                                | Comment              | Imported from UXNMR. |                       |       | Date             | 07 Apr 2022 11:38:38 |        |  |  |
| File Name              | C:\DOCS\OUTPUT_301\2022\04.апрель\BM-2476-1.H_001001r |                      |                      |                       |       |                  | Frequency (MHz)      | 400.13 |  |  |
| Nucleus                | 1H                                                    | Number of Transients | 4                    | Original Points Count | 32768 | Points Count     | 131072               |        |  |  |
| Pulse Sequence         | zg30                                                  | Solvent              | CHLOROFORM-D         |                       |       | Sweep Width (Hz) | 8012.82              |        |  |  |
| Temperature (degree C) | 27.000                                                |                      |                      |                       |       |                  |                      |        |  |  |

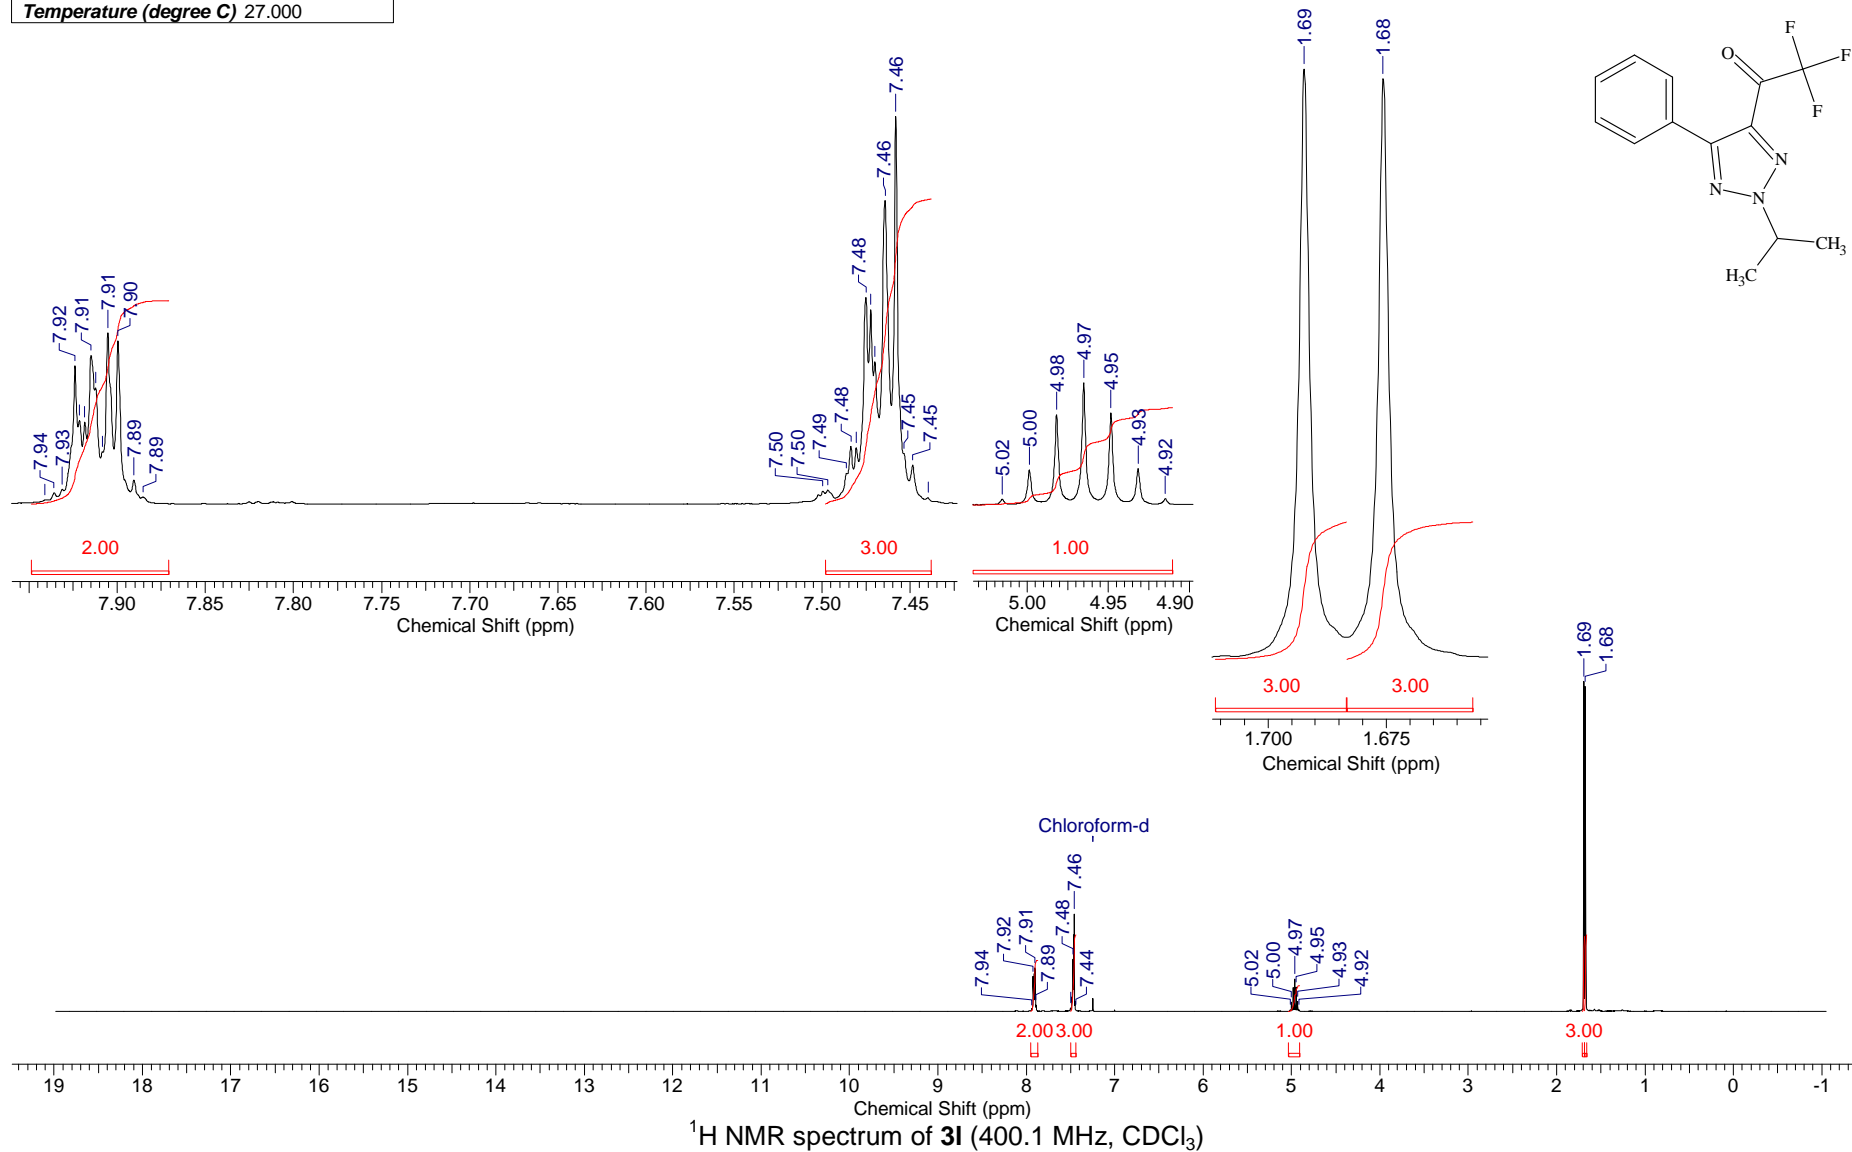



|                        |                                                       |                      |                      |                       |        |                  |                      |
|------------------------|-------------------------------------------------------|----------------------|----------------------|-----------------------|--------|------------------|----------------------|
| Acquisition Time (sec) | 1.7433                                                | Comment              | Imported from UXNMR. |                       |        | Date             | 07 Apr 2022 12:13:14 |
| File Name              | C:\DOCS\OUTPUT_301\2022\04.апрель\BM-2476-1.F_005001r |                      |                      |                       |        | Frequency (MHz)  | 376.50               |
| Nucleus                | 19F                                                   | Number of Transients | 16                   | Original Points Count | 131072 | Points Count     | 262144               |
| Pulse Sequence         | zgfgqn                                                | Solvent              | CHLOROFORM-D         |                       |        | Sweep Width (Hz) | 75187.97             |
| Temperature (degree C) | 27.000                                                |                      |                      |                       |        |                  |                      |

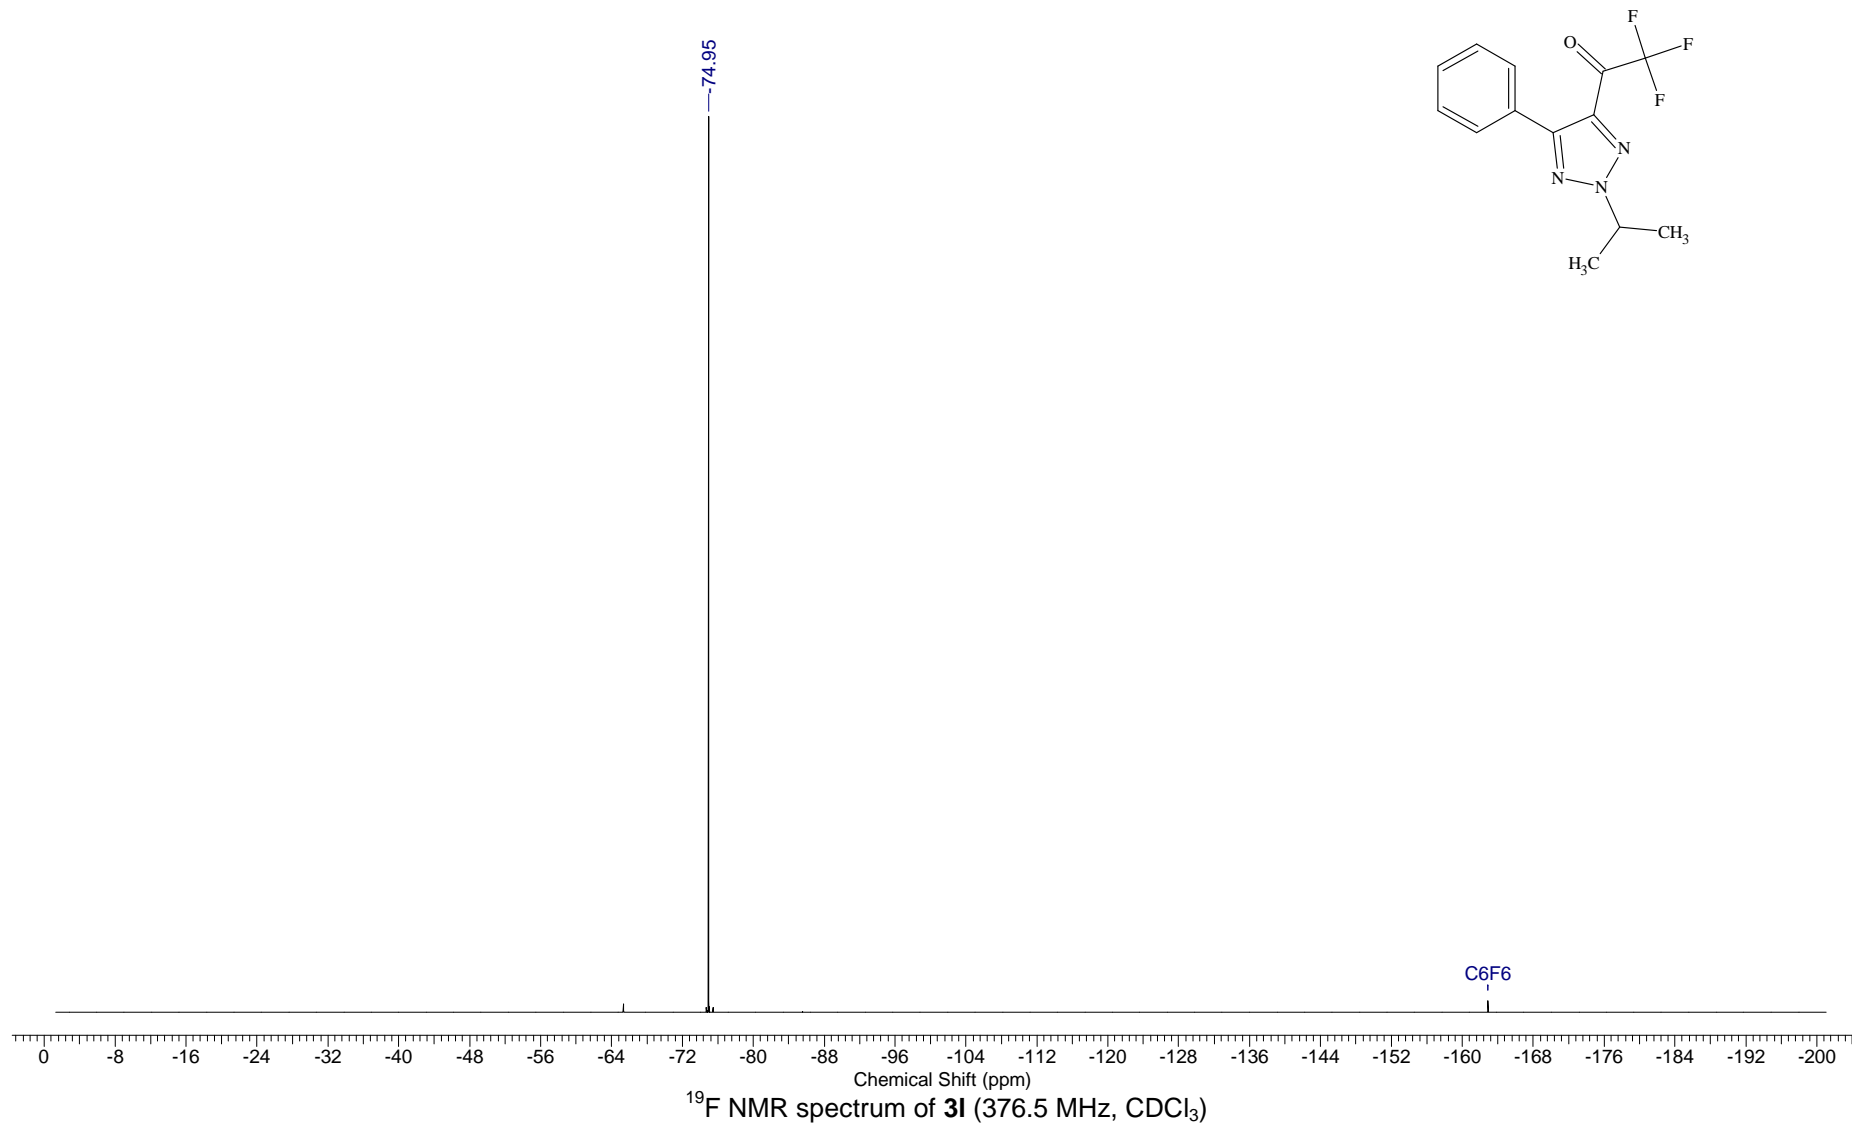

|                        |                                                       |                      |                      |                       |                  |                      |        |
|------------------------|-------------------------------------------------------|----------------------|----------------------|-----------------------|------------------|----------------------|--------|
| Acquisition Time (sec) | 0.6783                                                | Comment              | Imported from UXNMR. |                       | Date             | 07 Apr 2022 11:54:10 |        |
| File Name              | C:\DOCS\OUTPUT_301\2022\04.апрель\BM-2476-1.C_002001r |                      |                      |                       | Frequency (MHz)  | 100.61               |        |
| Nucleus                | 13C                                                   | Number of Transients | 361                  | Original Points Count | 16384            | Points Count         | 131072 |
| Pulse Sequence         | zgpg30                                                | Solvent              | CHLOROFORM-D         |                       | Sweep Width (Hz) | 24154.59             |        |
| Temperature (degree C) | 27.000                                                |                      |                      |                       |                  |                      |        |

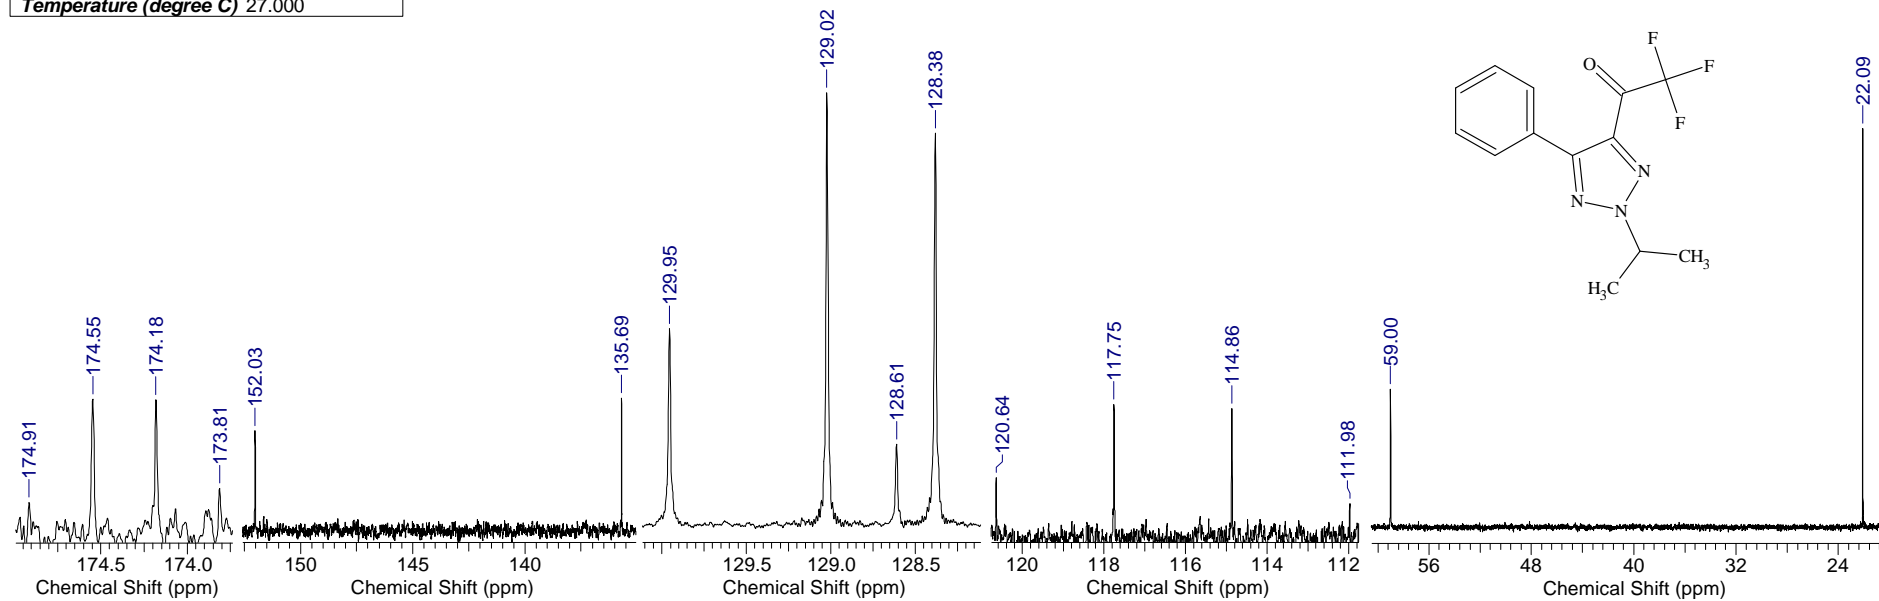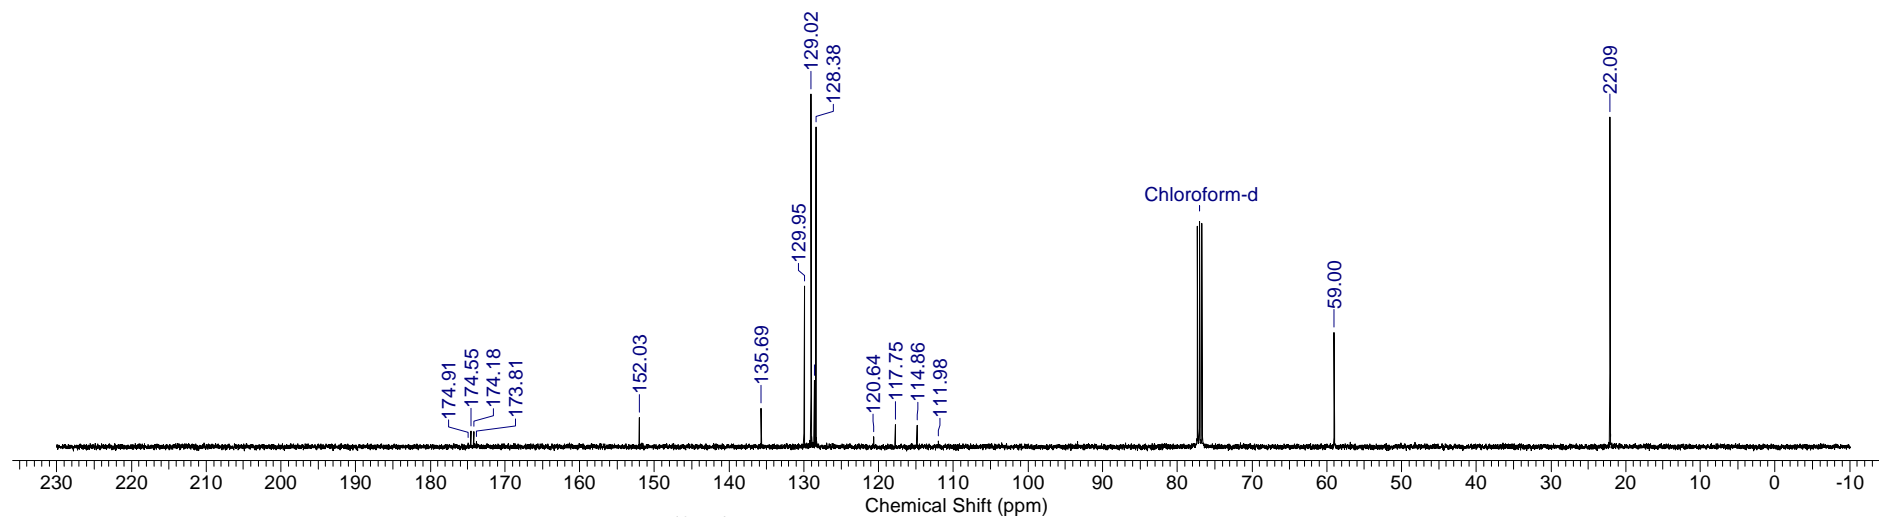 $^{13}\text{C}\{^1\text{H}\}$  NMR spectrum of **3I** (100.6 MHz,  $\text{CDCl}_3$ )

|                        |                                                       |                      |                      |                       |       |                  |                      |
|------------------------|-------------------------------------------------------|----------------------|----------------------|-----------------------|-------|------------------|----------------------|
| Acquisition Time (sec) | 4.0894                                                | Comment              | Imported from UXMNR. |                       |       | Date             | 06 Apr 2022 17:08:52 |
| File Name              | C:\DOCS\OUTPUT_301\2022\04.апрель\BM-2476-2.H_001001r |                      |                      |                       |       | Frequency (MHz)  | 400.13               |
| Nucleus                | 1H                                                    | Number of Transients | 4                    | Original Points Count | 32768 | Points Count     | 131072               |
| Pulse Sequence         | zg30                                                  | Solvent              | CHLOROFORM-D         |                       |       | Sweep Width (Hz) | 8012.82              |
| Temperature (degree C) | 27.000                                                |                      |                      |                       |       |                  |                      |

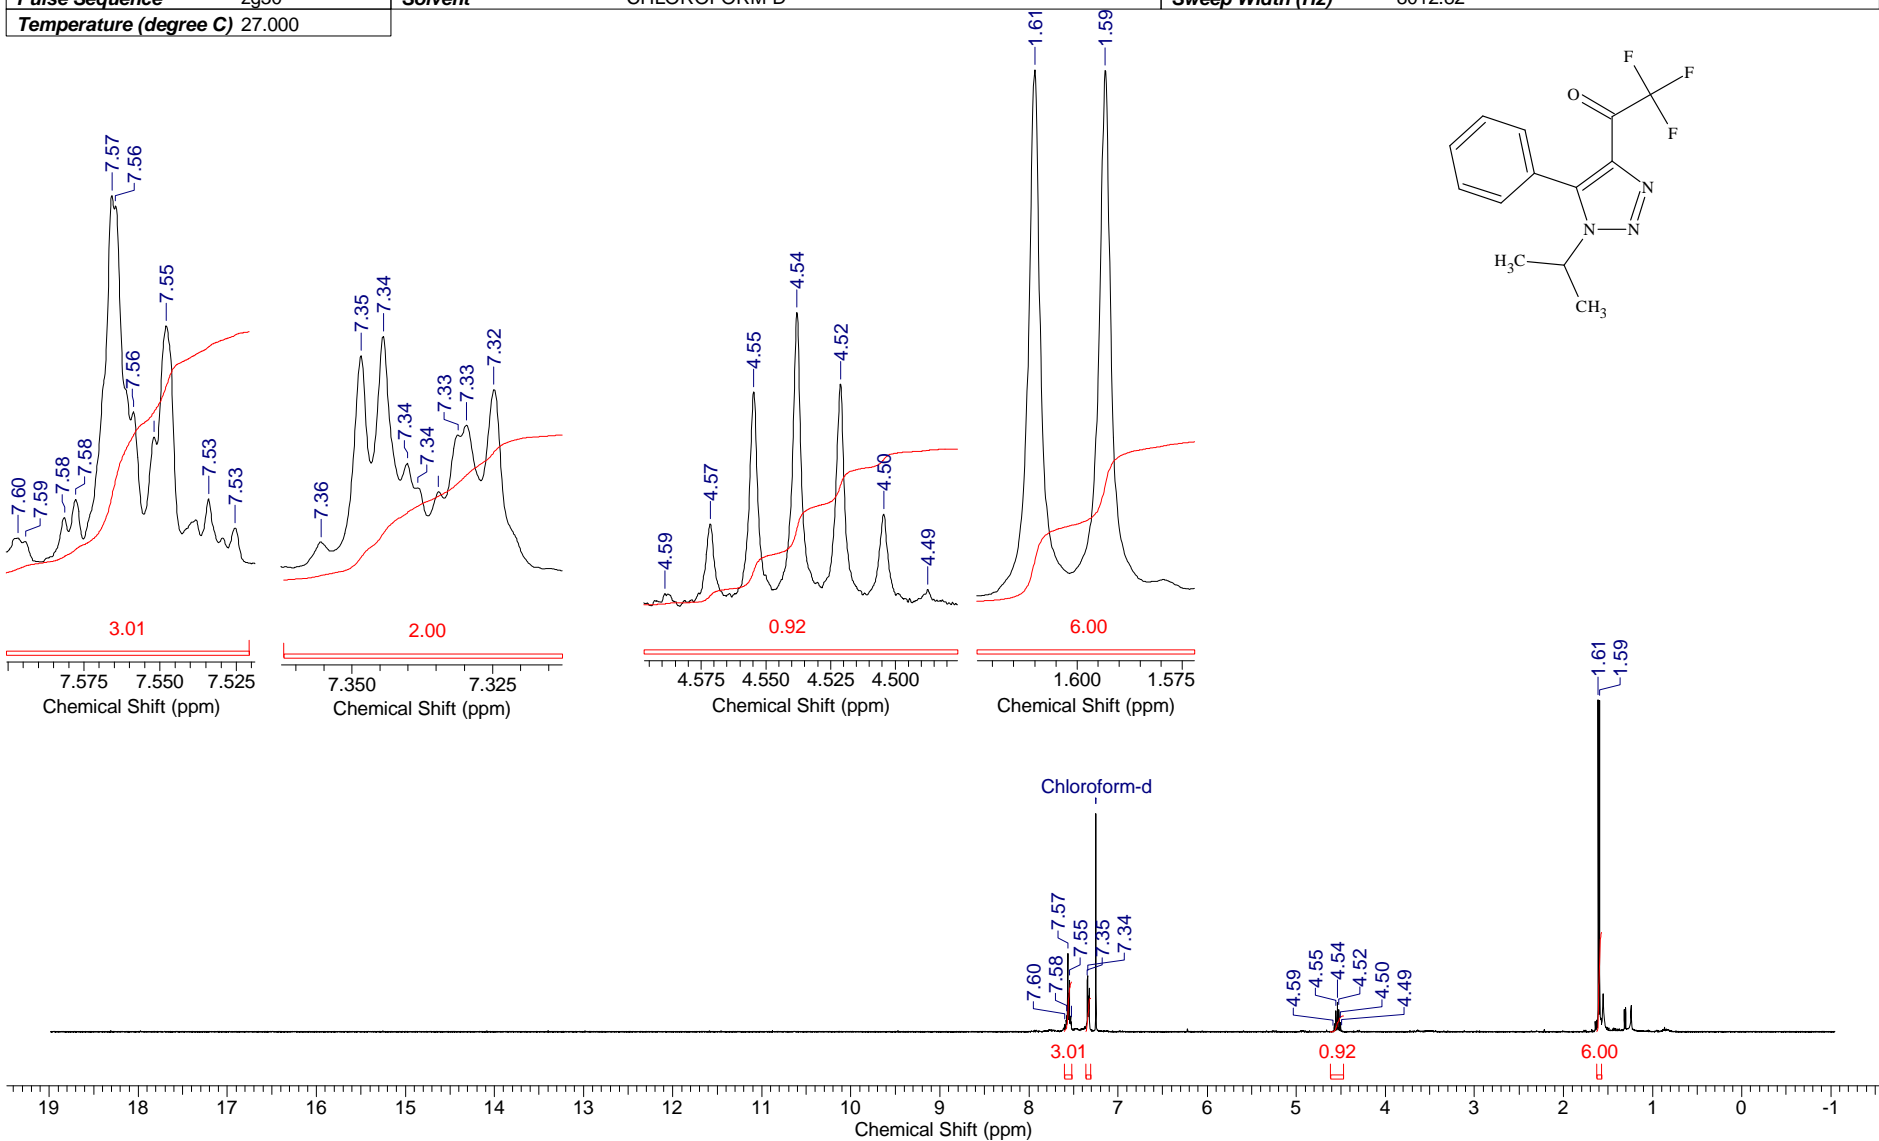<sup>1</sup>H NMR spectrum of **4l** (400.1 MHz, CDCl<sub>3</sub>)

|                        |                                                       |                      |                      |                       |                  |                      |        |
|------------------------|-------------------------------------------------------|----------------------|----------------------|-----------------------|------------------|----------------------|--------|
| Acquisition Time (sec) | 1.7433                                                | Comment              | Imported from UXNMR. |                       | Date             | 06 Apr 2022 17:40:20 |        |
| File Name              | C:\DOCS\OUTPUT_301\2022\04.апрель\BM-2476-2.F_005001r |                      |                      |                       | Frequency (MHz)  | 376.50               |        |
| Nucleus                | 19F                                                   | Number of Transients | 16                   | Original Points Count | 131072           | Points Count         | 262144 |
| Pulse Sequence         | zgfgn                                                 | Solvent              | CHLOROFORM-D         |                       | Sweep Width (Hz) | 75187.97             |        |
| Temperature (degree C) | 27.000                                                |                      |                      |                       |                  |                      |        |

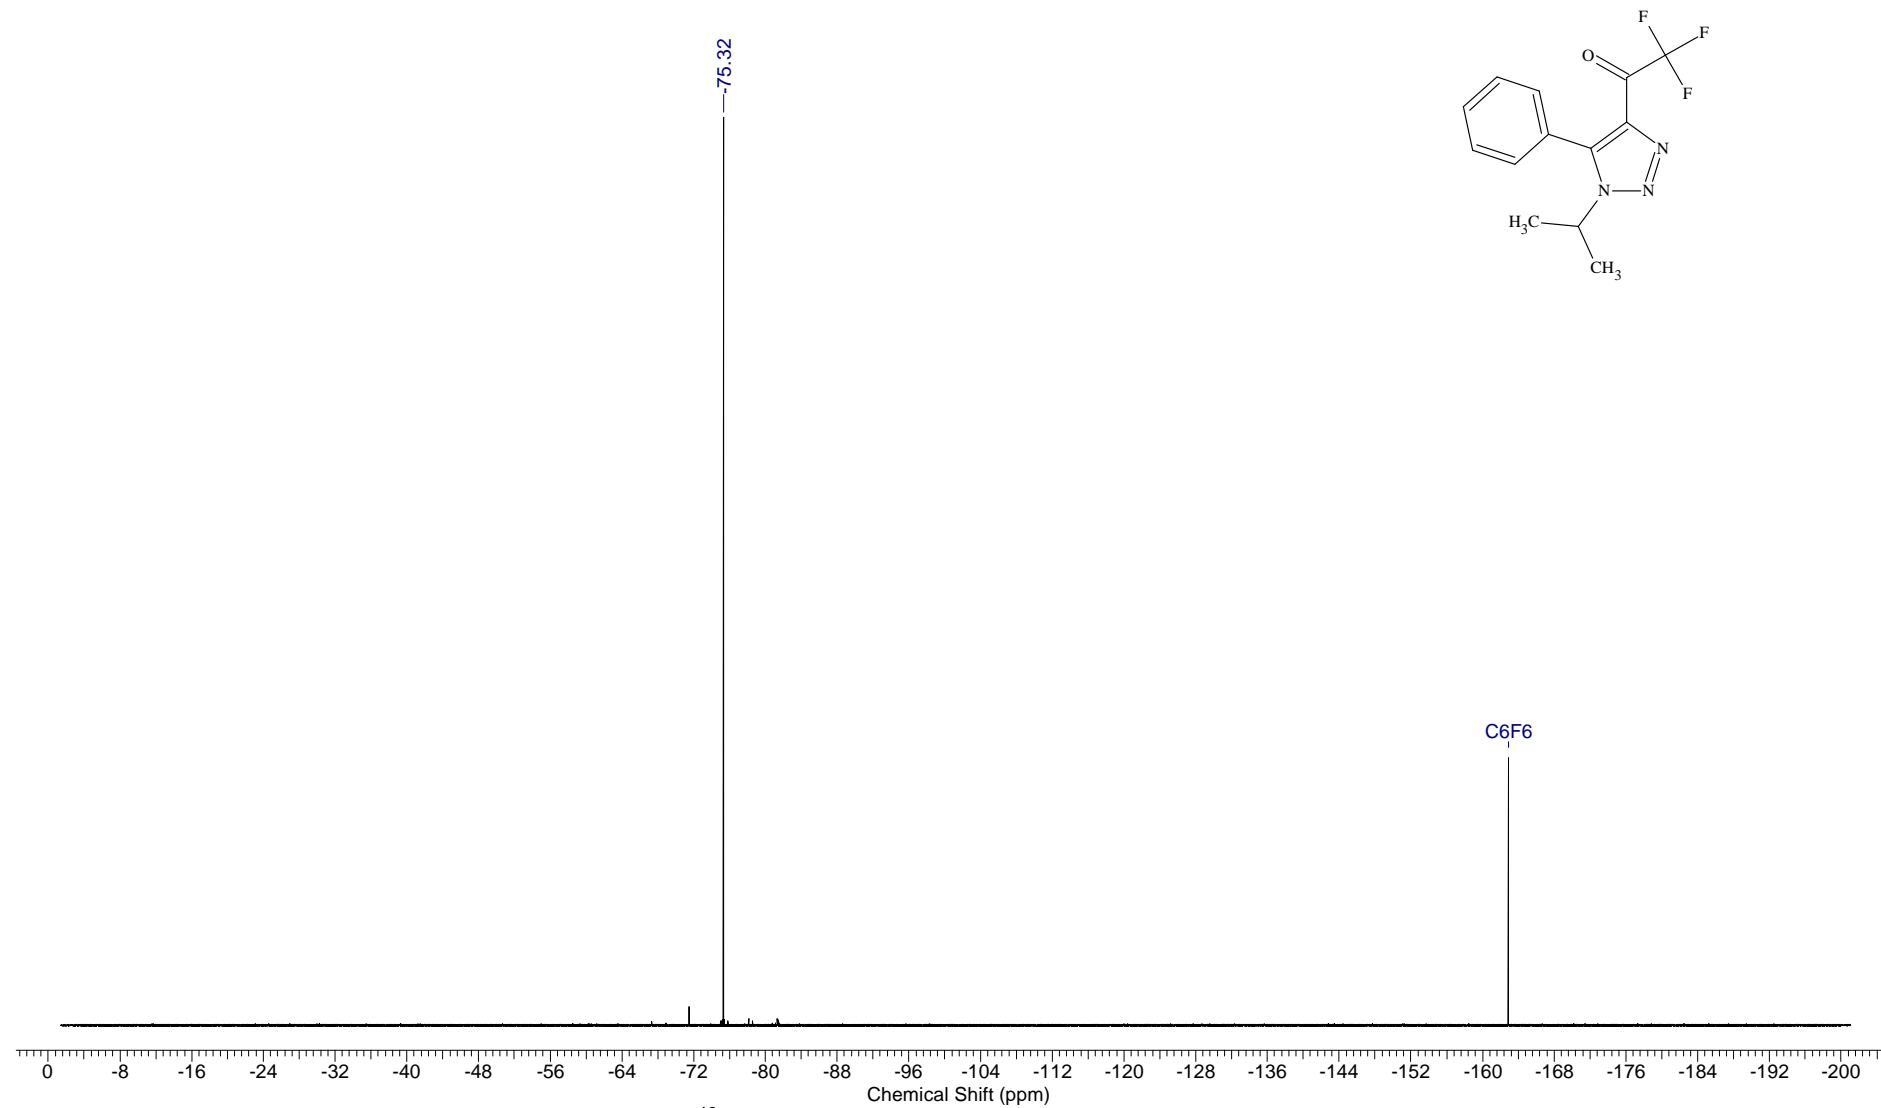

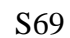

|                        |                                                         |                      |                      |                       |                  |                      |        |
|------------------------|---------------------------------------------------------|----------------------|----------------------|-----------------------|------------------|----------------------|--------|
| Acquisition Time (sec) | 1.7433                                                  | Comment              | Imported from UXNMR. |                       | Date             | 28 Jun 2022 14:47:14 |        |
| File Name              | C:\DOCS\OUTPUT_301\2022\06.июнь\SZA-BM-2538-4.F_005001r |                      |                      |                       | Frequency (MHz)  | 376.50               |        |
| Nucleus                | 19F                                                     | Number of Transients | 16                   | Original Points Count | 131072           | Points Count         | 262144 |
| Pulse Sequence         | zgfgqn                                                  | Solvent              | CHLOROFORM-D         |                       | Sweep Width (Hz) | 75187.97             |        |
| Temperature (degree C) | 27.000                                                  |                      |                      |                       |                  |                      |        |

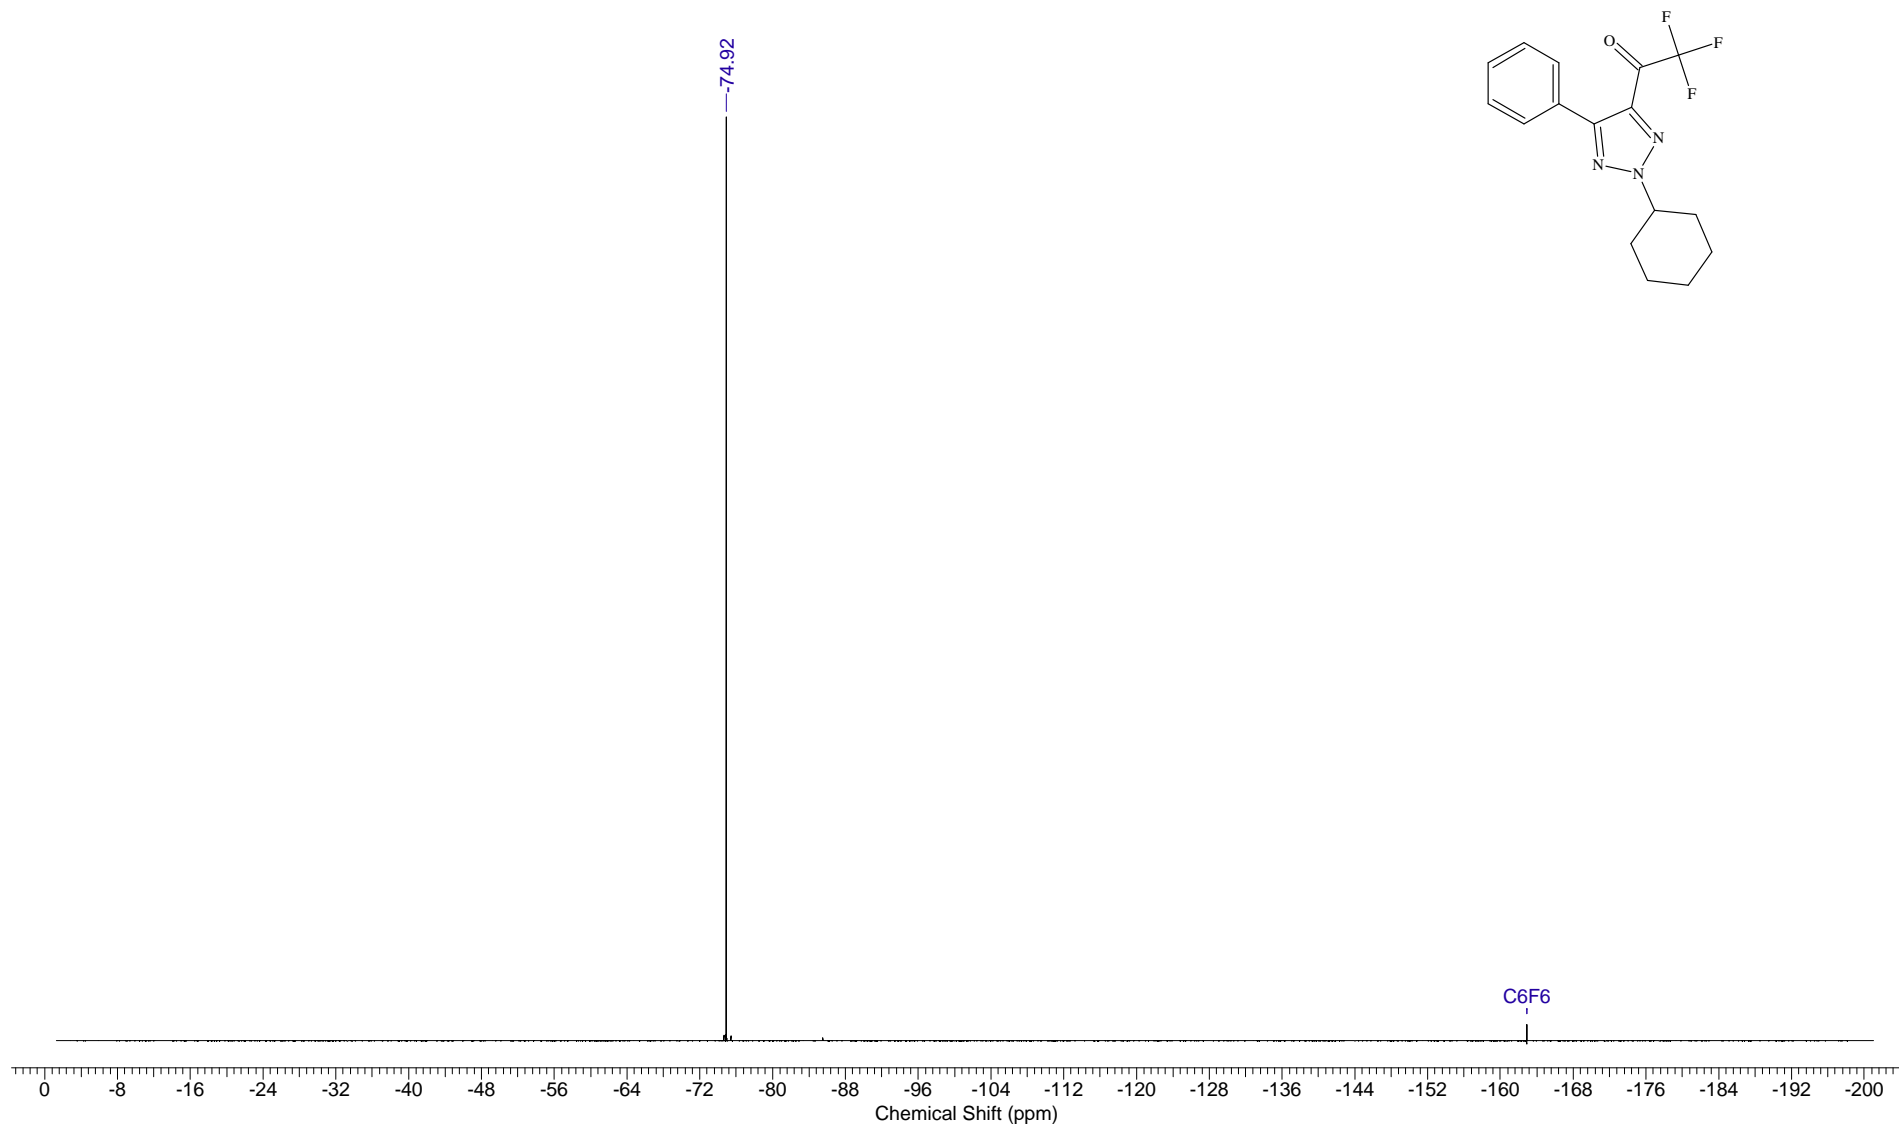

|                               |                                                         |                             |                      |                              |                         |                      |        |
|-------------------------------|---------------------------------------------------------|-----------------------------|----------------------|------------------------------|-------------------------|----------------------|--------|
| <b>Acquisition Time (sec)</b> | 0.6783                                                  | <b>Comment</b>              | Imported from UXNMR. |                              | <b>Date</b>             | 29 Jun 2022 17:47:08 |        |
| <b>File Name</b>              | C:\DOCS\OUTPUT_301\2022\06.июнь\SZA-BM-2538-4.C_002001r |                             |                      |                              | <b>Frequency (MHz)</b>  | 100.61               |        |
| <b>Nucleus</b>                | 13C                                                     | <b>Number of Transients</b> | 401                  | <b>Original Points Count</b> | 16384                   | <b>Points Count</b>  | 131072 |
| <b>Pulse Sequence</b>         | zgpg30                                                  | <b>Solvent</b>              | CHLOROFORM-D         |                              | <b>Sweep Width (Hz)</b> | 24154.59             |        |
| <b>Temperature (degree C)</b> | 27.000                                                  |                             |                      |                              |                         |                      |        |

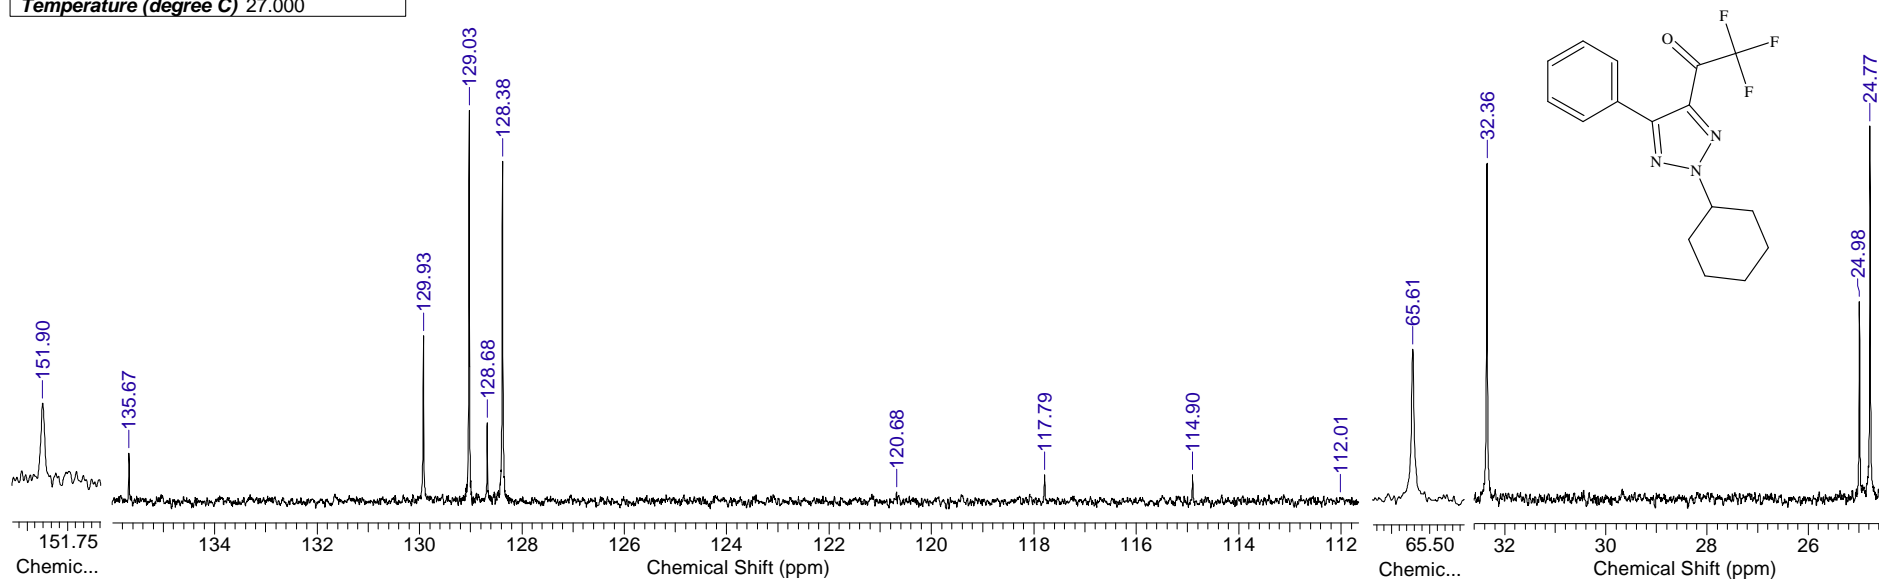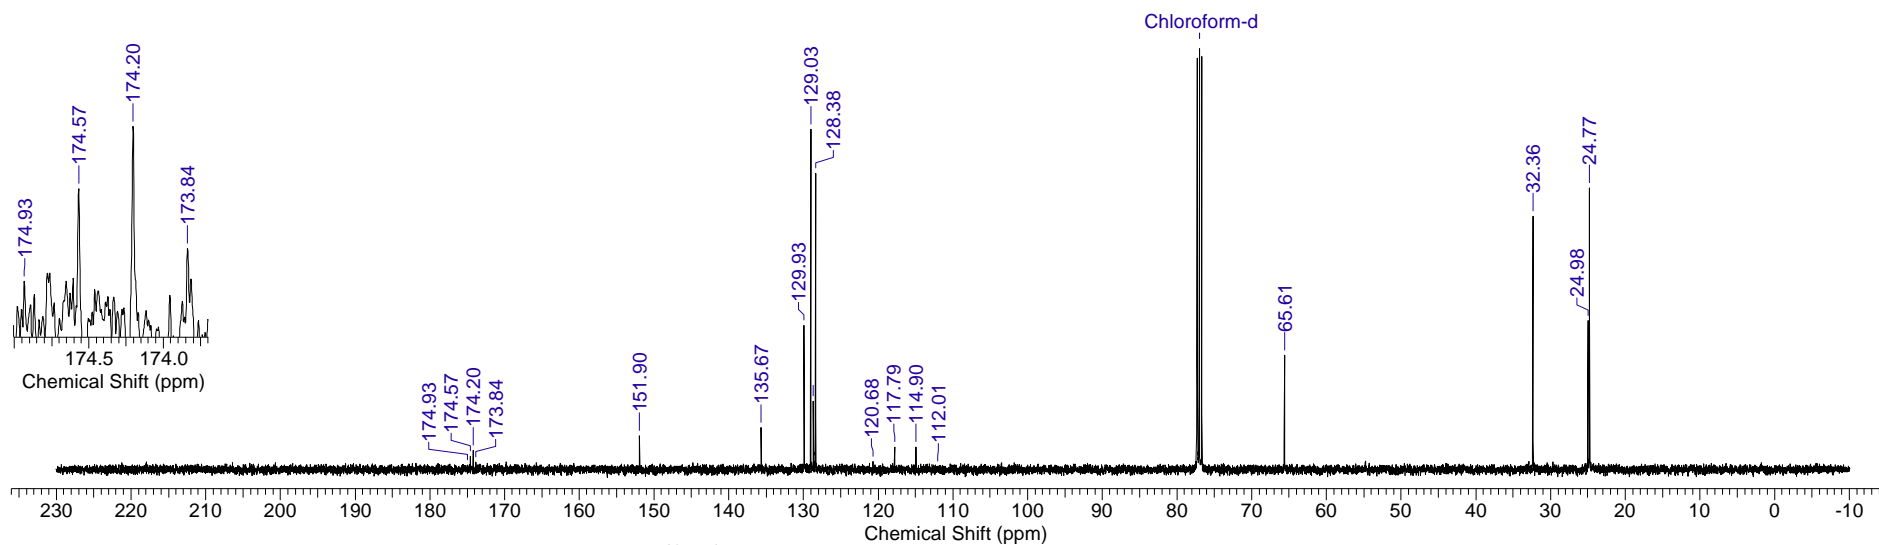<sup>13</sup>C{<sup>1</sup>H} NMR spectrum of **3m** (100.6 MHz, CDCl<sub>3</sub>)

|                               |                                                          |                             |                      |                              |                      |
|-------------------------------|----------------------------------------------------------|-----------------------------|----------------------|------------------------------|----------------------|
| <b>Acquisition Time (sec)</b> | 4.0894                                                   | <b>Comment</b>              | Imported from UXMNR. | <b>Date</b>                  | 28 Jun 2022 14:24:24 |
| <b>File Name</b>              | C:\DOCS\OUTPUT_301\2022\06.июнь\SZA-BM-2538-15.H_001001r |                             |                      | <b>Frequency (MHz)</b>       | 400.13               |
| <b>Nucleus</b>                | <sup>1</sup> H                                           | <b>Number of Transients</b> | 4                    | <b>Original Points Count</b> | 32768                |
| <b>Pulse Sequence</b>         | zg30                                                     | <b>Solvent</b>              | CHLOROFORM-D         | <b>Points Count</b>          | 131072               |
| <b>Temperature (degree C)</b> | 27.000                                                   |                             |                      | <b>Sweep Width (Hz)</b>      | 8012.82              |

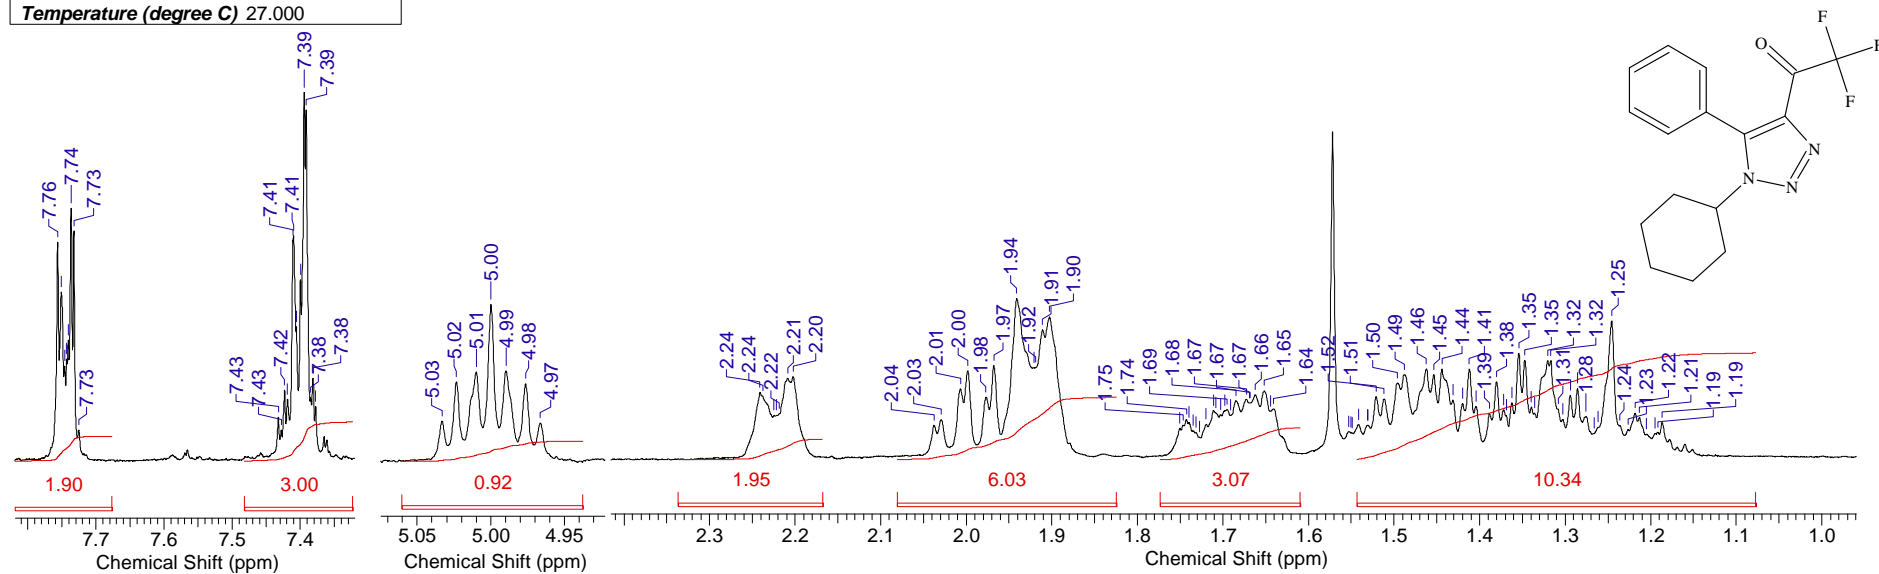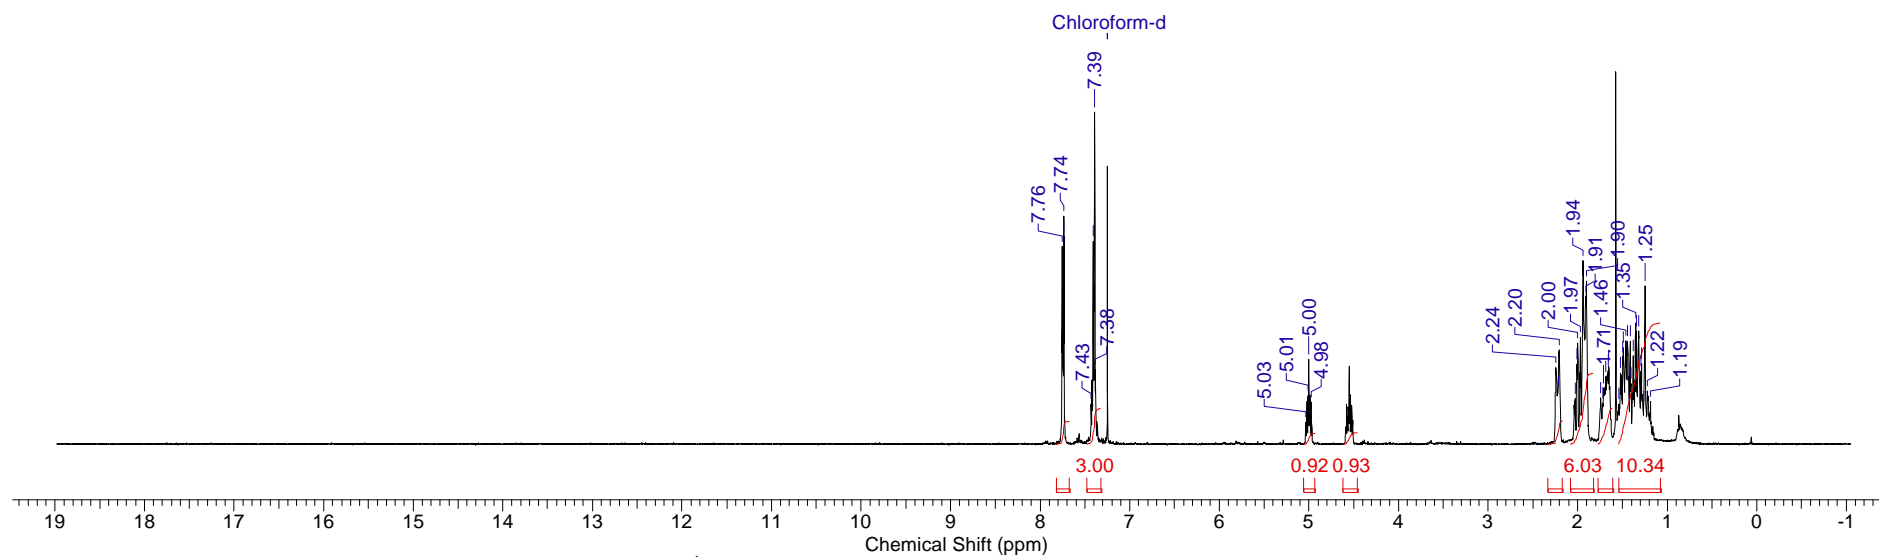

<sup>1</sup>H NMR spectrum of **4m** (400.1 MHz, CDCl<sub>3</sub>)



|                               |                                                          |                             |                      |                              |                         |                      |        |
|-------------------------------|----------------------------------------------------------|-----------------------------|----------------------|------------------------------|-------------------------|----------------------|--------|
| <b>Acquisition Time (sec)</b> | 1.7433                                                   | <b>Comment</b>              | Imported from UXNMR. |                              | <b>Date</b>             | 28 Jun 2022 14:44:30 |        |
| <b>File Name</b>              | C:\DOCS\OUTPUT_301\2022\06.июнь\SZA-BM-2538-15.F_005001r |                             |                      |                              | <b>Frequency (MHz)</b>  | 376.50               |        |
| <b>Nucleus</b>                | 19F                                                      | <b>Number of Transients</b> | 32                   | <b>Original Points Count</b> | 131072                  | <b>Points Count</b>  | 262144 |
| <b>Pulse Sequence</b>         | zgfgqn                                                   | <b>Solvent</b>              | CHLOROFORM-D         |                              | <b>Sweep Width (Hz)</b> | 75187.97             |        |
| <b>Temperature (degree C)</b> | 27.000                                                   |                             |                      |                              |                         |                      |        |

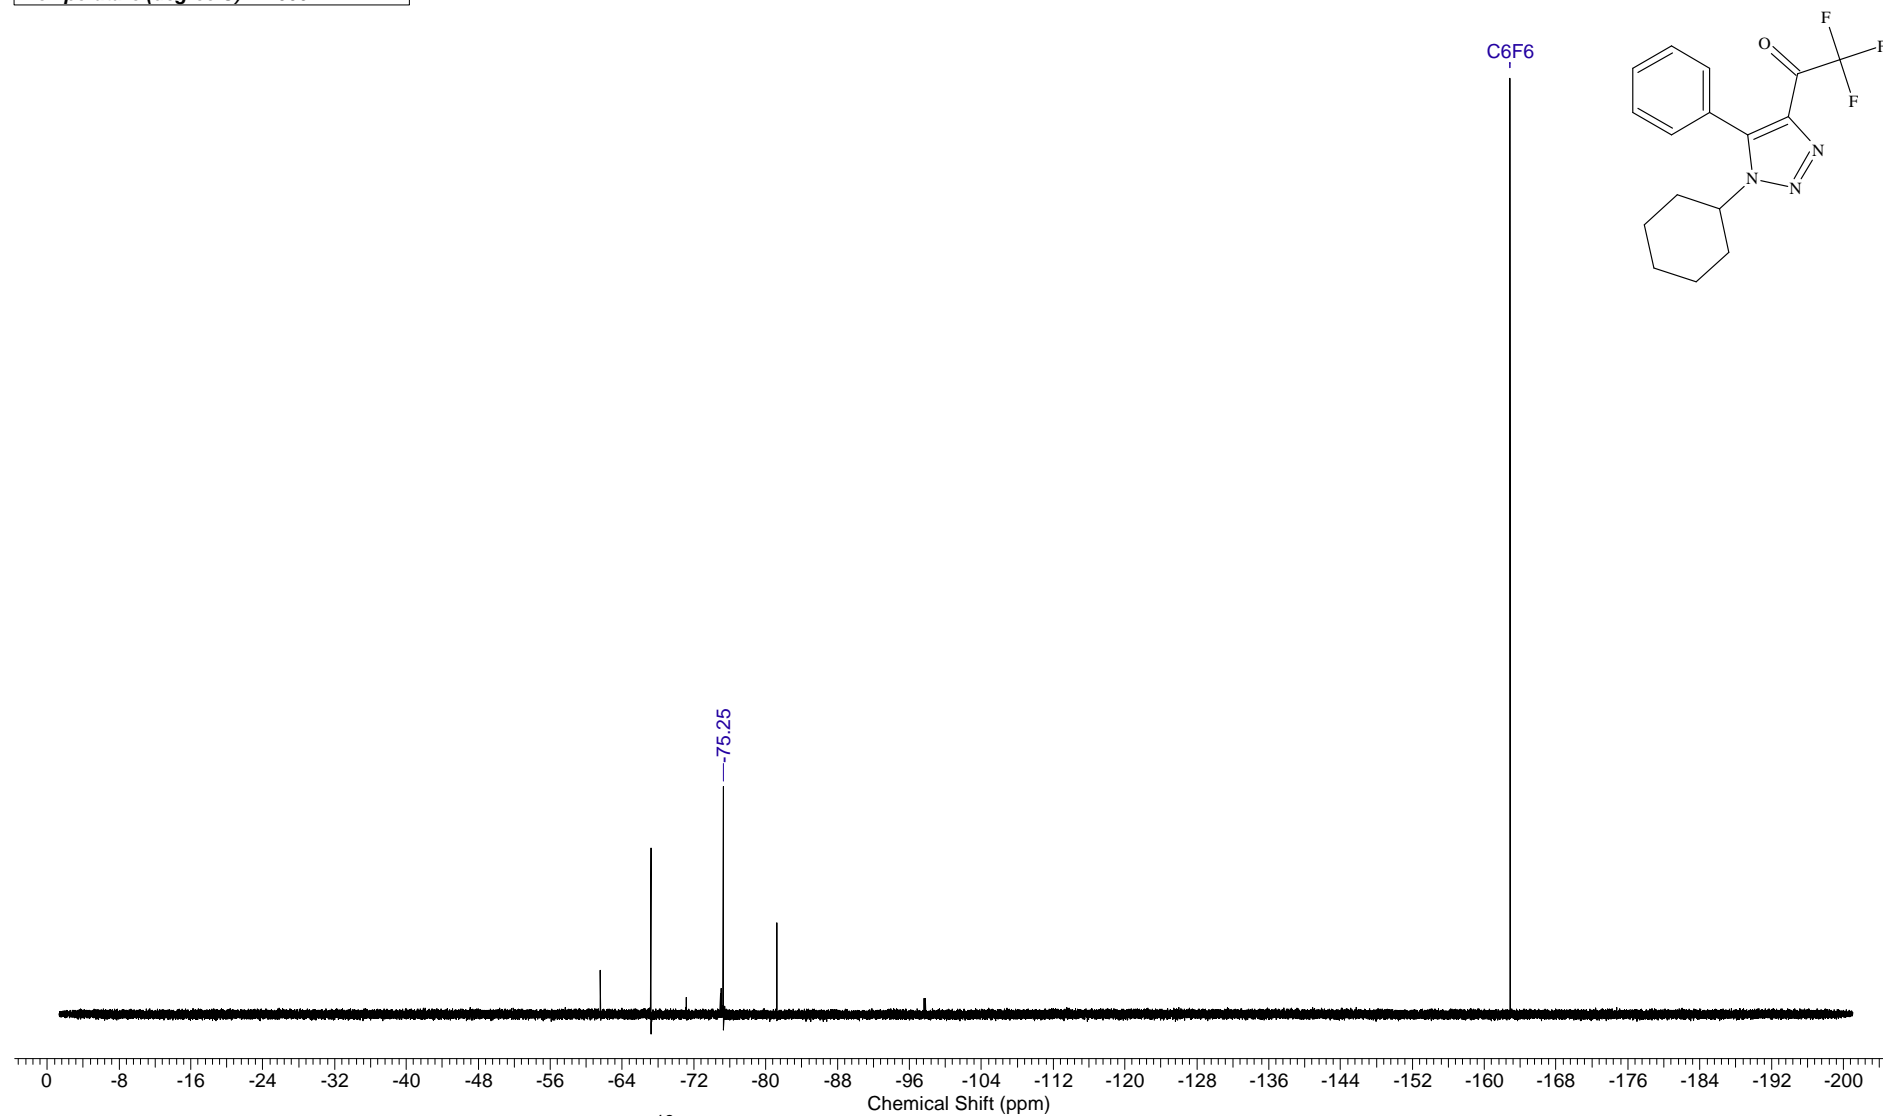

|                        |                                                              |                      |                      |                       |                 |                        |        |
|------------------------|--------------------------------------------------------------|----------------------|----------------------|-----------------------|-----------------|------------------------|--------|
| Acquisition Time (sec) | 4.0894                                                       | Comment              | Imported from UXNMR. |                       | Date            | 26 Apr 2022 14:01:10   |        |
| File Name              | C:\DOCS\OUTPUT_301\2022\04.апрель\SZA-BM-2504-R-18.H_001001r |                      |                      |                       | Frequency (MHz) | 400.13                 |        |
| Nucleus                | 1H                                                           | Number of Transients | 7                    | Original Points Count | 32768           | Points Count           | 131072 |
| Pulse Sequence         | zg30                                                         | Solvent              | BENZENE-D6           | Sweep Width (Hz)      | 8012.82         | Temperature (degree C) | 27.000 |

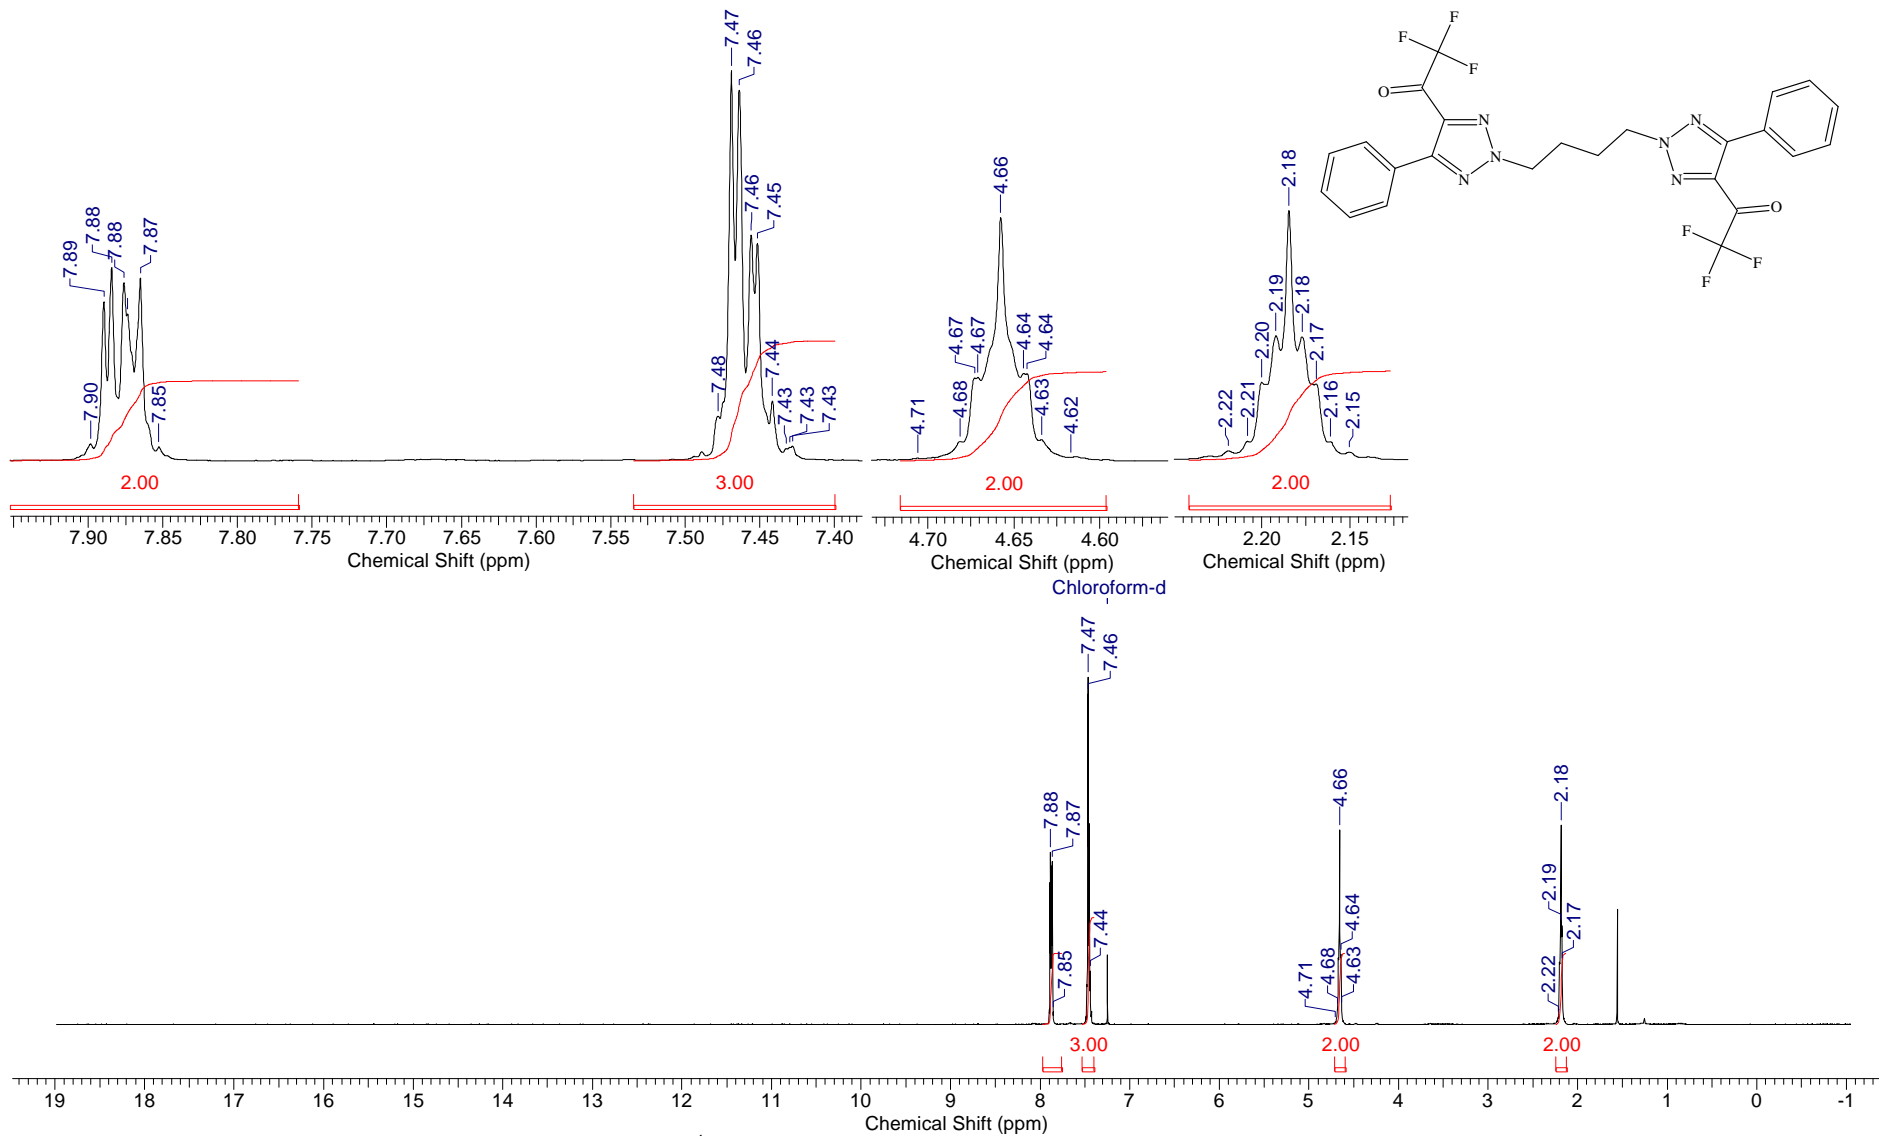

|                               |                                                             |                             |                      |                              |                      |
|-------------------------------|-------------------------------------------------------------|-----------------------------|----------------------|------------------------------|----------------------|
| <b>Acquisition Time (sec)</b> | 1.7433                                                      | <b>Comment</b>              | Imported from UXNMR. | <b>Date</b>                  | 26 Apr 2022 13:58:04 |
| <b>File Name</b>              | C:\DOCS\OUTPUT_301\2022\04.апрель\SA-BM-2504-R-18.F_005001r | <b>Frequency (MHz)</b>      | 376.50               | <b>Points Count</b>          | 262144               |
| <b>Nucleus</b>                | <sup>19</sup> F                                             | <b>Number of Transients</b> | 16                   | <b>Original Points Count</b> | 131072               |
| <b>Pulse Sequence</b>         | zgfgqn                                                      | <b>Solvent</b>              | CHLOROFORM-D         | <b>Sweep Width (Hz)</b>      | 75187.97             |
| <b>Temperature (degree C)</b> | 27.000                                                      |                             |                      |                              |                      |

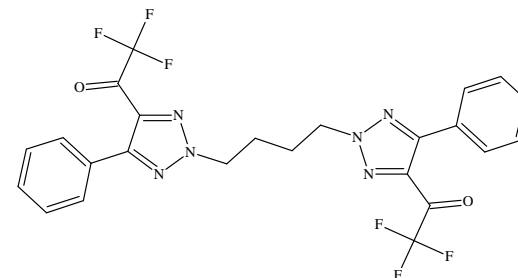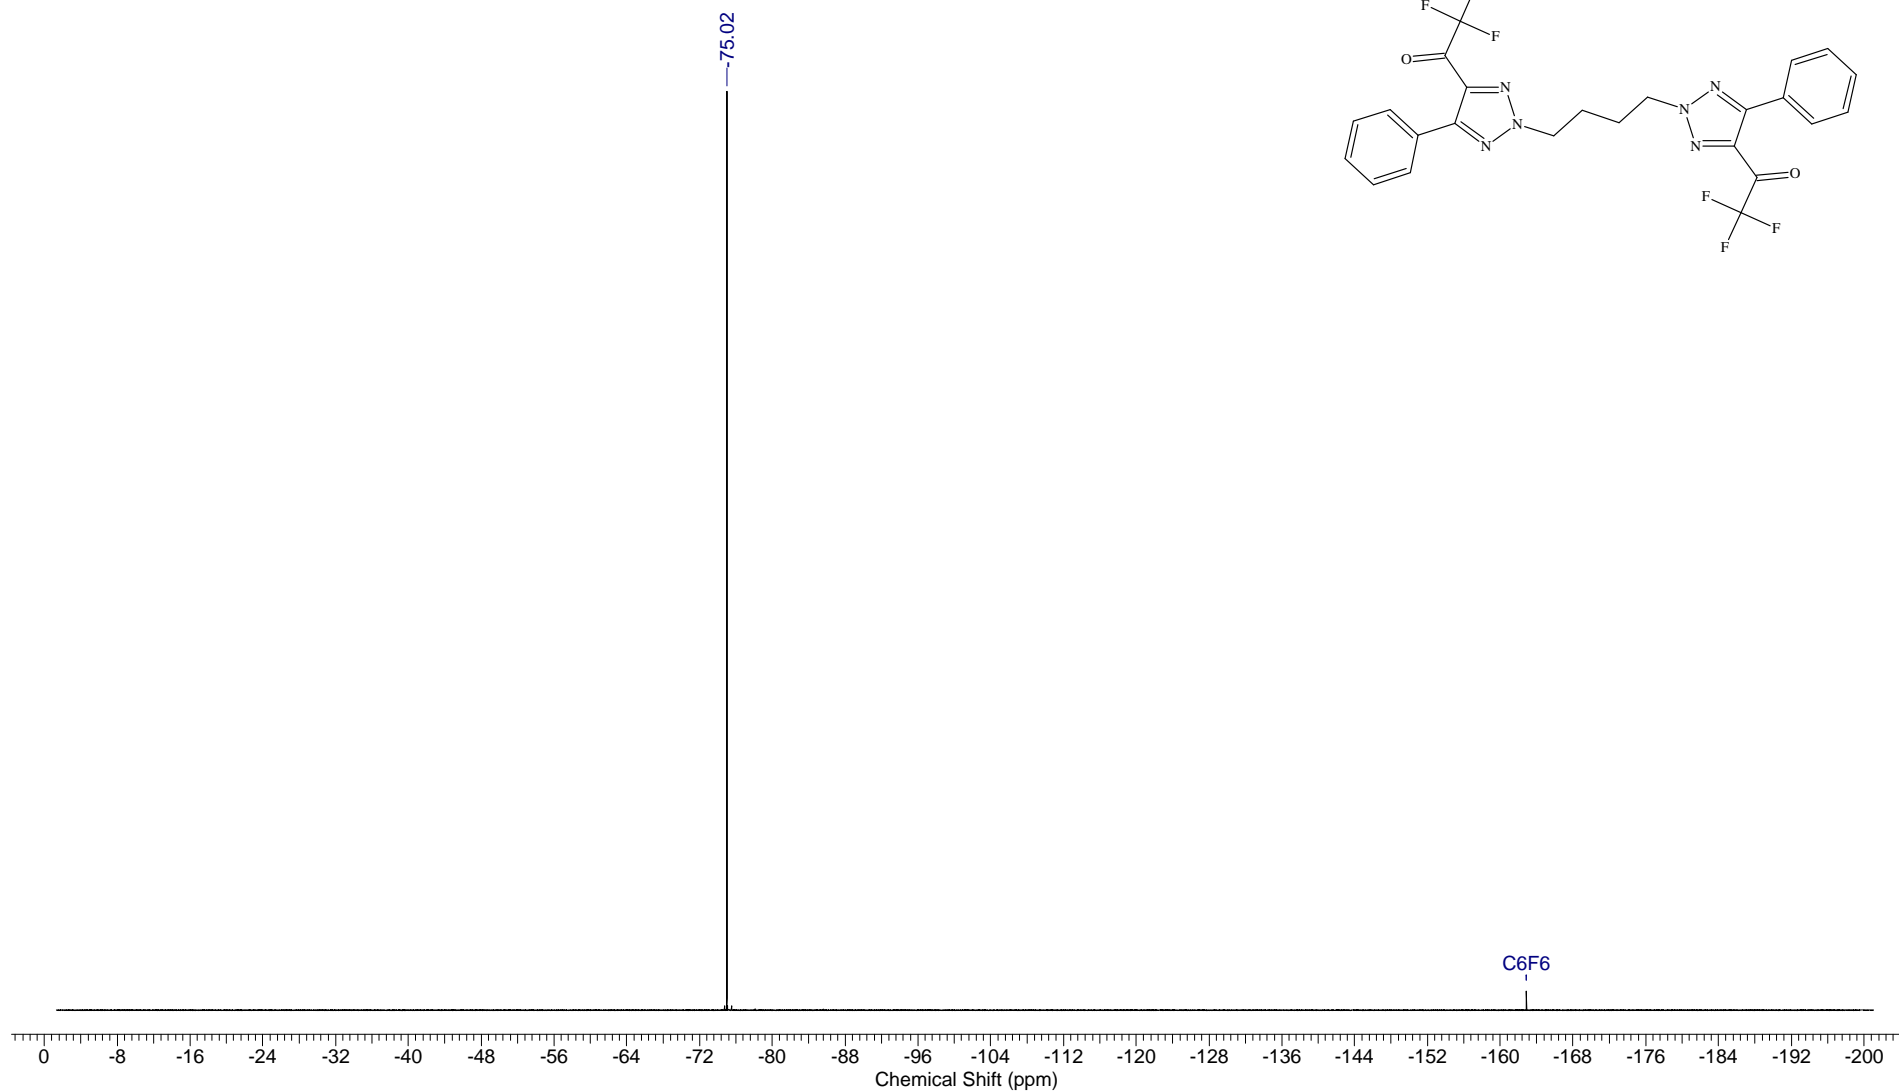

|                        |                                                              |                      |                      |                       |                  |                      |        |
|------------------------|--------------------------------------------------------------|----------------------|----------------------|-----------------------|------------------|----------------------|--------|
| Acquisition Time (sec) | 0.6783                                                       | Comment              | Imported from UXNMR. |                       | Date             | 26 Apr 2022 14:26:04 |        |
| File Name              | C:\DOCS\OUTPUT_301\2022\04.апрель\SZA-BM-2504-R-18.C_002001r |                      |                      |                       | Frequency (MHz)  | 100.61               |        |
| Nucleus                | 13C                                                          | Number of Transients | 546                  | Original Points Count | 16384            | Points Count         | 131072 |
| Pulse Sequence         | zgpg30                                                       | Solvent              | CHLOROFORM-D         |                       | Sweep Width (Hz) | 24154.59             |        |
| Temperature (degree C) | 27.000                                                       |                      |                      |                       |                  |                      |        |

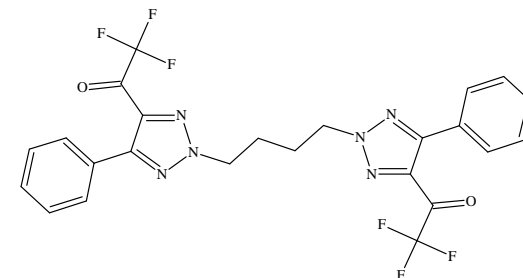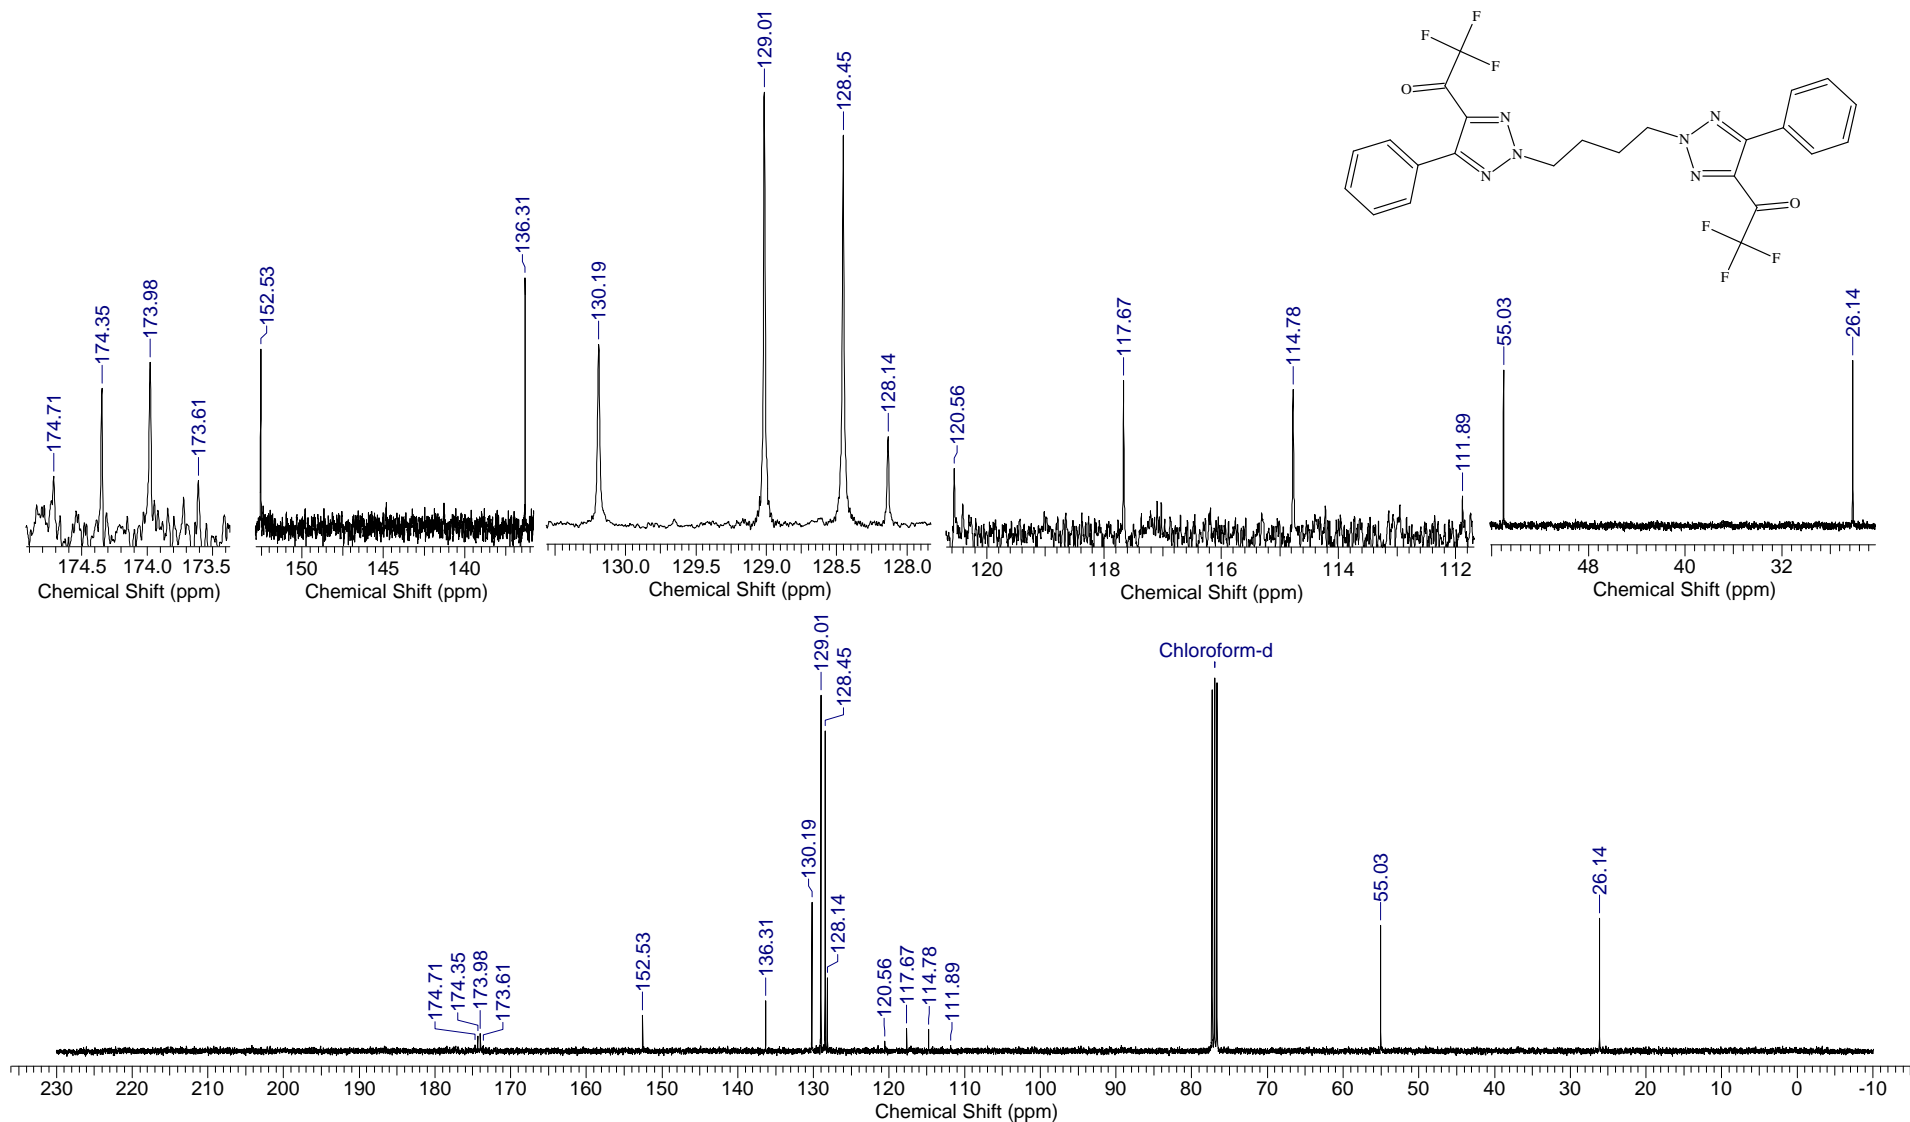

<sup>13</sup>C{<sup>1</sup>H} NMR spectrum of **3n** (100.6 MHz, CDCl<sub>3</sub>)

|                        |                                                           |                      |                      |                       |                  |                      |        |
|------------------------|-----------------------------------------------------------|----------------------|----------------------|-----------------------|------------------|----------------------|--------|
| Acquisition Time (sec) | 4.0894                                                    | Comment              | Imported from UXNMR. |                       | Date             | 28 Apr 2022 11:23:52 |        |
| File Name              | C:\DOCS\OUTPUT_301\2022\04.апрель\SA-BM-2504-25.H_001001r |                      |                      |                       | Frequency (MHz)  | 400.13               |        |
| Nucleus                | 1H                                                        | Number of Transients | 8                    | Original Points Count | 32768            | Points Count         | 131072 |
| Pulse Sequence         | zg30                                                      | Solvent              | CHLOROFORM-D         |                       | Sweep Width (Hz) | 8012.82              |        |
| Temperature (degree C) | 27.000                                                    |                      |                      |                       |                  |                      |        |

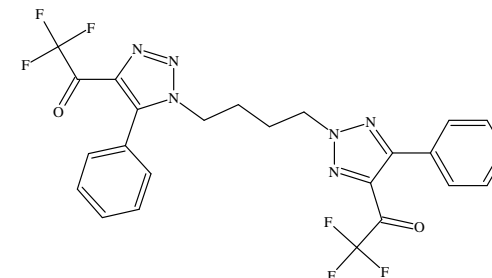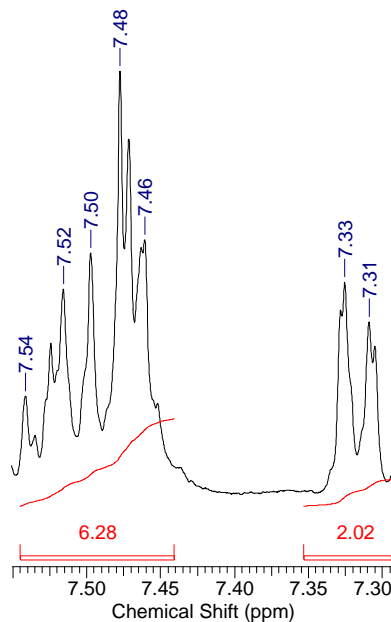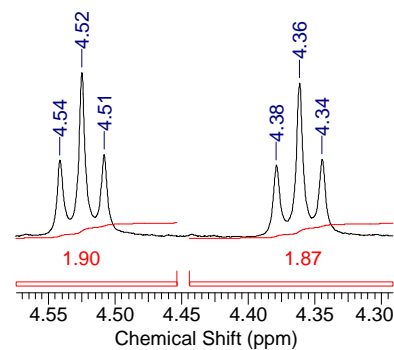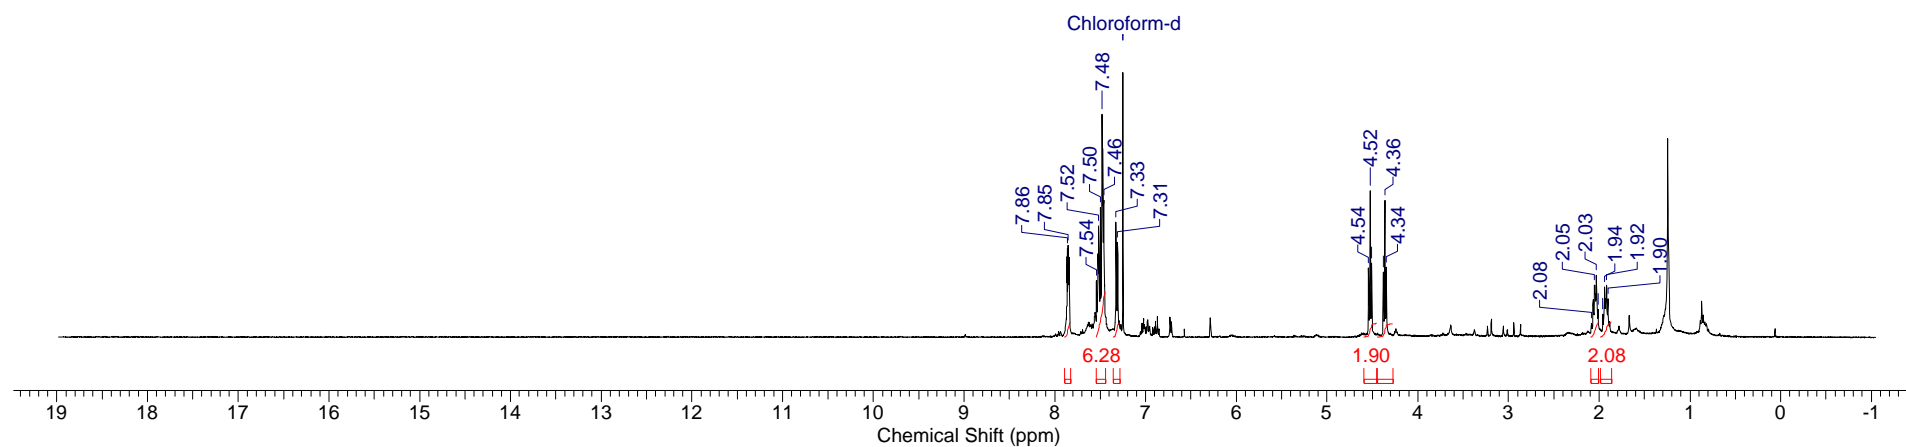

<sup>1</sup>H NMR spectrum of **4n** (400.1 MHz, CDCl<sub>3</sub>)

|                        |                                                           |                      |                      |                       |                  |                      |        |
|------------------------|-----------------------------------------------------------|----------------------|----------------------|-----------------------|------------------|----------------------|--------|
| Acquisition Time (sec) | 1.7433                                                    | Comment              | Imported from UXNMR. |                       | Date             | 28 Apr 2022 12:03:50 |        |
| File Name              | C:\DOCS\OUTPUT_301\2022\04.апрель\SA-BM-2504-25.F_005001r |                      |                      |                       | Frequency (MHz)  | 376.50               |        |
| Nucleus                | 19F                                                       | Number of Transients | 16                   | Original Points Count | 131072           | Points Count         | 262144 |
| Pulse Sequence         | zgfgqn                                                    | Solvent              | CHLOROFORM-D         |                       | Sweep Width (Hz) | 75187.97             |        |
| Temperature (degree C) | 27.000                                                    |                      |                      |                       |                  |                      |        |

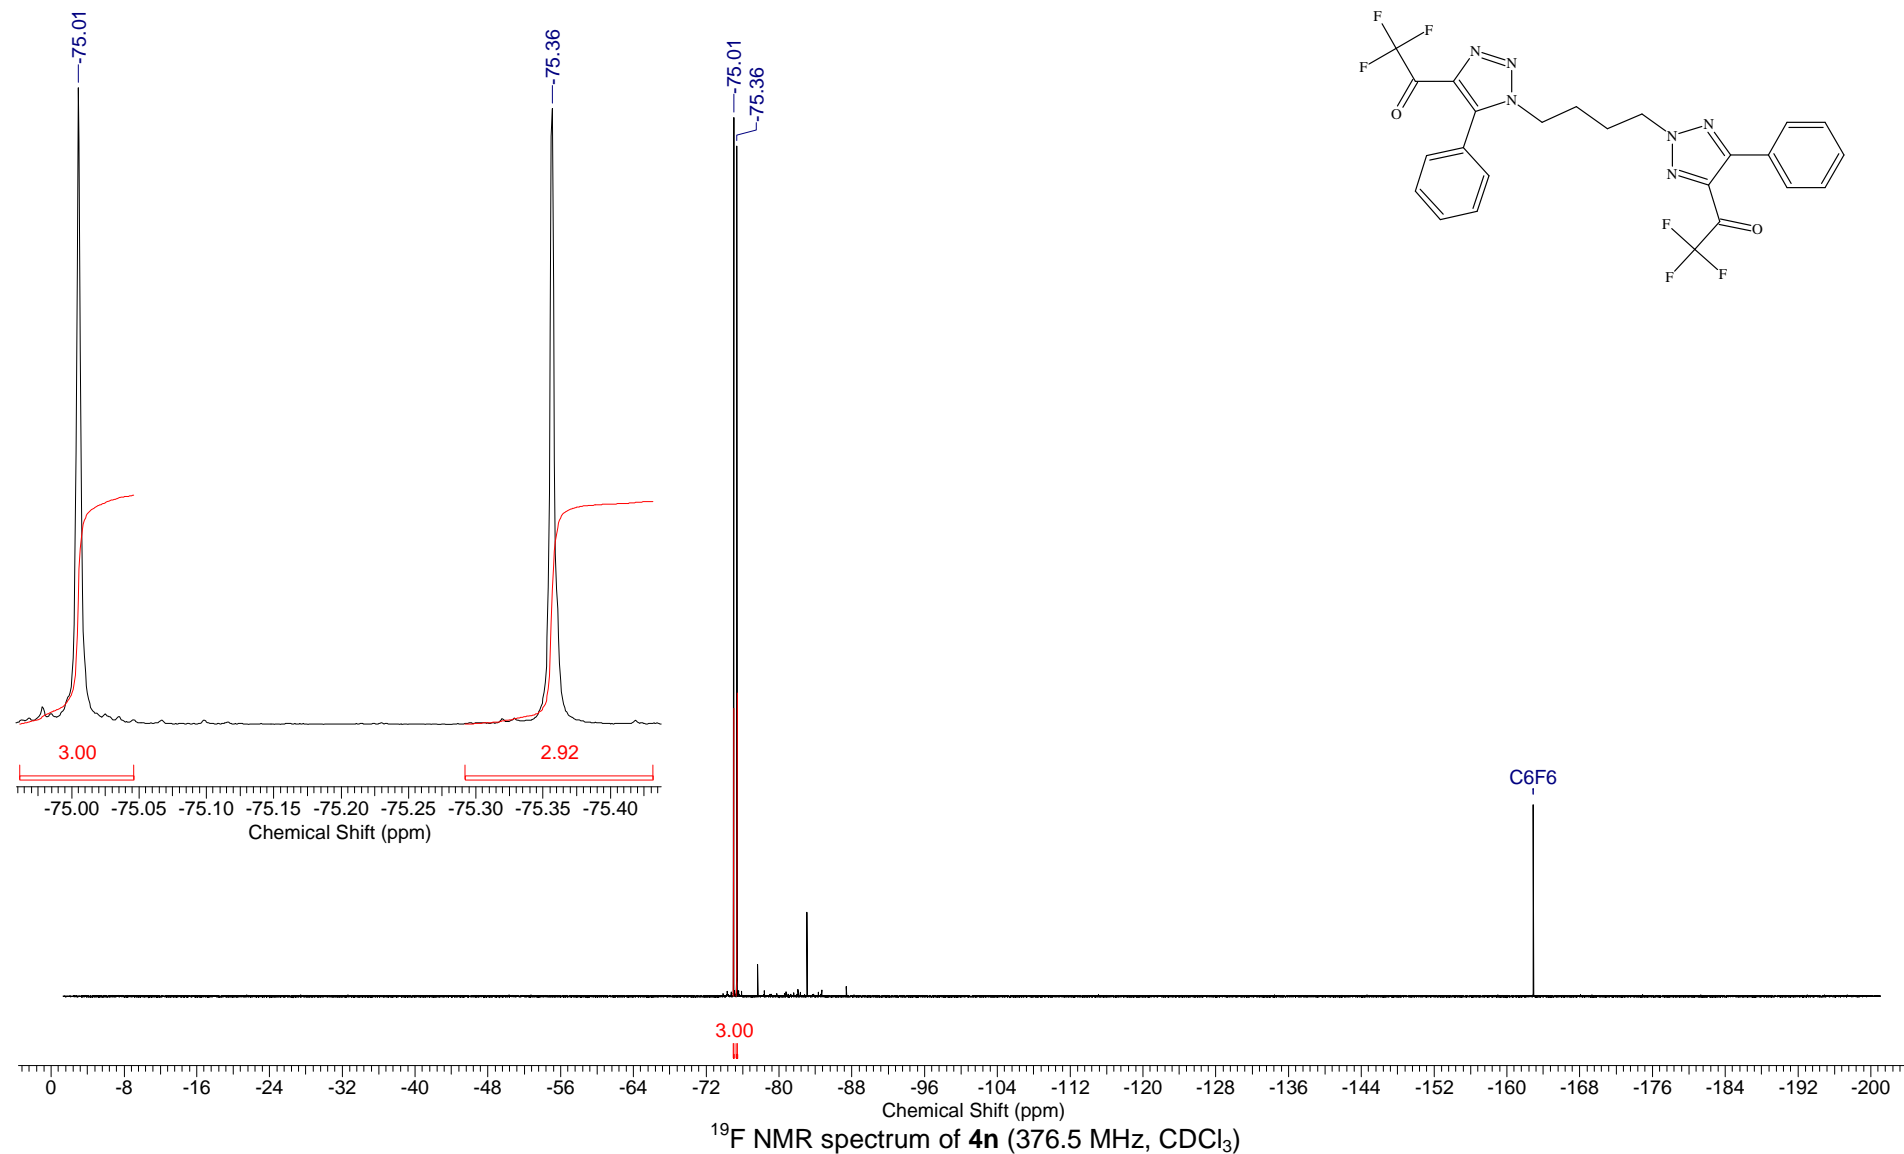

|                        |                                                                          |                              |              |                       |                 |                        |        |
|------------------------|--------------------------------------------------------------------------|------------------------------|--------------|-----------------------|-----------------|------------------------|--------|
| Acquisition Time (sec) | 0.6783                                                                   | Comment Imported from UXMNR. |              |                       | Date            | 29 Apr 2022 12:48:00   |        |
| File Name              | C:\DOCS\OUTPUT_301\2022\05.май\SA-BM-2504-25.C\SA-BM-2504-25.C_002000fid |                              |              |                       | Frequency (MHz) | 100.62                 |        |
| Nucleus                | 13C                                                                      | Number of Transients         | 3207         | Original Points Count | 16384           | Points Count           | 16384  |
| Pulse Sequence         | zpgq30                                                                   | Solvent                      | CHLOROFORM-D | Sweep Width (Hz)      | 24154.59        | Temperature (degree C) | 27.000 |

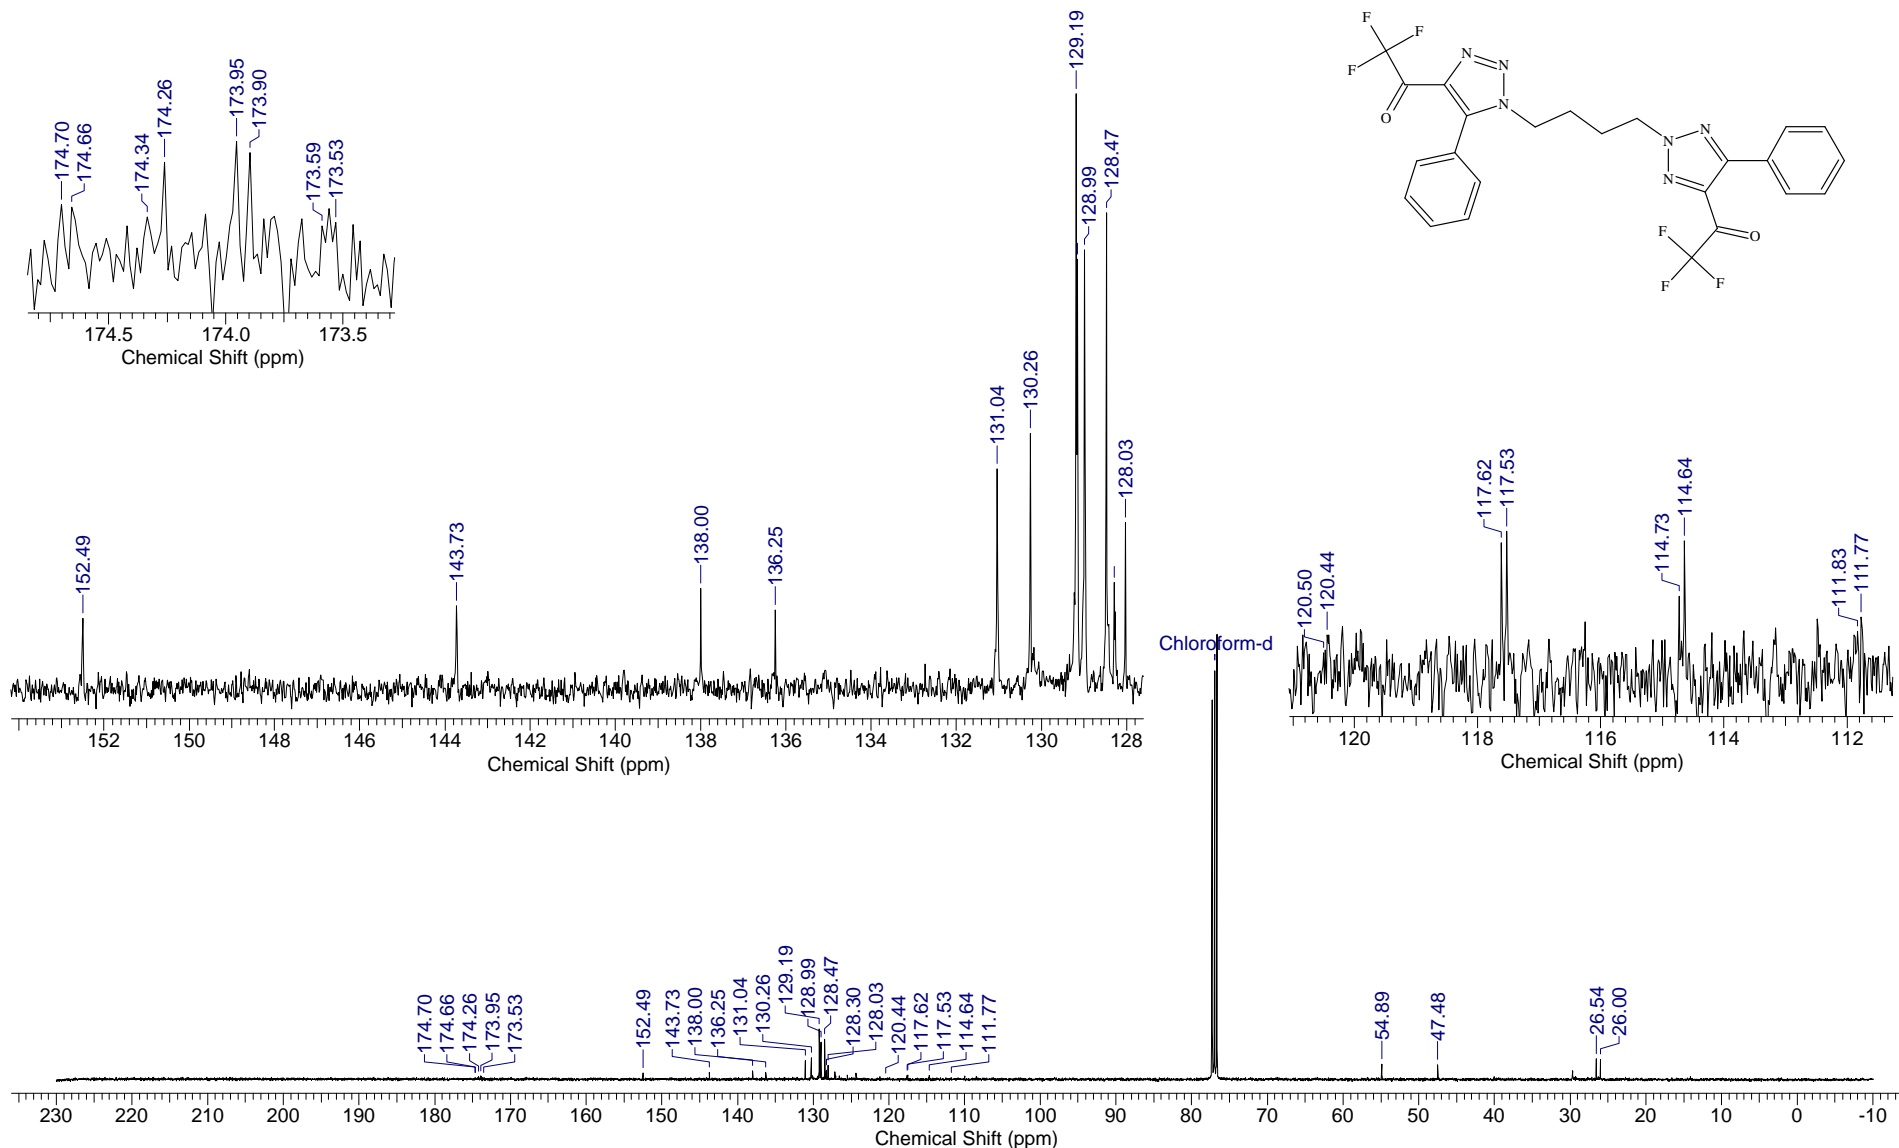<sup>13</sup>C{<sup>1</sup>H} NMR spectrum of **4n** (100.6 MHz, CDCl<sub>3</sub>)

|                               |                                                      |                             |                      |                              |                      |
|-------------------------------|------------------------------------------------------|-----------------------------|----------------------|------------------------------|----------------------|
| <b>Acquisition Time (sec)</b> | 4.0894                                               | <b>Comment</b>              | Imported from UXNMR. | <b>Date</b>                  | 19 Mar 2022 23:08:00 |
| <b>File Name</b>              | C:\DOCS\BM\MP_COCEДИ\2022\bm220319\BM-2459-R_001001r | <b>Frequency (MHz)</b>      | 400.13               | <b>Points Count</b>          | 131072               |
| <b>Nucleus</b>                | <sup>1</sup> H                                       | <b>Number of Transients</b> | 8                    | <b>Original Points Count</b> | 32768                |
| <b>Pulse Sequence</b>         | zg30                                                 | <b>Solvent</b>              | CHLOROFORM-D         | <b>Sweep Width (Hz)</b>      | 8012.82              |
| <b>Temperature (degree C)</b> | 27.000                                               |                             |                      |                              |                      |

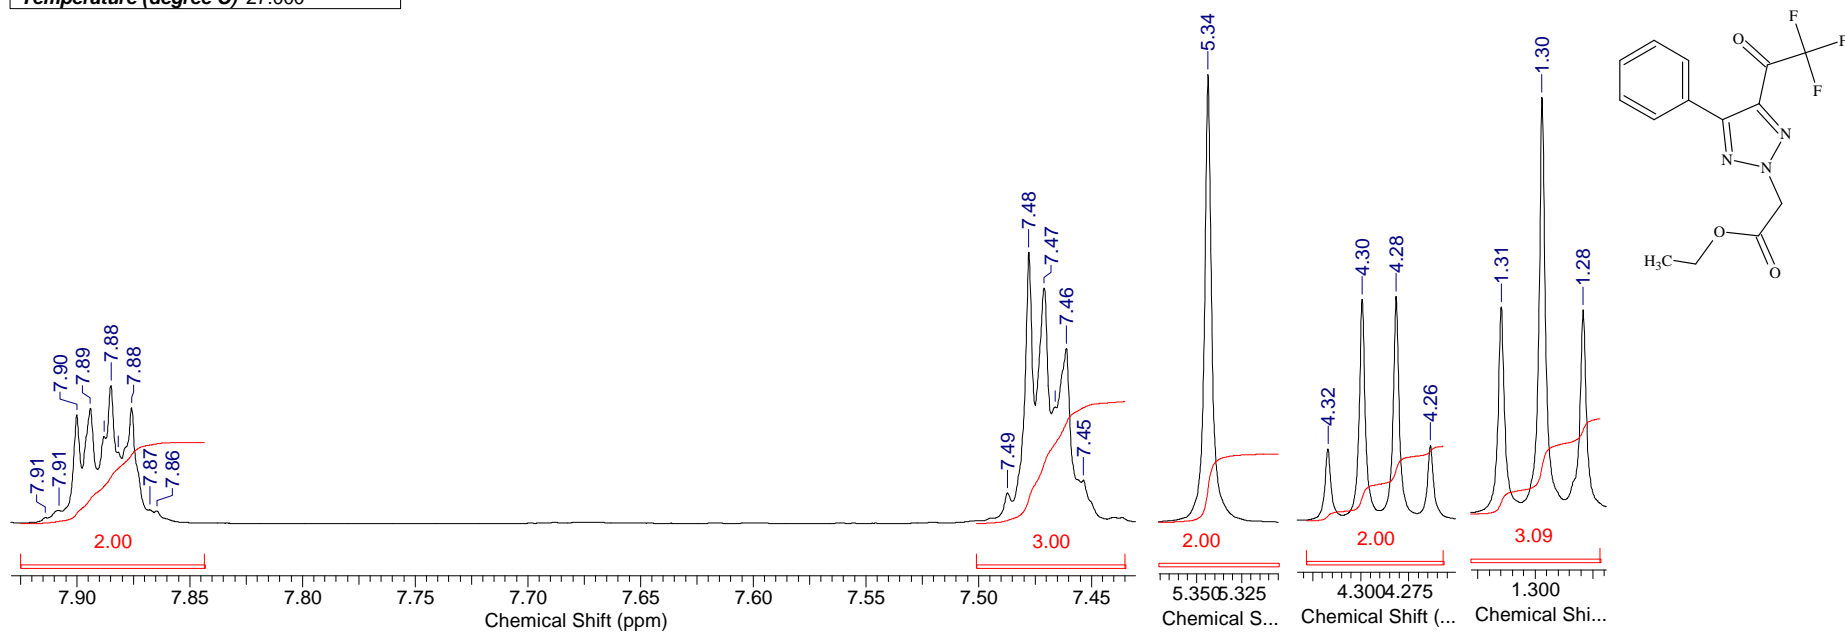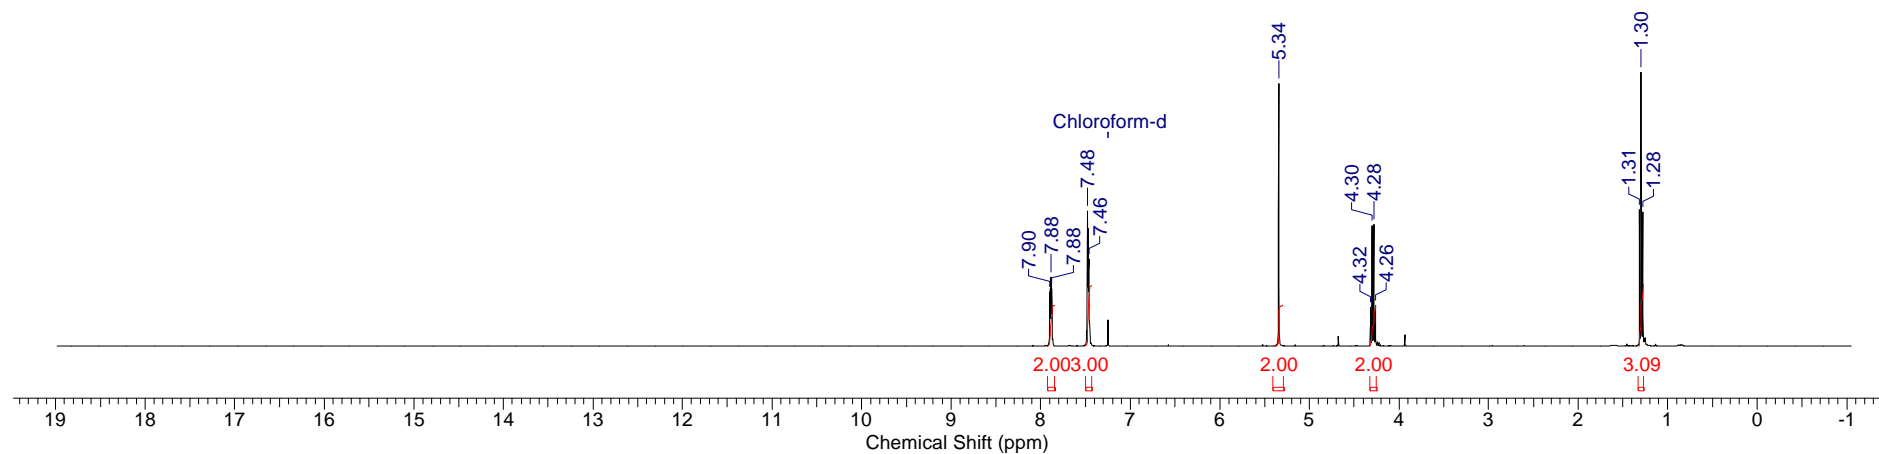<sup>1</sup>H NMR spectrum of **3o** (400.1 MHz, CDCl<sub>3</sub>)



|                               |                                                            |                             |                      |                              |                      |
|-------------------------------|------------------------------------------------------------|-----------------------------|----------------------|------------------------------|----------------------|
| <b>Acquisition Time (sec)</b> | 1.7433                                                     | <b>Comment</b>              | Imported from UXNMR. | <b>Date</b>                  | 19 Mar 2022 23:11:04 |
| <b>File Name</b>              | C:\BM_DATA\DOCS\JMP_соседи\2022\bm220319\BM-2459-R_005001r |                             |                      | <b>Frequency (MHz)</b>       | 376.50               |
| <b>Nucleus</b>                | <sup>19</sup> F                                            | <b>Number of Transients</b> | 16                   | <b>Original Points Count</b> | 131072               |
| <b>Pulse Sequence</b>         | zgfgqn                                                     | <b>Solvent</b>              | CHLOROFORM-D         | <b>Points Count</b>          | 262144               |
| <b>Temperature (degree C)</b> | 27.000                                                     |                             |                      | <b>Sweep Width (Hz)</b>      | 75187.97             |

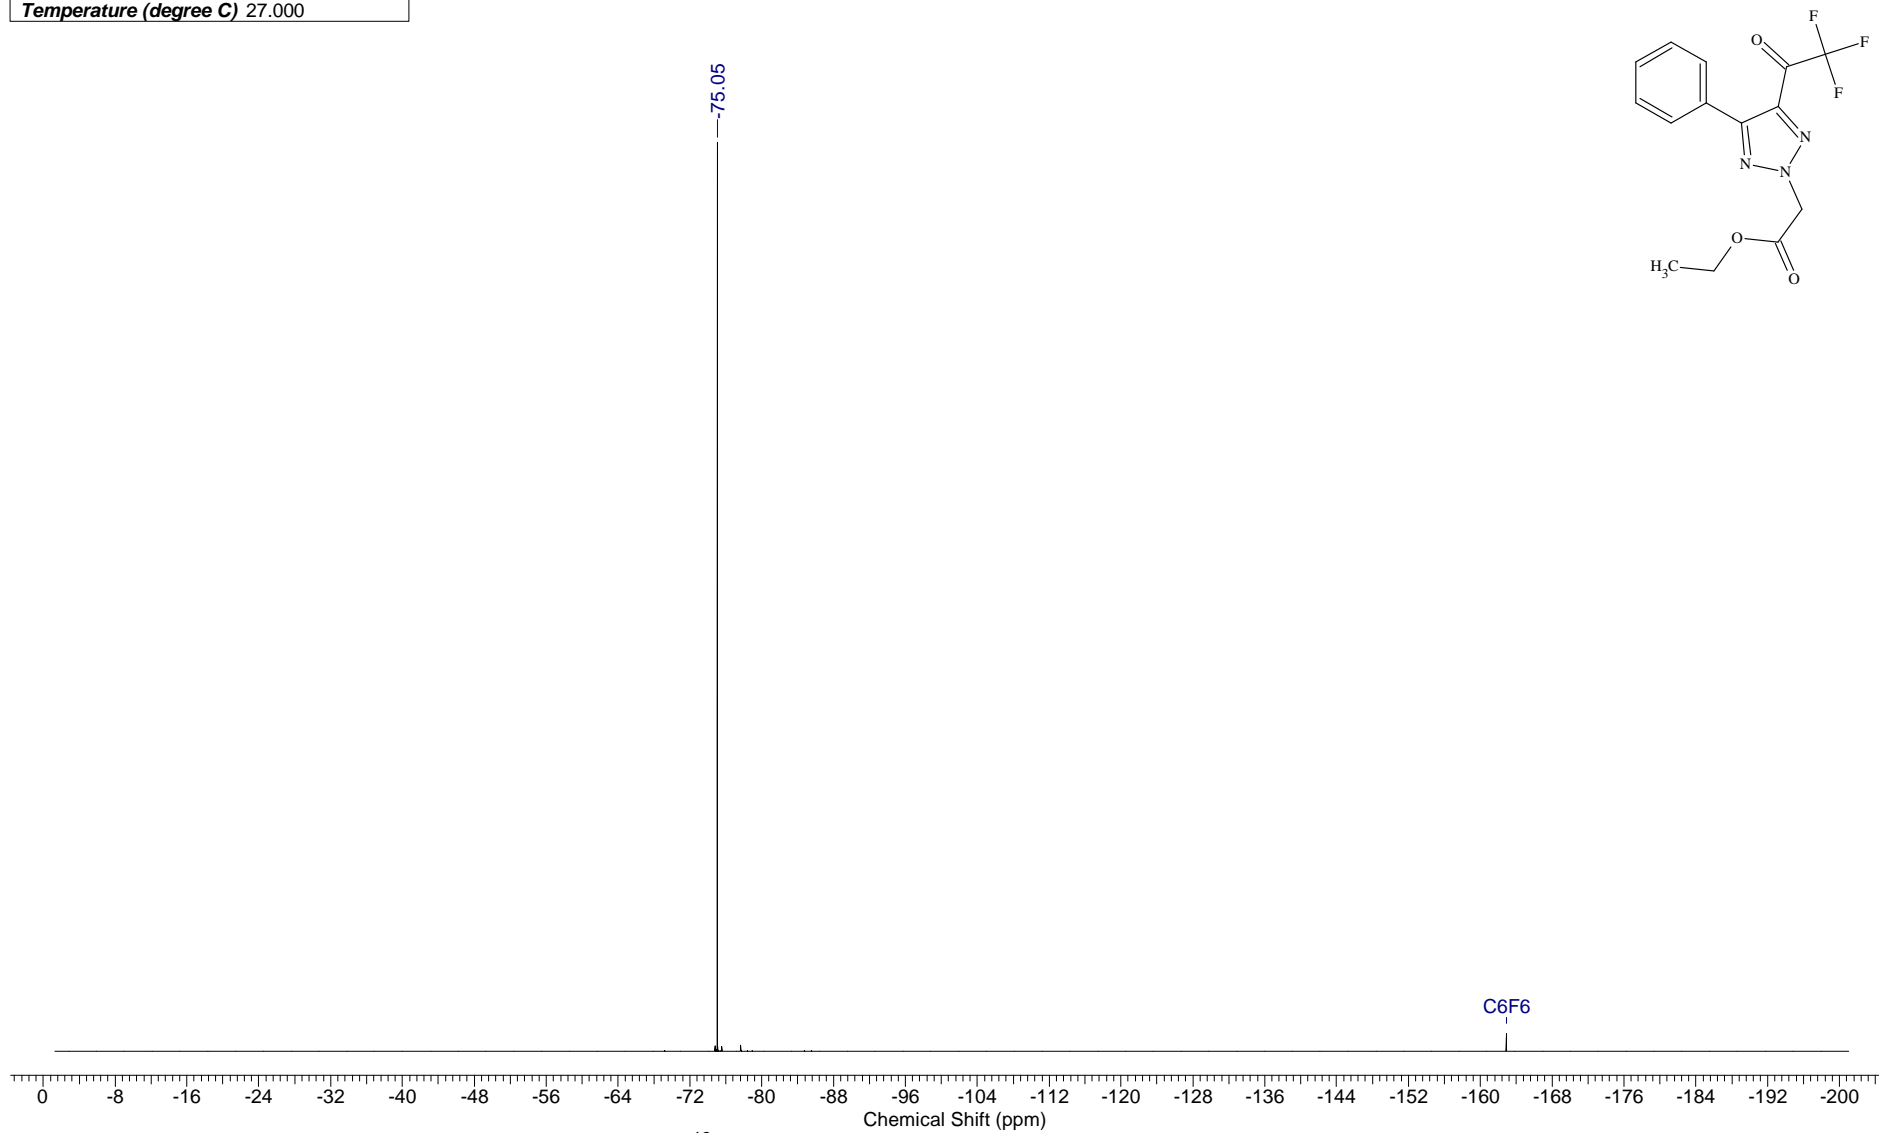

|                        |                                                    |                      |                      |                       |          |                        |                      |
|------------------------|----------------------------------------------------|----------------------|----------------------|-----------------------|----------|------------------------|----------------------|
| Acquisition Time (sec) | 0.6783                                             | Comment              | Imported from UXNMR. |                       |          | Date                   | 21 Mar 2022 15:51:54 |
| File Name              | C:\DOCS\OUTPUT_301\2022\03.mpr\BM-2459-R.C_002001r |                      |                      |                       |          | Frequency (MHz)        | 100.61               |
| Nucleus                | 13C                                                | Number of Transients | 257                  | Original Points Count | 16384    | Points Count           | 131072               |
| Pulse Sequence         | zgpg30                                             | Solvent              | DMSO-D6              | Sweep Width (Hz)      | 24154.59 | Temperature (degree C) | 27.000               |

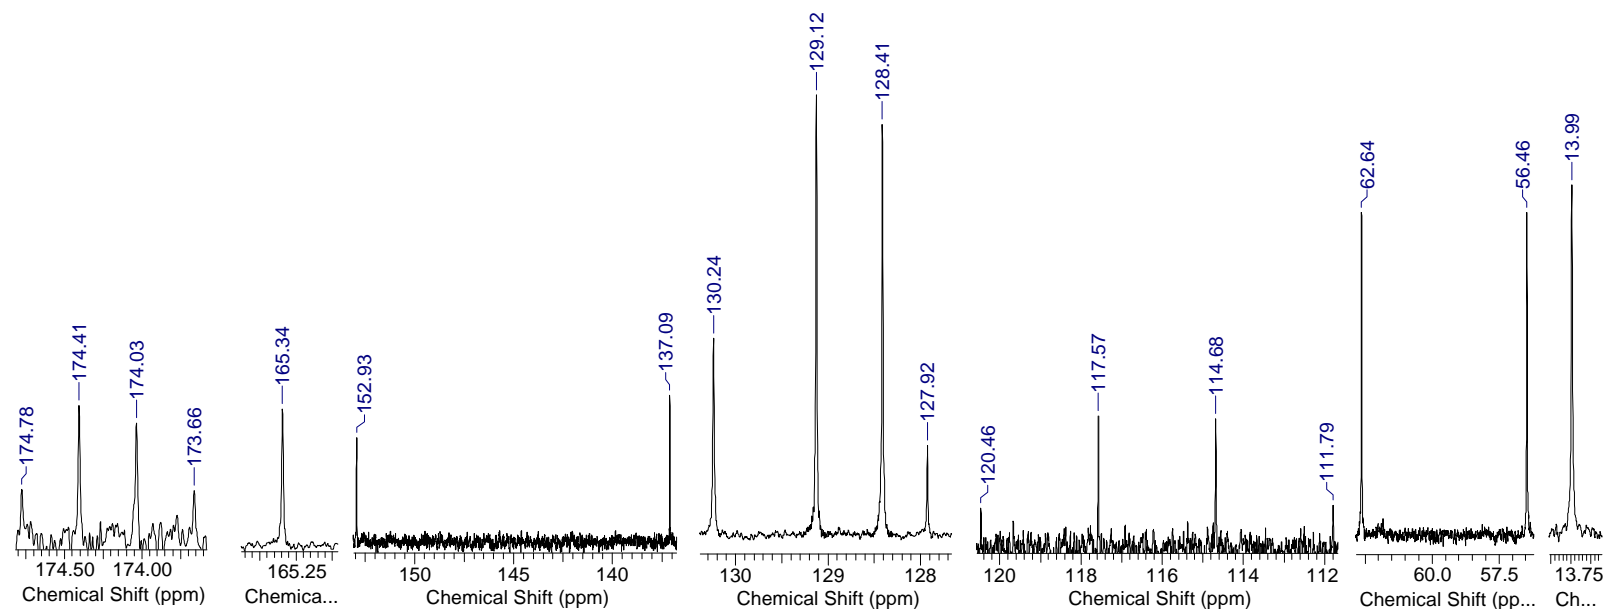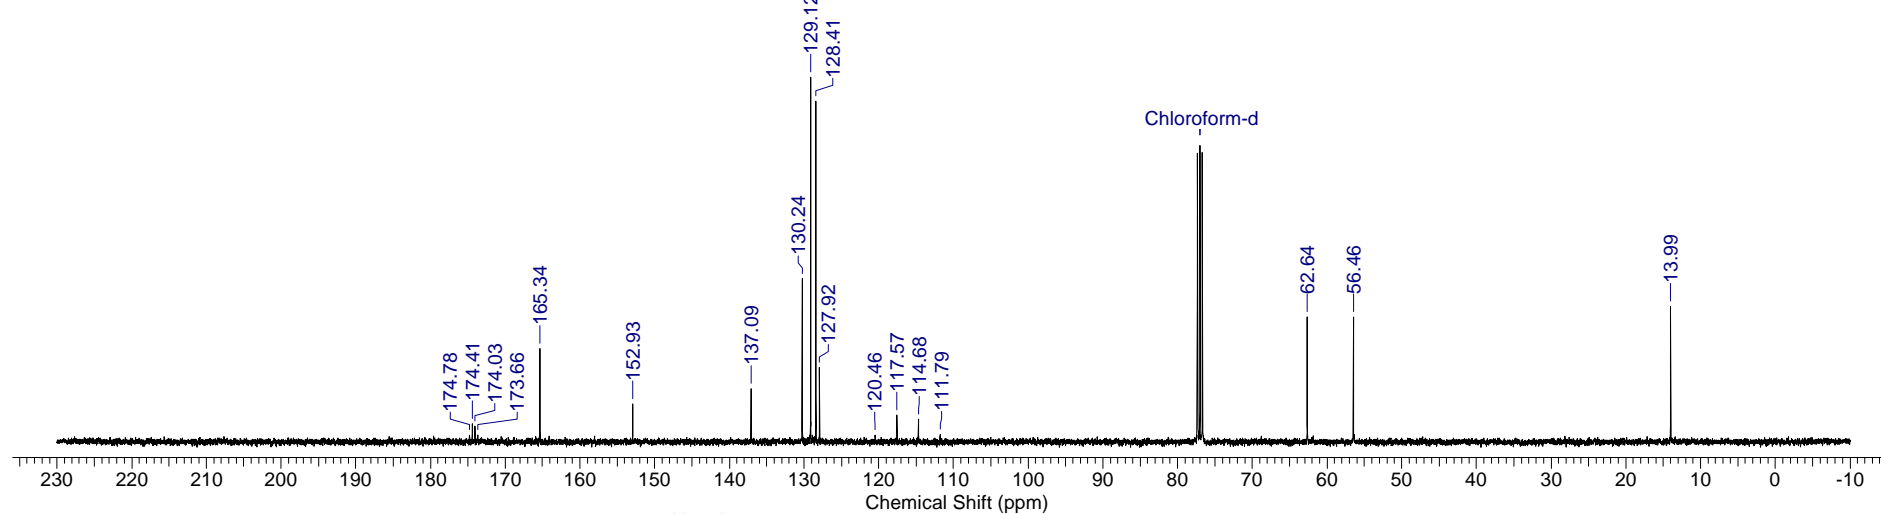<sup>13</sup>C{<sup>1</sup>H} NMR spectrum of **3o** (100.6 MHz, CDCl<sub>3</sub>)

|                               |                                                       |                             |                      |                              |                      |
|-------------------------------|-------------------------------------------------------|-----------------------------|----------------------|------------------------------|----------------------|
| <b>Acquisition Time (sec)</b> | 4.0894                                                | <b>Comment</b>              | Imported from UXNMR. | <b>Date</b>                  | 17 Mar 2022 22:53:52 |
| <b>File Name</b>              | C:\DOCS\BM\MP_COSEДИ\2022\BM-2459-R\BM-2459-R_001001r |                             |                      | <b>Frequency (MHz)</b>       | 400.13               |
| <b>Nucleus</b>                | <sup>1</sup> H                                        | <b>Number of Transients</b> | 8                    | <b>Original Points Count</b> | 32768                |
| <b>Pulse Sequence</b>         | zg30                                                  | <b>Solvent</b>              | CHLOROFORM-D         | <b>Points Count</b>          | 131072               |
| <b>Temperature (degree C)</b> | 27.000                                                |                             |                      | <b>Sweep Width (Hz)</b>      | 8012.82              |

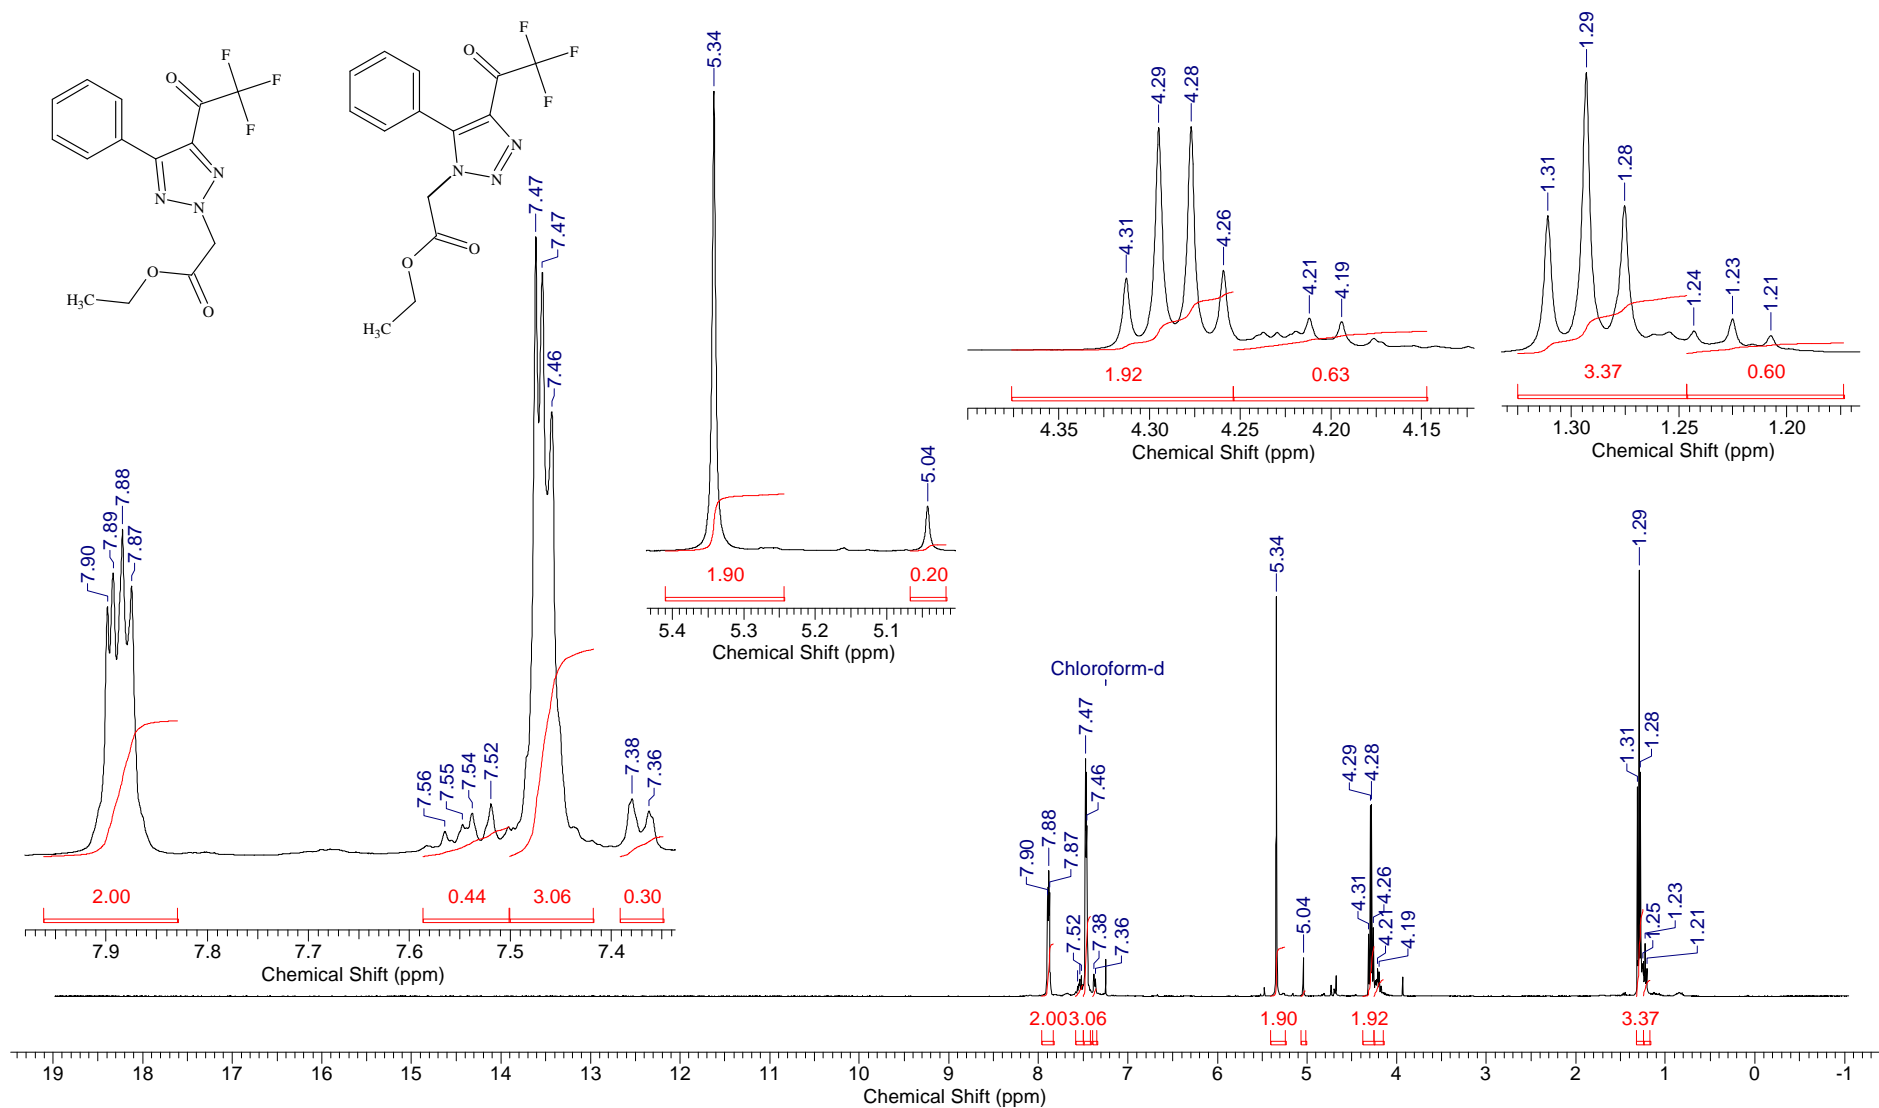<sup>1</sup>H NMR spectrum of mixture of **3o** and **4o** (400.1 MHz, CDCl<sub>3</sub>)

|                        |                                                      |                              |              |                       |                  |                      |        |
|------------------------|------------------------------------------------------|------------------------------|--------------|-----------------------|------------------|----------------------|--------|
| Acquisition Time (sec) | 1.7433                                               | Comment Imported from UXNMR. |              |                       | Date             | 23 Mar 2022 17:55:00 |        |
| File Name              | C:\DOCS\OUTPUT_301\2022\03.mapr\SA-BM-2454.F_005001r |                              |              |                       | Frequency (MHz)  | 376.50               |        |
| Nucleus                | 19F                                                  | Number of Transients         | 16           | Original Points Count | 131072           | Points Count         | 262144 |
| Pulse Sequence         | zgfgqn                                               | Solvent                      | CHLOROFORM-D |                       | Sweep Width (Hz) | 75187.97             |        |
| Temperature (degree C) | 27.000                                               |                              |              |                       |                  |                      | F      |

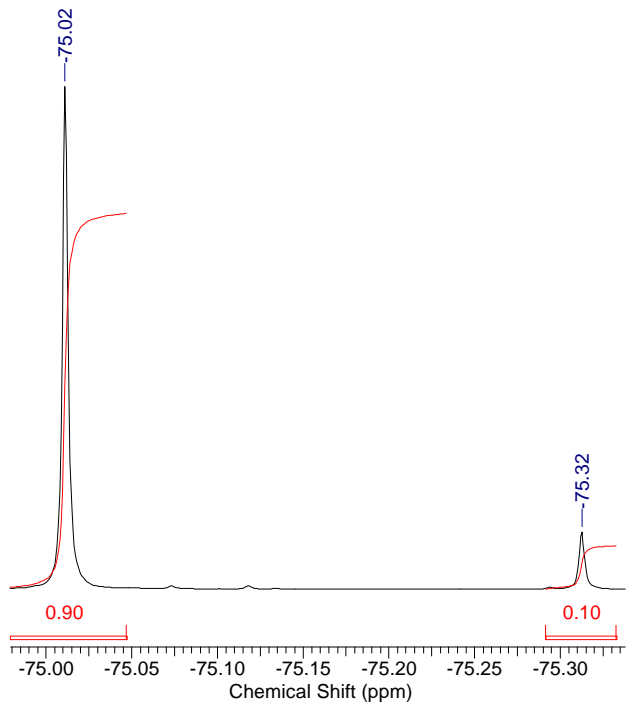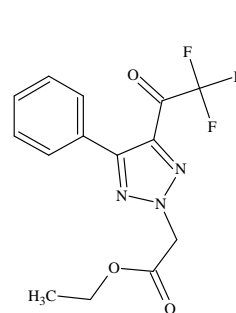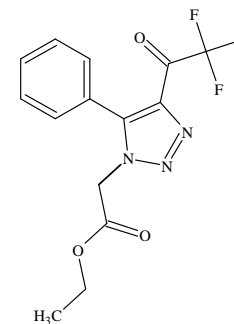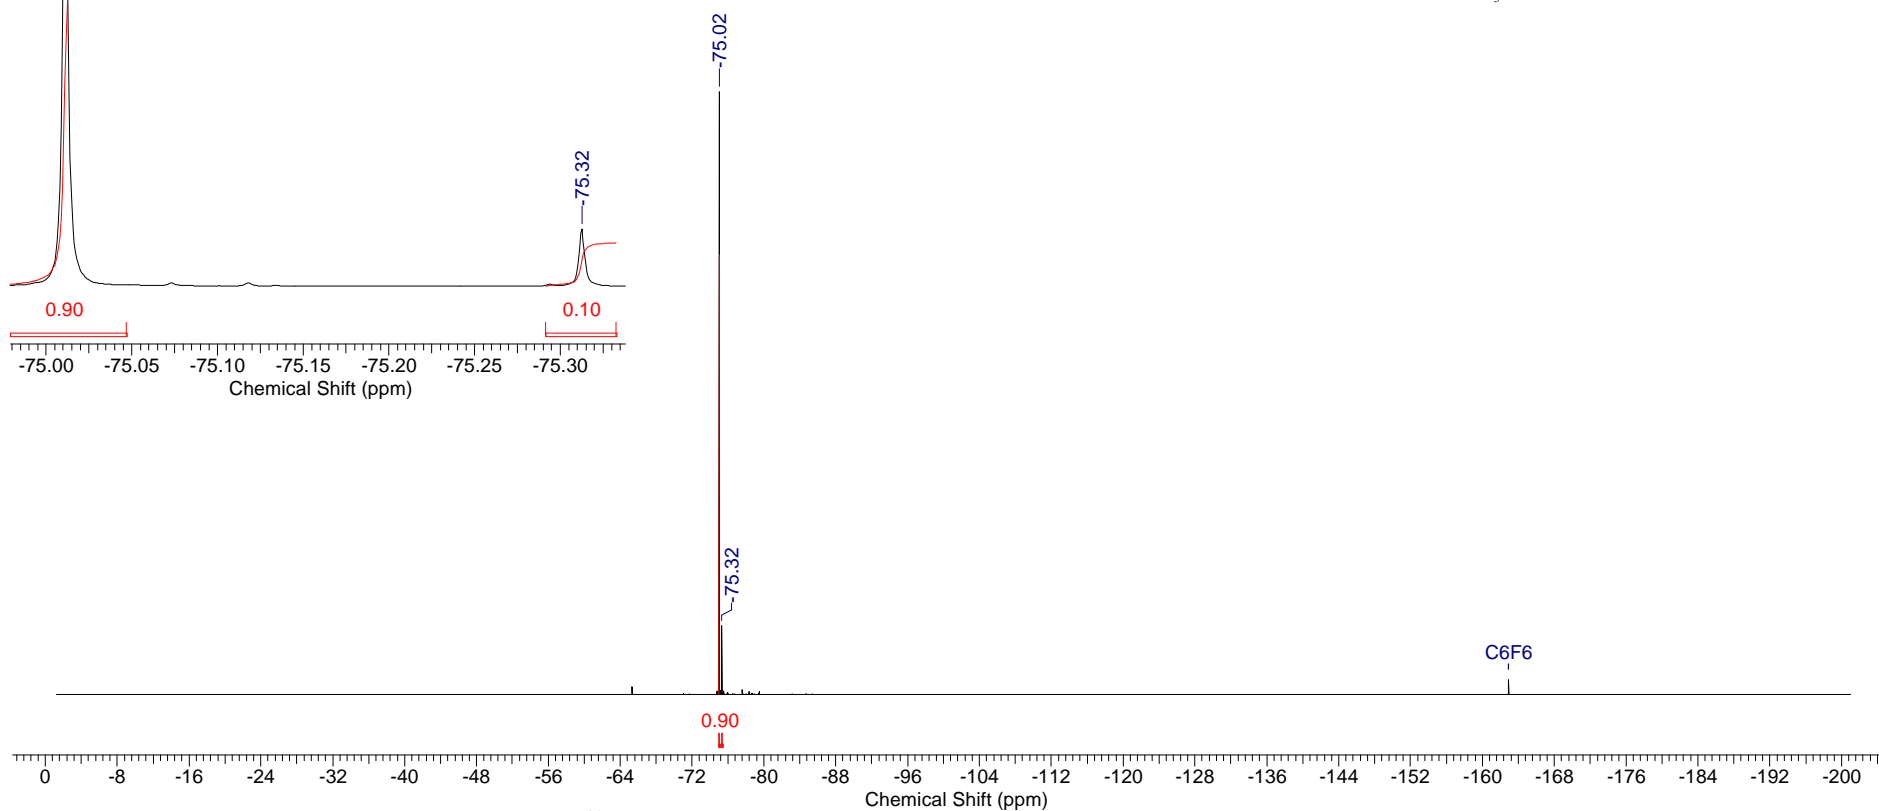

<sup>19</sup>F NMR spectrum of mixture of **3o** and **4o** (376.5 MHz, CDCl<sub>3</sub>)

|                               |                                                     |                             |                      |                              |                         |                      |                               |        |
|-------------------------------|-----------------------------------------------------|-----------------------------|----------------------|------------------------------|-------------------------|----------------------|-------------------------------|--------|
| <b>Acquisition Time (sec)</b> | 4.0894                                              | <b>Comment</b>              | Imported from UxNMR. |                              | <b>Date</b>             | 18 May 2022 17:12:22 |                               |        |
| <b>File Name</b>              | C:\DOCS\OUTPUT_301\2022\05.may\BM-2494-2p.H_001001r |                             |                      |                              | <b>Frequency (MHz)</b>  | 400.13               |                               |        |
| <b>Nucleus</b>                | 1H                                                  | <b>Number of Transients</b> | 4                    | <b>Original Points Count</b> | 32768                   | <b>Points Count</b>  | 131072                        |        |
| <b>Pulse Sequence</b>         | zg30                                                | <b>Solvent</b>              | BENZENE-D6           |                              | <b>Sweep Width (Hz)</b> | 8012.82              | <b>Temperature (degree C)</b> | 27.000 |

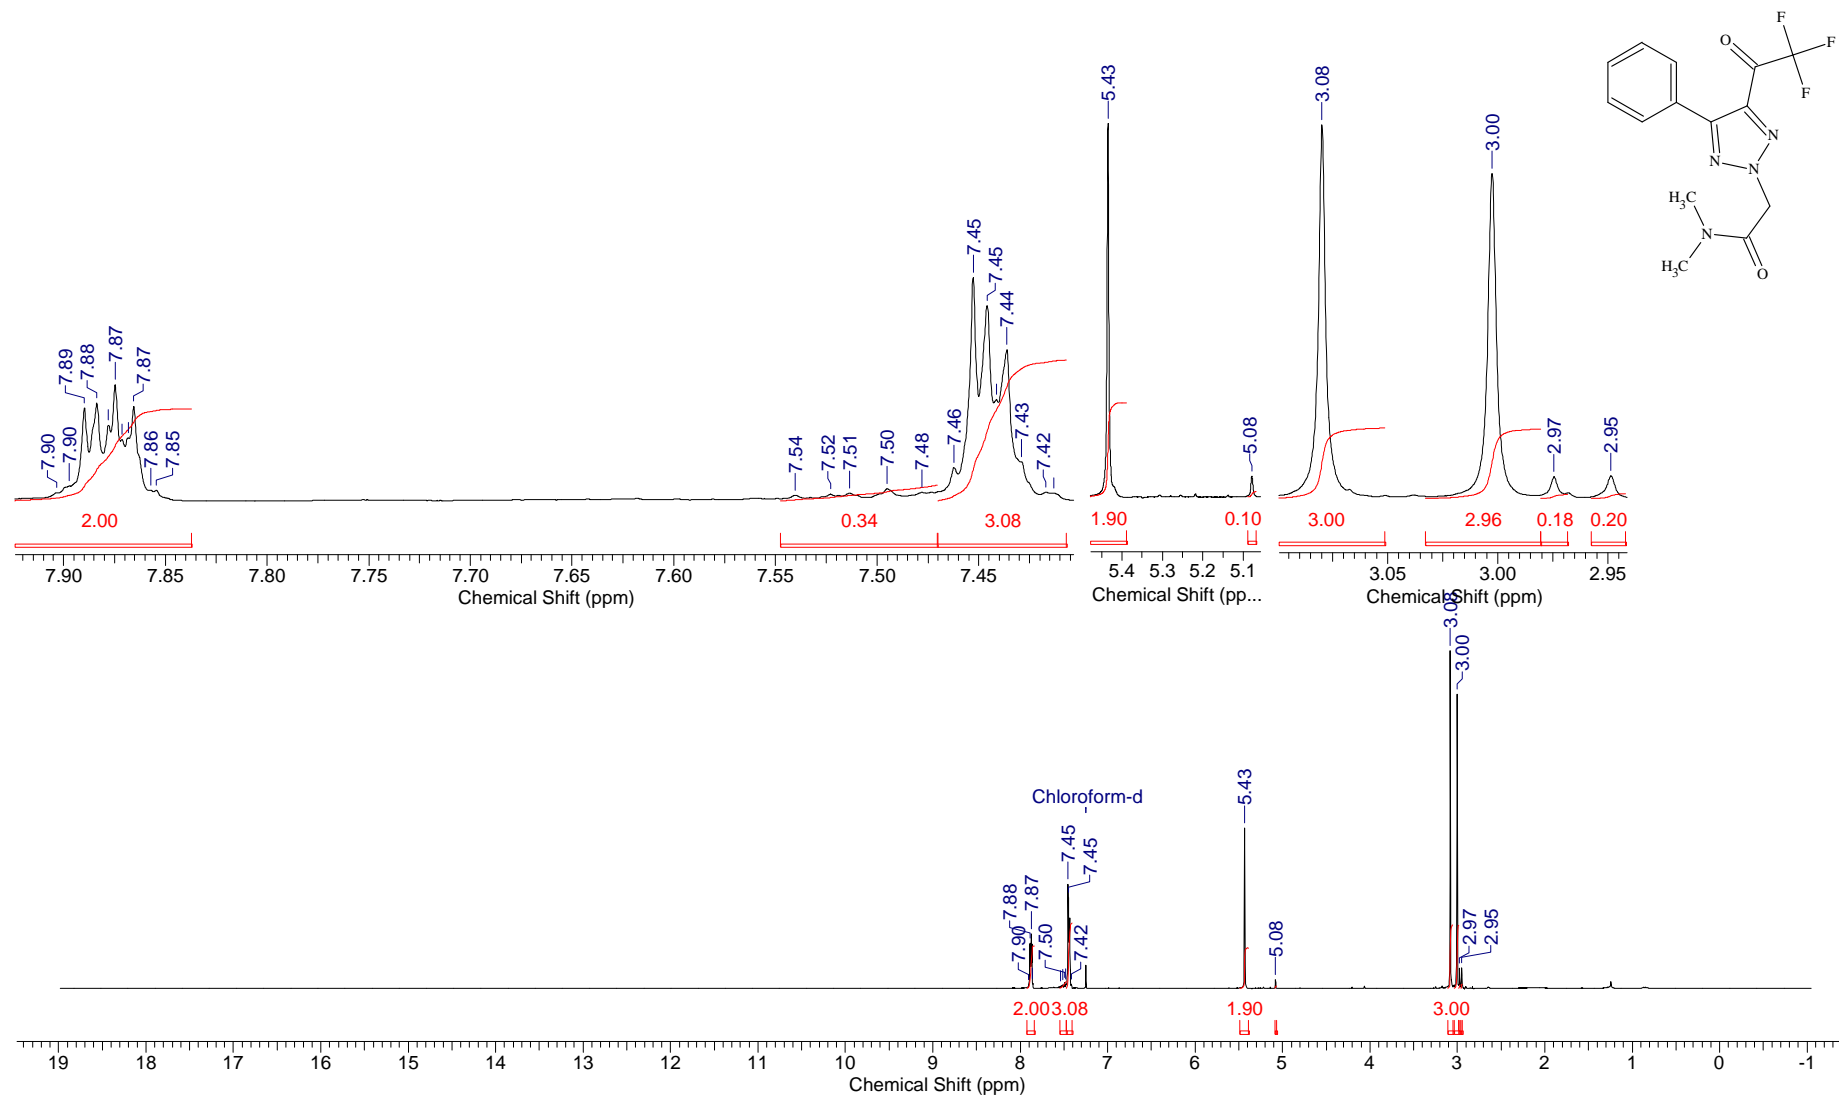

<sup>1</sup>H NMR spectrum of mixture of **3p** and **4p** (400.1 MHz, CDCl<sub>3</sub>)

|                               |                                                        |                             |                      |                              |                      |
|-------------------------------|--------------------------------------------------------|-----------------------------|----------------------|------------------------------|----------------------|
| <b>Acquisition Time (sec)</b> | 1.7433                                                 | <b>Comment</b>              | Imported from UXNMR. | <b>Date</b>                  | 18 Apr 2022 15:31:52 |
| <b>File Name</b>              | C:\DOCS\OUTPUT_301\2022\04.апрель\BM-2494-2c.F_005001r |                             |                      | <b>Frequency (MHz)</b>       | 376.50               |
| <b>Nucleus</b>                | <sup>19</sup> F                                        | <b>Number of Transients</b> | 16                   | <b>Original Points Count</b> | 131072               |
| <b>Pulse Sequence</b>         | zgfgqn                                                 | <b>Solvent</b>              | CHLOROFORM-D         | <b>Points Count</b>          | 262144               |
| <b>Temperature (degree C)</b> | 27.000                                                 |                             |                      | <b>Sweep Width (Hz)</b>      | 75187.97             |

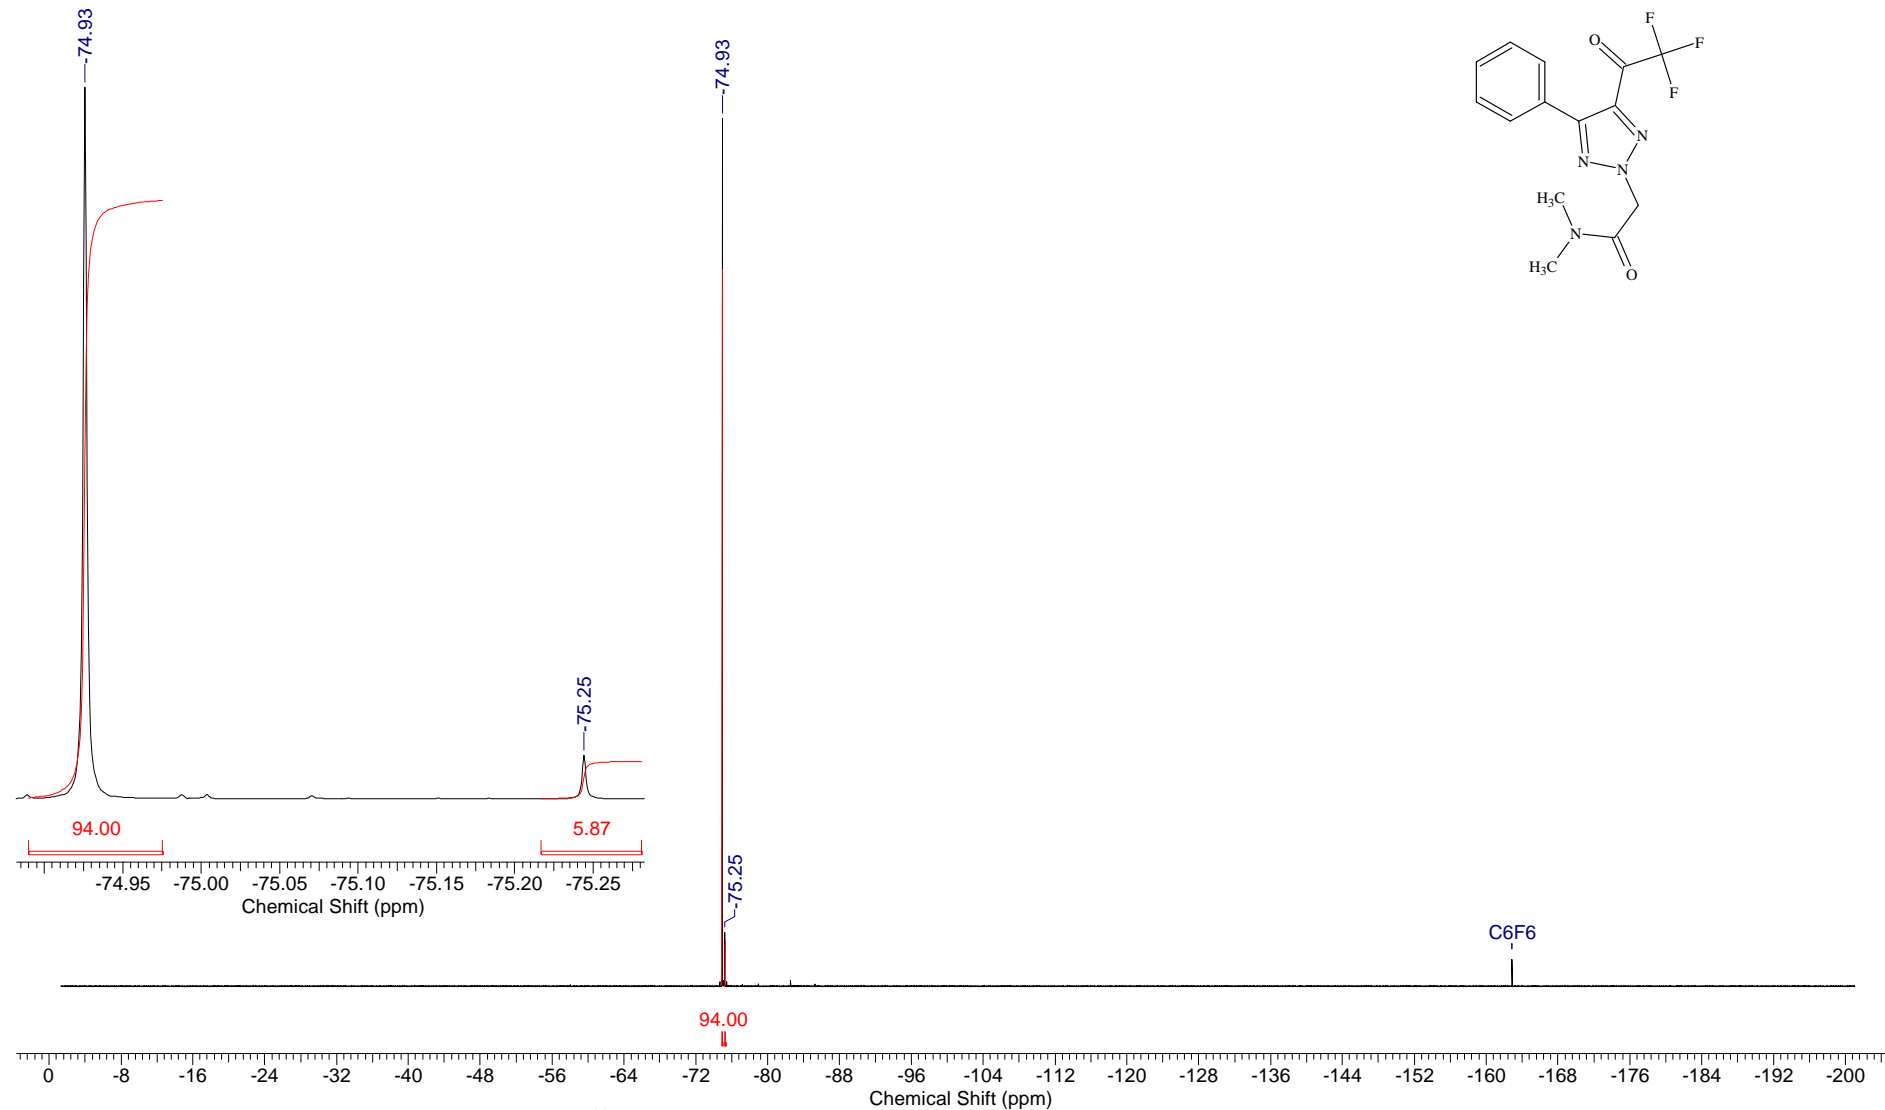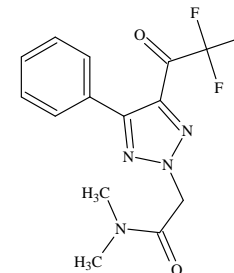

|                        |                                                                              |                      |                      |                       |                 |                        |        |
|------------------------|------------------------------------------------------------------------------|----------------------|----------------------|-----------------------|-----------------|------------------------|--------|
| Acquisition Time (sec) | 0.6783                                                                       | Comment              | Imported from UXNMR. |                       | Date            | 16 Apr 2022 14:05:18   |        |
| File Name              | C:\DOCS\BM\MP_COSED\I\2022\16-04-2022_14-19-08\BM-2494-2c\BM-2494-2c_002001r |                      |                      |                       | Frequency (MHz) | 100.61                 |        |
| Nucleus                | 13C                                                                          | Number of Transients | 176                  | Original Points Count | 16384           | Points Count           | 131072 |
| Pulse Sequence         | zgpg30                                                                       | Solvent              | CHLOROFORM-D         | Sweep Width (Hz)      | 24154.59        | Temperature (degree C) | 27.000 |

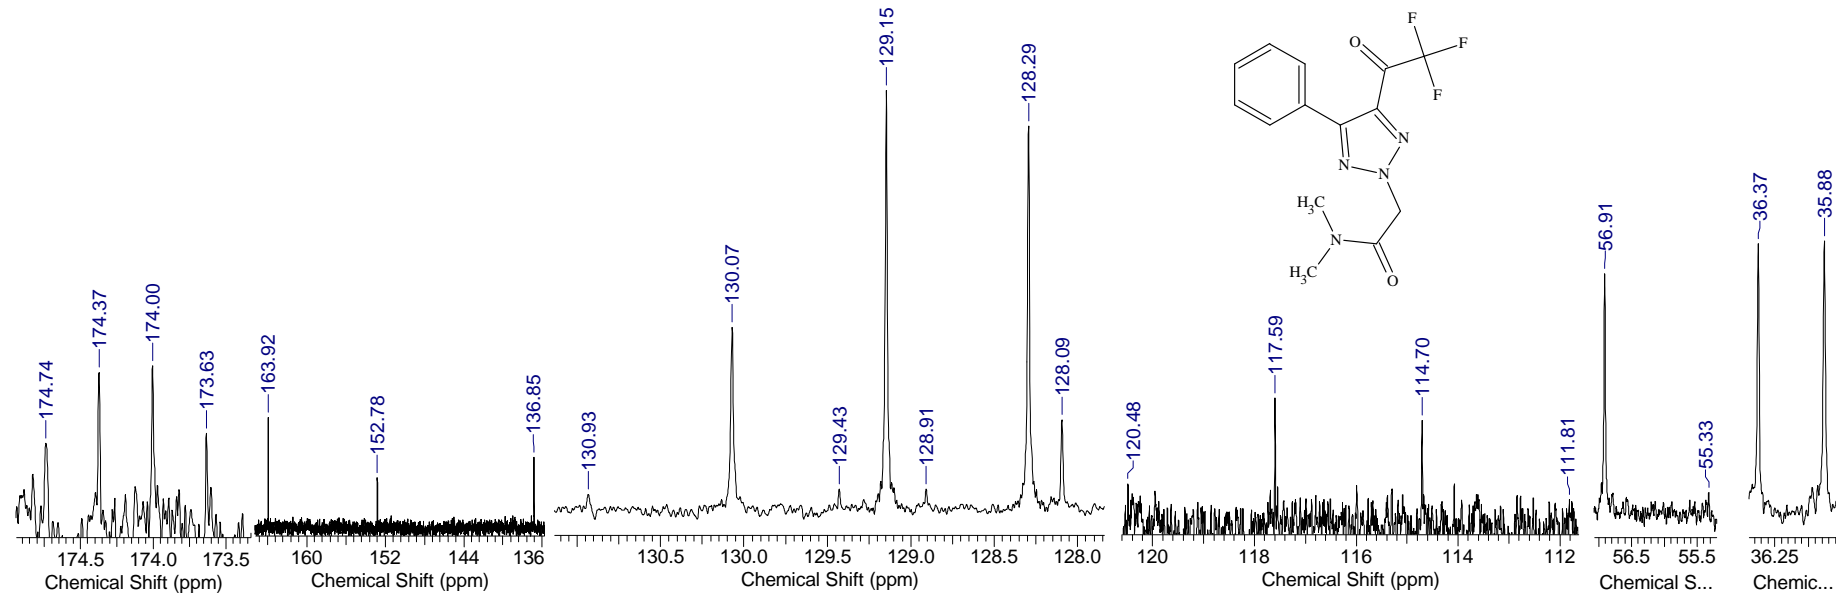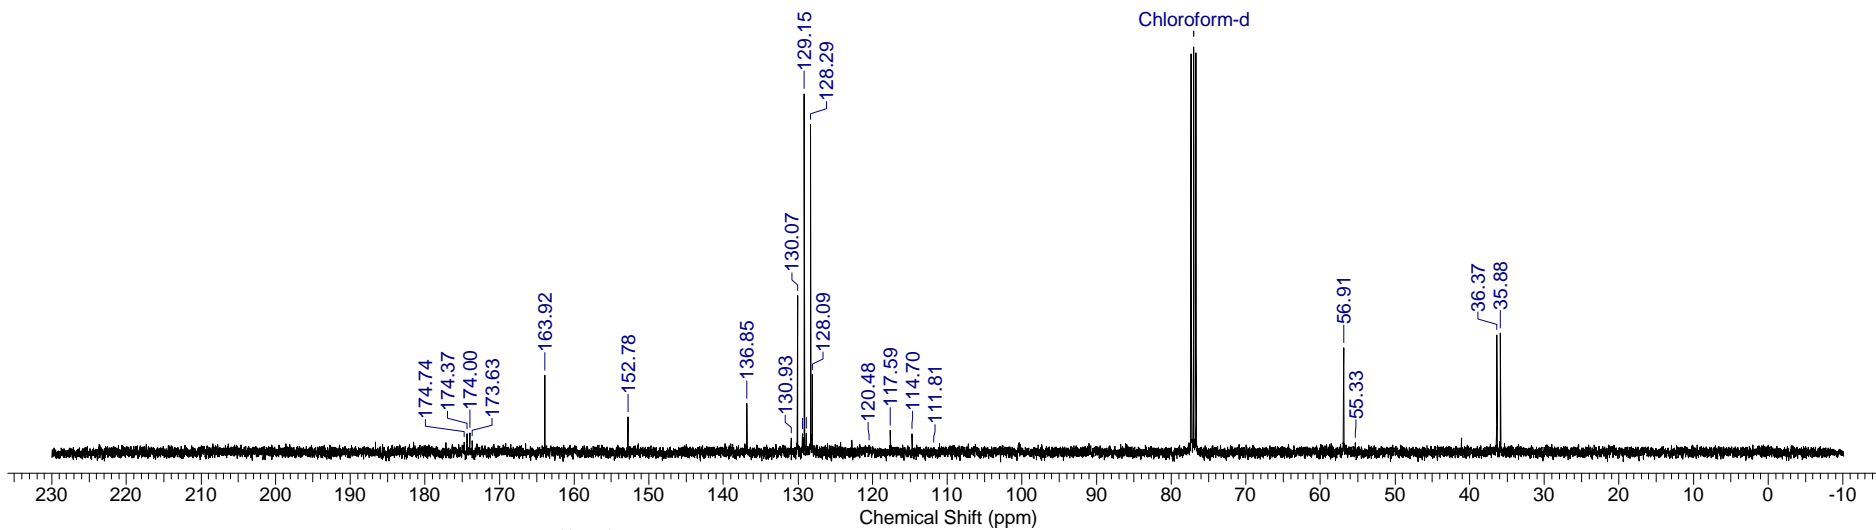

<sup>13</sup>C{<sup>1</sup>H} NMR spectrum of mixture of **3p** and **4p** (100.6 MHz, CDCl<sub>3</sub>)

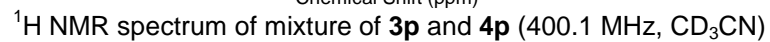



|                               |                                                       |                             |                      |                              |                      |
|-------------------------------|-------------------------------------------------------|-----------------------------|----------------------|------------------------------|----------------------|
| <b>Acquisition Time (sec)</b> | 1.7433                                                | <b>Comment</b>              | Imported from UXNMR. | <b>Date</b>                  | 14 Apr 2022 12:37:52 |
| <b>File Name</b>              | C:\DOCS\OUTPUT_301\2022\04.апрель\BM-2494-2.F_005001r |                             |                      | <b>Frequency (MHz)</b>       | 376.50               |
| <b>Nucleus</b>                | <sup>19</sup> F                                       | <b>Number of Transients</b> | 16                   | <b>Original Points Count</b> | 131072               |
| <b>Pulse Sequence</b>         | zgfgq                                                 | <b>Solvent</b>              | CHLOROFORM-D         | <b>Points Count</b>          | 262144               |
| <b>Temperature (degree C)</b> | 27.000                                                |                             |                      | <b>Sweep Width (Hz)</b>      | 75187.97             |

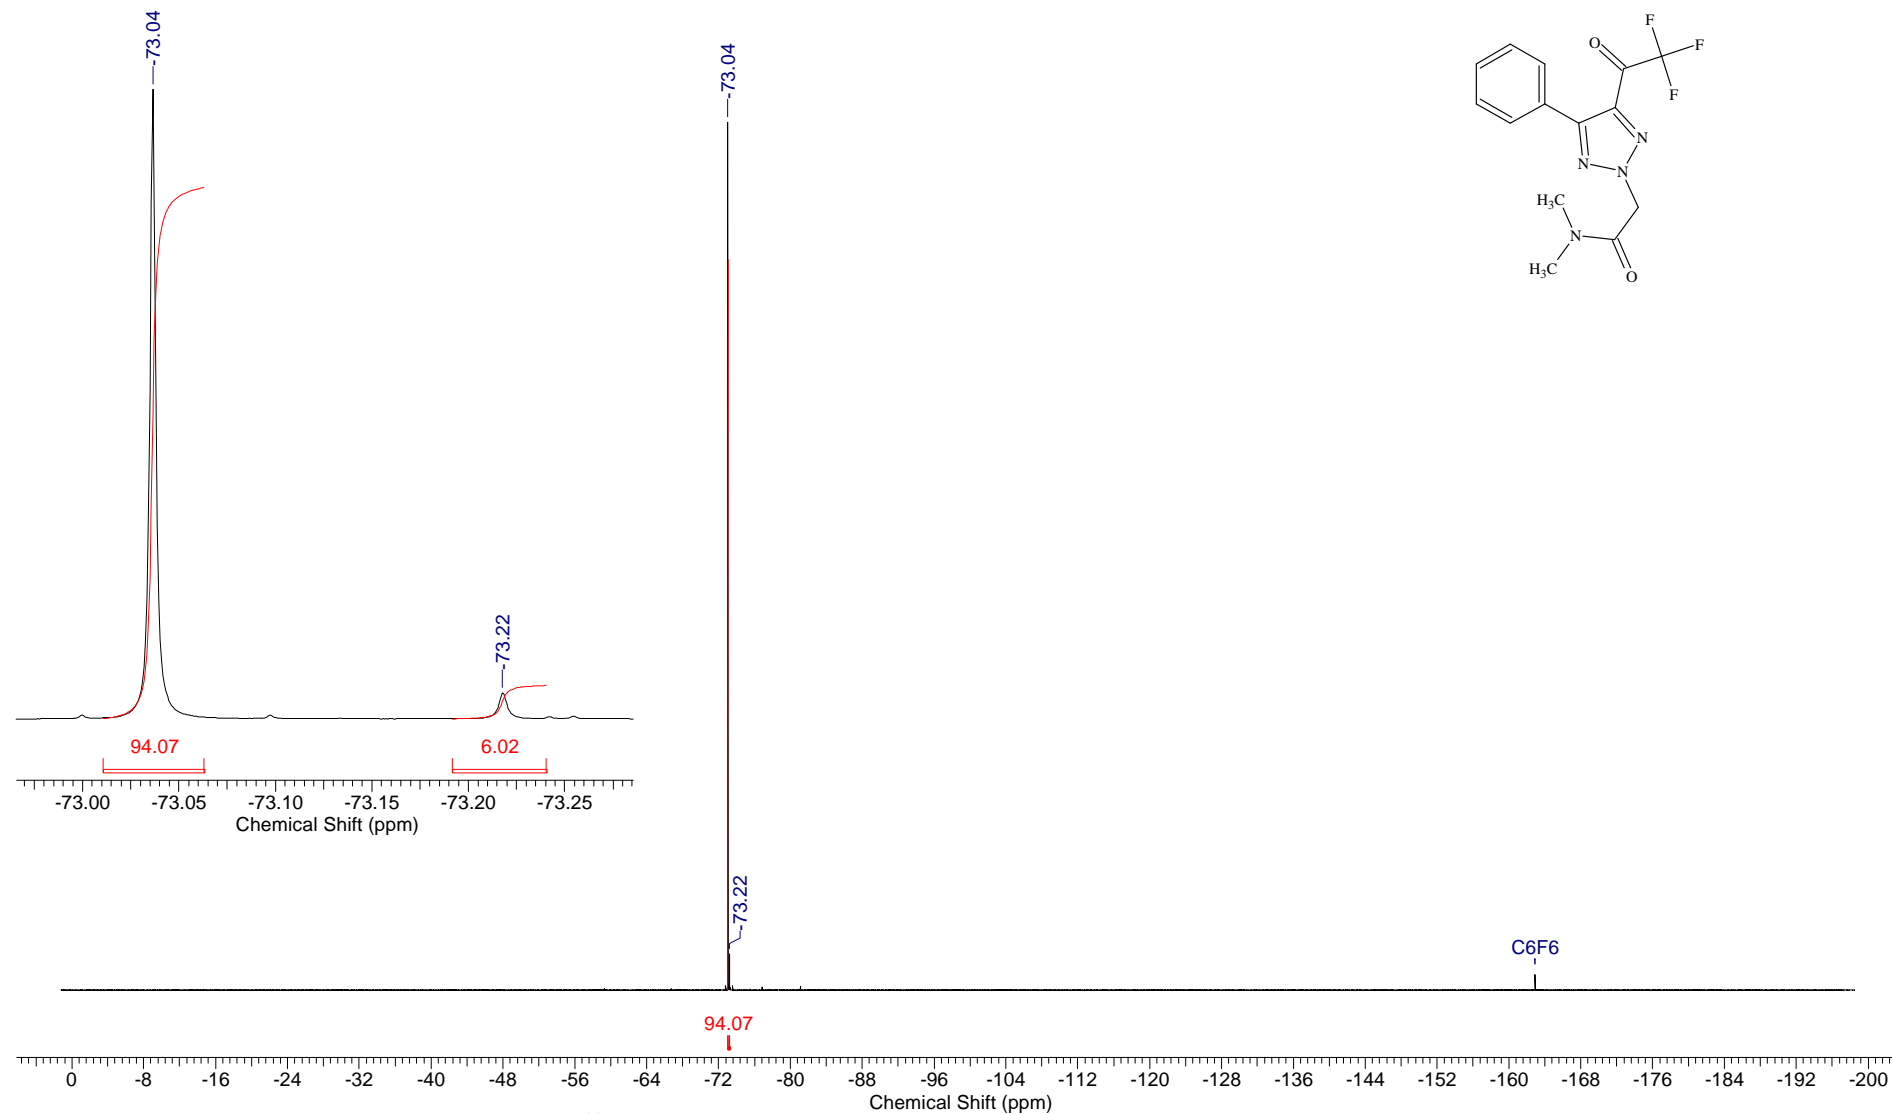

|                               |                                                       |                             |                      |                              |                      |
|-------------------------------|-------------------------------------------------------|-----------------------------|----------------------|------------------------------|----------------------|
| <b>Acquisition Time (sec)</b> | 0.6783                                                | <b>Comment</b>              | Imported from UXNMR. | <b>Date</b>                  | 14 Apr 2022 13:05:18 |
| <b>File Name</b>              | C:\DOCS\OUTPUT_301\2022\04.апрель\BM-2494-2.C_002001r | <b>Frequency (MHz)</b>      | 100.61               | <b>Points Count</b>          | 131072               |
| <b>Nucleus</b>                | <sup>13</sup> C                                       | <b>Number of Transients</b> | 601                  | <b>Original Points Count</b> | 16384                |
| <b>Pulse Sequence</b>         | zgpg30                                                | <b>Solvent</b>              | CHLOROFORM-D         | <b>Sweep Width (Hz)</b>      | 24154.59             |
| <b>Temperature (degree C)</b> | 27.000                                                |                             |                      |                              |                      |

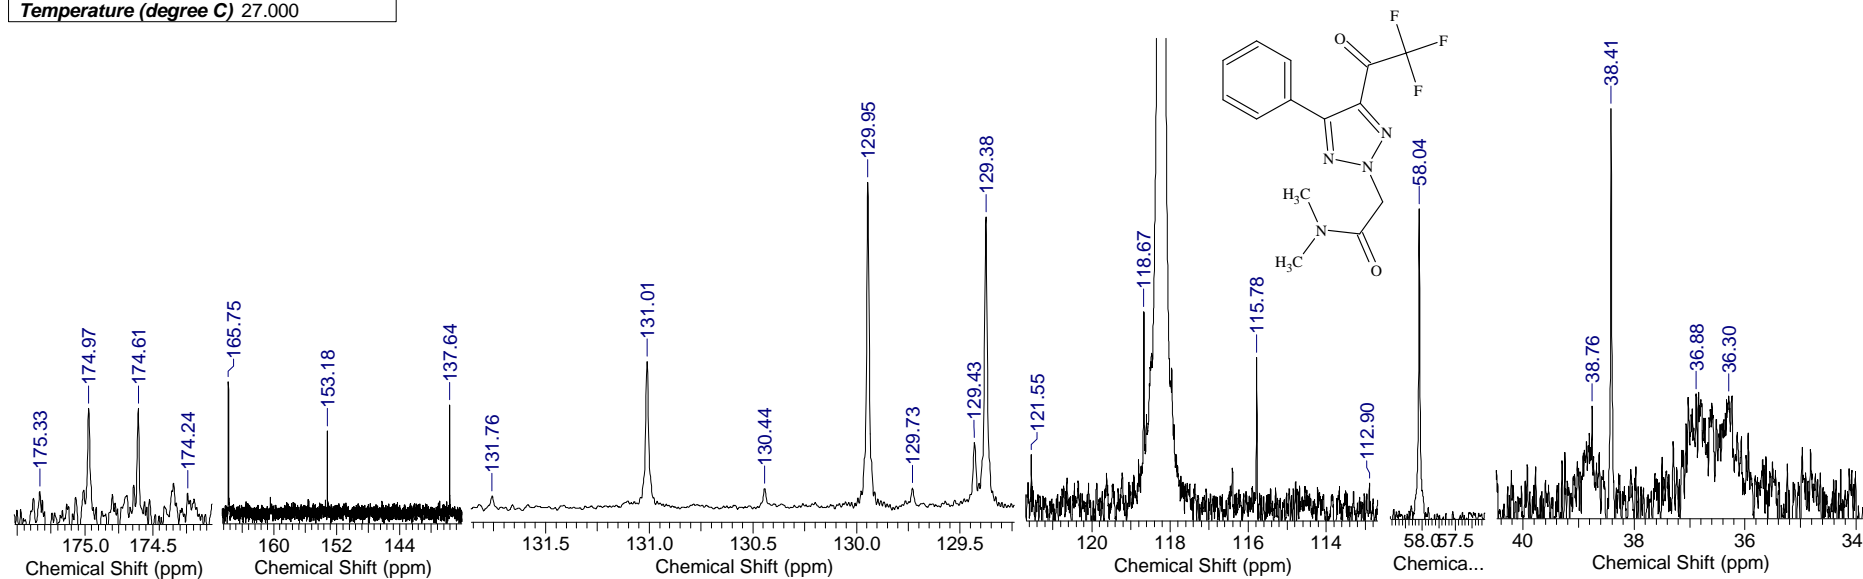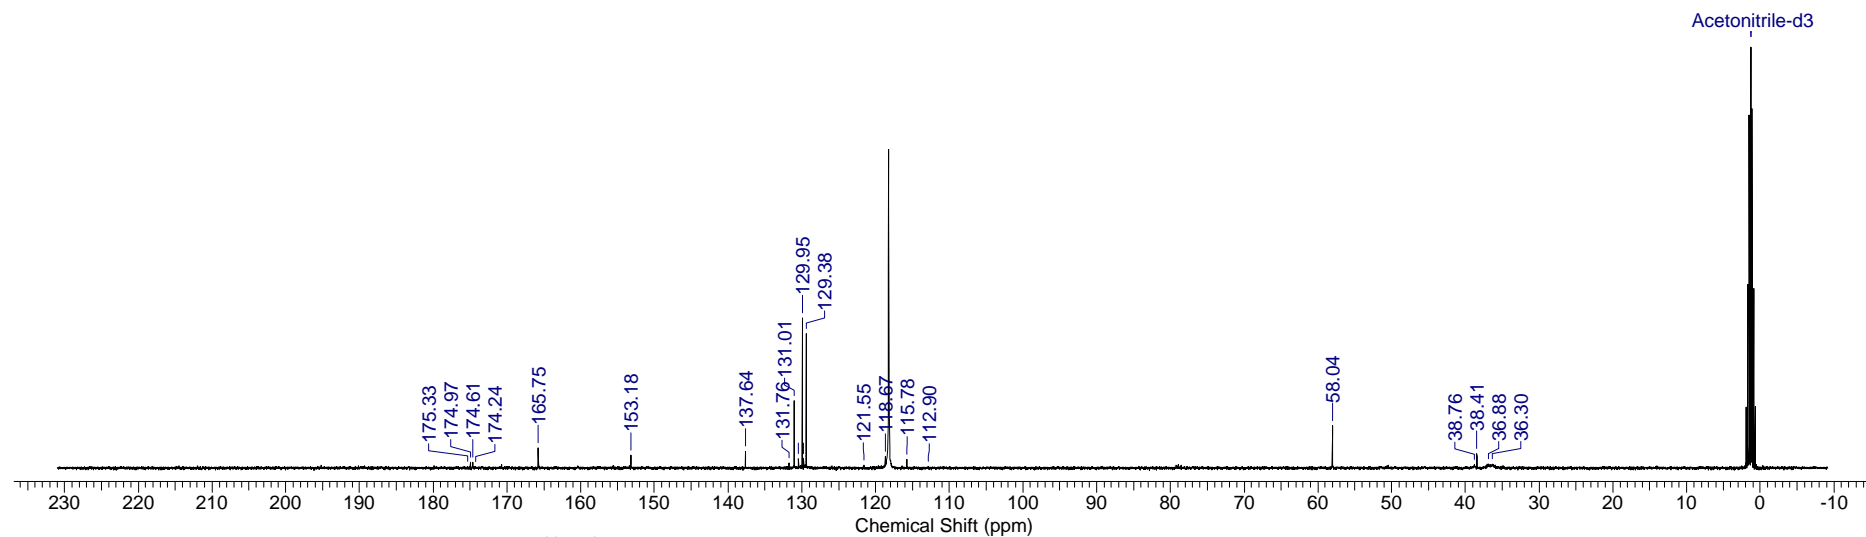

<sup>13</sup>C{<sup>1</sup>H} NMR spectrum of mixture of **3p** and **4p** (100.6 MHz, CD<sub>3</sub>CN)

|                        |                                                       |                      |                      |                       |                  |                      |        |
|------------------------|-------------------------------------------------------|----------------------|----------------------|-----------------------|------------------|----------------------|--------|
| Acquisition Time (sec) | 4.0894                                                | Comment              | Imported from UXNMR. |                       | Date             | 30 Mar 2022 17:23:40 |        |
| File Name              | C:\DOCS\OUTPUT_301\2022\03.mapr\SZA-BM-2470.H_001001r |                      |                      |                       | Frequency (MHz)  | 400.13               |        |
| Nucleus                | 1H                                                    | Number of Transients | 4                    | Original Points Count | 32768            | Points Count         | 131072 |
| Pulse Sequence         | zg30                                                  | Solvent              | CHLOROFORM-D         |                       | Sweep Width (Hz) | 8012.82              |        |
| Temperature (degree C) | 27.000                                                |                      |                      |                       |                  |                      |        |

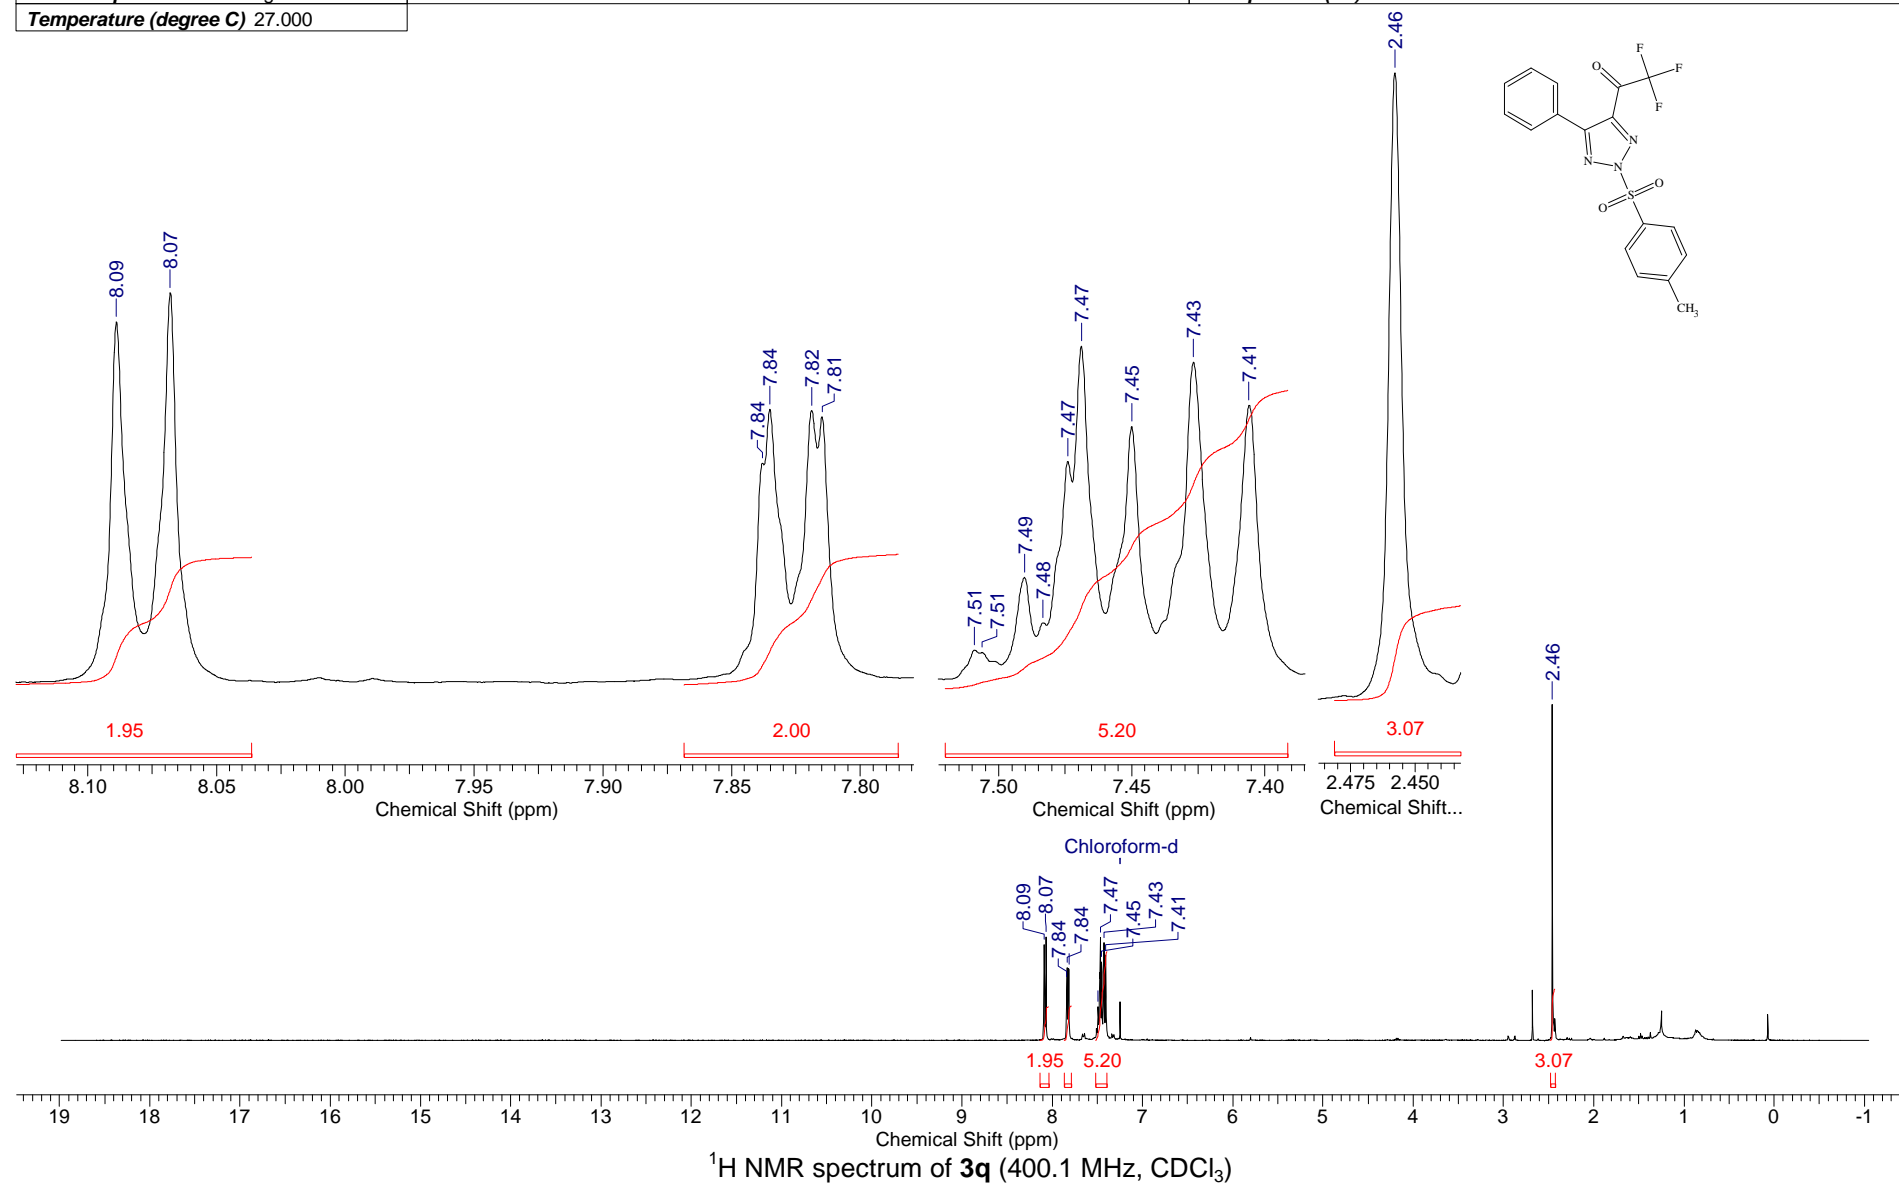

|                               |                                                      |                             |                      |                              |                      |
|-------------------------------|------------------------------------------------------|-----------------------------|----------------------|------------------------------|----------------------|
| <b>Acquisition Time (sec)</b> | 1.7433                                               | <b>Comment</b>              | Imported from UXNMR. | <b>Date</b>                  | 30 Mar 2022 17:49:38 |
| <b>File Name</b>              | C:\DOCS\OUTPUT_301\2022\03.mapr\SA-BM-2470.F_005001r | <b>Frequency (MHz)</b>      | 376.50               | <b>Points Count</b>          | 262144               |
| <b>Nucleus</b>                | <sup>19</sup> F                                      | <b>Number of Transients</b> | 16                   | <b>Original Points Count</b> | 131072               |
| <b>Pulse Sequence</b>         | zgfgqn                                               | <b>Solvent</b>              | CHLOROFORM-D         | <b>Sweep Width (Hz)</b>      | 75187.97             |
| <b>Temperature (degree C)</b> | 27.000                                               |                             |                      |                              |                      |

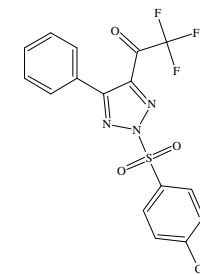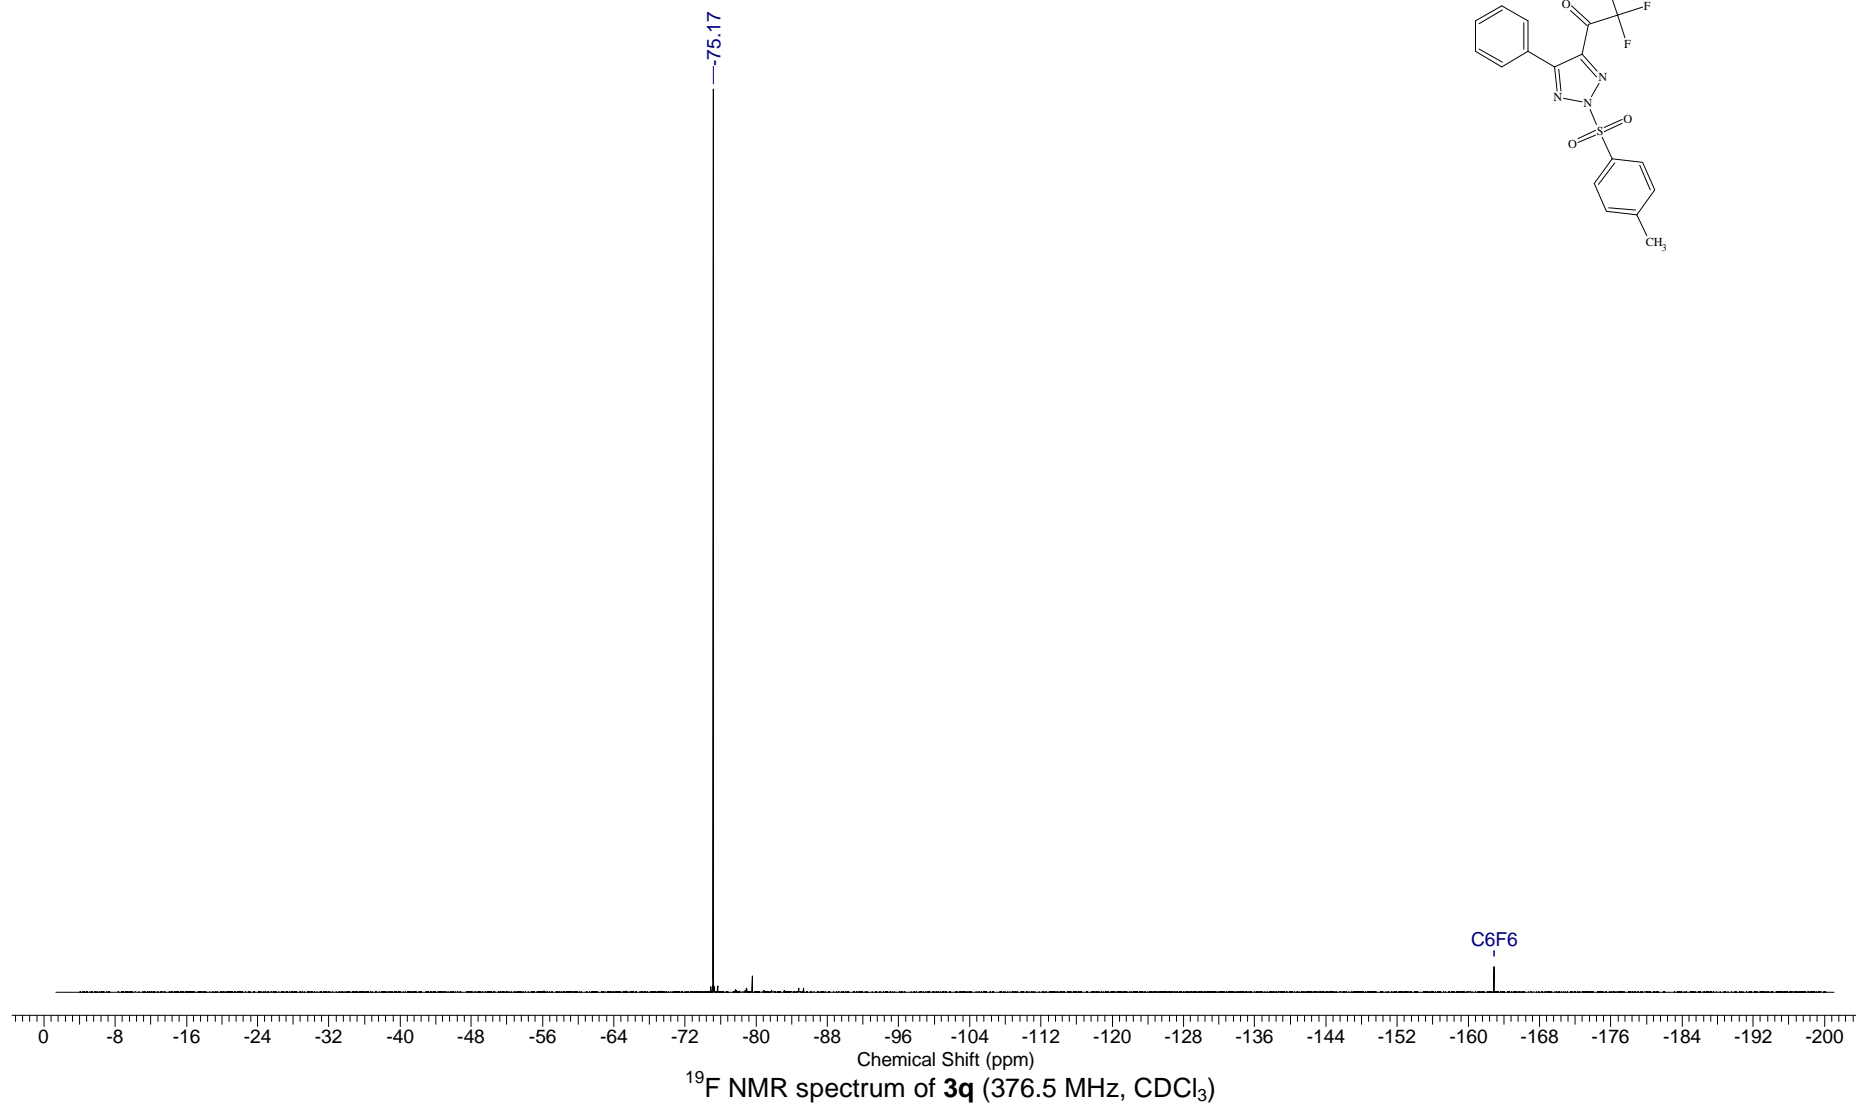

|                        |                                                      |                      |                      |                       |                 |                        |        |
|------------------------|------------------------------------------------------|----------------------|----------------------|-----------------------|-----------------|------------------------|--------|
| Acquisition Time (sec) | 0.6783                                               | Comment              | Imported from UXMNR. |                       | Date            | 31 Mar 2022 12:54:26   |        |
| File Name              | C:\DOCS\OUTPUT_301\2022\03.mapr\SA-BM-2470.C_002001r |                      |                      |                       | Frequency (MHz) | 100.61                 |        |
| Nucleus                | 13C                                                  | Number of Transients | 305                  | Original Points Count | 16384           | Points Count           | 131072 |
| Pulse Sequence         | zgpg30                                               | Solvent              | DMSO-D6              | Sweep Width (Hz)      | 24154.59        | Temperature (degree C) | 27.000 |

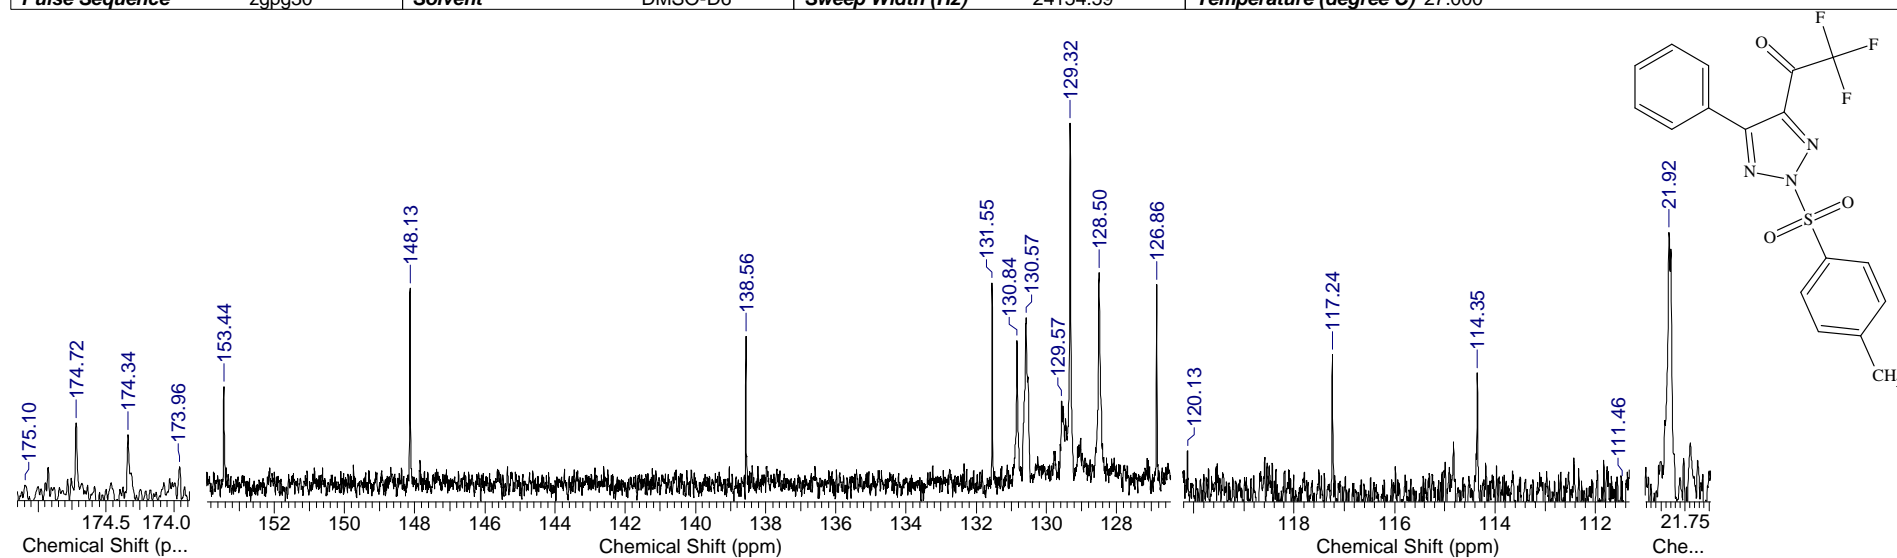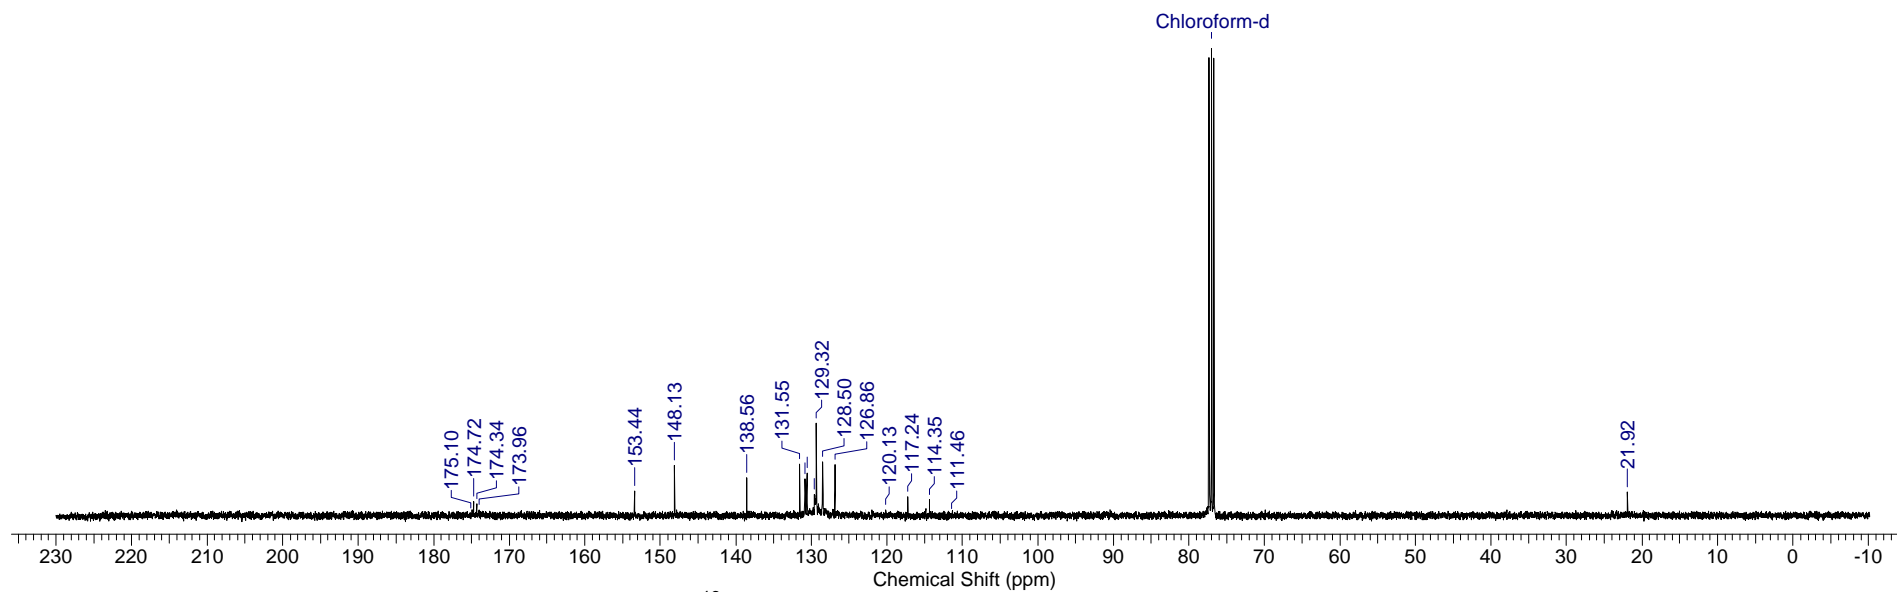<sup>13</sup>C NMR spectrum of **3q** (100.6 MHz, CDCl<sub>3</sub>)

|                        |                                                         |                      |                      |                       |                 |                        |        |
|------------------------|---------------------------------------------------------|----------------------|----------------------|-----------------------|-----------------|------------------------|--------|
| Acquisition Time (sec) | 4.0894                                                  | Comment              | Imported from UXNMR. |                       | Date            | 14 Apr 2022 11:55:20   |        |
| File Name              | C:\DOCS\OUTPUT_301\2022\04.апрель\SZA-BM-2498.H_001001r |                      |                      |                       | Frequency (MHz) | 400.13                 |        |
| Nucleus                | 1H                                                      | Number of Transients | 4                    | Original Points Count | 32768           | Points Count           | 131072 |
| Pulse Sequence         | zg30                                                    | Solvent              | BENZENE-D6           | Sweep Width (Hz)      | 8012.82         | Temperature (degree C) | 27.000 |

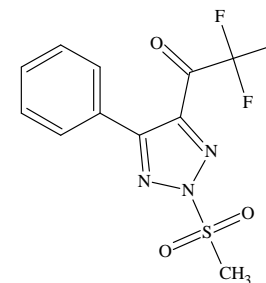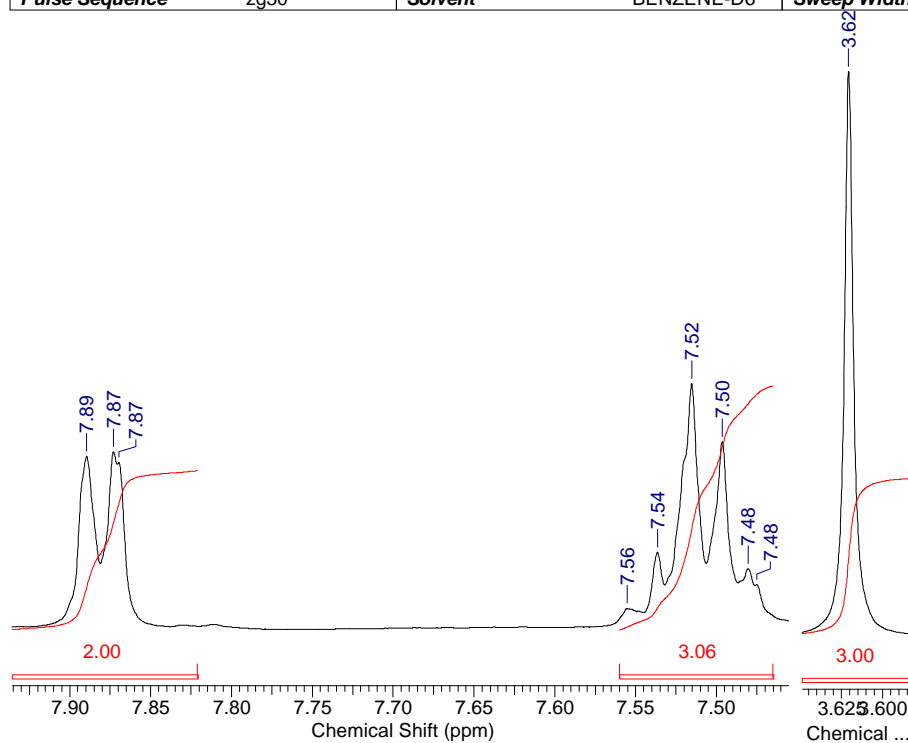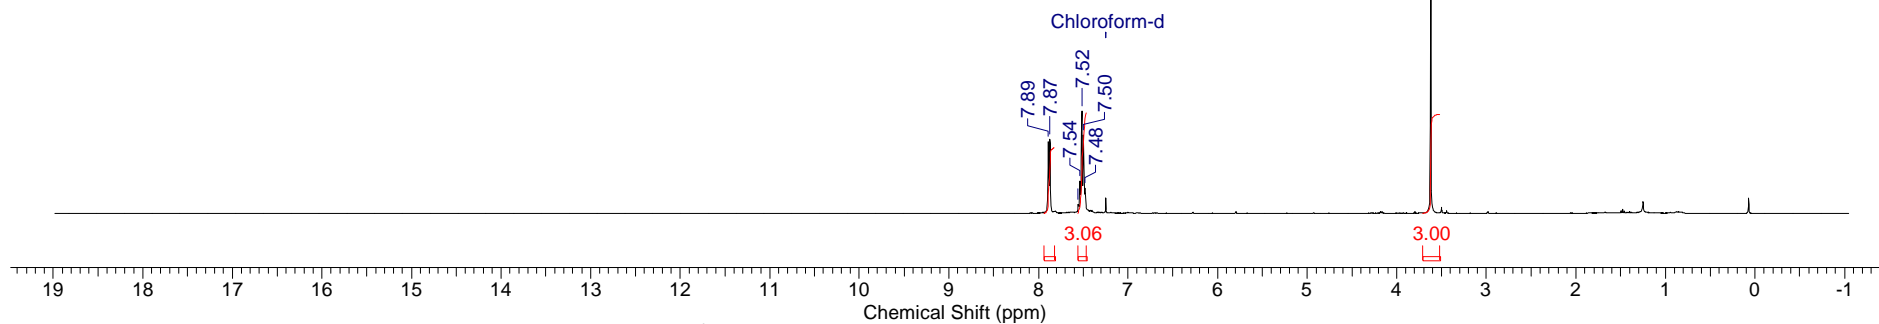

<sup>1</sup>H NMR spectrum of **3r** (400.1 MHz, CDCl<sub>3</sub>)

|                               |                                                        |                             |                      |                              |                      |
|-------------------------------|--------------------------------------------------------|-----------------------------|----------------------|------------------------------|----------------------|
| <b>Acquisition Time (sec)</b> | 1.7433                                                 | <b>Comment</b>              | Imported from UXNMR. | <b>Date</b>                  | 14 Apr 2022 13:21:22 |
| <b>File Name</b>              | C:\DOCS\OUTPUT_301\2022\04.апрель\SA-BM-2498.F_005001r | <b>Frequency (MHz)</b>      | 376.50               |                              |                      |
| <b>Nucleus</b>                | <sup>19</sup> F                                        | <b>Number of Transients</b> | 16                   | <b>Original Points Count</b> | 131072               |
| <b>Pulse Sequence</b>         | zgfgqn                                                 | <b>Points Count</b>         | 262144               | <b>Sweep Width (Hz)</b>      | 75187.97             |
| <b>Temperature (degree C)</b> | 27.000                                                 | <b>Solvent</b>              | CHLOROFORM-D         |                              |                      |

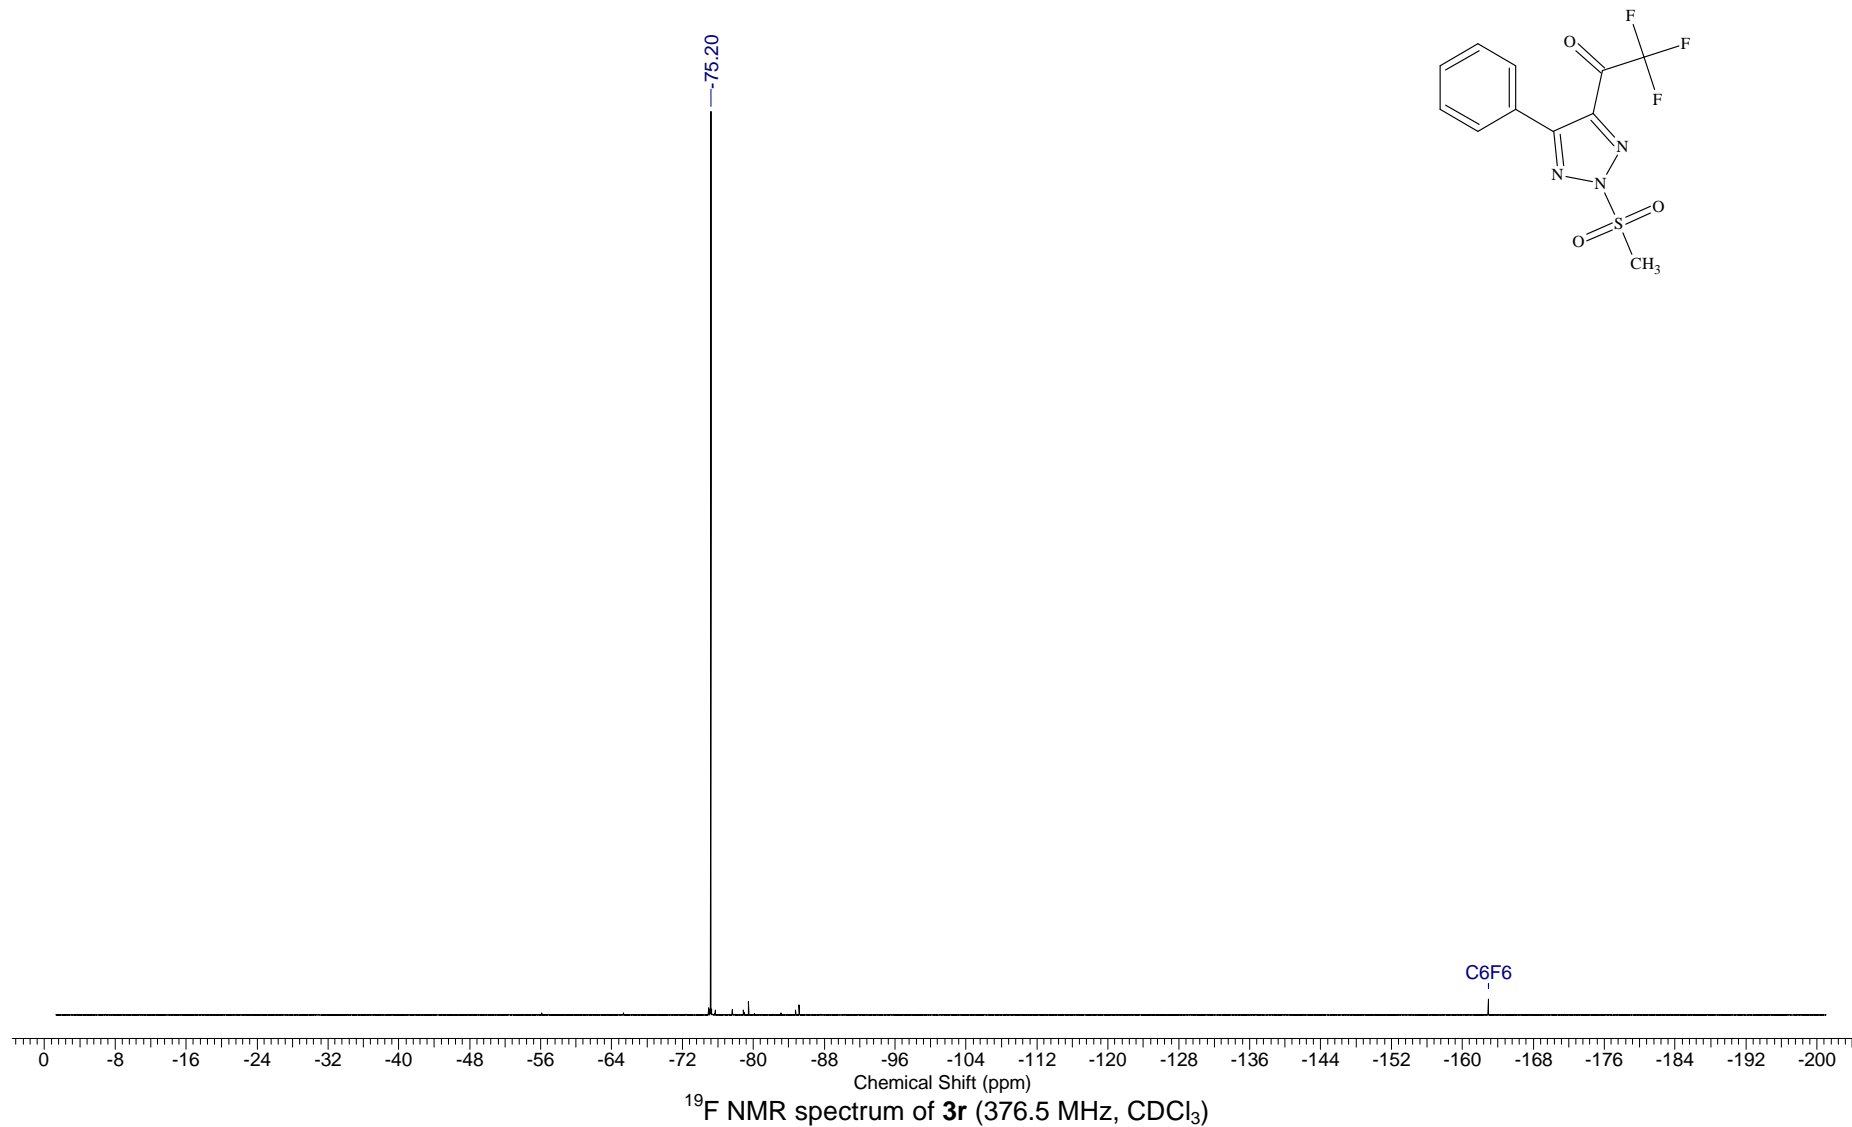

|                               |                                                        |                                     |              |                              |                      |
|-------------------------------|--------------------------------------------------------|-------------------------------------|--------------|------------------------------|----------------------|
| <b>Acquisition Time (sec)</b> | 0.6783                                                 | <b>Comment</b> Imported from UXNMR. |              | <b>Date</b>                  | 15 Apr 2022 16:00:22 |
| <b>File Name</b>              | C:\DOCS\OUTPUT_301\2022\04.апрель\SA-BM-2498.C_002001r |                                     |              | <b>Frequency (MHz)</b>       | 100.61               |
| <b>Nucleus</b>                | <sup>13</sup> C                                        | <b>Number of Transients</b>         | 201          | <b>Original Points Count</b> | 16384                |
| <b>Pulse Sequence</b>         | zgpg30                                                 | <b>Solvent</b>                      | CHLOROFORM-D | <b>Points Count</b>          | 131072               |
| <b>Temperature (degree C)</b> | 27.000                                                 |                                     |              | <b>Sweep Width (Hz)</b>      | 24154.59             |

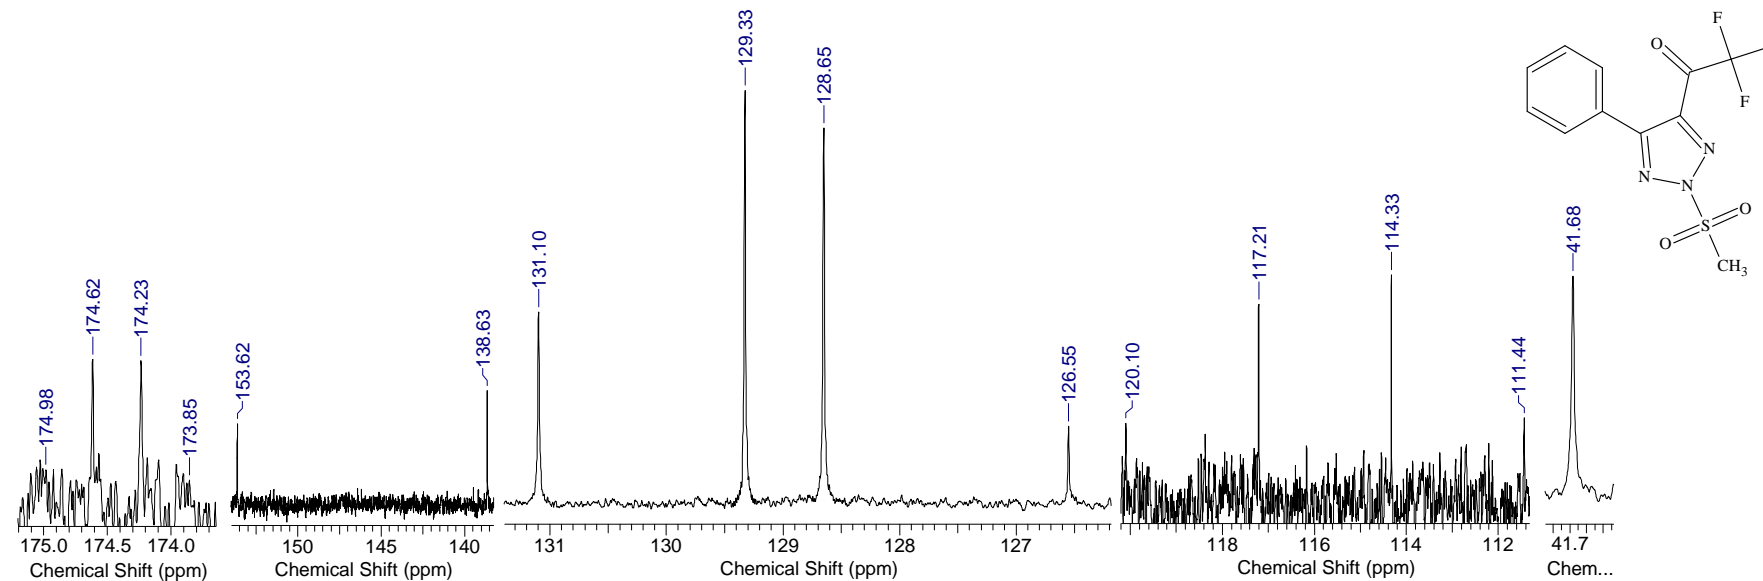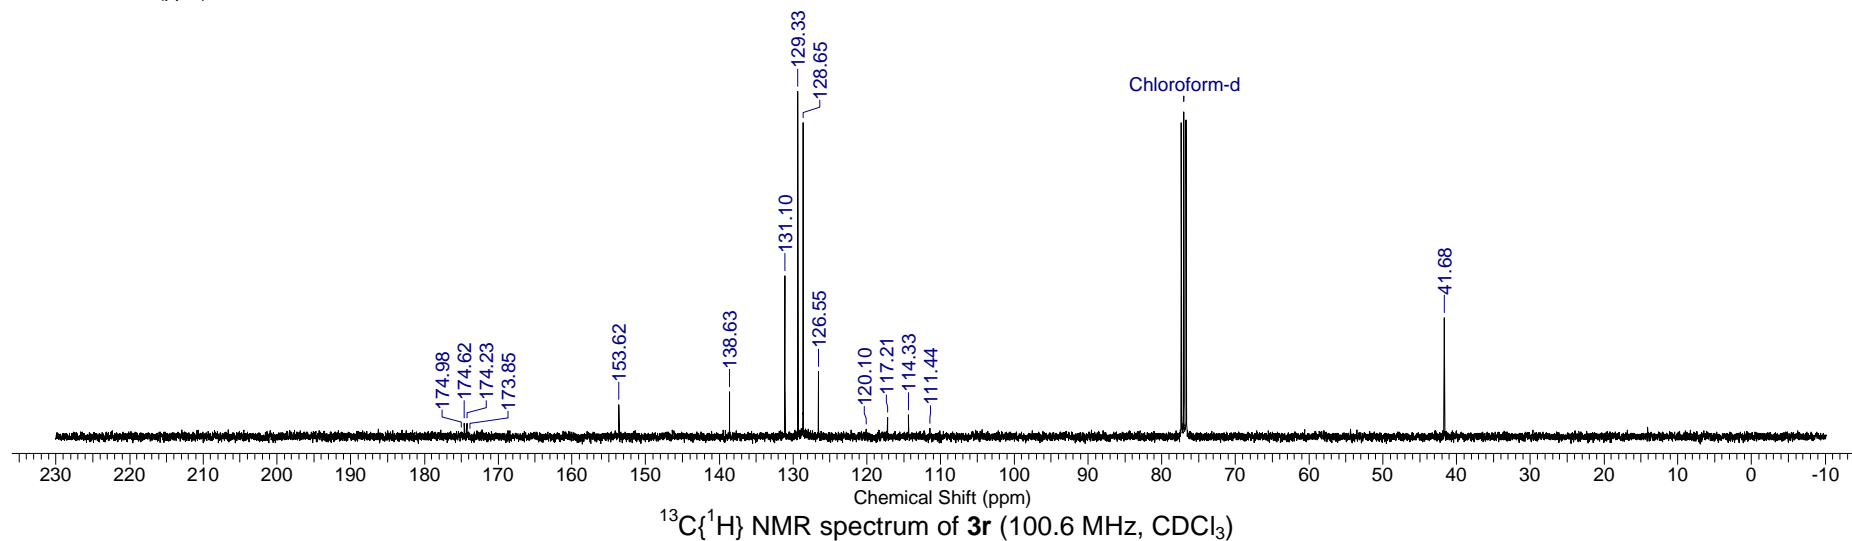



|                        |                                                     |                      |                      |                       |                  |                      |        |
|------------------------|-----------------------------------------------------|----------------------|----------------------|-----------------------|------------------|----------------------|--------|
| Acquisition Time (sec) | 4.0894                                              | Comment              | Imported from UXMNR. |                       | Date             | 22 Mar 2022 15:43:50 |        |
| File Name              | C:\DOCS\OUTPUT_301\2022\03.map\BM-2461-1p.H_001001r |                      |                      |                       | Frequency (MHz)  | 400.13               |        |
| Nucleus                | 1H                                                  | Number of Transients | 4                    | Original Points Count | 32768            | Points Count         | 131072 |
| Pulse Sequence         | zg30                                                | Solvent              | CHLOROFORM-D         |                       | Sweep Width (Hz) | 8012.82              |        |
| Temperature (degree C) | 27.000                                              |                      |                      |                       |                  |                      |        |

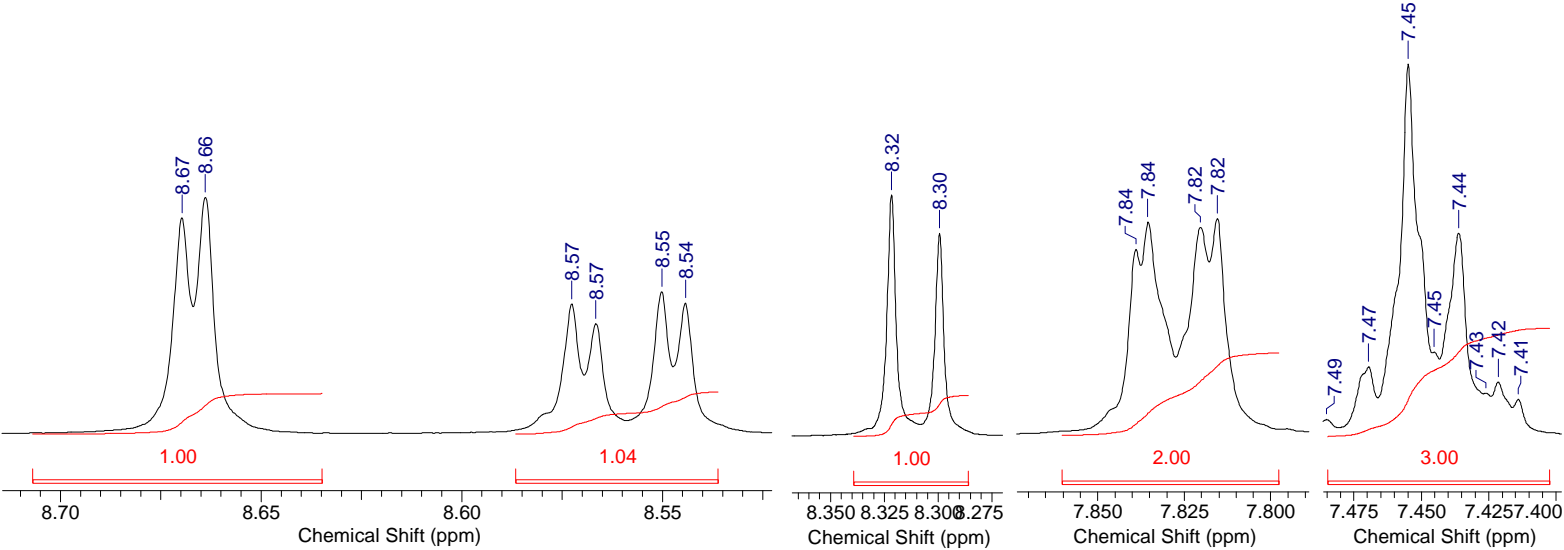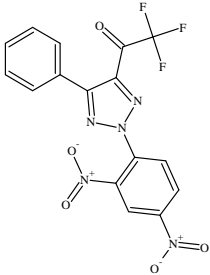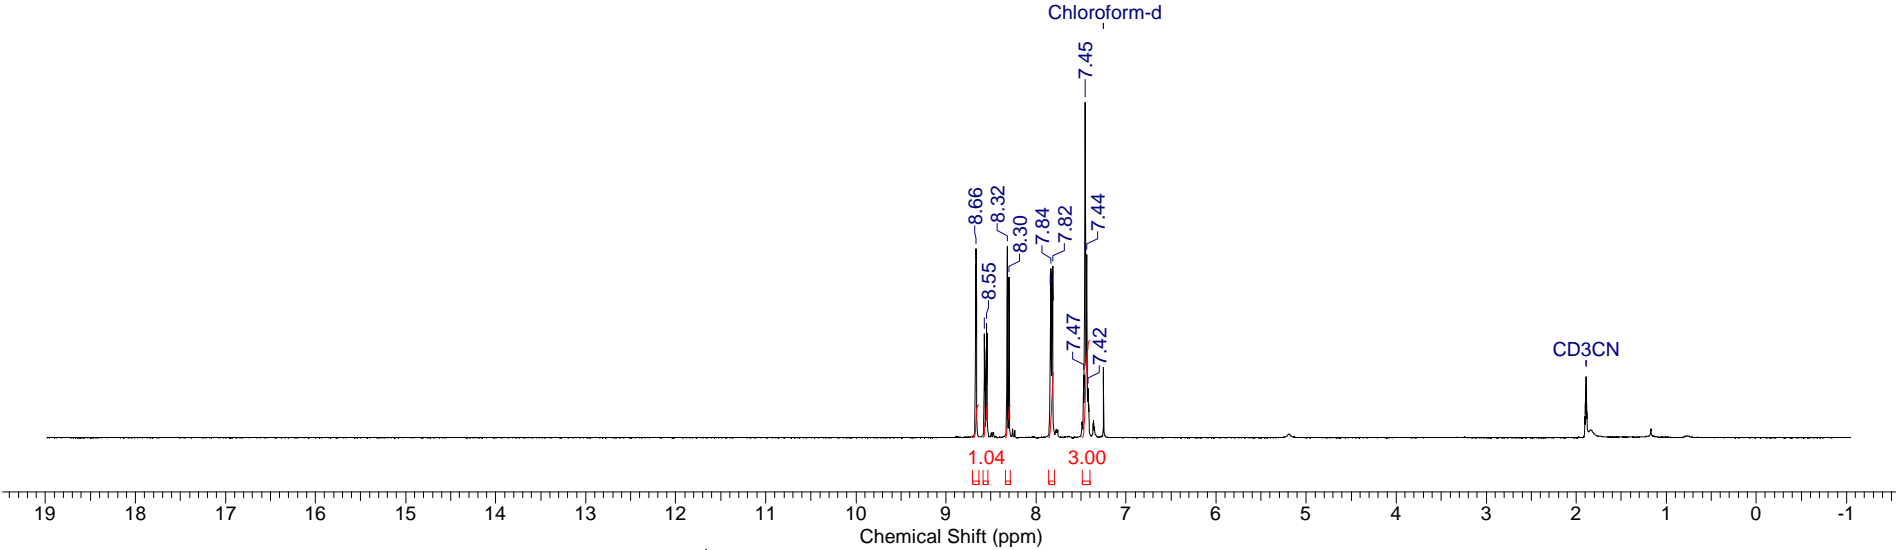

<sup>1</sup>H NMR spectrum of **5** (400.1 MHz, CDCl<sub>3</sub>)

|                        |                                                      |                      |                      |                       |                  |                      |        |
|------------------------|------------------------------------------------------|----------------------|----------------------|-----------------------|------------------|----------------------|--------|
| Acquisition Time (sec) | 1.7433                                               | Comment              | Imported from UXNMR. |                       | Date             | 22 Mar 2022 15:28:42 |        |
| File Name              | C:\DOCS\OUTPUT_301\2022\03.mapr\BM-2461-1p.F_005001r |                      |                      |                       | Frequency (MHz)  | 376.50               |        |
| Nucleus                | 19F                                                  | Number of Transients | 4                    | Original Points Count | 131072           | Points Count         | 262144 |
| Pulse Sequence         | zgfgn                                                | Solvent              | CHLOROFORM-D         |                       | Sweep Width (Hz) | 75187.97             |        |
| Temperature (degree C) | 27.000                                               |                      |                      |                       |                  |                      |        |

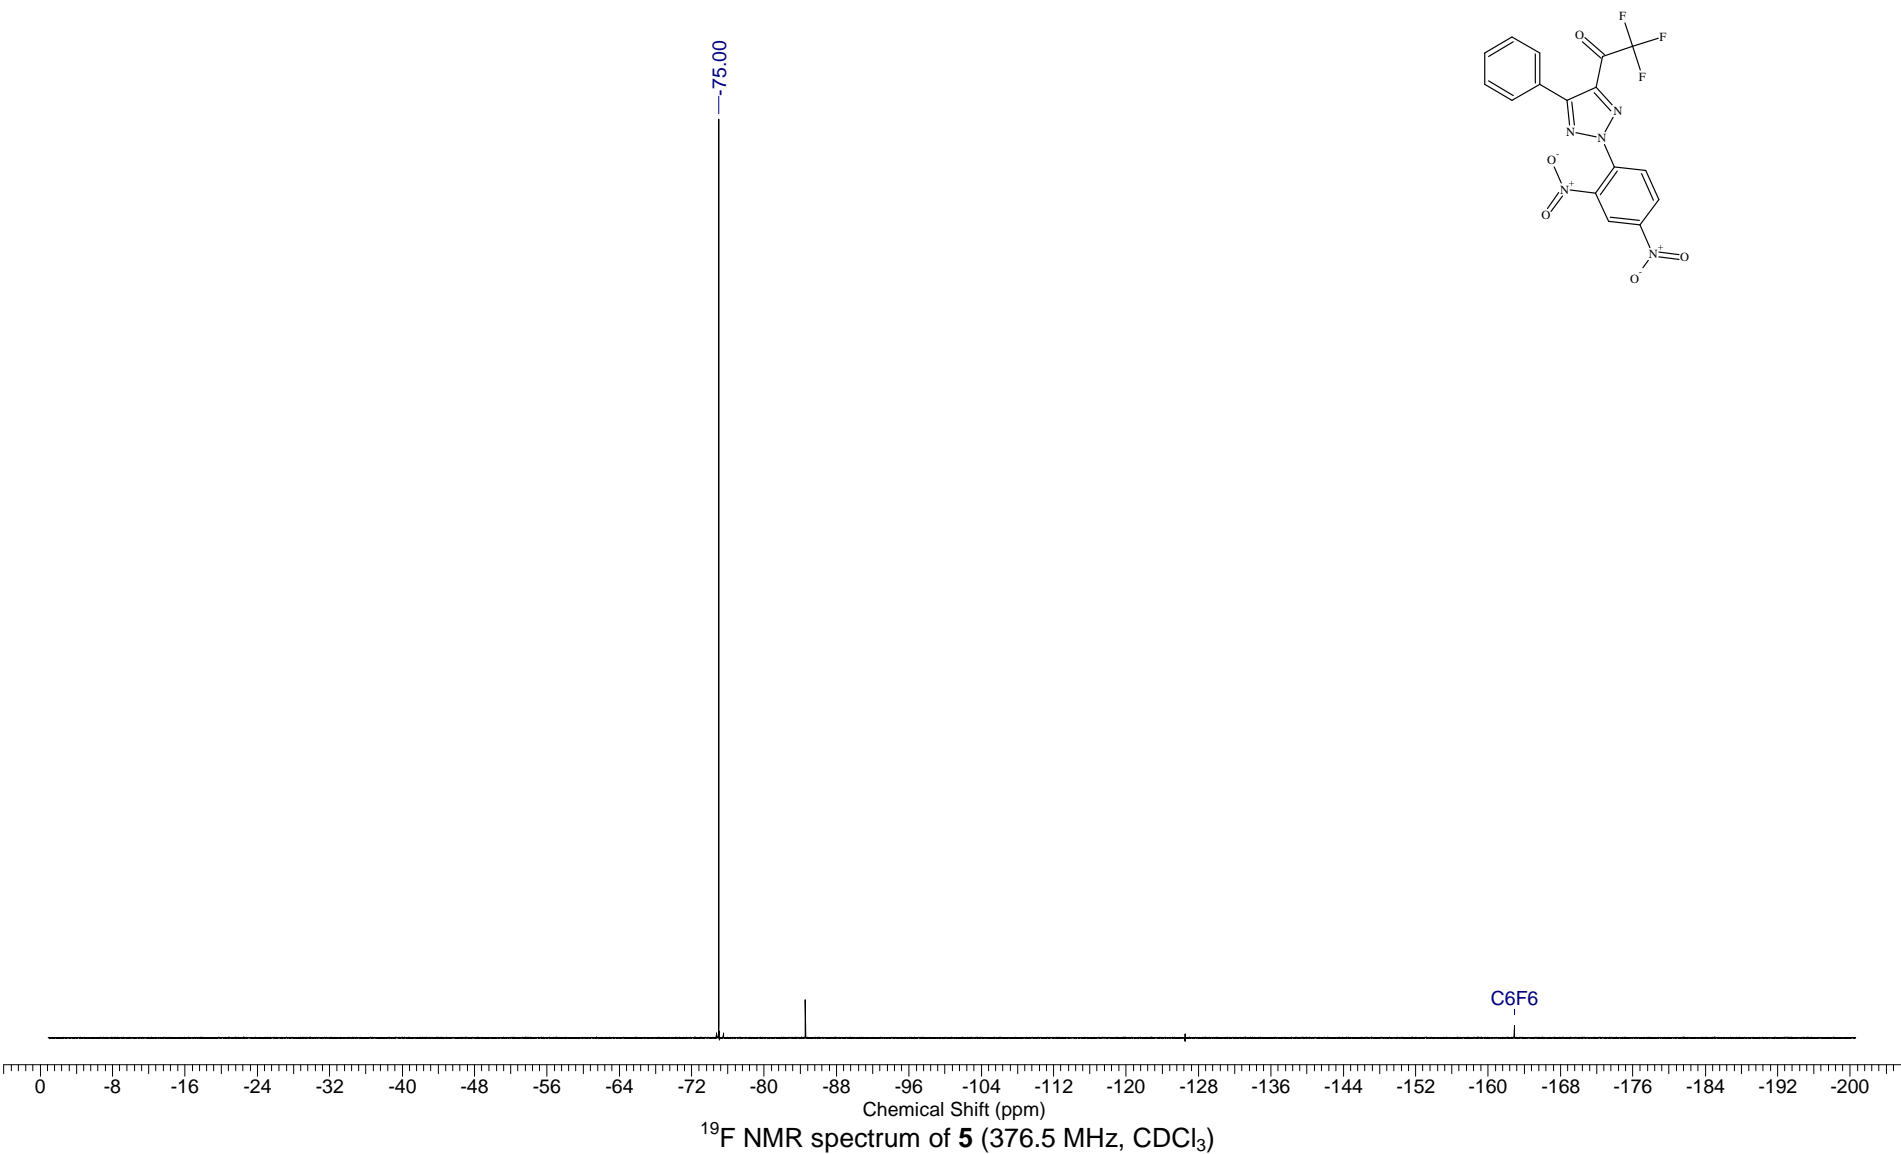

|                        |                                                      |                      |                      |                       |                 |                        |        |
|------------------------|------------------------------------------------------|----------------------|----------------------|-----------------------|-----------------|------------------------|--------|
| Acquisition Time (sec) | 0.6783                                               | Comment              | Imported from UXNMR. |                       | Date            | 22 Mar 2022 15:54:02   |        |
| File Name              | C:\DOCS\OUTPUT_301\2022\03.mapr\BM-2461-1p.C_002001r |                      |                      |                       | Frequency (MHz) | 100.61                 |        |
| Nucleus                | 13C                                                  | Number of Transients | 266                  | Original Points Count | 16384           | Points Count           | 131072 |
| Pulse Sequence         | zgpg30                                               | Solvent              | DMSO-D6              | Sweep Width (Hz)      | 24154.59        | Temperature (degree C) | 27.000 |

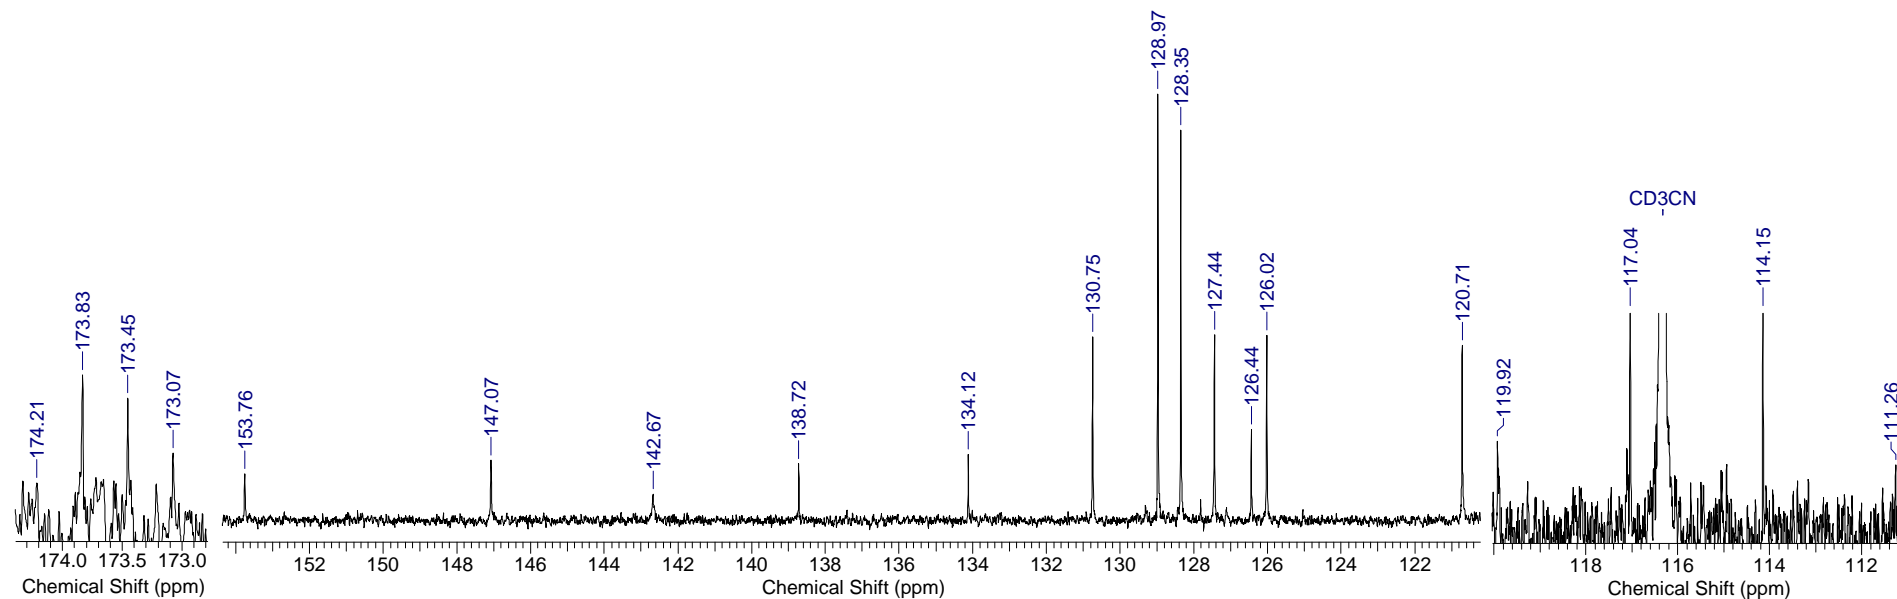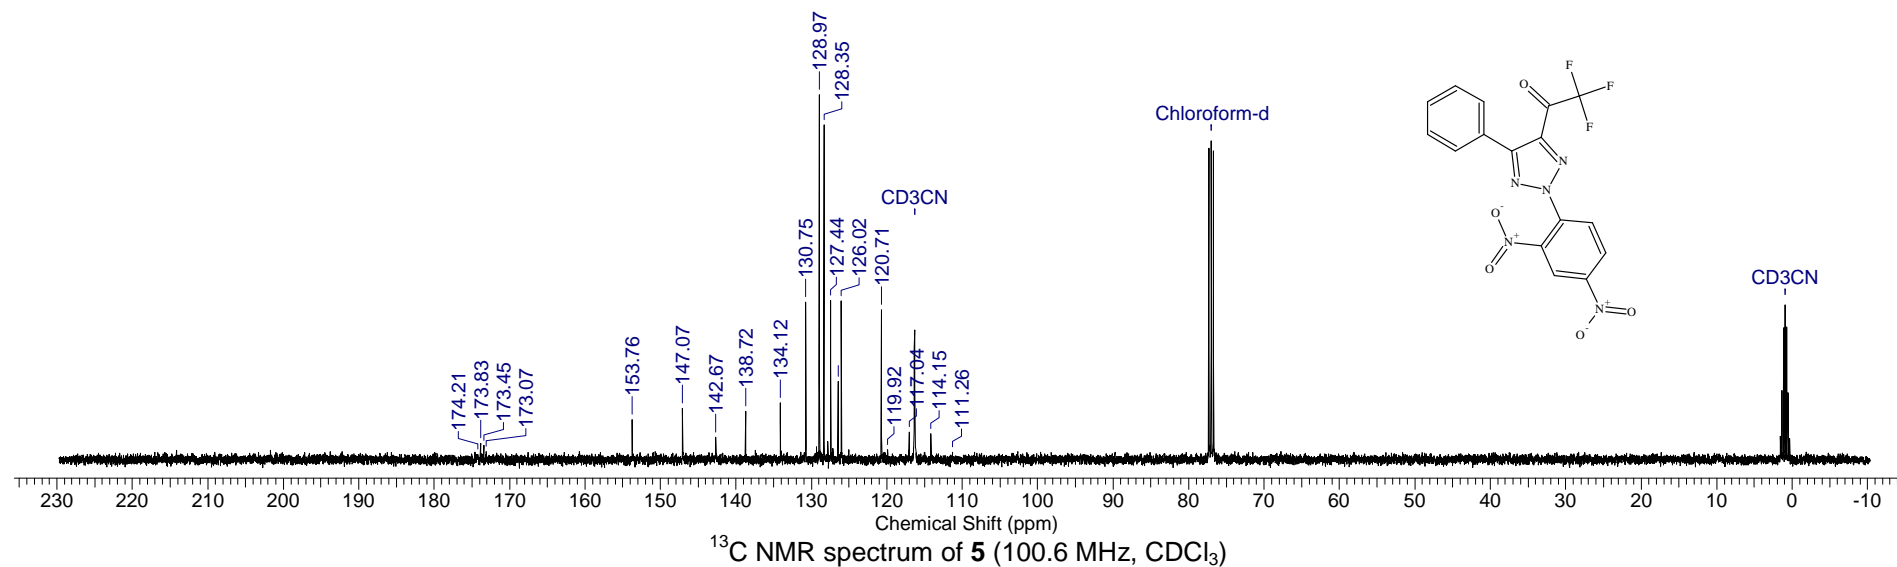

|                               |                                                          |                             |                      |                              |                      |
|-------------------------------|----------------------------------------------------------|-----------------------------|----------------------|------------------------------|----------------------|
| <b>Acquisition Time (sec)</b> | 4.0894                                                   | <b>Comment</b>              | Imported from UXNMR. | <b>Date</b>                  | 01 Nov 2022 14:16:34 |
| <b>File Name</b>              | C:\DOCS\OUTPUT_301\2022\11.ноябрь\SA-BM-2671-9.H_001001r |                             |                      | <b>Frequency (MHz)</b>       | 400.13               |
| <b>Nucleus</b>                | <sup>1</sup> H                                           | <b>Number of Transients</b> | 4                    | <b>Original Points Count</b> | 32768                |
| <b>Pulse Sequence</b>         | zg30                                                     | <b>Solvent</b>              | CHLOROFORM-D         | <b>Points Count</b>          | 131072               |
| <b>Temperature (degree C)</b> | 27.000                                                   |                             |                      | <b>Sweep Width (Hz)</b>      | 8012.82              |

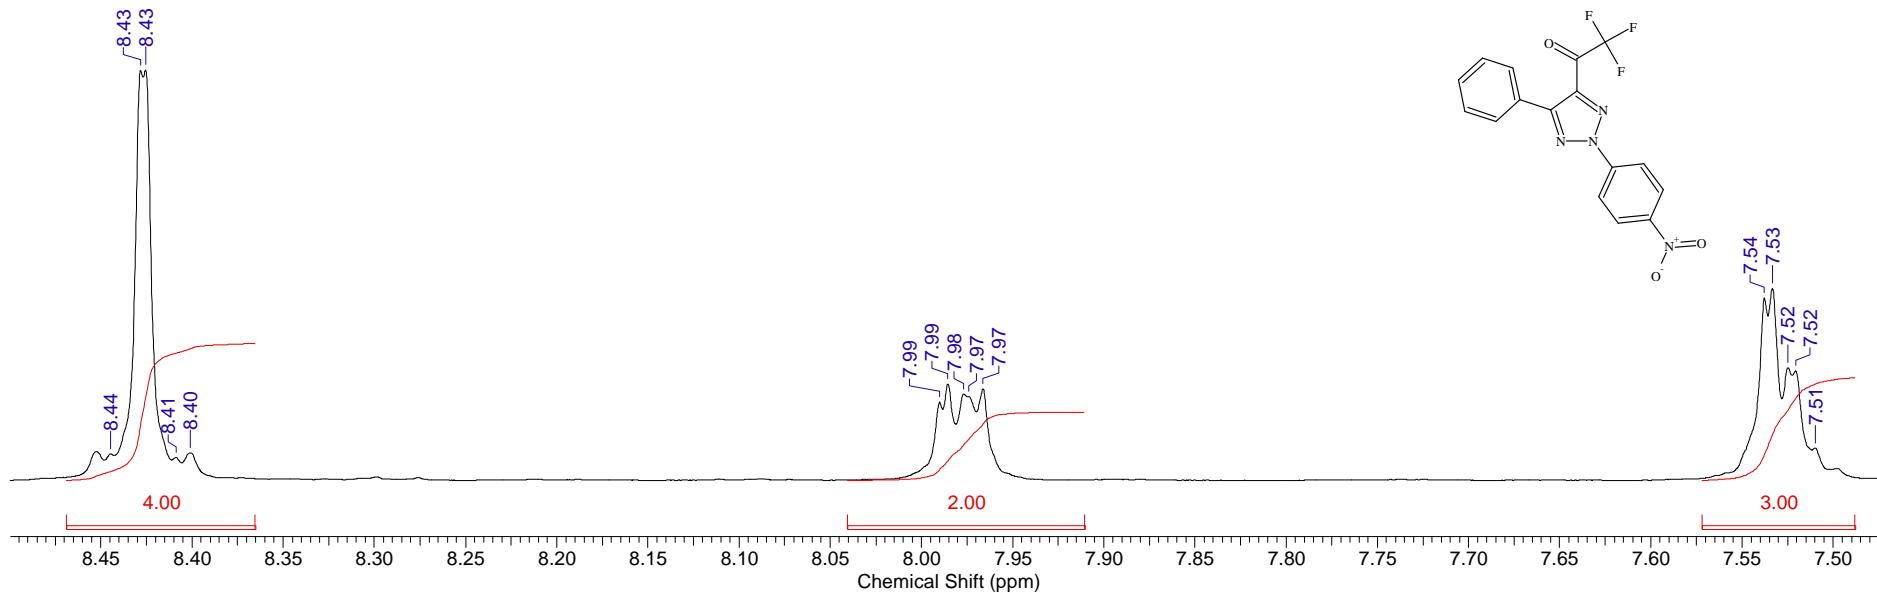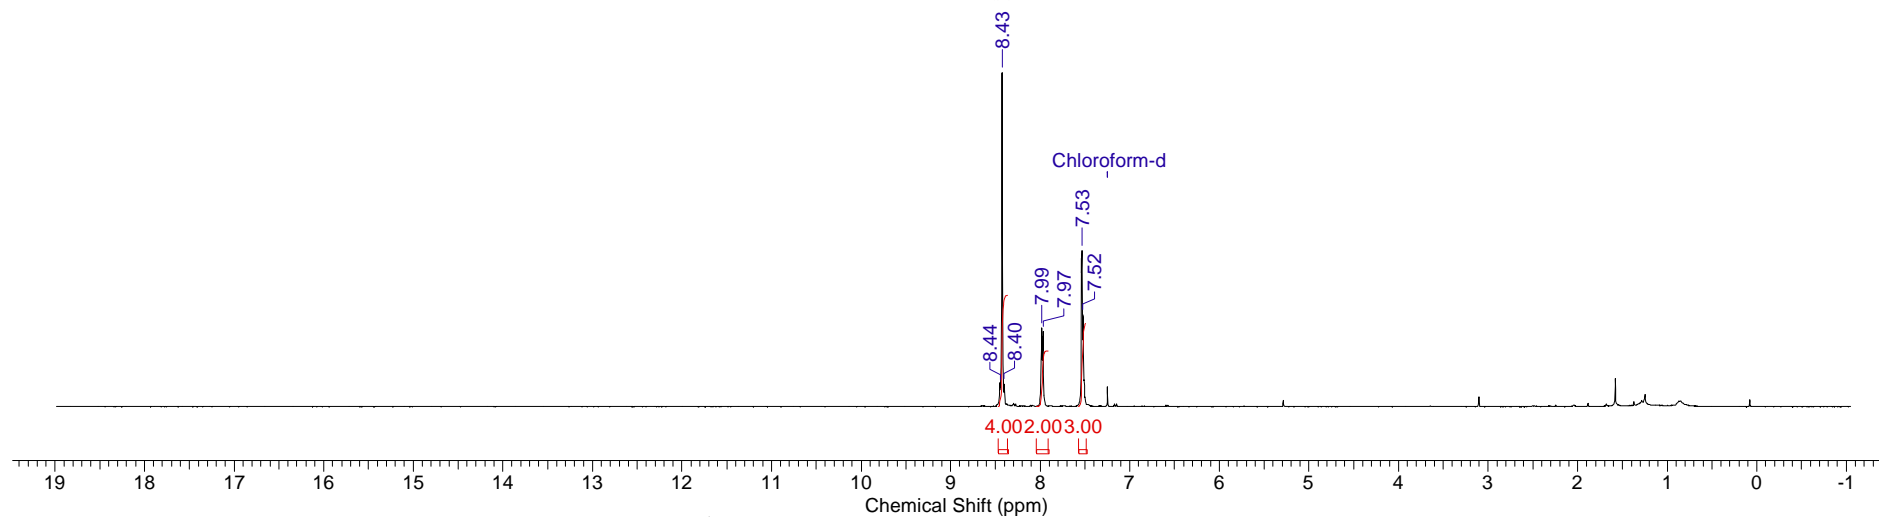<sup>1</sup>H NMR spectrum of **6** (400.1 MHz, CDCl<sub>3</sub>)

|                               |                                                          |                             |                      |                              |                         |                      |        |
|-------------------------------|----------------------------------------------------------|-----------------------------|----------------------|------------------------------|-------------------------|----------------------|--------|
| <b>Acquisition Time (sec)</b> | 1.7433                                                   | <b>Comment</b>              | Imported from UXNMR. |                              | <b>Date</b>             | 01 Nov 2022 15:46:26 |        |
| <b>File Name</b>              | C:\DOCS\OUTPUT_301\2022\11.ноябрь\SA-BM-2671-9.F_005001r |                             |                      |                              | <b>Frequency (MHz)</b>  | 376.50               |        |
| <b>Nucleus</b>                | 19F                                                      | <b>Number of Transients</b> | 16                   | <b>Original Points Count</b> | 131072                  | <b>Points Count</b>  | 262144 |
| <b>Pulse Sequence</b>         | zgfgn                                                    | <b>Solvent</b>              | ACETONITRILE-D3      |                              | <b>Sweep Width (Hz)</b> | 75187.97             |        |
| <b>Temperature (degree C)</b> | 27.000                                                   |                             |                      |                              |                         |                      |        |

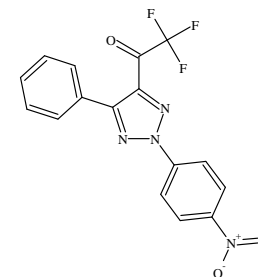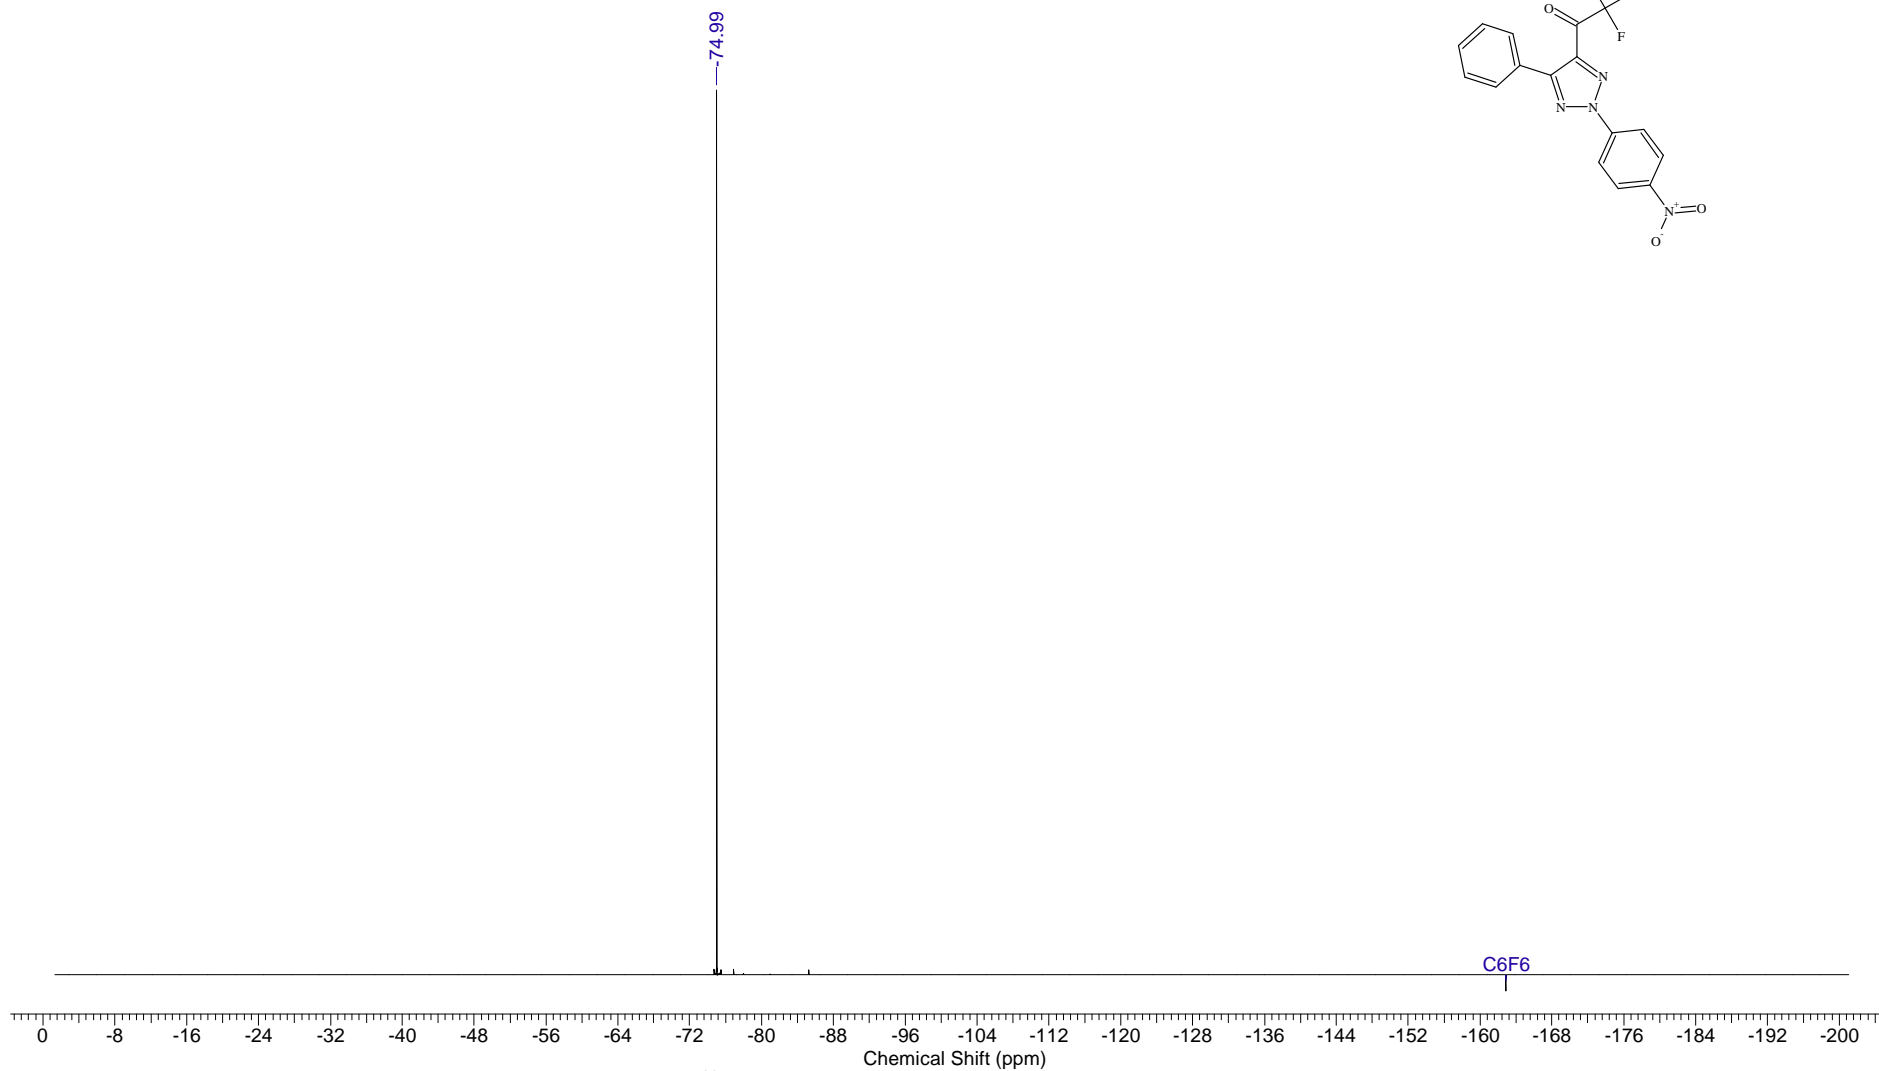

<sup>19</sup>F NMR spectrum of **6** (376.5 MHz, CDCl<sub>3</sub>)

|                        |                                                          |                      |                      |                       |                  |                      |        |
|------------------------|----------------------------------------------------------|----------------------|----------------------|-----------------------|------------------|----------------------|--------|
| Acquisition Time (sec) | 0.6783                                                   | Comment              | Imported from UXNMR. |                       | Date             | 01 Nov 2022 14:31:16 |        |
| File Name              | C:\DOCS\OUTPUT_301\2022\11.ноябрь\SA-BM-2671-9.C_002001r |                      |                      |                       | Frequency (MHz)  | 100.61               |        |
| Nucleus                | 13C                                                      | Number of Transients | 305                  | Original Points Count | 16384            | Points Count         | 131072 |
| Pulse Sequence         | zgpg30                                                   | Solvent              | CHLOROFORM-D         |                       | Sweep Width (Hz) | 24154.59             |        |
| Temperature (degree C) | 27.000                                                   |                      |                      |                       |                  |                      |        |

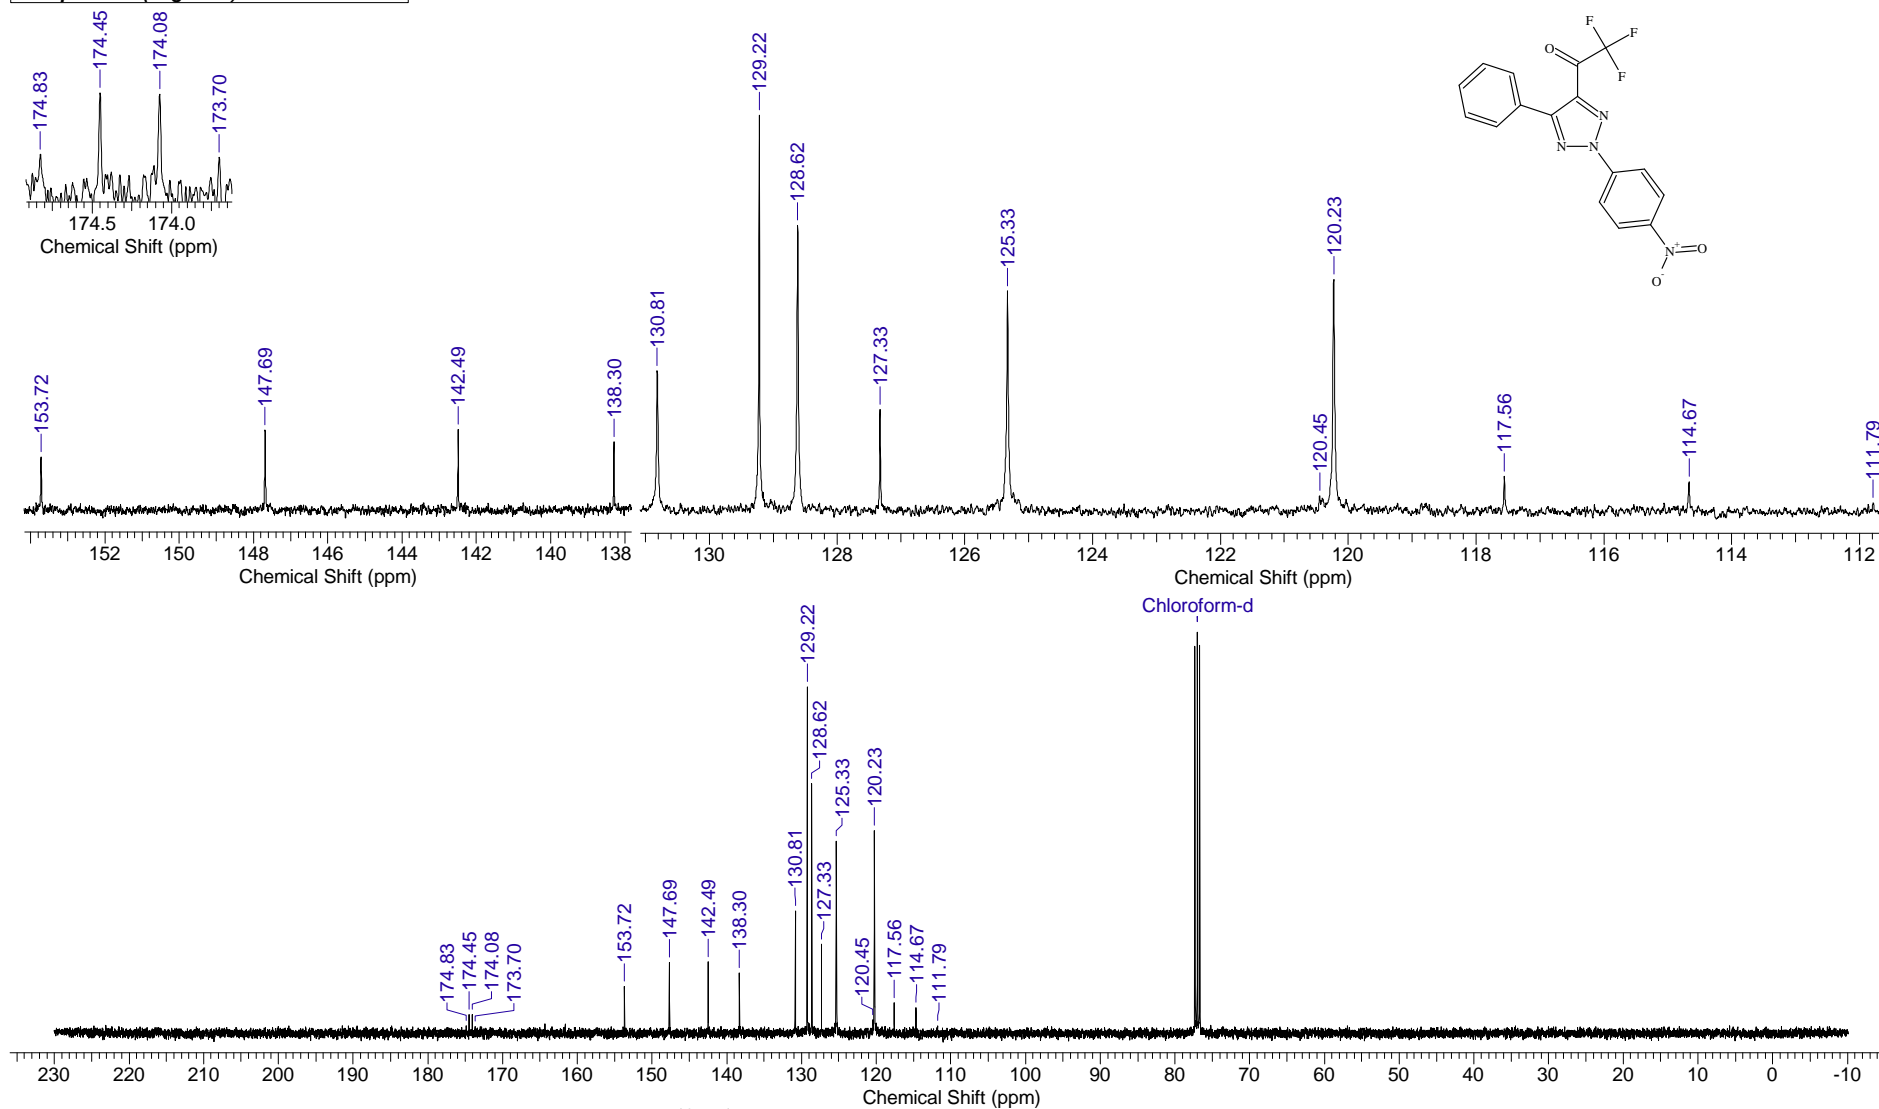<sup>13</sup>C{<sup>1</sup>H} NMR spectrum of **6** (100.6 MHz, CDCl<sub>3</sub>)

|                        |                                                           |                      |                      |                       |                      |
|------------------------|-----------------------------------------------------------|----------------------|----------------------|-----------------------|----------------------|
| Acquisition Time (sec) | 4.0894                                                    | Comment              | Imported from UXNMR. | Date                  | 08 Apr 2022 15:46:58 |
| File Name              | C:\DOCS\OUTPUT_301\2022\04.апрель\SZA-BM-2488-7.H_001001r |                      |                      | Frequency (MHz)       | 400.13               |
| Nucleus                | 1H                                                        | Number of Transients | 4                    | Original Points Count | 32768                |
| Pulse Sequence         | zg30                                                      | Solvent              | CHLOROFORM-D         | Points Count          | 131072               |
| Temperature (degree C) | 27.000                                                    |                      |                      | Sweep Width (Hz)      | 8012.82              |

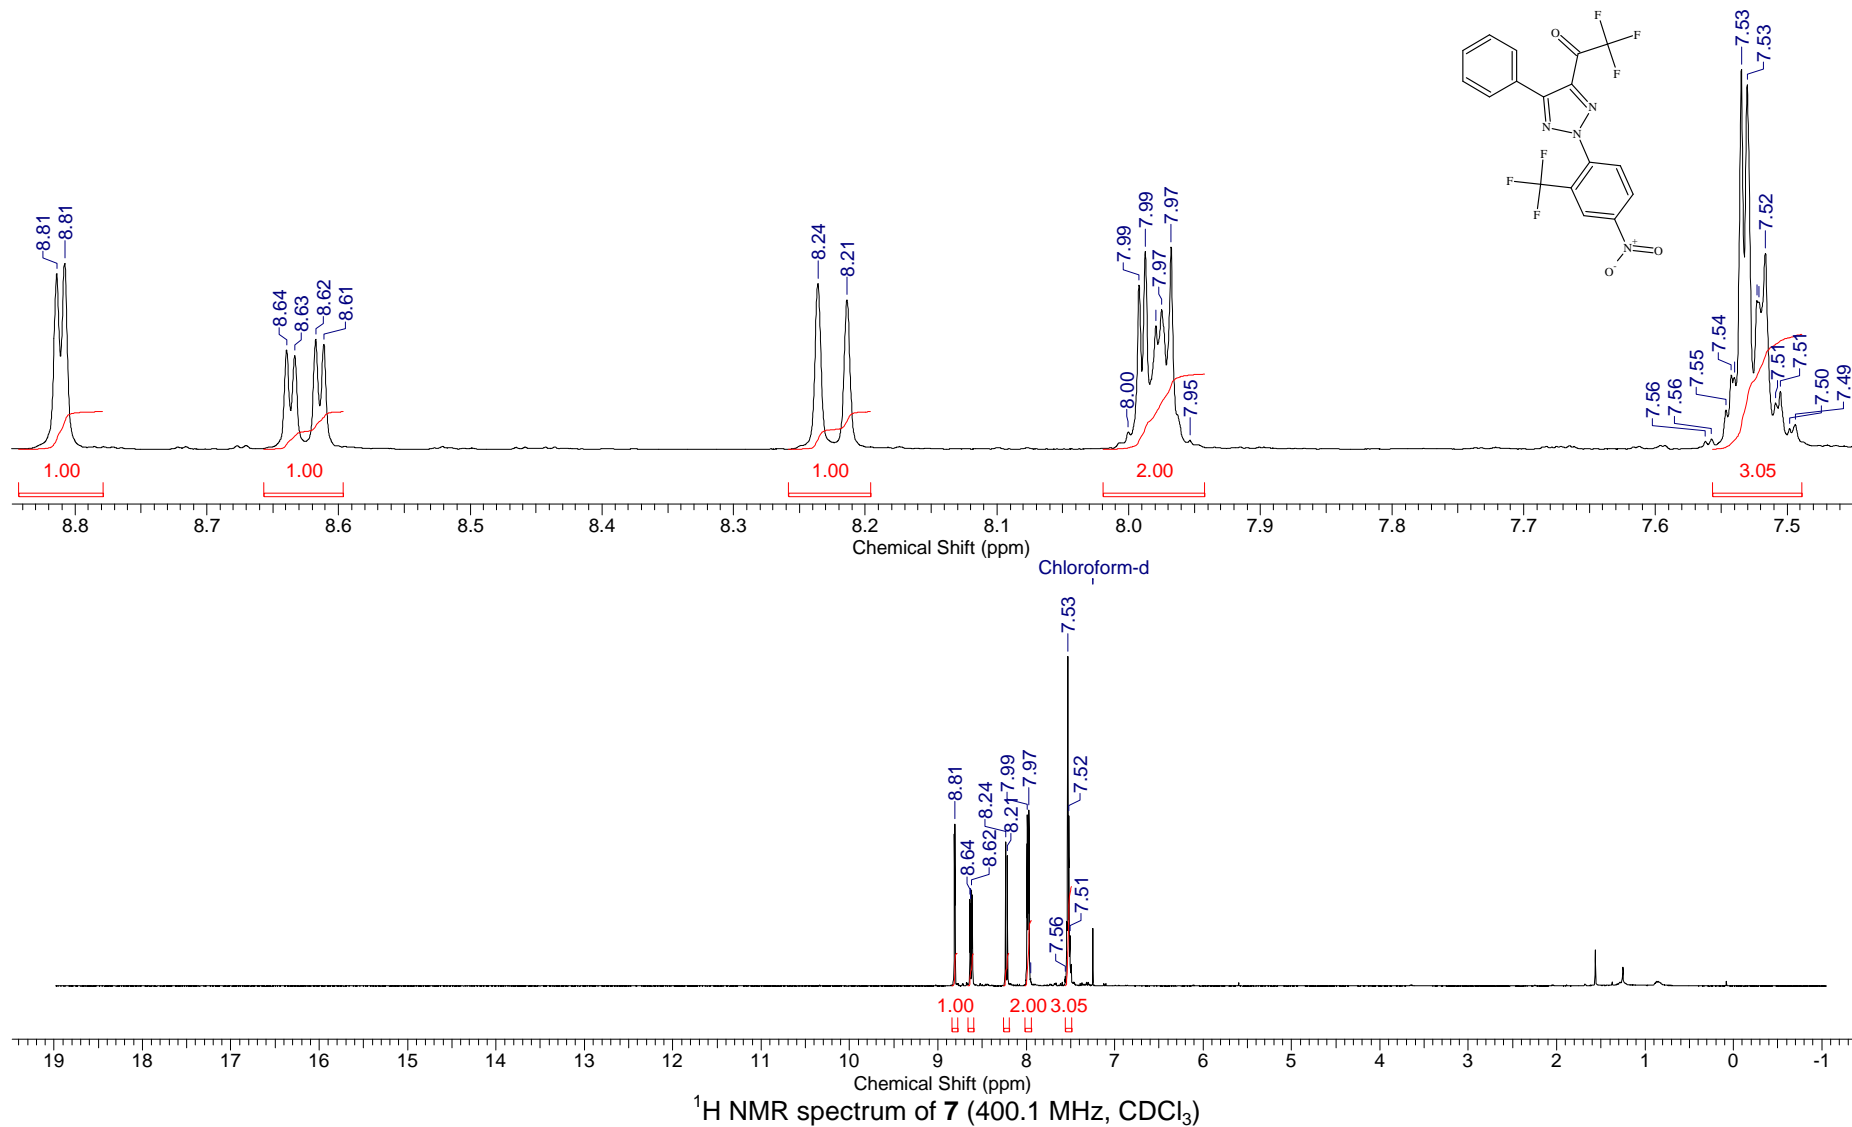

|                               |                                                          |                             |                      |                              |                      |
|-------------------------------|----------------------------------------------------------|-----------------------------|----------------------|------------------------------|----------------------|
| <b>Acquisition Time (sec)</b> | 1.7433                                                   | <b>Comment</b>              | Imported from UXNMR. | <b>Date</b>                  | 08 Apr 2022 15:45:36 |
| <b>File Name</b>              | C:\DOCS\OUTPUT_301\2022\04.апрель\SA-BM-2488-7.F_005001r | <b>Frequency (MHz)</b>      | 376.50               | <b>Points Count</b>          | 262144               |
| <b>Nucleus</b>                | <sup>19</sup> F                                          | <b>Number of Transients</b> | 10                   | <b>Original Points Count</b> | 131072               |
| <b>Pulse Sequence</b>         | zgfgqn                                                   | <b>Solvent</b>              | CHLOROFORM-D         | <b>Sweep Width (Hz)</b>      | 75187.97             |
| <b>Temperature (degree C)</b> | 27.000                                                   |                             |                      |                              |                      |

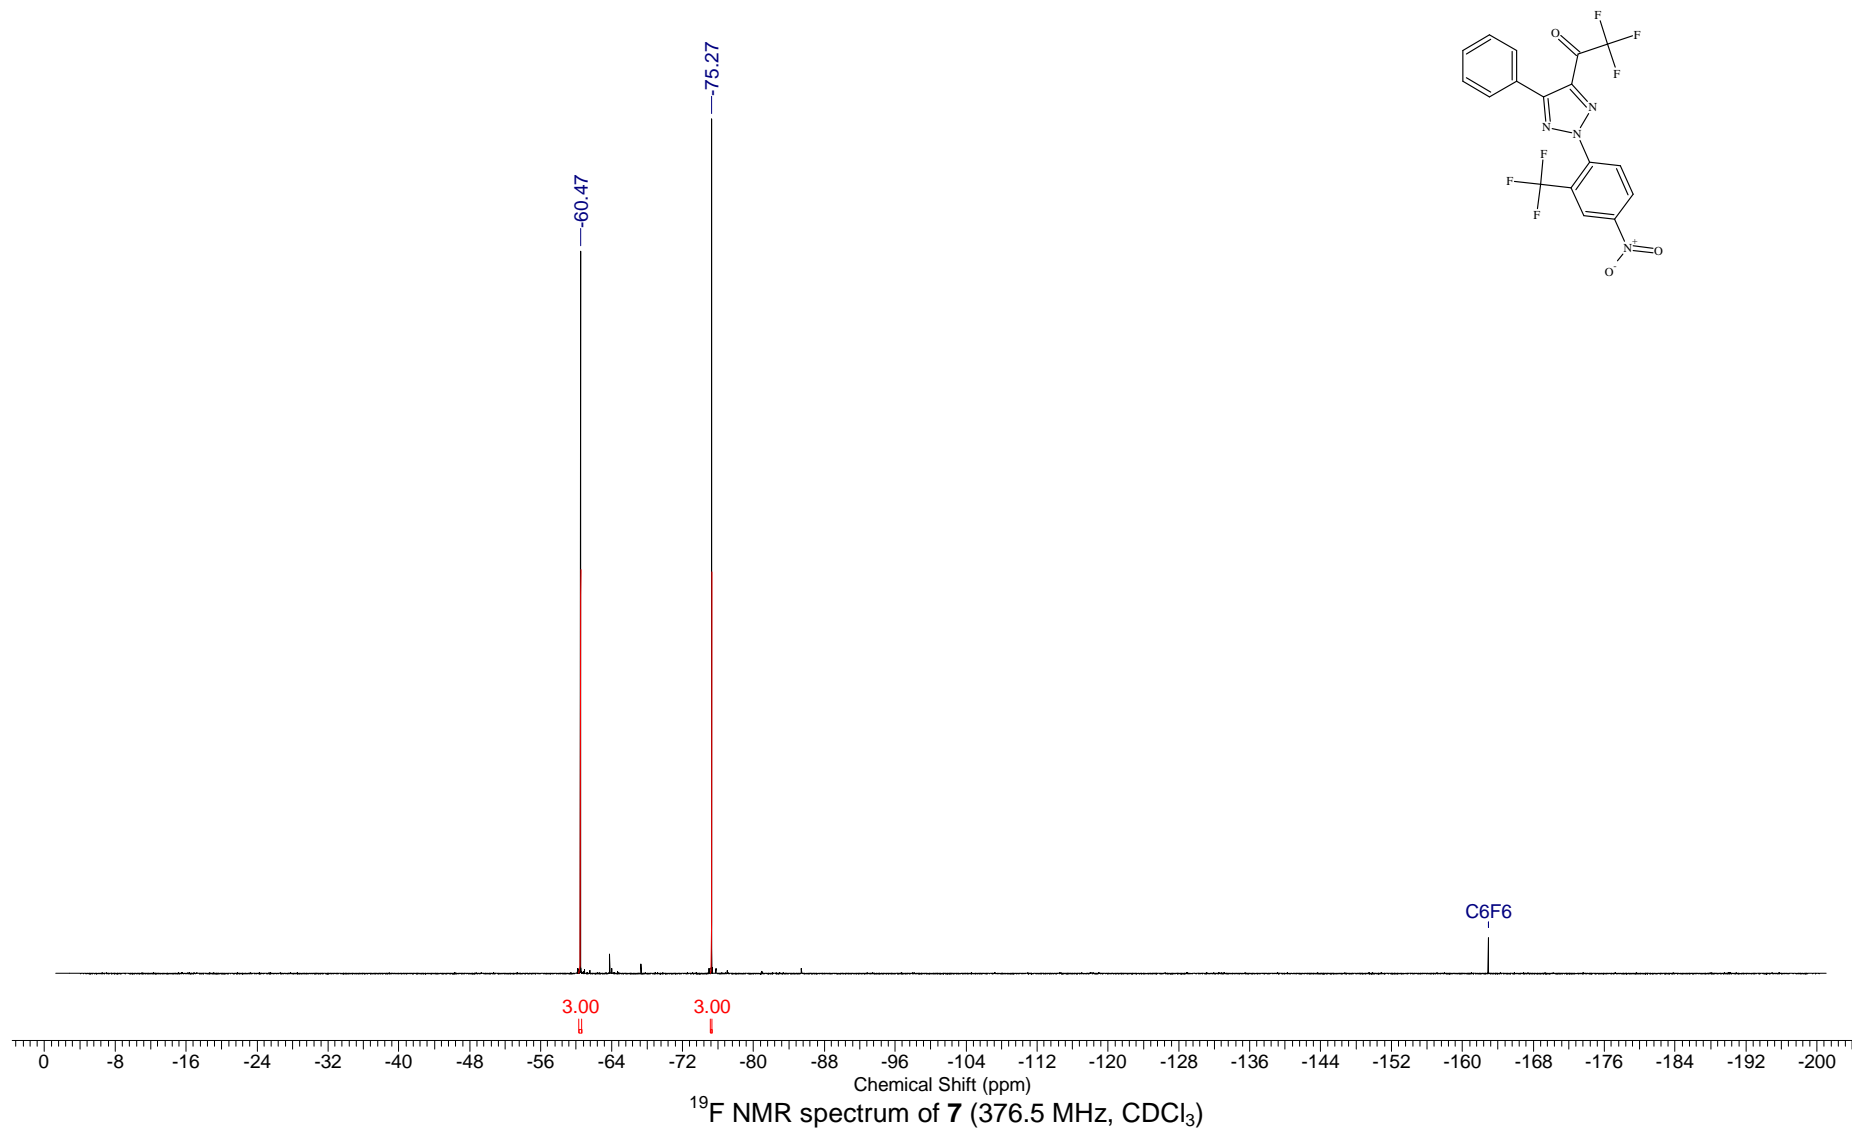



|                        |                                                           |                      |                      |                       |                  |                      |        |
|------------------------|-----------------------------------------------------------|----------------------|----------------------|-----------------------|------------------|----------------------|--------|
| Acquisition Time (sec) | 0.6783                                                    | Comment              | Imported from UXMNR. |                       | Date             | 08 Apr 2022 15:54:04 |        |
| File Name              | C:\DOCS\OUTPUT_301\2022\04.апрель\SZA-BM-2488-7.C_002001r |                      |                      |                       | Frequency (MHz)  | 100.61               |        |
| Nucleus                | 13C                                                       | Number of Transients | 123                  | Original Points Count | 16384            | Points Count         | 131072 |
| Pulse Sequence         | zgpg30                                                    | Solvent              | CHLOROFORM-D         |                       | Sweep Width (Hz) | 24154.59             |        |
| Temperature (degree C) | 27.000                                                    |                      |                      |                       |                  |                      | F      |

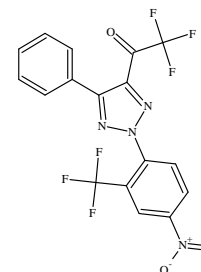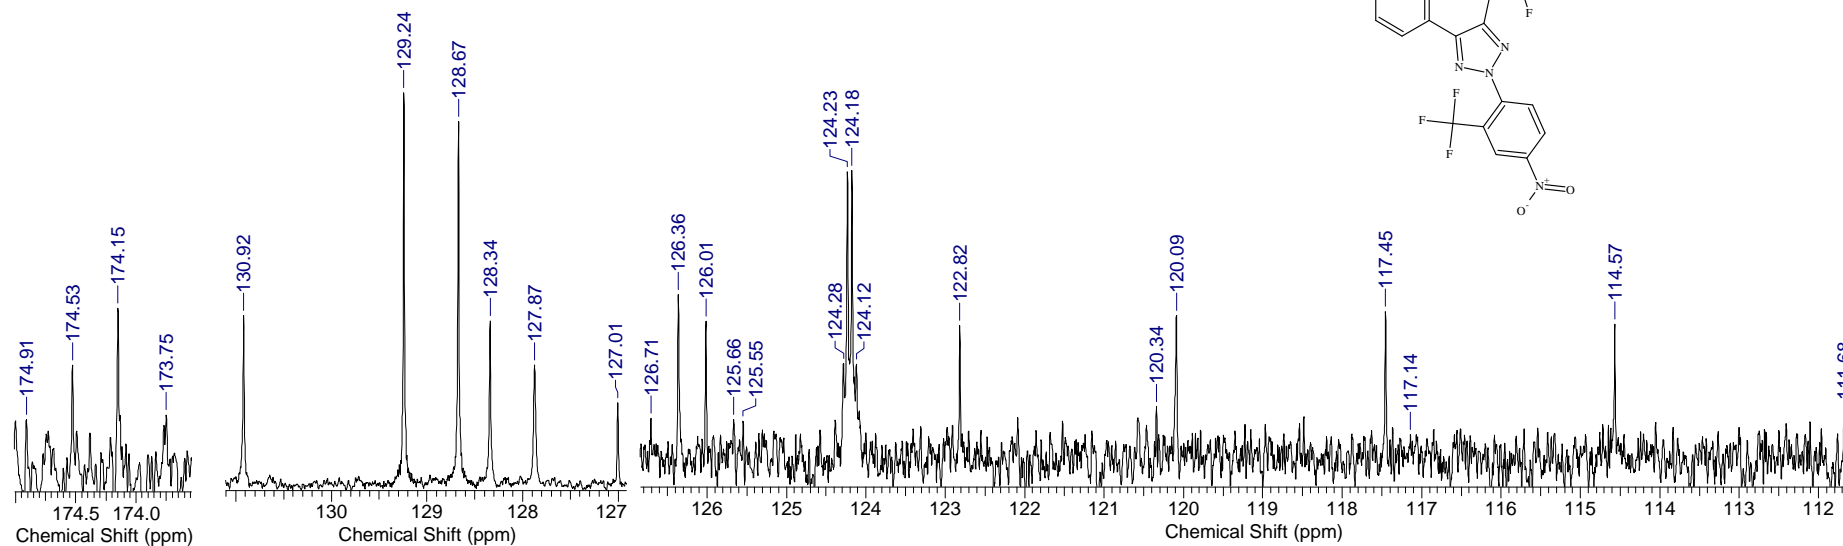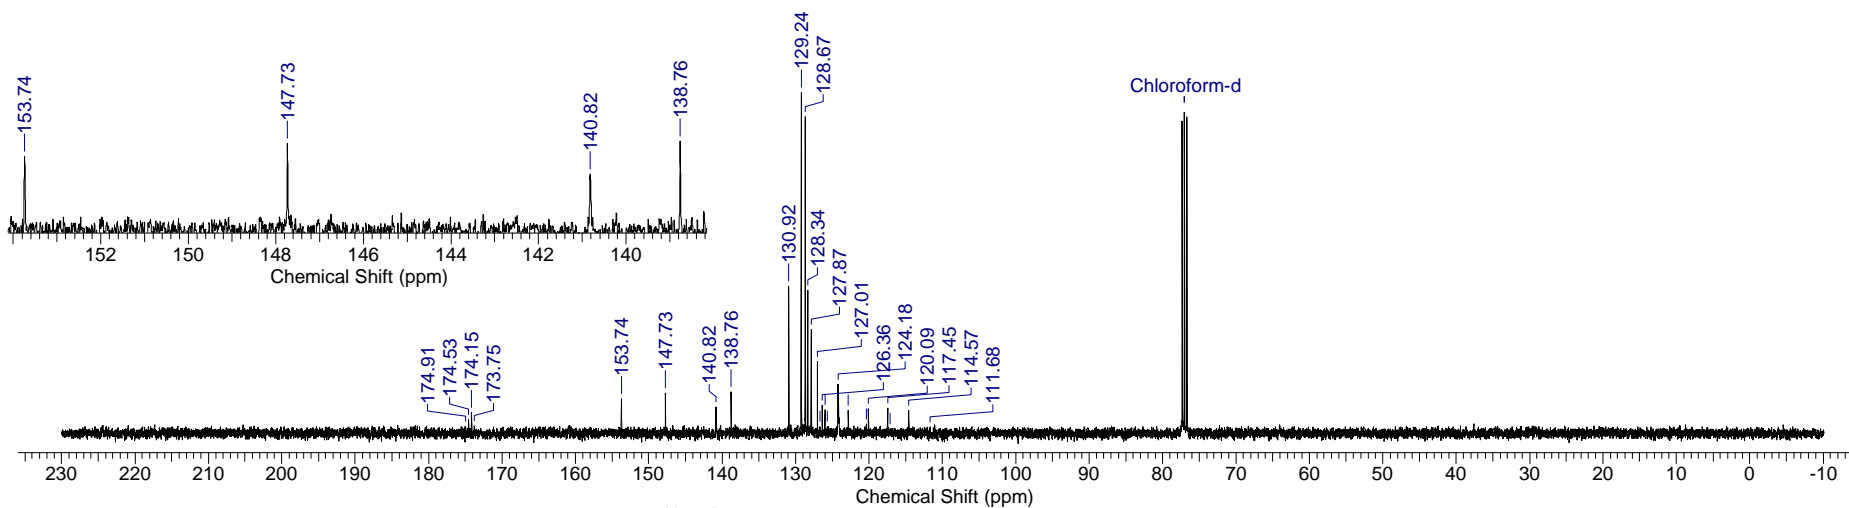

$^{13}\text{C}\{^1\text{H}\}$  NMR spectrum of **7** (100.6 MHz,  $\text{CDCl}_3$ )

|                               |                                                           |                             |                      |                              |                         |                      |        |
|-------------------------------|-----------------------------------------------------------|-----------------------------|----------------------|------------------------------|-------------------------|----------------------|--------|
| <b>Acquisition Time (sec)</b> | 4.0894                                                    | <b>Comment</b>              | Imported from UXNMR. |                              | <b>Date</b>             | 13 Apr 2022 17:07:34 |        |
| <b>File Name</b>              | C:\DOCS\OUTPUT_301\2022\04.апрель\SZA-BM-2492-5.H_001001r |                             |                      |                              | <b>Frequency (MHz)</b>  | 400.13               |        |
| <b>Nucleus</b>                | 1H                                                        | <b>Number of Transients</b> | 4                    | <b>Original Points Count</b> | 32768                   | <b>Points Count</b>  | 131072 |
| <b>Pulse Sequence</b>         | zg30                                                      | <b>Solvent</b>              | CHLOROFORM-D         |                              | <b>Sweep Width (Hz)</b> | 8012.82              |        |
| <b>Temperature (degree C)</b> | 27.000                                                    |                             |                      |                              |                         |                      |        |

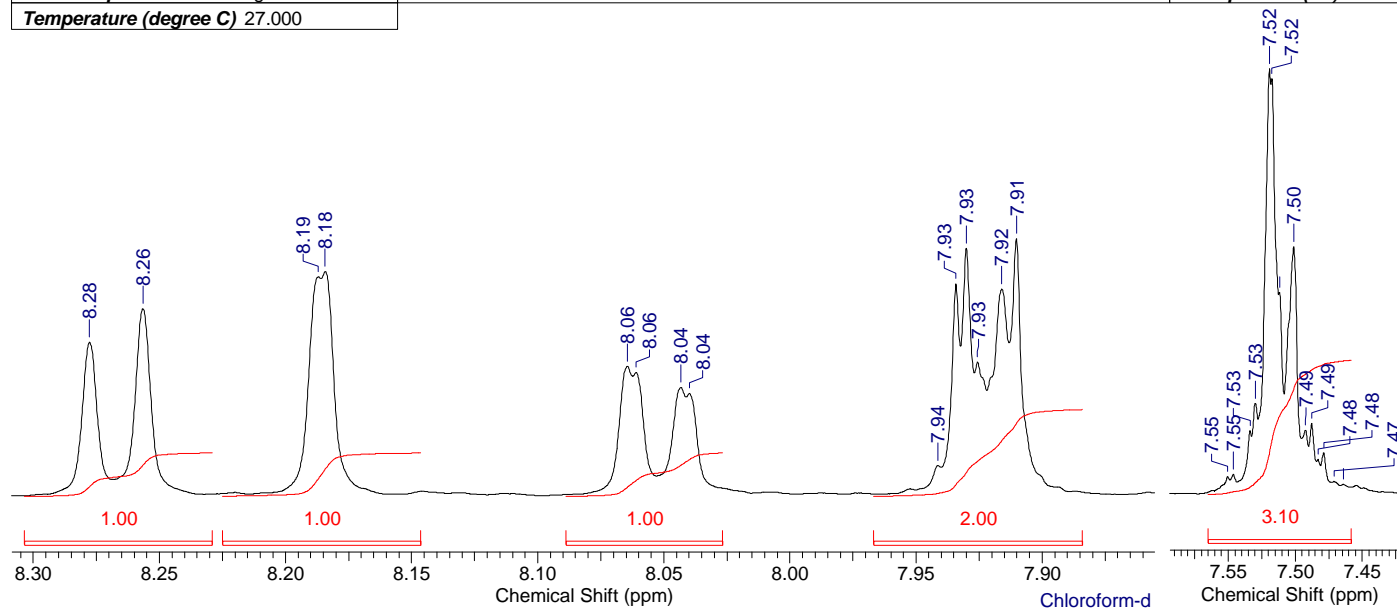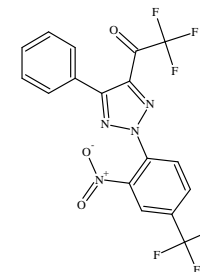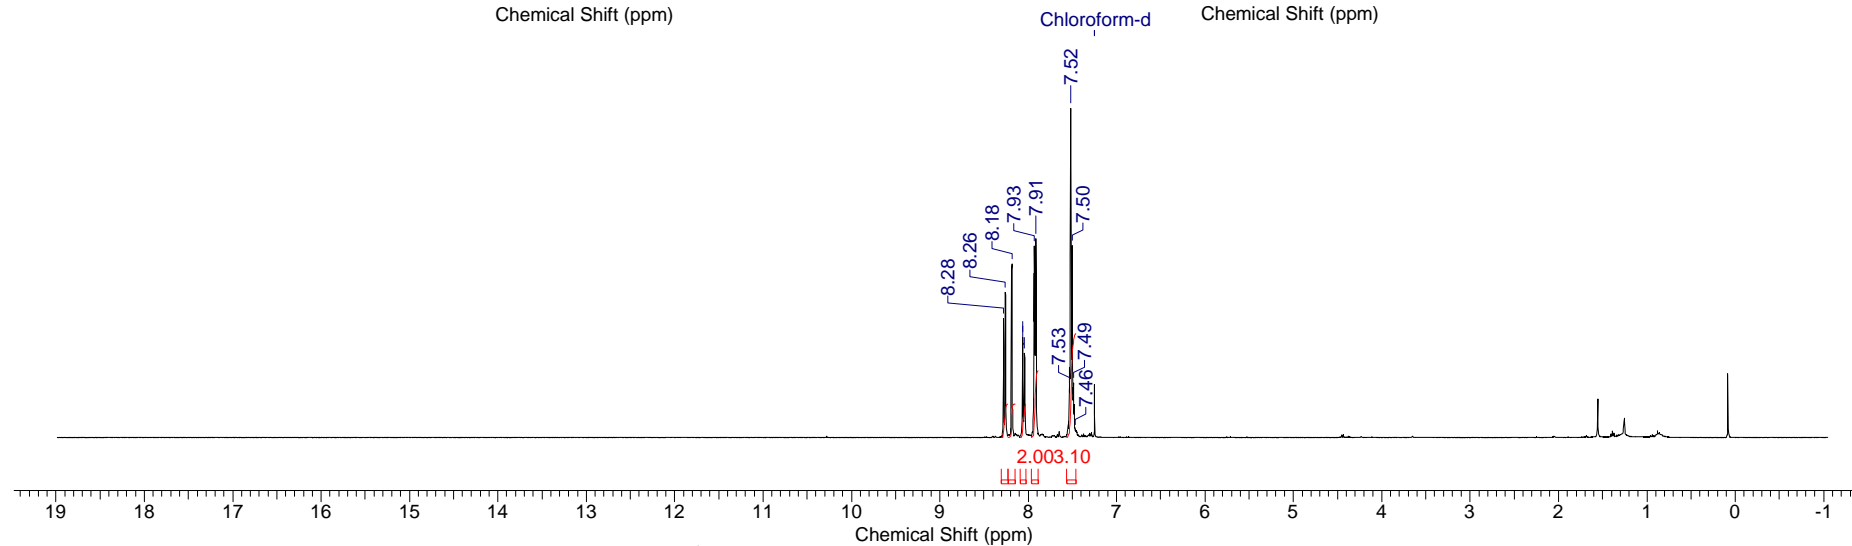

<sup>1</sup>H NMR spectrum of **8** (400.1 MHz, CDCl<sub>3</sub>)

|                        |                                                           |                      |                      |                       |        |                  |                      |
|------------------------|-----------------------------------------------------------|----------------------|----------------------|-----------------------|--------|------------------|----------------------|
| Acquisition Time (sec) | 1.7433                                                    | Comment              | Imported from UXNMR. |                       |        | Date             | 13 Apr 2022 17:11:06 |
| File Name              | C:\DOCS\OUTPUT_301\2022\04.апрель\SZA-BM-2492-5.F_005001r |                      |                      |                       |        | Frequency (MHz)  | 376.50               |
| Nucleus                | 19F                                                       | Number of Transients | 16                   | Original Points Count | 131072 | Points Count     | 262144               |
| Pulse Sequence         | zgfgqn                                                    | Solvent              | CHLOROFORM-D         |                       |        | Sweep Width (Hz) | 75187.97             |
| Temperature (degree C) | 27.000                                                    |                      |                      |                       |        |                  |                      |

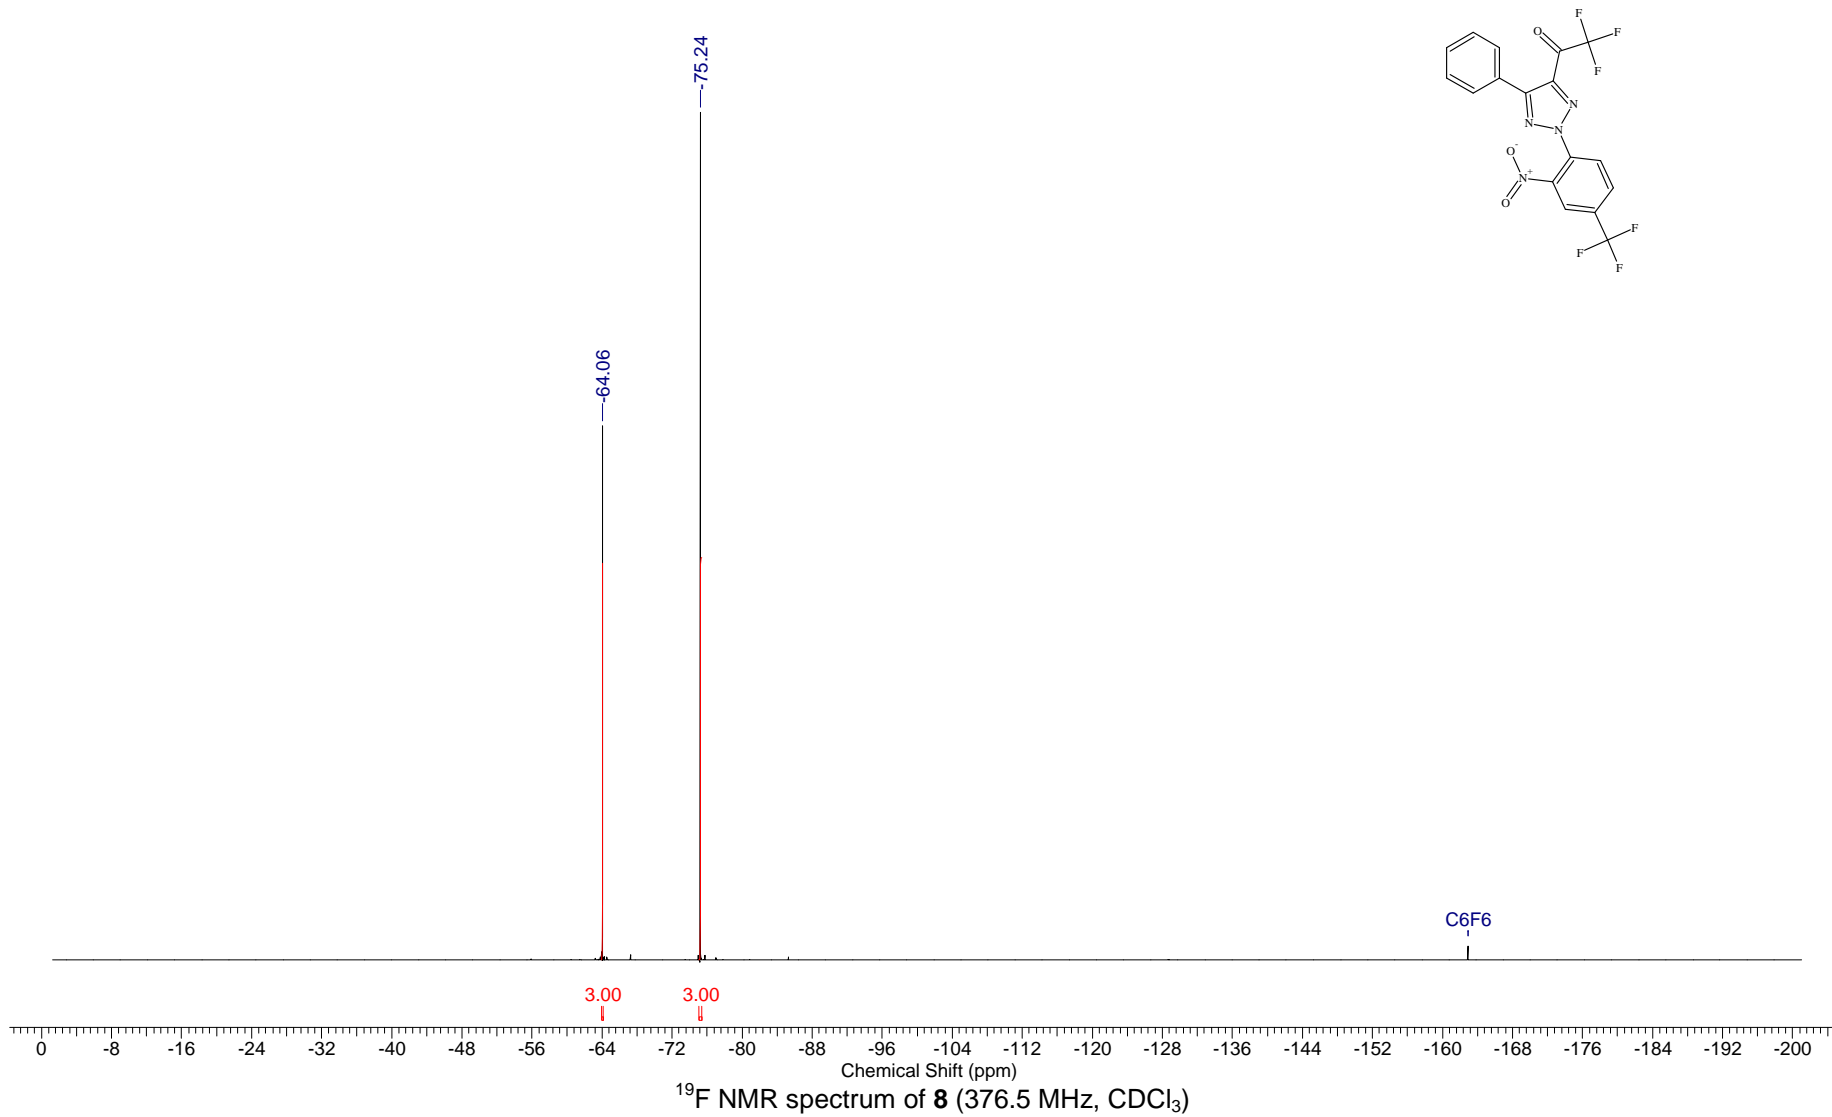

|                        |                                                          |                      |                      |                       |                  |                      |        |
|------------------------|----------------------------------------------------------|----------------------|----------------------|-----------------------|------------------|----------------------|--------|
| Acquisition Time (sec) | 0.6783                                                   | Comment              | Imported from UXNMR. |                       | Date             | 14 Apr 2022 12:08:54 |        |
| File Name              | C:\DOCS\OUTPUT_301\2022\04.апрель\SA-BM-2492-5.C_002001r |                      |                      |                       | Frequency (MHz)  | 100.61               |        |
| Nucleus                | 13C                                                      | Number of Transients | 298                  | Original Points Count | 16384            | Points Count         | 131072 |
| Pulse Sequence         | zgpg30                                                   | Solvent              | CHLOROFORM-D         |                       | Sweep Width (Hz) | 24154.59             |        |
| Temperature (degree C) | 27.000                                                   |                      |                      |                       |                  |                      |        |

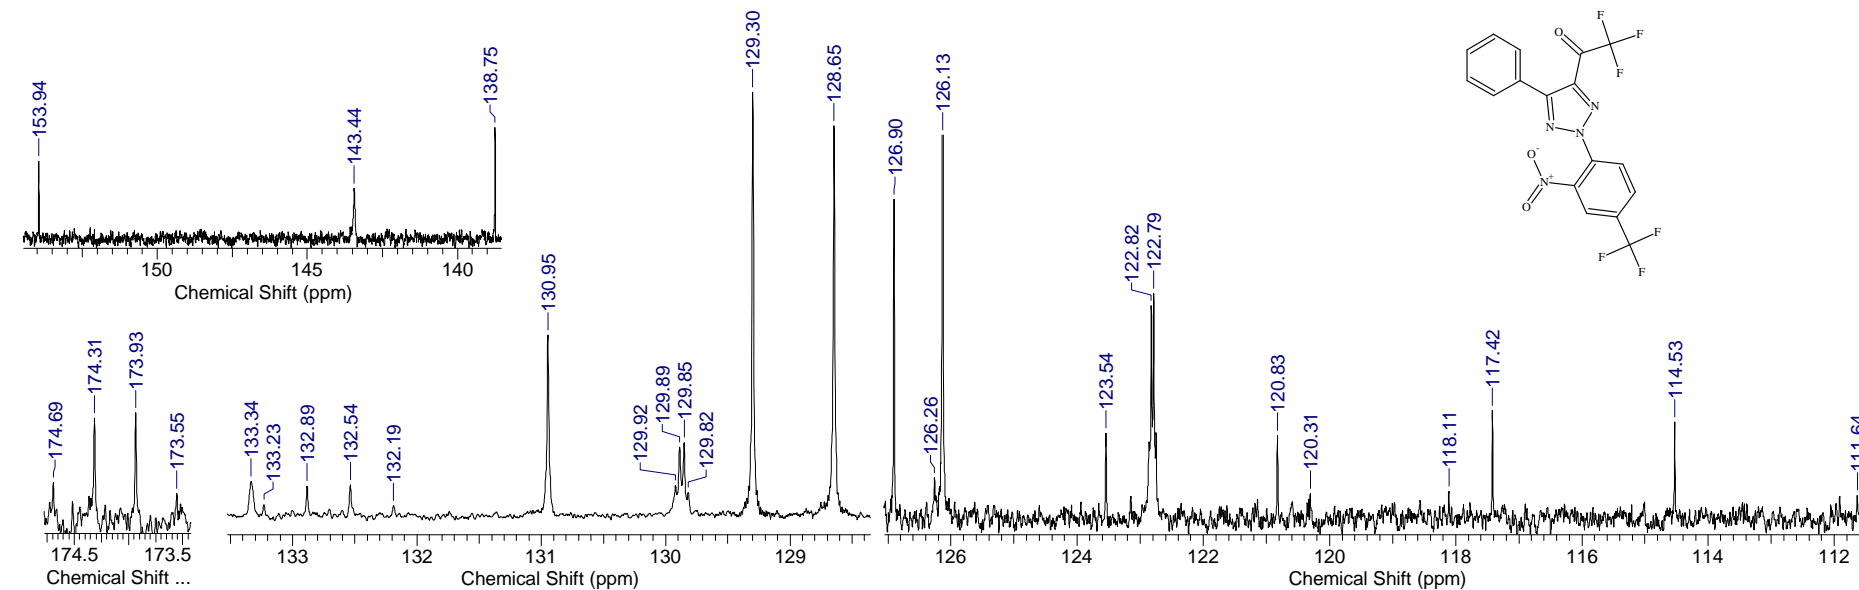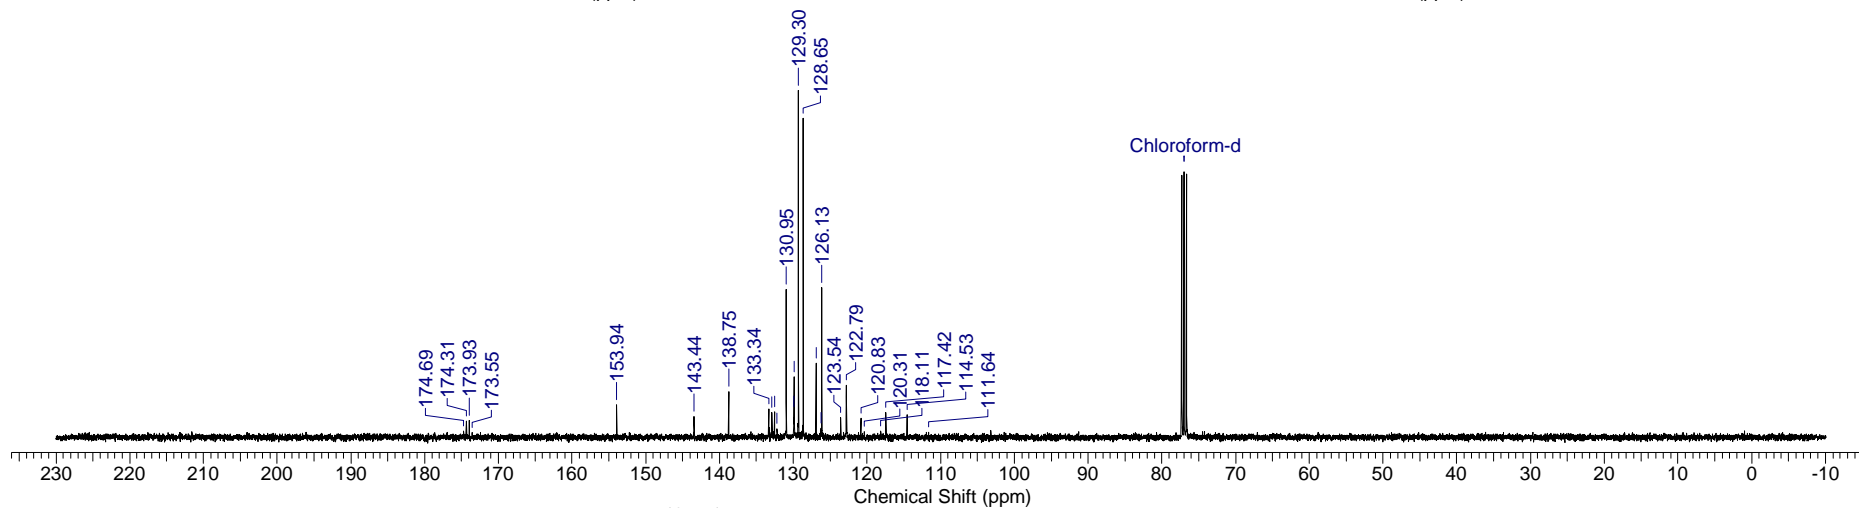<sup>13</sup>C{<sup>1</sup>H} NMR spectrum of **8** (100.6 MHz, CDCl<sub>3</sub>)

|                               |                                                       |                             |                      |                              |                         |                      |        |
|-------------------------------|-------------------------------------------------------|-----------------------------|----------------------|------------------------------|-------------------------|----------------------|--------|
| <b>Acquisition Time (sec)</b> | 4.0894                                                | <b>Comment</b>              | Imported from UXNMR. |                              | <b>Date</b>             | 18 Apr 2022 15:15:14 |        |
| <b>File Name</b>              | C:\DOCS\OUTPUT_301\2022\04.апрель\BM-2501-2.H_001001r |                             |                      |                              | <b>Frequency (MHz)</b>  | 400.13               |        |
| <b>Nucleus</b>                | 1H                                                    | <b>Number of Transients</b> | 4                    | <b>Original Points Count</b> | 32768                   | <b>Points Count</b>  | 131072 |
| <b>Pulse Sequence</b>         | zg30                                                  | <b>Solvent</b>              | CHLOROFORM-D         |                              | <b>Sweep Width (Hz)</b> | 8012.82              |        |
| <b>Temperature (degree C)</b> | 27.000                                                |                             |                      |                              |                         |                      |        |

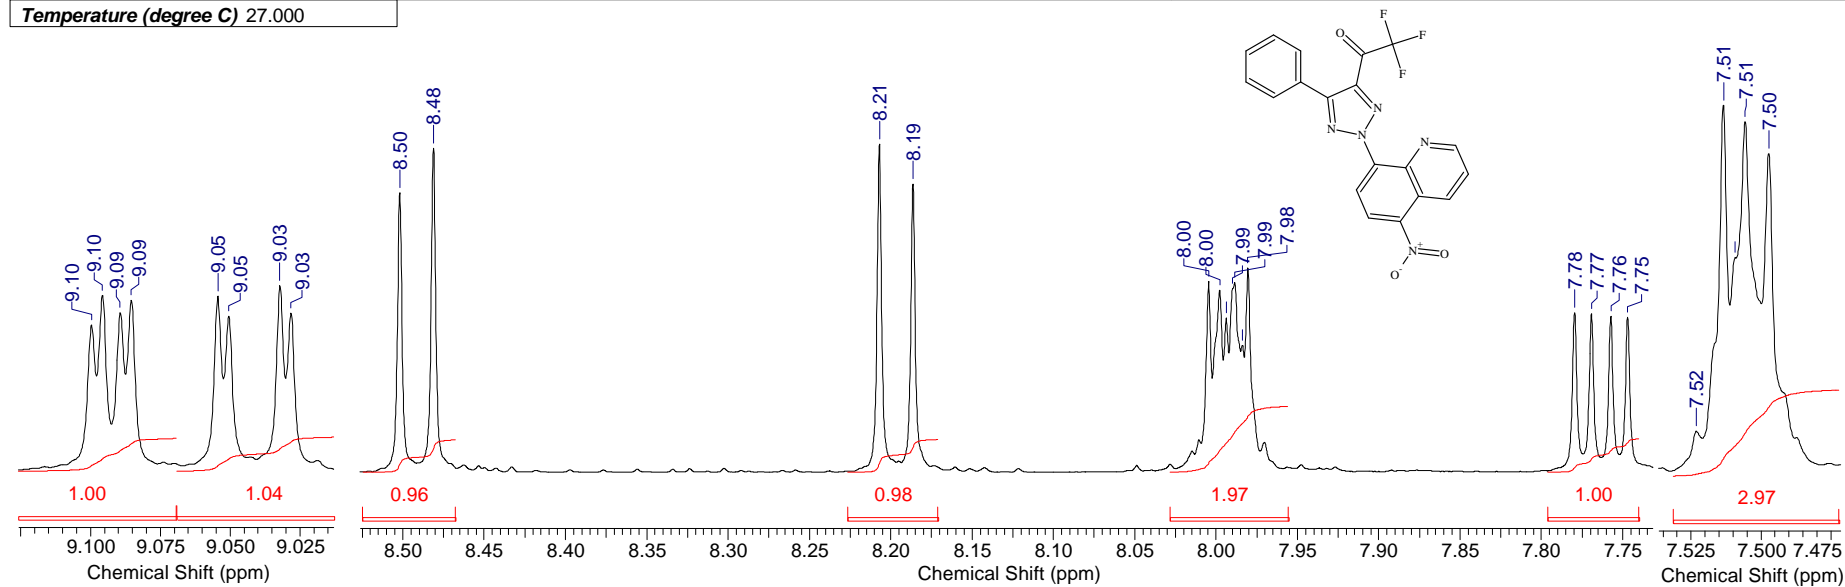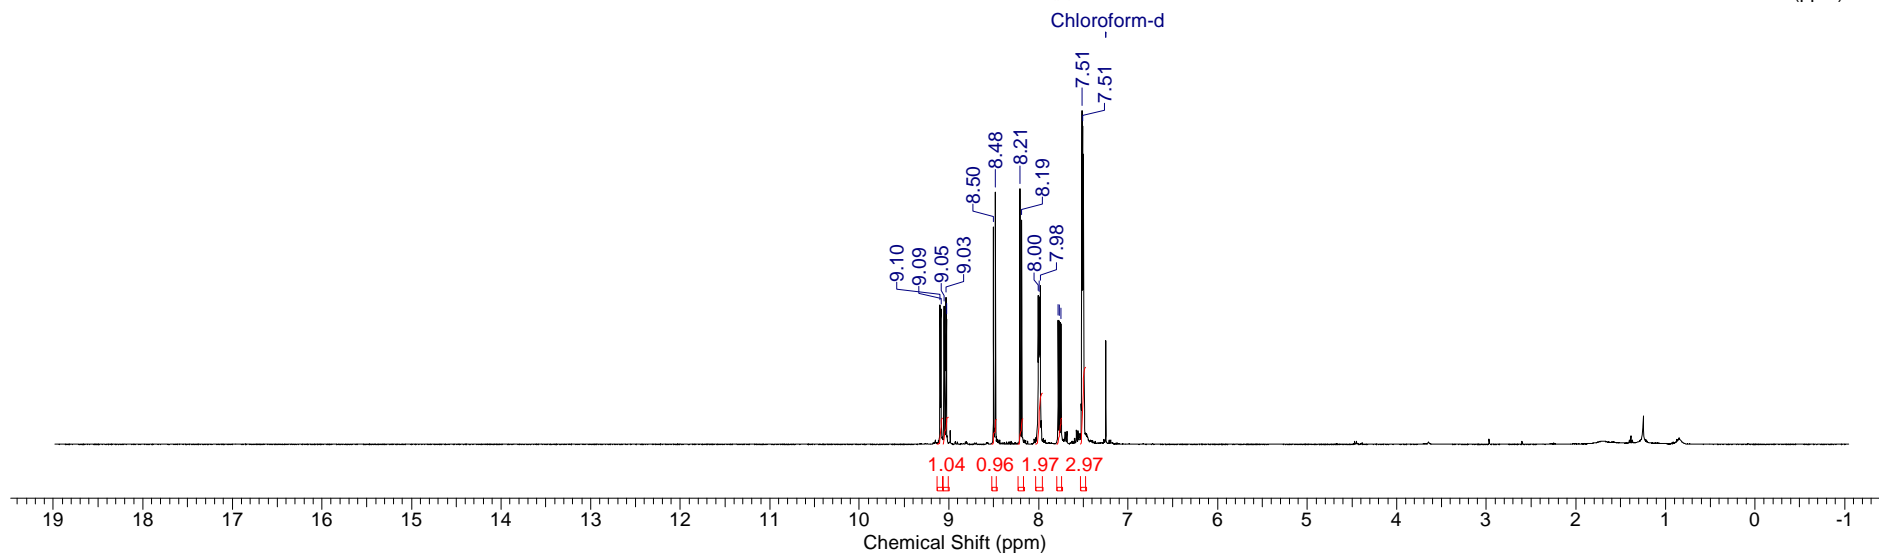<sup>1</sup>H NMR spectrum of **9** (400.1 MHz, CDCl<sub>3</sub>)

|                        |                                                                            |                      |                      |                       |                 |                        |        |
|------------------------|----------------------------------------------------------------------------|----------------------|----------------------|-----------------------|-----------------|------------------------|--------|
| Acquisition Time (sec) | 1.7433                                                                     | Comment              | Imported from UXNMR. |                       | Date            | 16 Apr 2022 13:50:10   |        |
| File Name              | C:\DOCS\BM\ЯМР СОСЕДИ\2022\16-04-2022_14-19-08\BM-2501-R\BM-2501-R_005001r |                      |                      |                       | Frequency (MHz) | 376.50                 |        |
| Nucleus                | 19F                                                                        | Number of Transients | 16                   | Original Points Count | 131072          | Points Count           | 262144 |
| Pulse Sequence         | zgfgqn                                                                     | Solvent              | CHLOROFORM-D         | Sweep Width (Hz)      | 75187.97        | Temperature (degree C) | 27.000 |

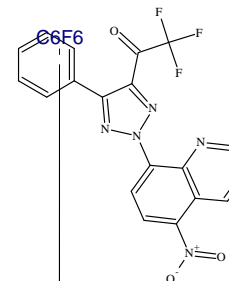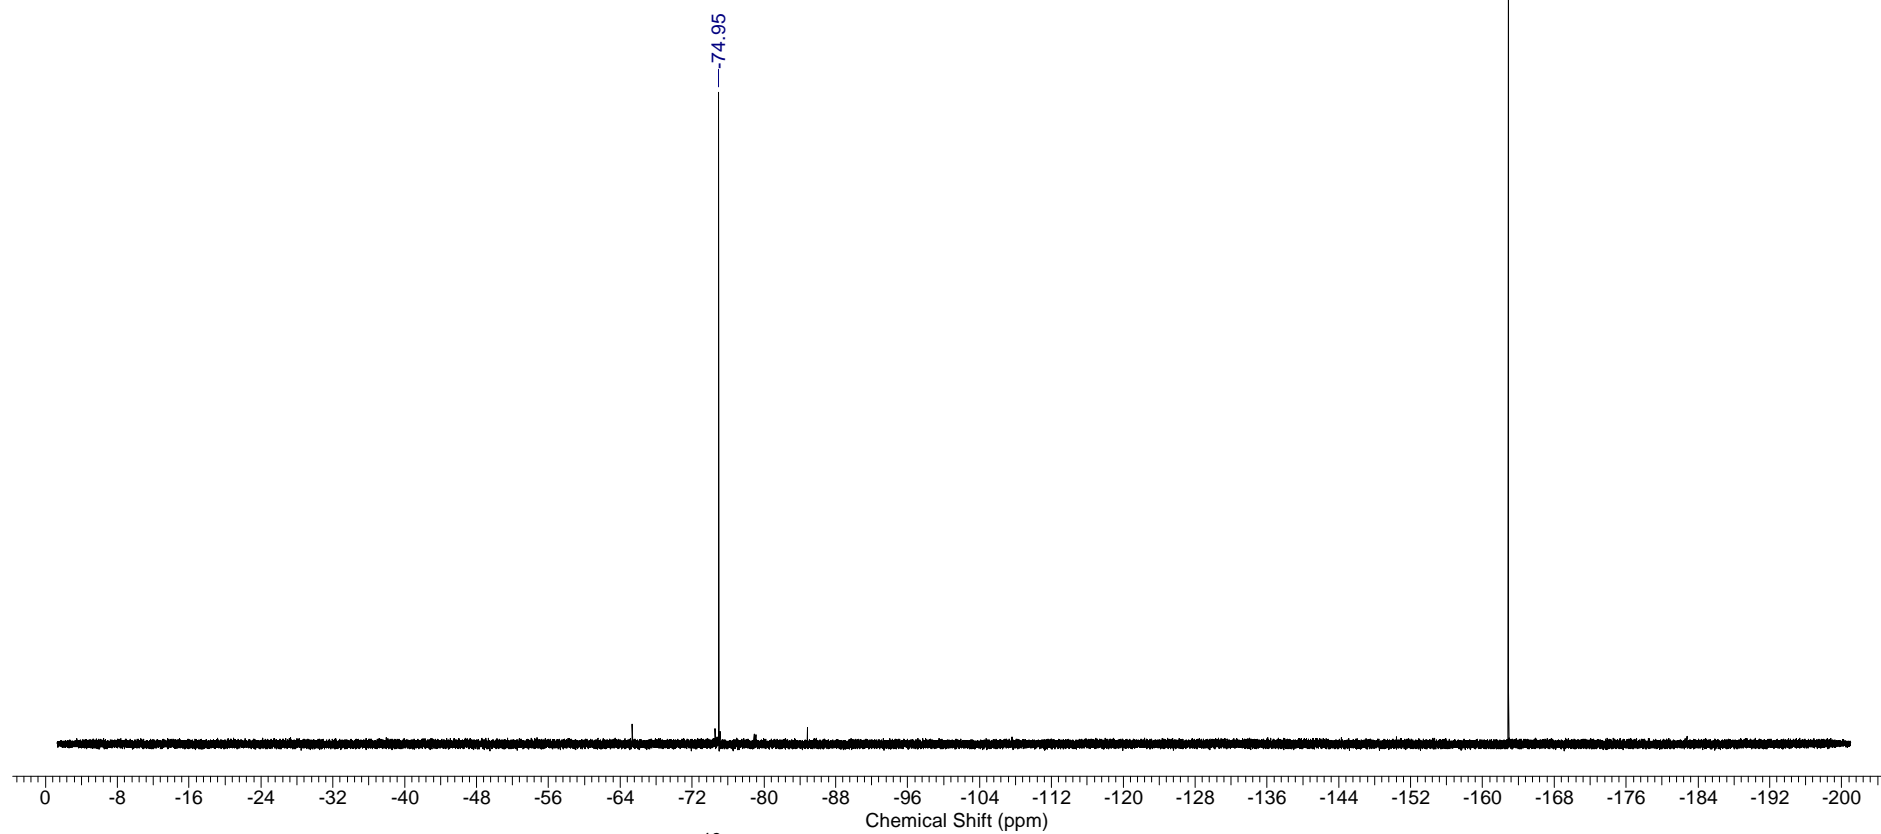

<sup>19</sup>F NMR spectrum of **9** (376.5 MHz, CDCl<sub>3</sub>)

|                               |                                        |                               |                      |                       |                 |                             |              |
|-------------------------------|----------------------------------------|-------------------------------|----------------------|-----------------------|-----------------|-----------------------------|--------------|
| <b>Acquisition Time (sec)</b> | 0.6783                                 | <b>Comment</b>                | Imported from UXNMR. |                       | <b>Date</b>     | 19 Apr 2022 15:40:42        |              |
| <b>File Name</b>              | H:\VAMP\19.04.2022\BM-2501-2.C_002001r | <b>Frequency (MHz)</b>        | 100.61               | <b>Nucleus</b>        | <sup>13</sup> C | <b>Number of Transients</b> | 314          |
| <b>Original Points Count</b>  | 16384                                  | <b>Points Count</b>           | 131072               | <b>Pulse Sequence</b> | zgpg30          | <b>Solvent</b>              | CHLOROFORM-D |
| <b>Sweep Width (Hz)</b>       | 24154.59                               | <b>Temperature (degree C)</b> | 27.000               |                       |                 |                             |              |

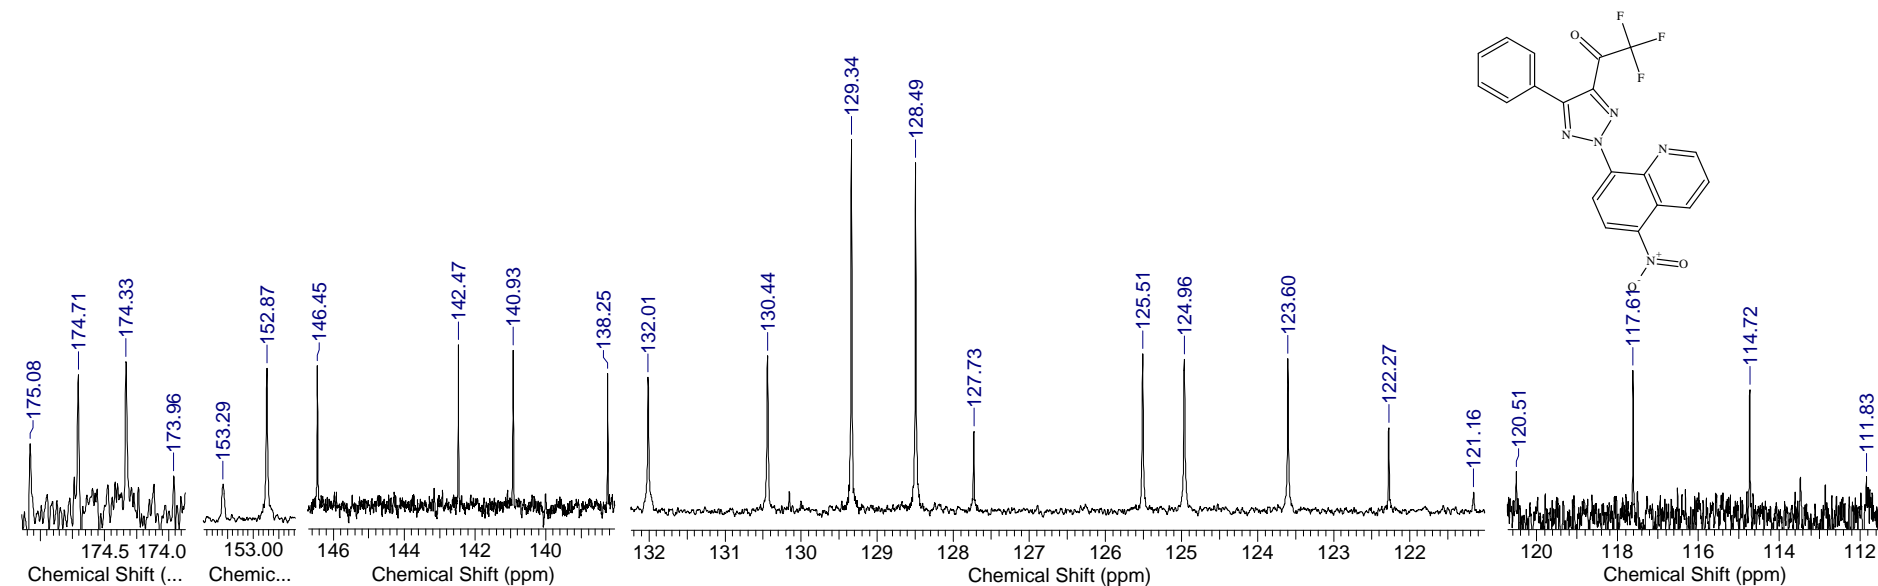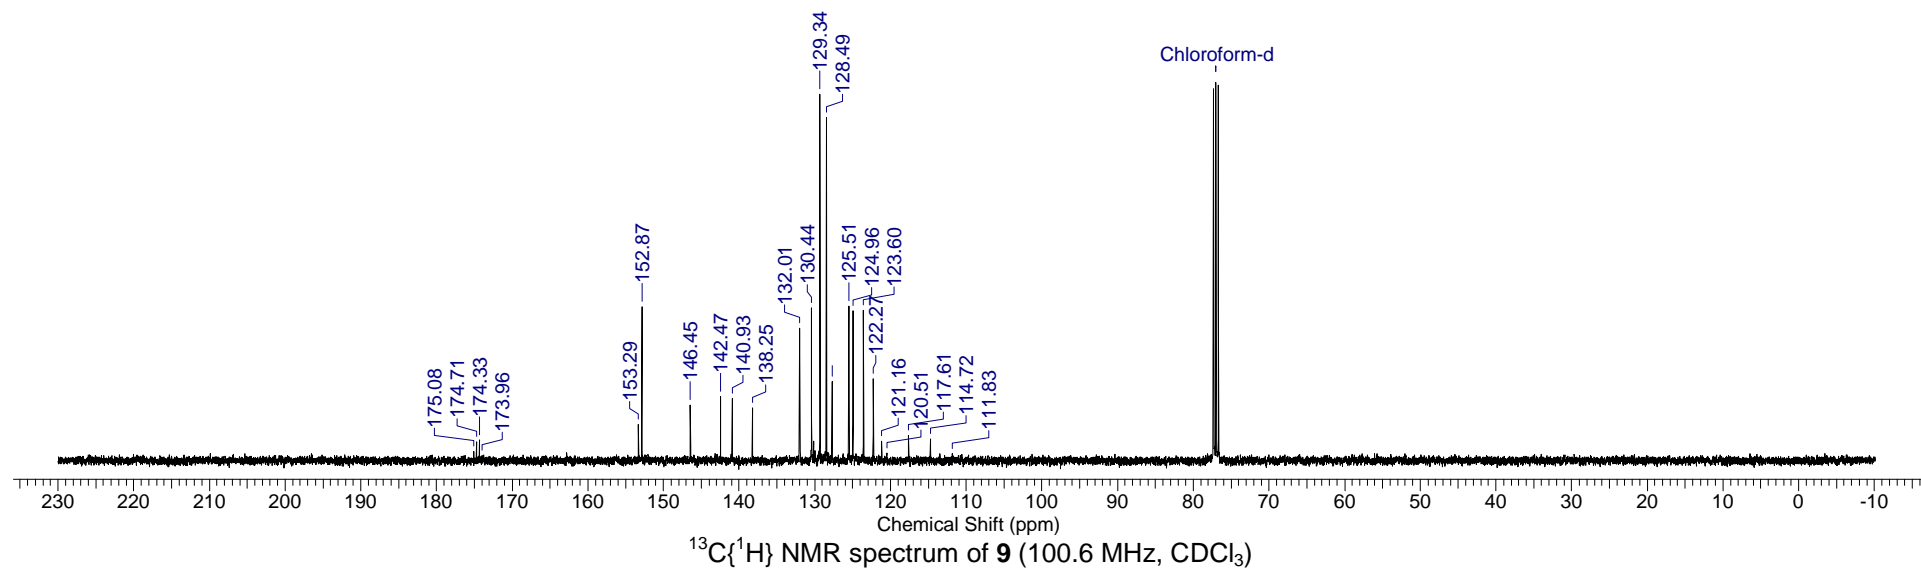

|                               |                                                      |                             |                      |                              |                      |
|-------------------------------|------------------------------------------------------|-----------------------------|----------------------|------------------------------|----------------------|
| <b>Acquisition Time (sec)</b> | 4.0894                                               | <b>Comment</b>              | Imported from UXMNR. | <b>Date</b>                  | 09 Apr 2022 13:48:12 |
| <b>File Name</b>              | C:\DOCS\BM\MP_COCEДИ\2022\bm220409\BM-2489-2_001001r |                             |                      | <b>Frequency (MHz)</b>       | 400.13               |
| <b>Nucleus</b>                | <sup>1</sup> H                                       | <b>Number of Transients</b> | 8                    | <b>Original Points Count</b> | 32768                |
| <b>Pulse Sequence</b>         | zg30                                                 | <b>Solvent</b>              | CHLOROFORM-D         | <b>Points Count</b>          | 131072               |
| <b>Temperature (degree C)</b> | 27.000                                               |                             |                      | <b>Sweep Width (Hz)</b>      | 8012.82              |

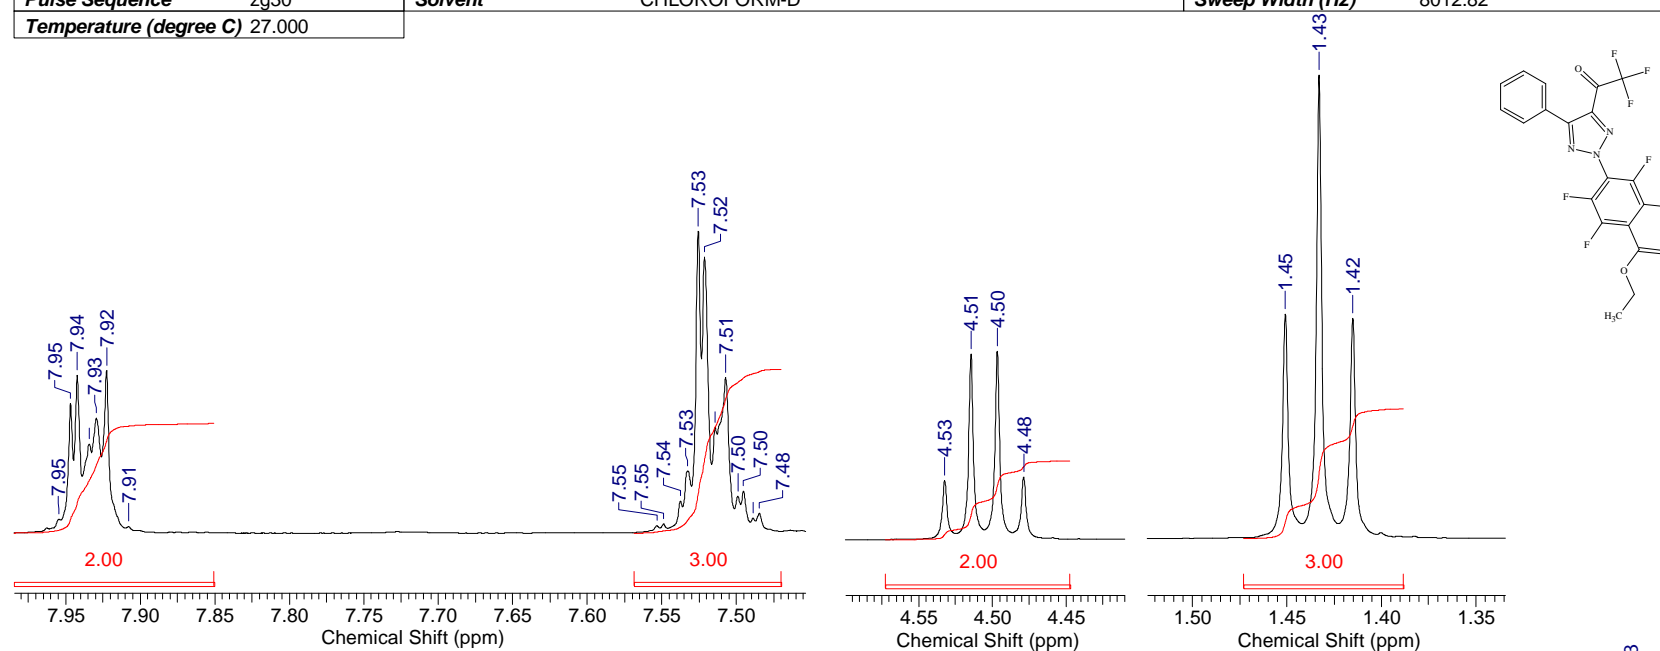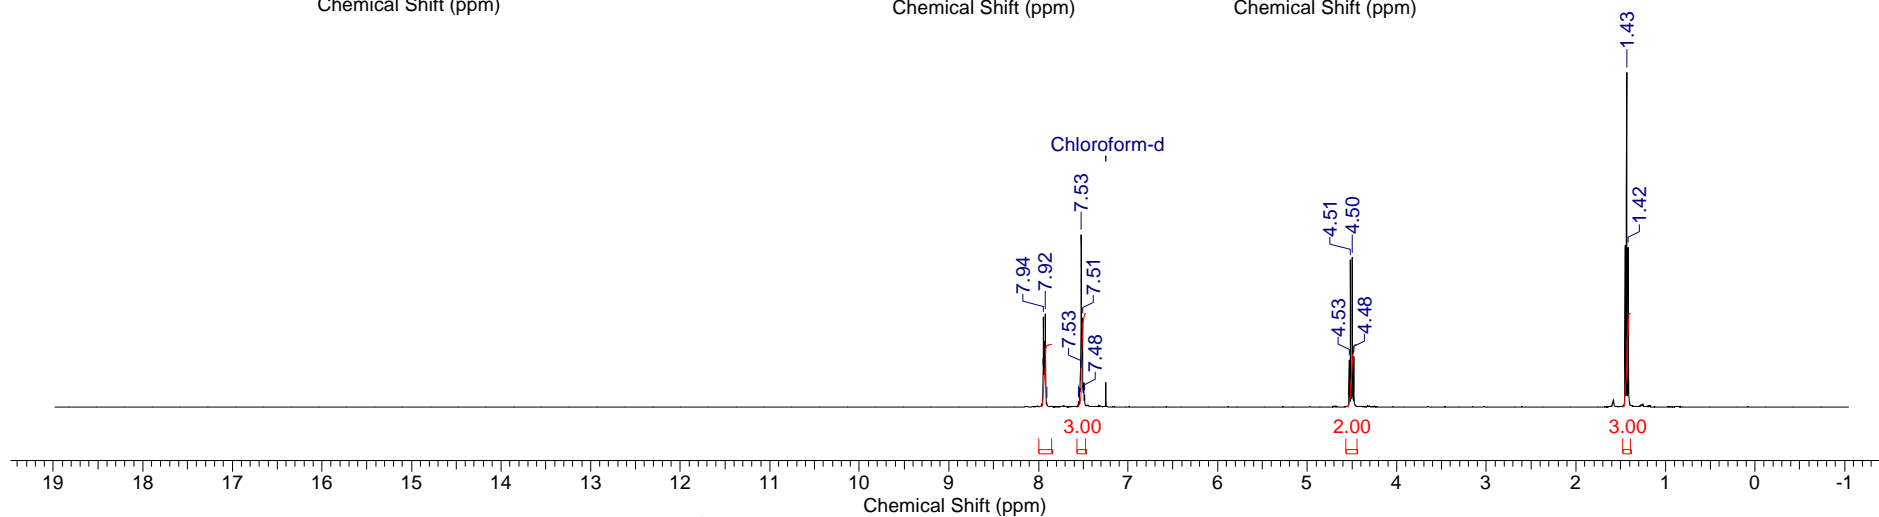<sup>1</sup>H NMR spectrum of **10** (400.1 MHz, CDCl<sub>3</sub>)



|                               |                                                      |                             |                      |                              |                      |
|-------------------------------|------------------------------------------------------|-----------------------------|----------------------|------------------------------|----------------------|
| <b>Acquisition Time (sec)</b> | 1.7433                                               | <b>Comment</b>              | Imported from UXNMR. | <b>Date</b>                  | 09 Apr 2022 13:59:12 |
| <b>File Name</b>              | C:\DOCS\BM\MP_COCEДИ\2022\bm220409\BM-2489-2_005001r |                             |                      | <b>Frequency (MHz)</b>       | 376.50               |
| <b>Nucleus</b>                | <sup>19</sup> F                                      | <b>Number of Transients</b> | 16                   | <b>Original Points Count</b> | 131072               |
| <b>Pulse Sequence</b>         | zgfgn                                                | <b>Solvent</b>              | CHLOROFORM-D         | <b>Points Count</b>          | 262144               |
| <b>Temperature (degree C)</b> | 27.000                                               |                             |                      | <b>Sweep Width (Hz)</b>      | 75187.97             |

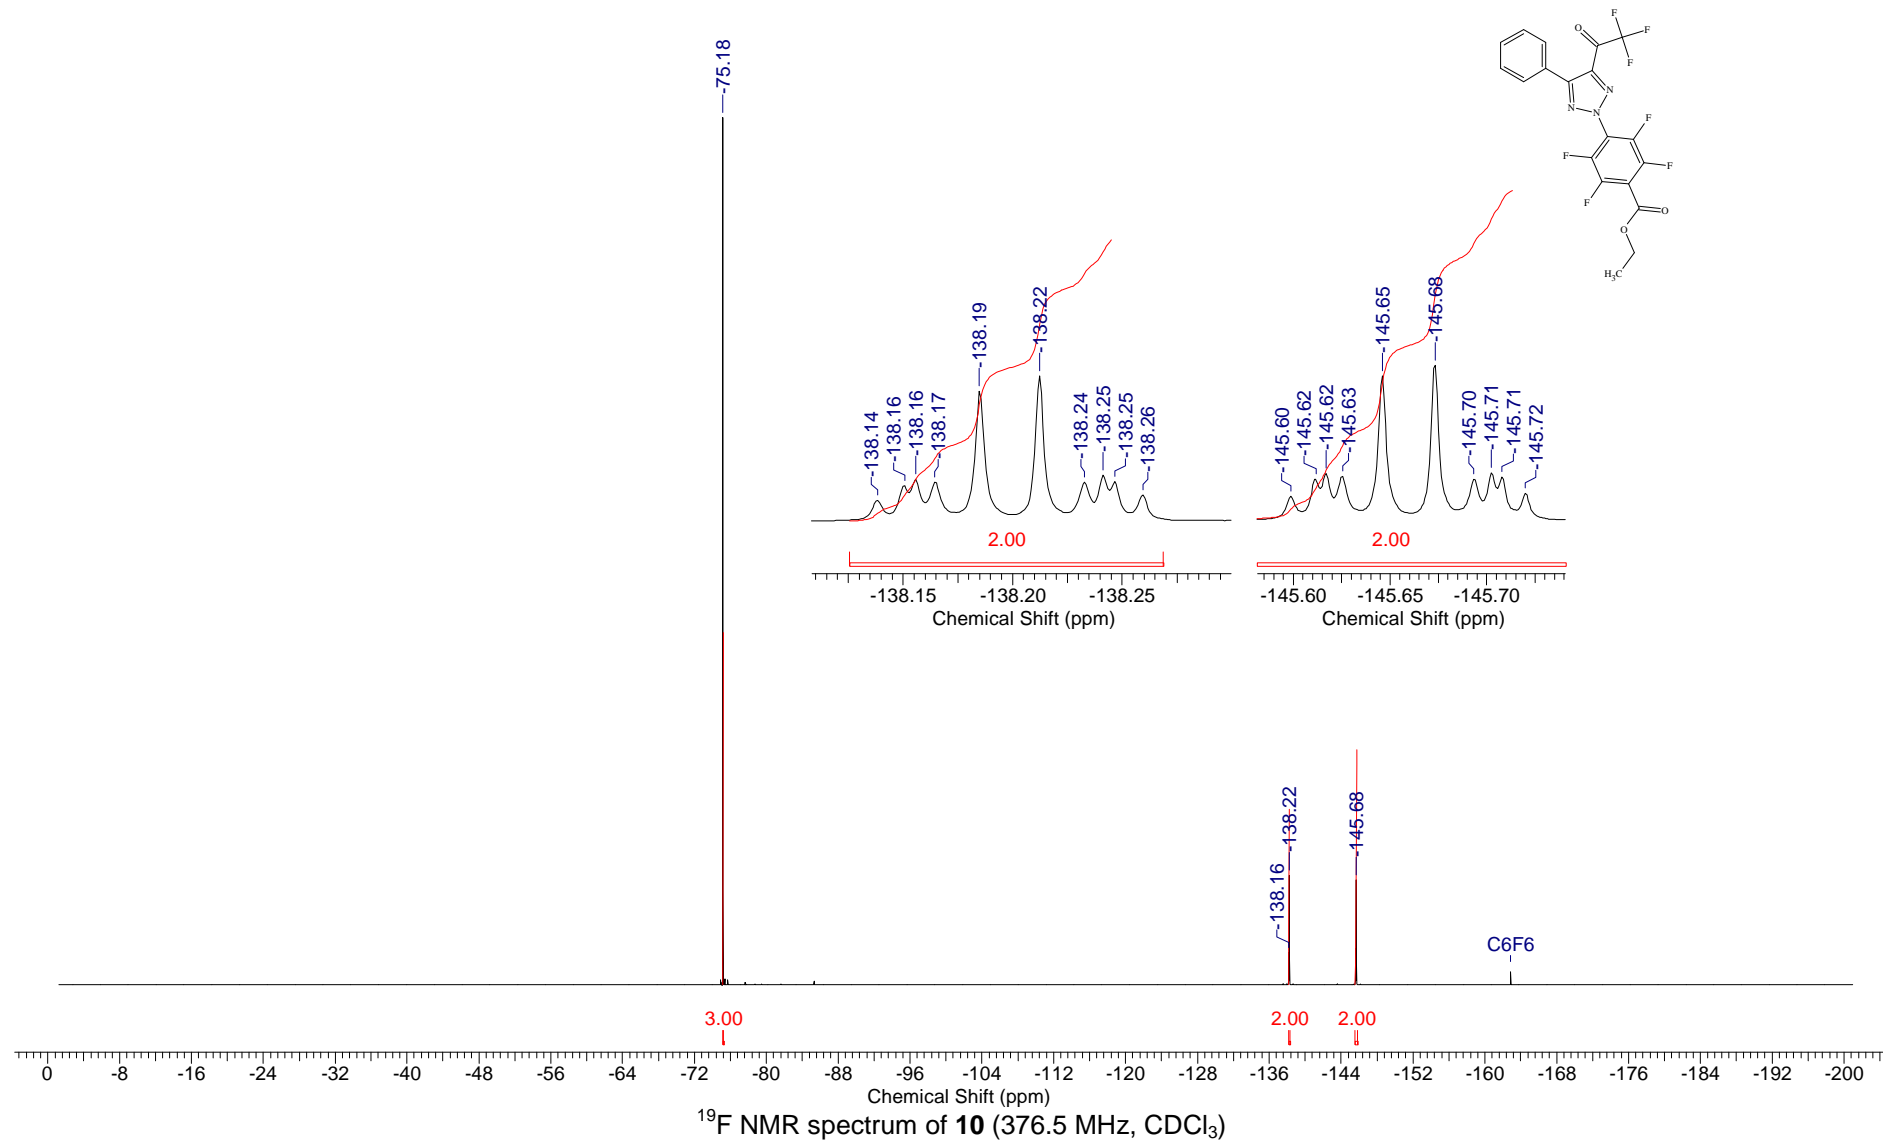

|                        |                                                       |                      |                      |                       |       |                  |                      |
|------------------------|-------------------------------------------------------|----------------------|----------------------|-----------------------|-------|------------------|----------------------|
| Acquisition Time (sec) | 0.6783                                                | Comment              | Imported from UXNMR. |                       |       | Date             | 12 Apr 2022 14:16:50 |
| File Name              | C:\DOCS\OUTPUT_301\2022\04.апрель\BM-2489-2.C_002001r |                      |                      |                       |       | Frequency (MHz)  | 100.61               |
| Nucleus                | 13C                                                   | Number of Transients | 922                  | Original Points Count | 16384 | Points Count     | 131072               |
| Pulse Sequence         | zgpg30                                                | Solvent              | CHLOROFORM-D         |                       |       | Sweep Width (Hz) | 24154.59             |
| Temperature (degree C) | 27.000                                                |                      |                      |                       |       |                  |                      |

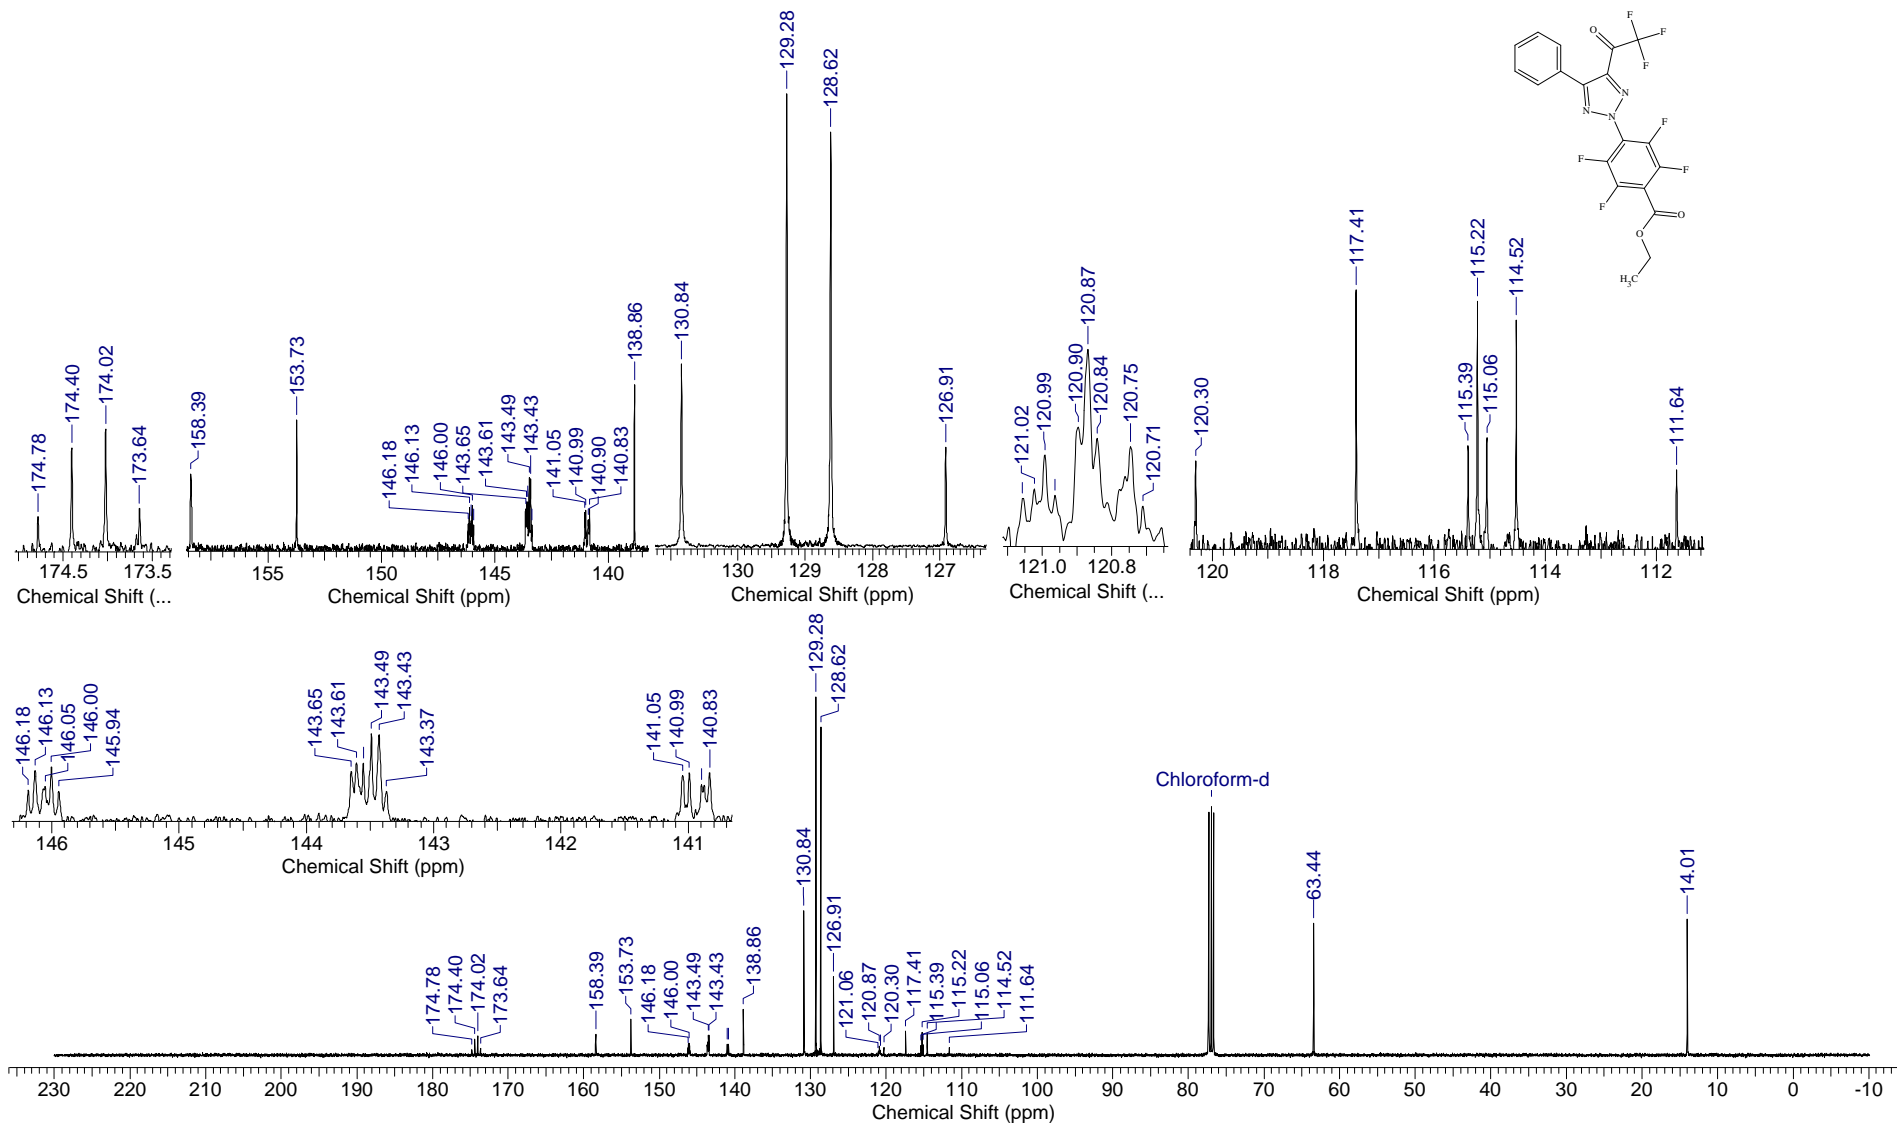<sup>13</sup>C{<sup>1</sup>H} NMR spectrum of **10** (100.6 MHz, CDCl<sub>3</sub>)

|                        |                                                         |                      |                      |                       |                  |                      |        |
|------------------------|---------------------------------------------------------|----------------------|----------------------|-----------------------|------------------|----------------------|--------|
| Acquisition Time (sec) | 4.0894                                                  | Comment              | Imported from UXNMR. |                       | Date             | 31 Oct 2022 15:59:38 |        |
| File Name              | C:\DOCS\OUTPUT_301\2022\10.октябрь\SA-BM-2672.H_001001r |                      |                      |                       | Frequency (MHz)  | 400.13               |        |
| Nucleus                | 1H                                                      | Number of Transients | 4                    | Original Points Count | 32768            | Points Count         | 131072 |
| Pulse Sequence         | zg30                                                    | Solvent              | CHLOROFORM-D         |                       | Sweep Width (Hz) | 8012.82              |        |
| Temperature (degree C) | 27.000                                                  |                      |                      |                       |                  |                      |        |

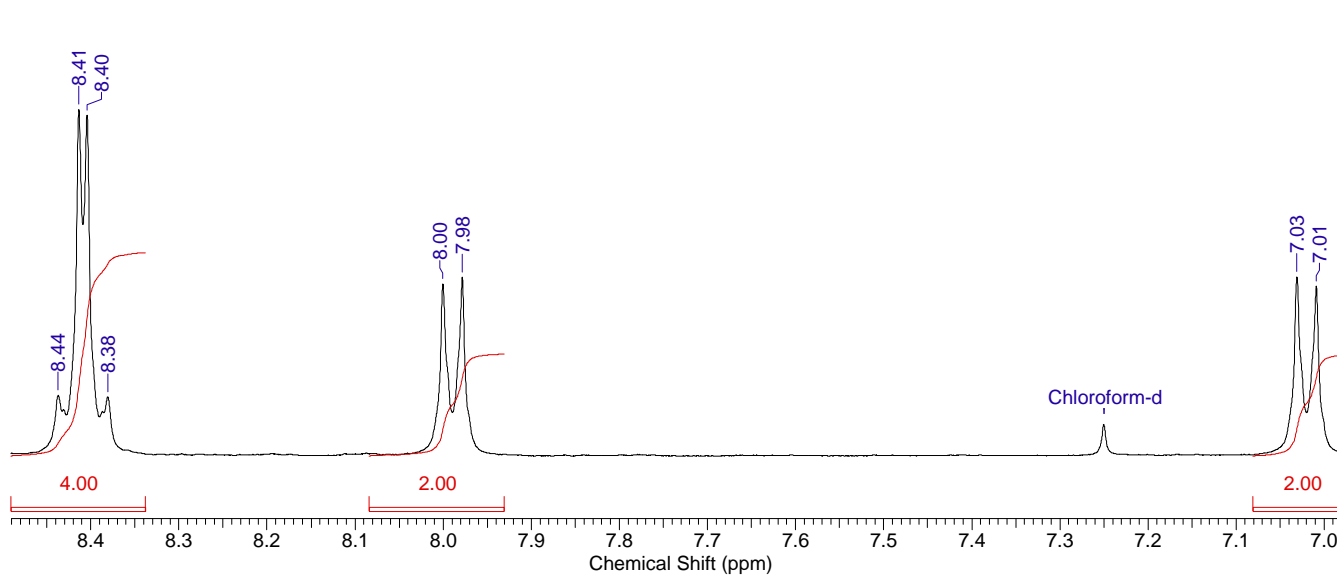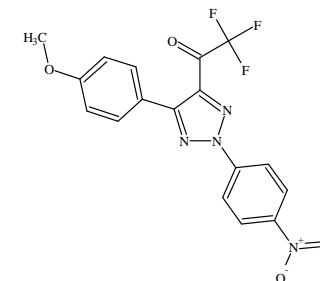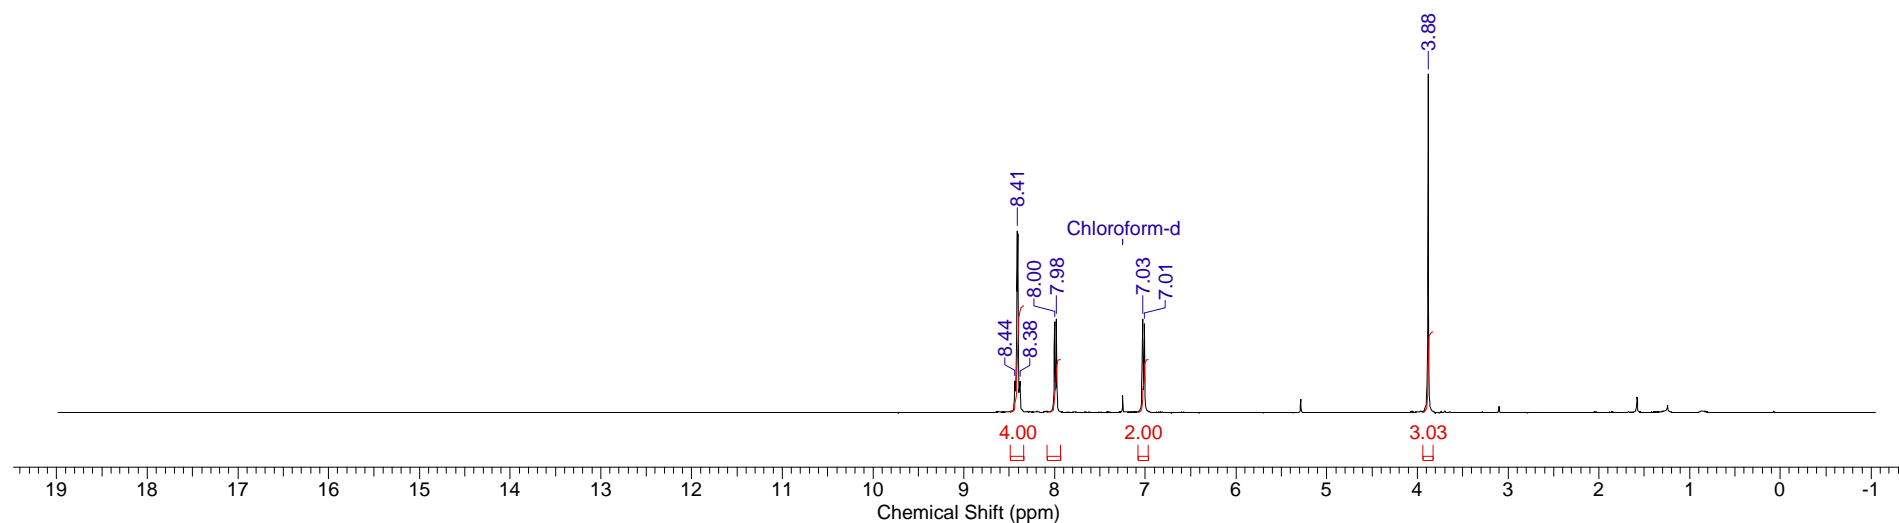

<sup>1</sup>H NMR spectrum of **11** (400.1 MHz, CDCl<sub>3</sub>)

|                               |                                                         |                             |                      |                              |                      |
|-------------------------------|---------------------------------------------------------|-----------------------------|----------------------|------------------------------|----------------------|
| <b>Acquisition Time (sec)</b> | 1.7433                                                  | <b>Comment</b>              | Imported from UXNMR. | <b>Date</b>                  | 31 Oct 2022 15:49:56 |
| <b>File Name</b>              | C:\DOCS\OUTPUT_301\2022\10.октябрь\SA-BM-2672.F_005001r |                             |                      | <b>Frequency (MHz)</b>       | 376.50               |
| <b>Nucleus</b>                | <sup>19</sup> F                                         | <b>Number of Transients</b> | 16                   | <b>Original Points Count</b> | 131072               |
| <b>Pulse Sequence</b>         | zgfgn                                                   | <b>Solvent</b>              | CHLOROFORM-D         | <b>Points Count</b>          | 262144               |
| <b>Temperature (degree C)</b> | 27.000                                                  |                             |                      | <b>Sweep Width (Hz)</b>      | 75187.97             |

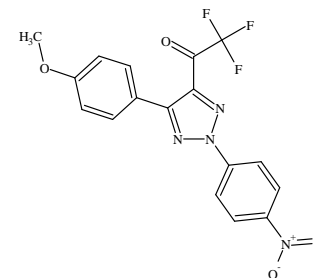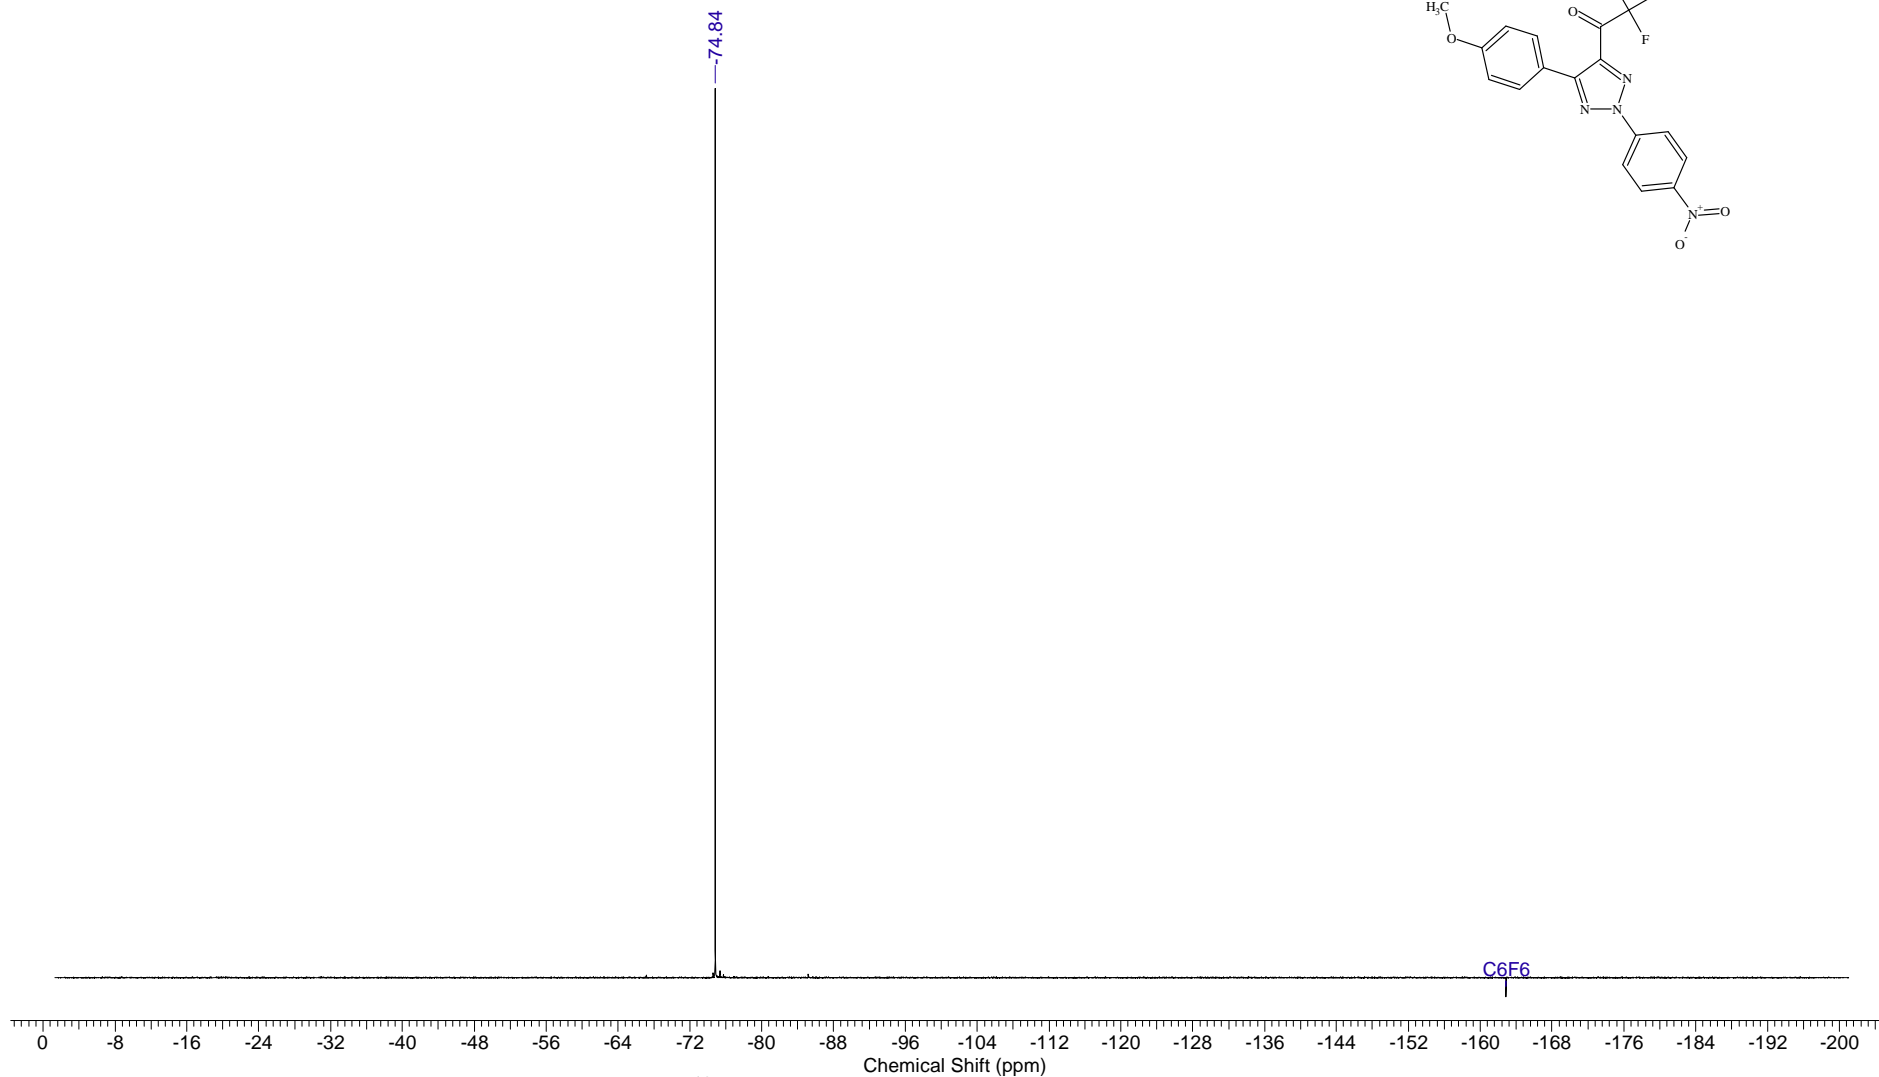

|                               |                                                        |                             |                      |                              |                         |                      |        |
|-------------------------------|--------------------------------------------------------|-----------------------------|----------------------|------------------------------|-------------------------|----------------------|--------|
| <b>Acquisition Time (sec)</b> | 0.6783                                                 | <b>Comment</b>              | Imported from UXNMR. |                              | <b>Date</b>             | 01 Nov 2022 14:13:08 |        |
| <b>File Name</b>              | C:\DOCS\OUTPUT_301\2022\11.ноябрь\SA-BM-2672.C_002001r |                             |                      |                              | <b>Frequency (MHz)</b>  | 100.61               |        |
| <b>Nucleus</b>                | 13C                                                    | <b>Number of Transients</b> | 356                  | <b>Original Points Count</b> | 16384                   | <b>Points Count</b>  | 131072 |
| <b>Pulse Sequence</b>         | zgpg30                                                 | <b>Solvent</b>              | CHLOROFORM-D         |                              | <b>Sweep Width (Hz)</b> | 24154.59             |        |
| <b>Temperature (degree C)</b> | 27.000                                                 |                             |                      |                              |                         |                      |        |

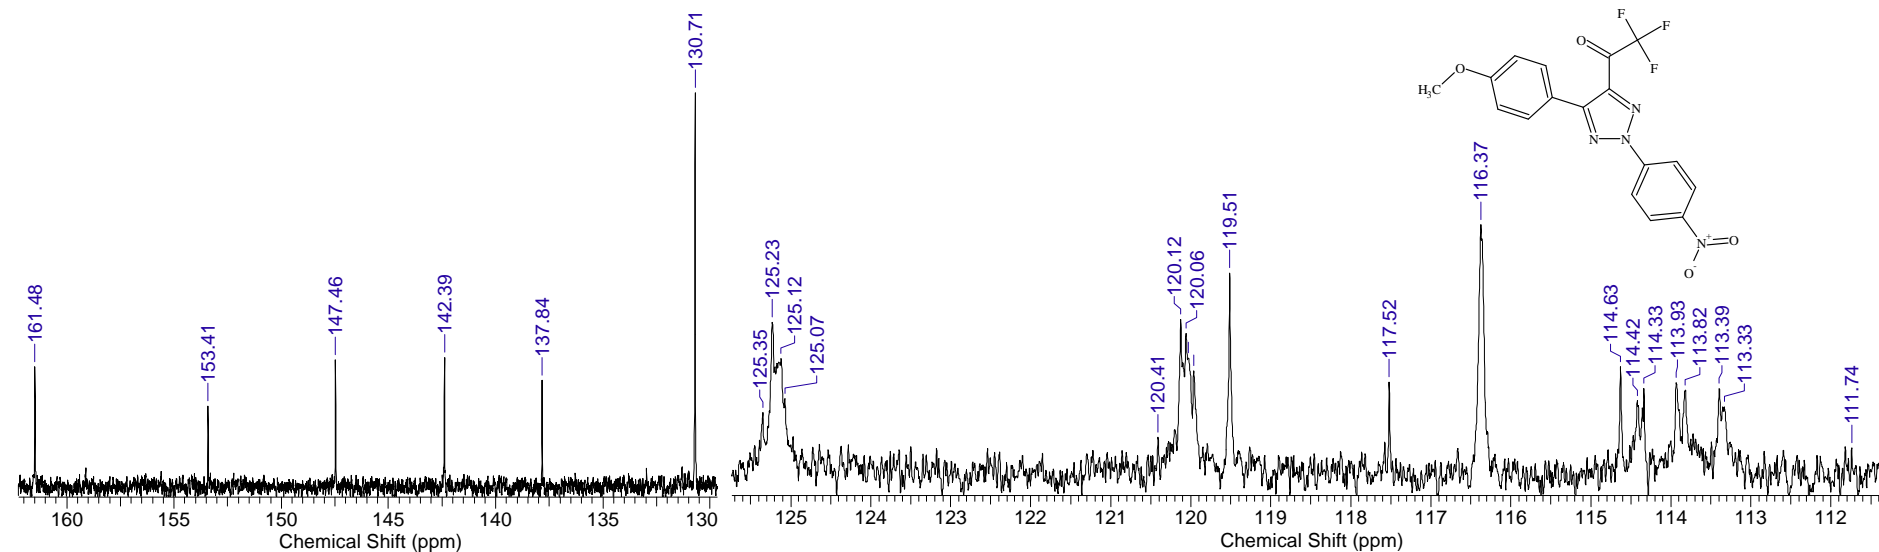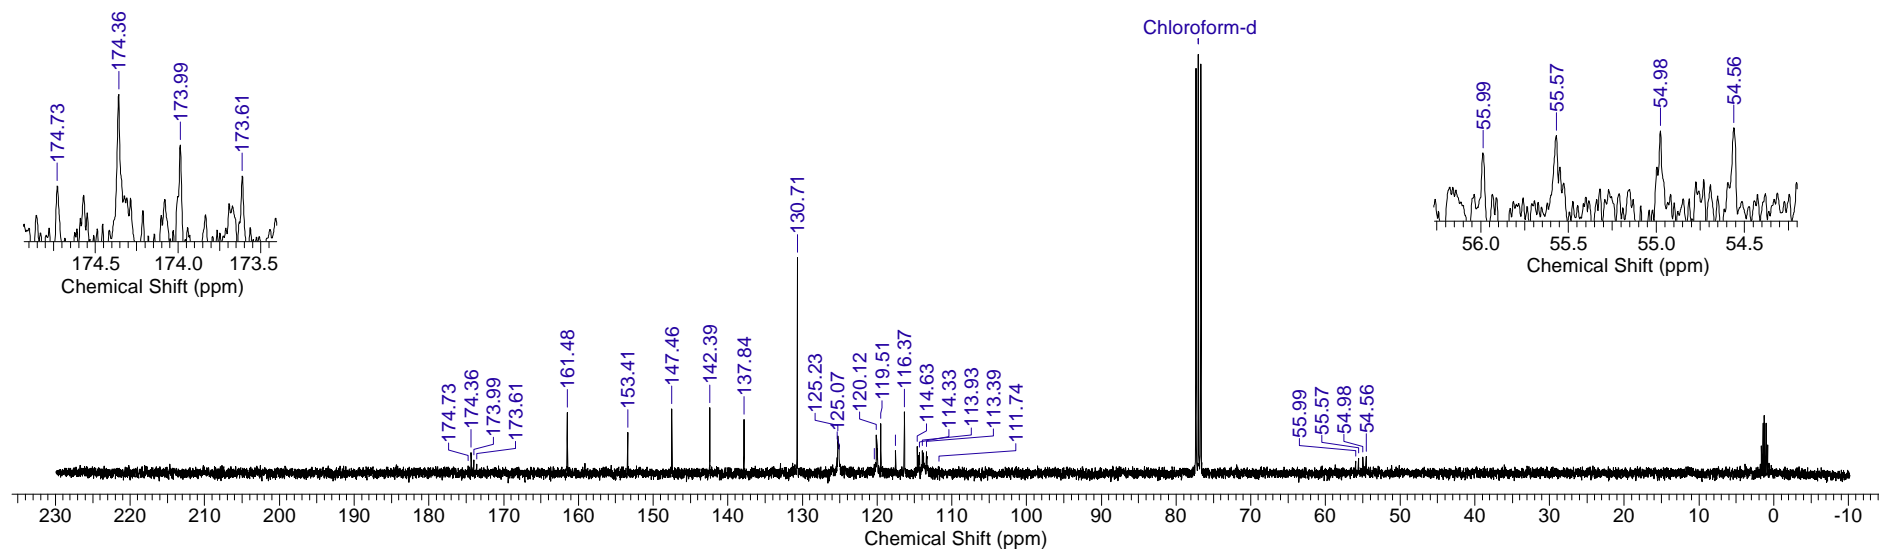<sup>13</sup>C{<sup>1</sup>H} NMR spectrum of **11** (100.6 MHz, CDCl<sub>3</sub>)

|                               |                                                        |                             |                      |                              |                      |
|-------------------------------|--------------------------------------------------------|-----------------------------|----------------------|------------------------------|----------------------|
| <b>Acquisition Time (sec)</b> | 4.0894                                                 | <b>Comment</b>              | Imported from UXNMR. | <b>Date</b>                  | 13 Dec 2022 15:36:00 |
| <b>File Name</b>              | C:\DOCS\OUTPUT_301\2022\12_декабрь\BM-2697-2.H_001001r |                             |                      | <b>Frequency (MHz)</b>       | 400.13               |
| <b>Nucleus</b>                | <sup>1</sup> H                                         | <b>Number of Transients</b> | 4                    | <b>Original Points Count</b> | 32768                |
| <b>Pulse Sequence</b>         | zg30                                                   | <b>Solvent</b>              | CHLOROFORM-D         | <b>Points Count</b>          | 131072               |
| <b>Temperature (degree C)</b> | 27.000                                                 |                             |                      | <b>Sweep Width (Hz)</b>      | 8012.82              |

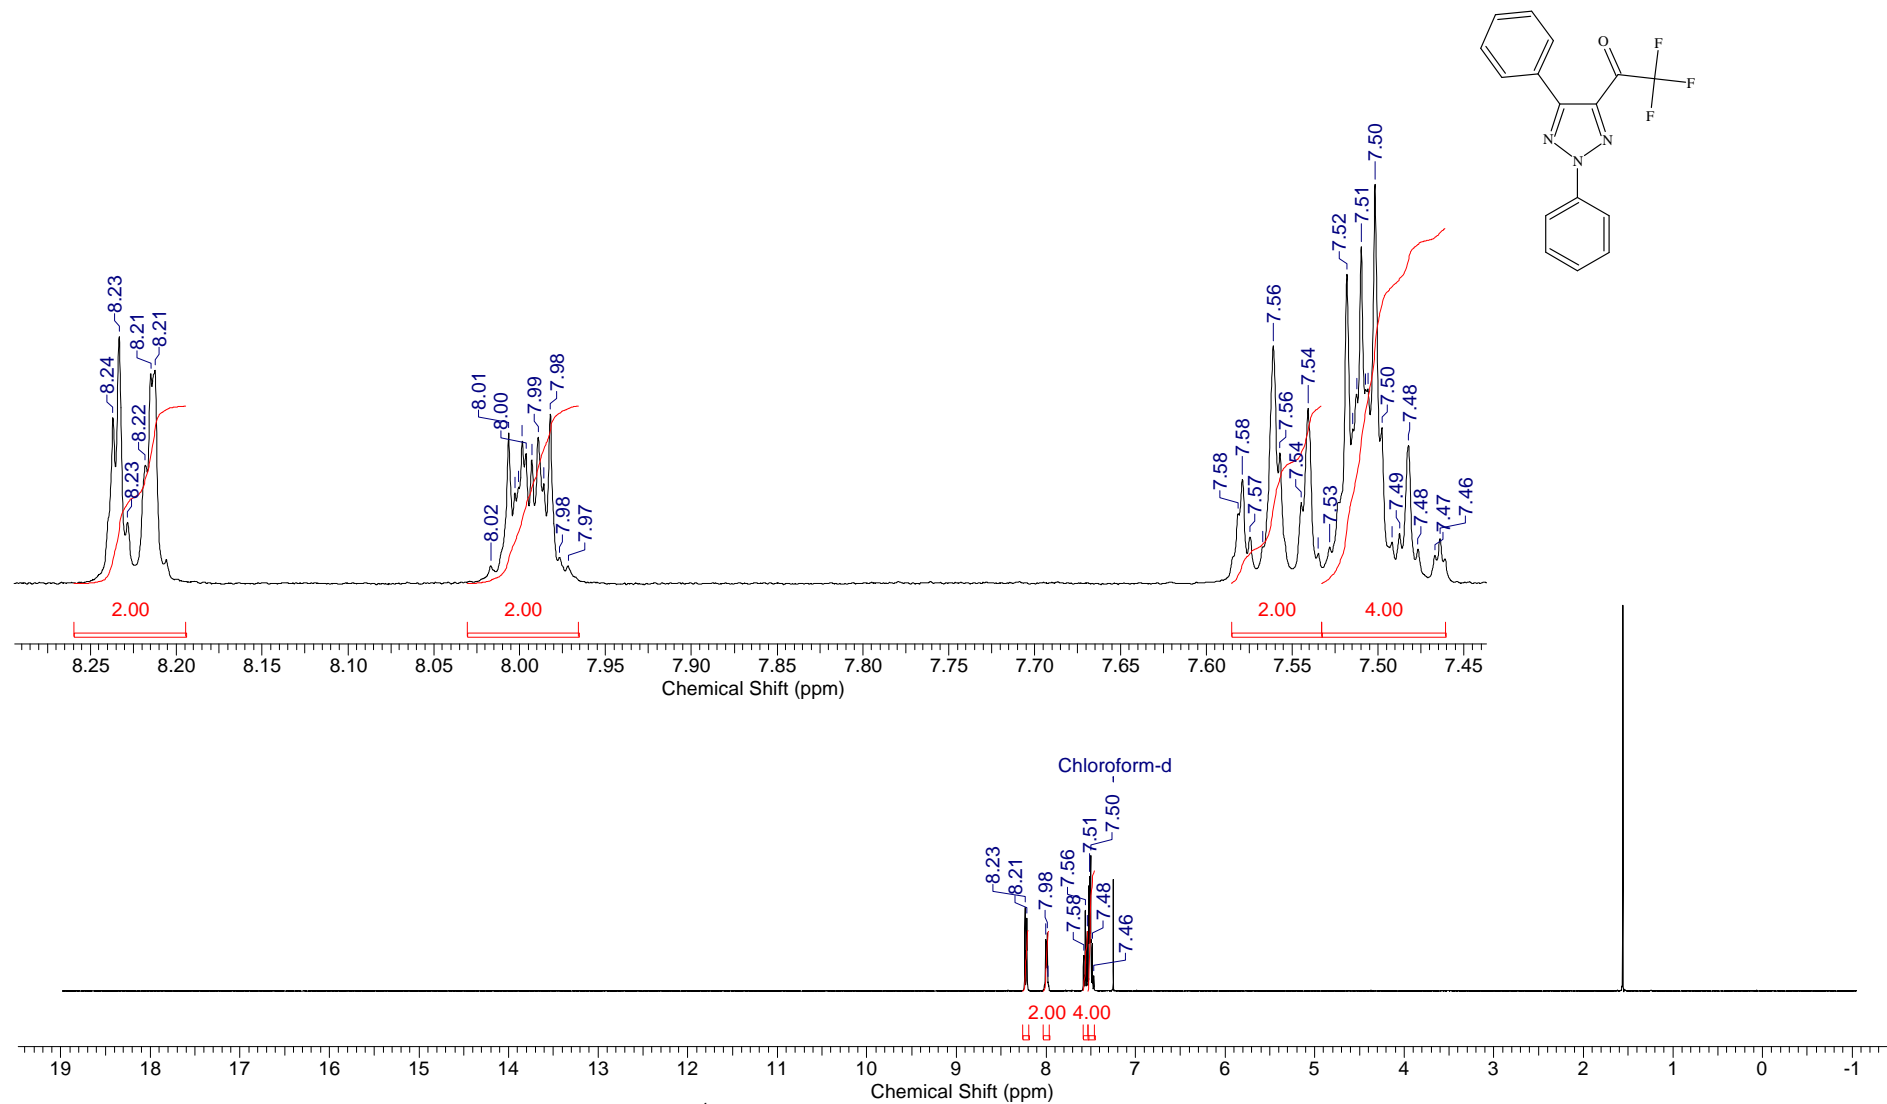<sup>1</sup>H NMR spectrum of **12** (400.1 MHz, CDCl<sub>3</sub>)

|                               |                                                        |                             |                      |                              |                         |                      |        |
|-------------------------------|--------------------------------------------------------|-----------------------------|----------------------|------------------------------|-------------------------|----------------------|--------|
| <b>Acquisition Time (sec)</b> | 1.7433                                                 | <b>Comment</b>              | Imported from UXNMR. |                              | <b>Date</b>             | 13 Dec 2022 15:37:54 |        |
| <b>File Name</b>              | C:\DOCS\OUTPUT_301\2022\12_декабрь\BM-2697-2.F_005001r |                             |                      |                              | <b>Frequency (MHz)</b>  | 376.50               |        |
| <b>Nucleus</b>                | 19F                                                    | <b>Number of Transients</b> | 14                   | <b>Original Points Count</b> | 131072                  | <b>Points Count</b>  | 262144 |
| <b>Pulse Sequence</b>         | zgfgqn                                                 | <b>Solvent</b>              | CHLOROFORM-D         |                              | <b>Sweep Width (Hz)</b> | 75187.97             |        |
| <b>Temperature (degree C)</b> | 27.000                                                 |                             |                      |                              |                         |                      |        |

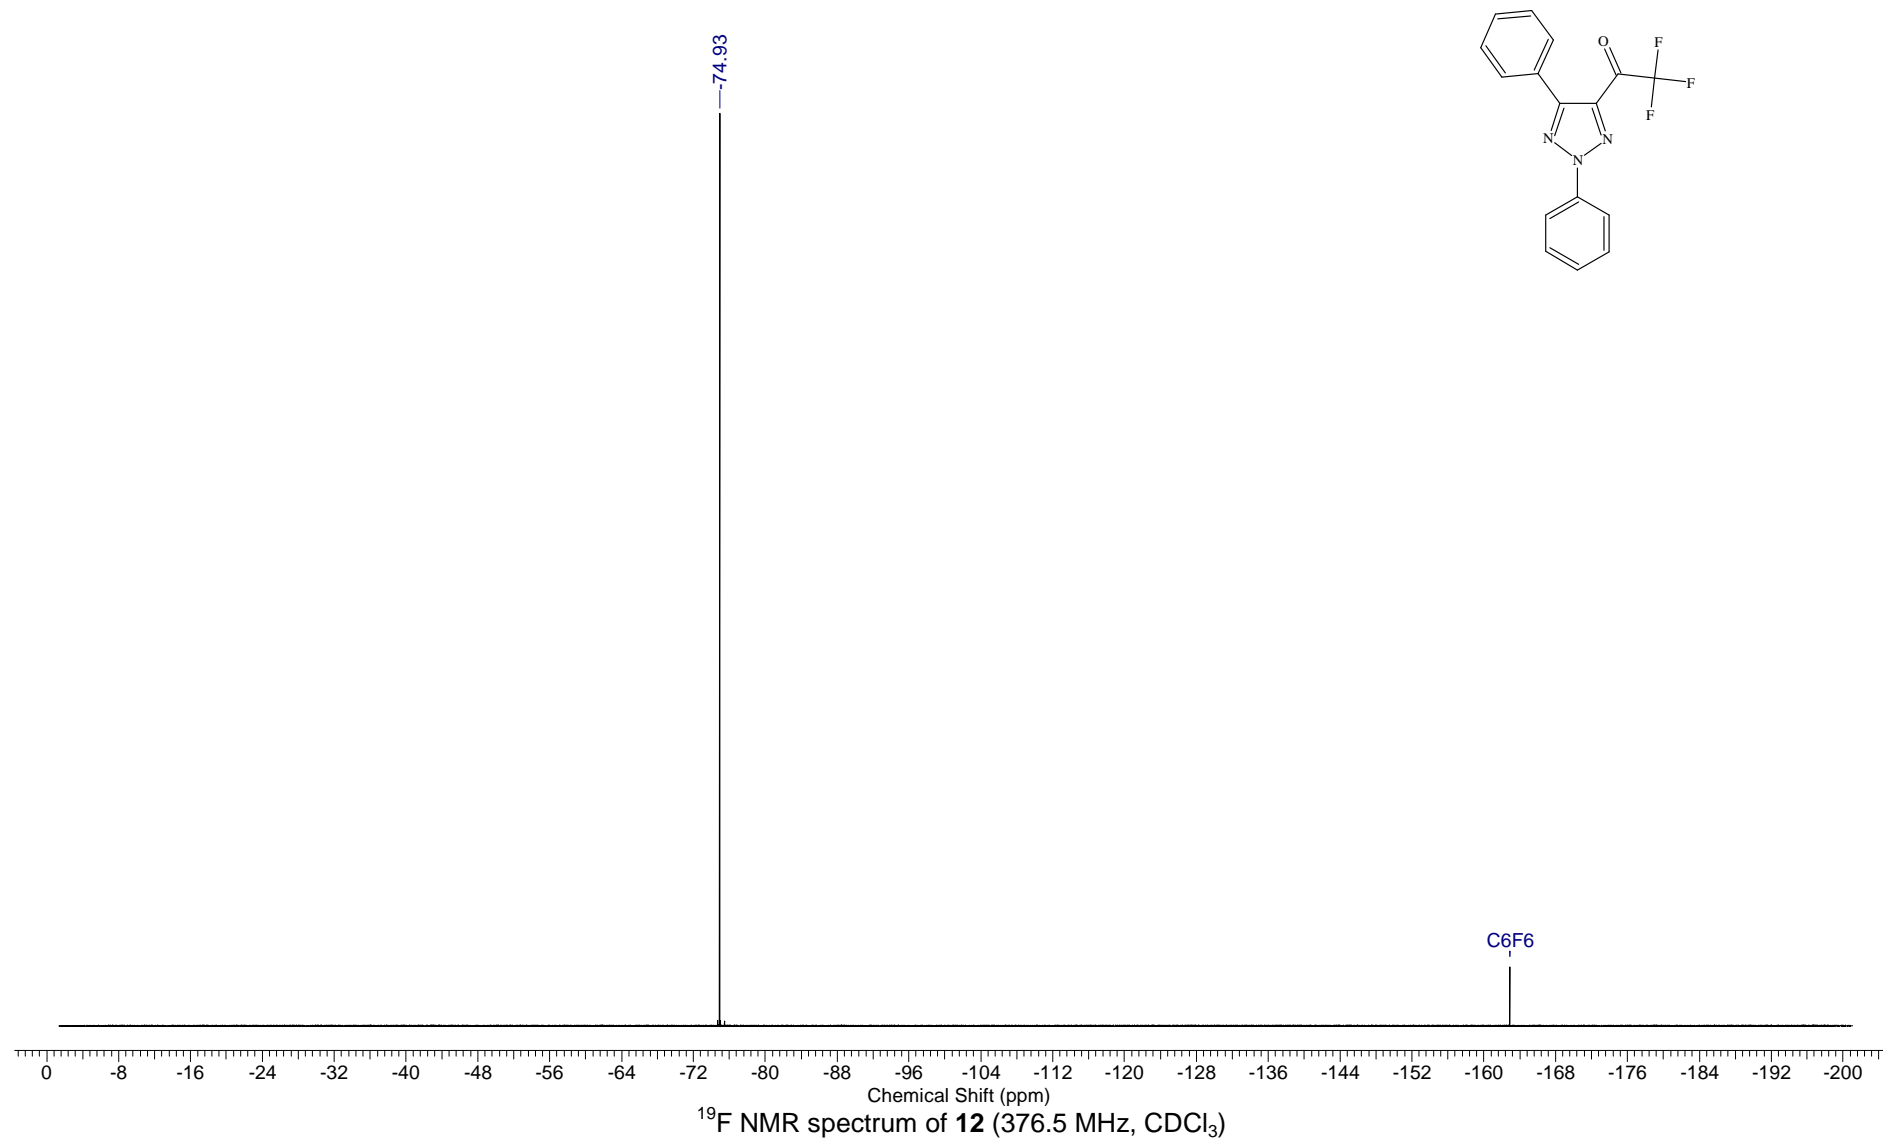

|                               |                                                       |                             |                      |                              |                      |
|-------------------------------|-------------------------------------------------------|-----------------------------|----------------------|------------------------------|----------------------|
| <b>Acquisition Time (sec)</b> | 0.6783                                                | <b>Comment</b>              | Imported from UXNMR. | <b>Date</b>                  | 21 Apr 2022 13:09:40 |
| <b>File Name</b>              | C:\DOCS\OUTPUT_301\2022\04.апрель\BM-2505-2.C_002001r | <b>Frequency (MHz)</b>      | 100.61               | <b>Points Count</b>          | 131072               |
| <b>Nucleus</b>                | <sup>13</sup> C                                       | <b>Number of Transients</b> | 763                  | <b>Original Points Count</b> | 16384                |
| <b>Pulse Sequence</b>         | zgpg30                                                | <b>Solvent</b>              | CHLOROFORM-D         | <b>Sweep Width (Hz)</b>      | 24154.59             |
| <b>Temperature (degree C)</b> | 27.000                                                |                             |                      |                              |                      |

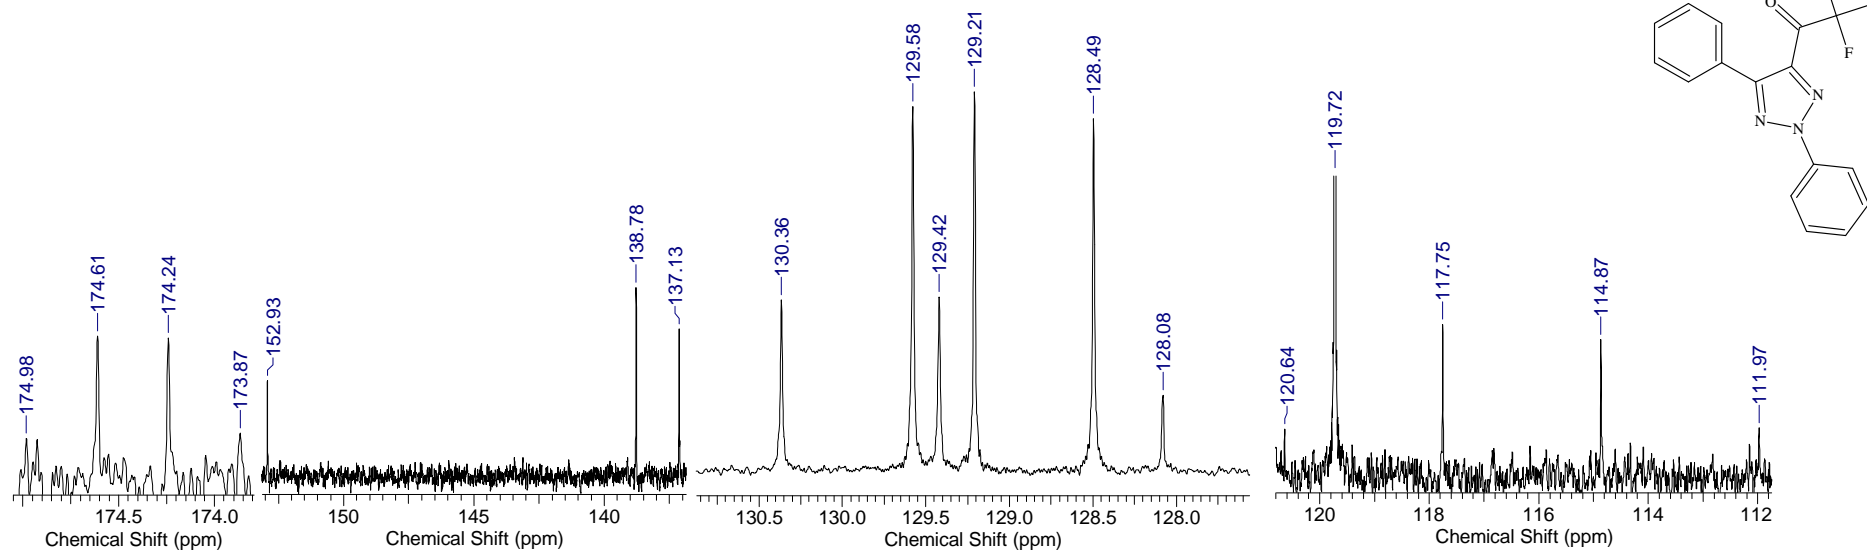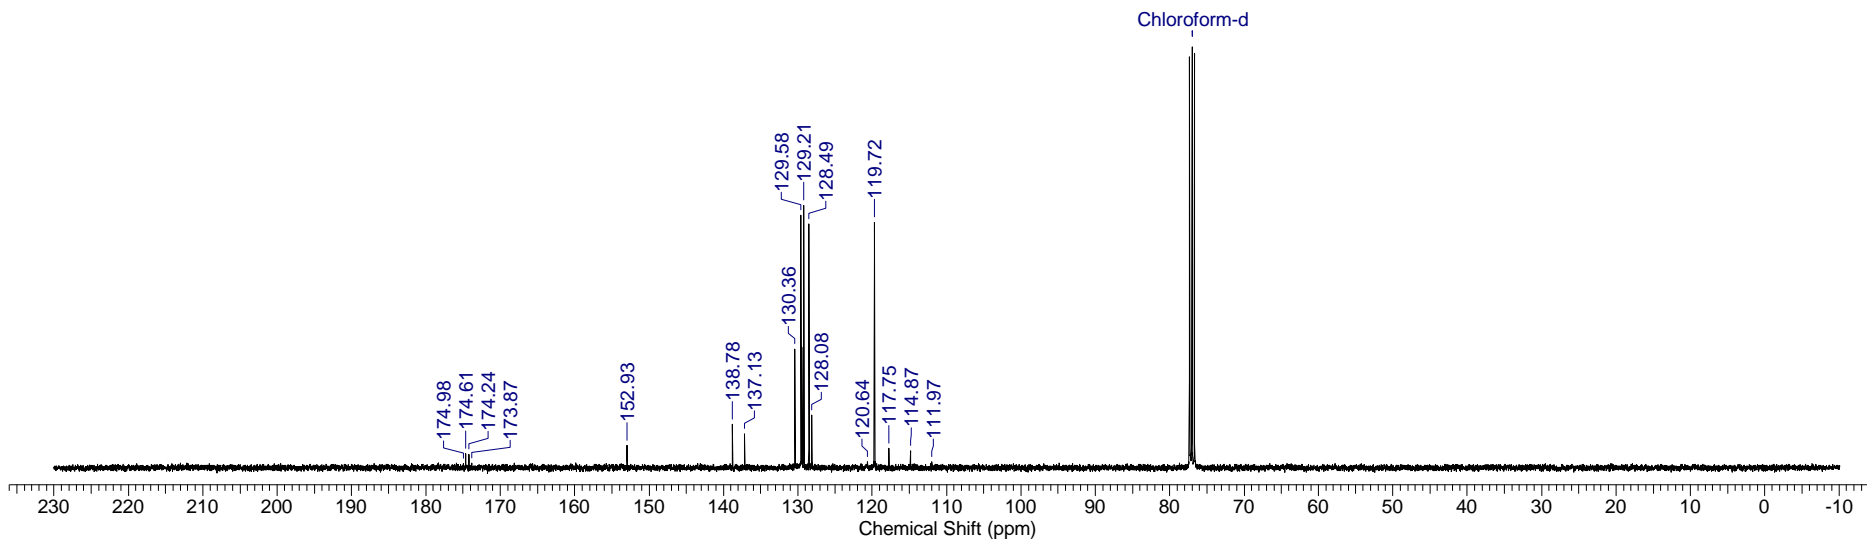<sup>13</sup>C NMR spectrum of **12** (100.6 MHz, CDCl<sub>3</sub>)



|                        |                                                    |                      |                      |                       |                      |
|------------------------|----------------------------------------------------|----------------------|----------------------|-----------------------|----------------------|
| Acquisition Time (sec) | 4.0894                                             | Comment              | Imported from UXNMR. | Date                  | 15 Oct 2022 22:41:10 |
| File Name              | C:\DOCS\BM\ЯМР_COCE\ДИ\2022\221015\BM-2650_001001r |                      |                      | Frequency (MHz)       | 400.13               |
| Nucleus                | <sup>1</sup> H                                     | Number of Transients | 8                    | Original Points Count | 32768                |
| Pulse Sequence         | zg30                                               | Solvent              | CHLOROFORM-D         | Points Count          | 131072               |
| Temperature (degree C) | 27.000                                             |                      |                      | Sweep Width (Hz)      | 8012.82              |

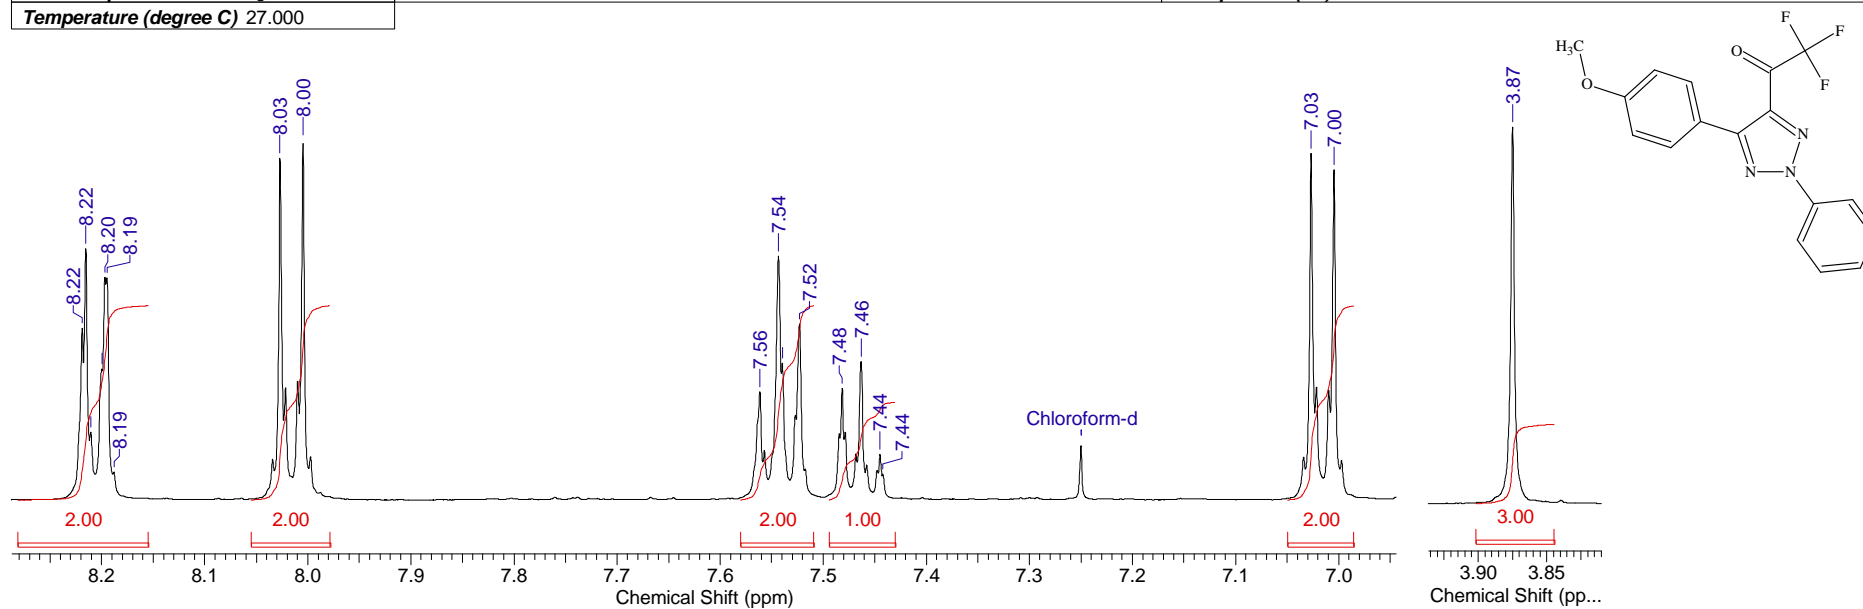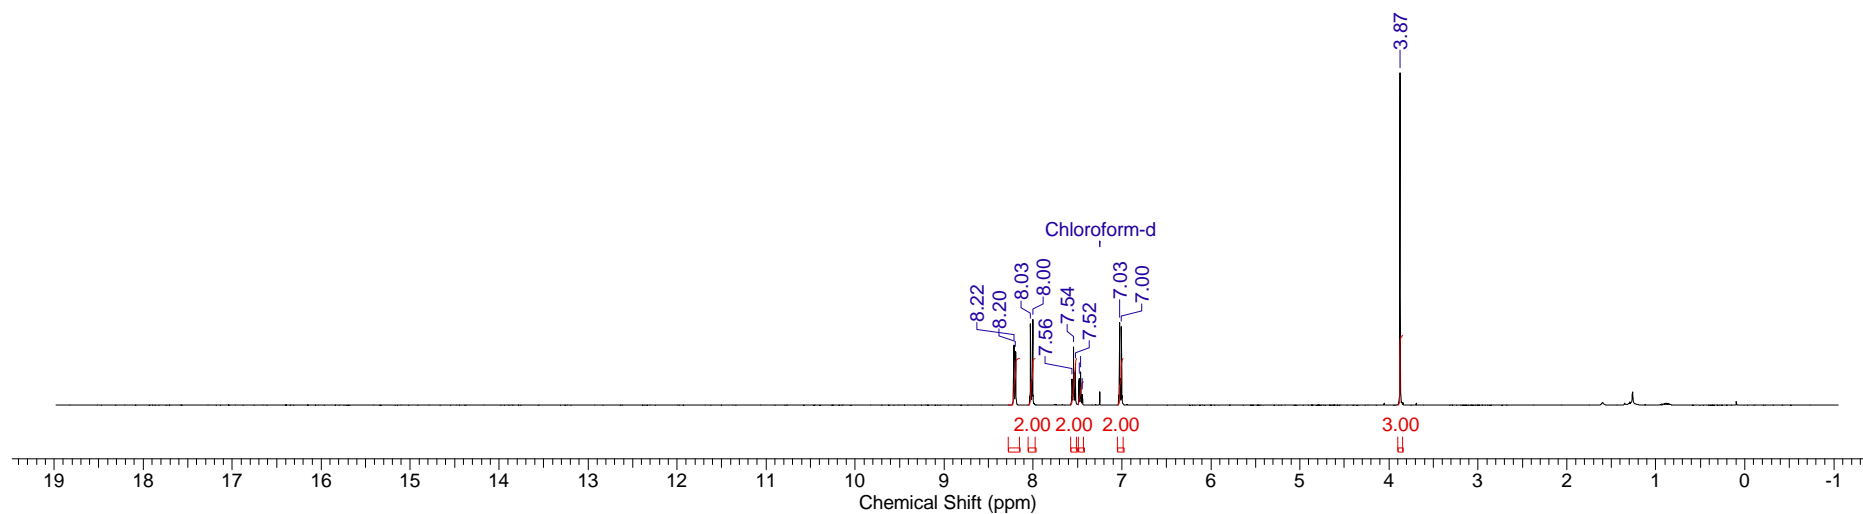<sup>1</sup>H NMR spectrum of **13** (400.1 MHz, CDCl<sub>3</sub>)

|                        |                                                    |                      |                      |                       |        |                  |                      |
|------------------------|----------------------------------------------------|----------------------|----------------------|-----------------------|--------|------------------|----------------------|
| Acquisition Time (sec) | 1.7433                                             | Comment              | Imported from UXNMR. |                       |        | Date             | 15 Oct 2022 22:44:04 |
| File Name              | C:\DOCS\BM\ЯMP_COCE\ДИ\2022\221015\BM-2650_005001r |                      |                      |                       |        | Frequency (MHz)  | 376.50               |
| Nucleus                | 19F                                                | Number of Transients | 16                   | Original Points Count | 131072 | Points Count     | 262144               |
| Pulse Sequence         | zgfgqn                                             | Solvent              | CHLOROFORM-D         |                       |        | Sweep Width (Hz) | 75187.97             |
| Temperature (degree C) | 27.000                                             |                      |                      |                       |        |                  |                      |

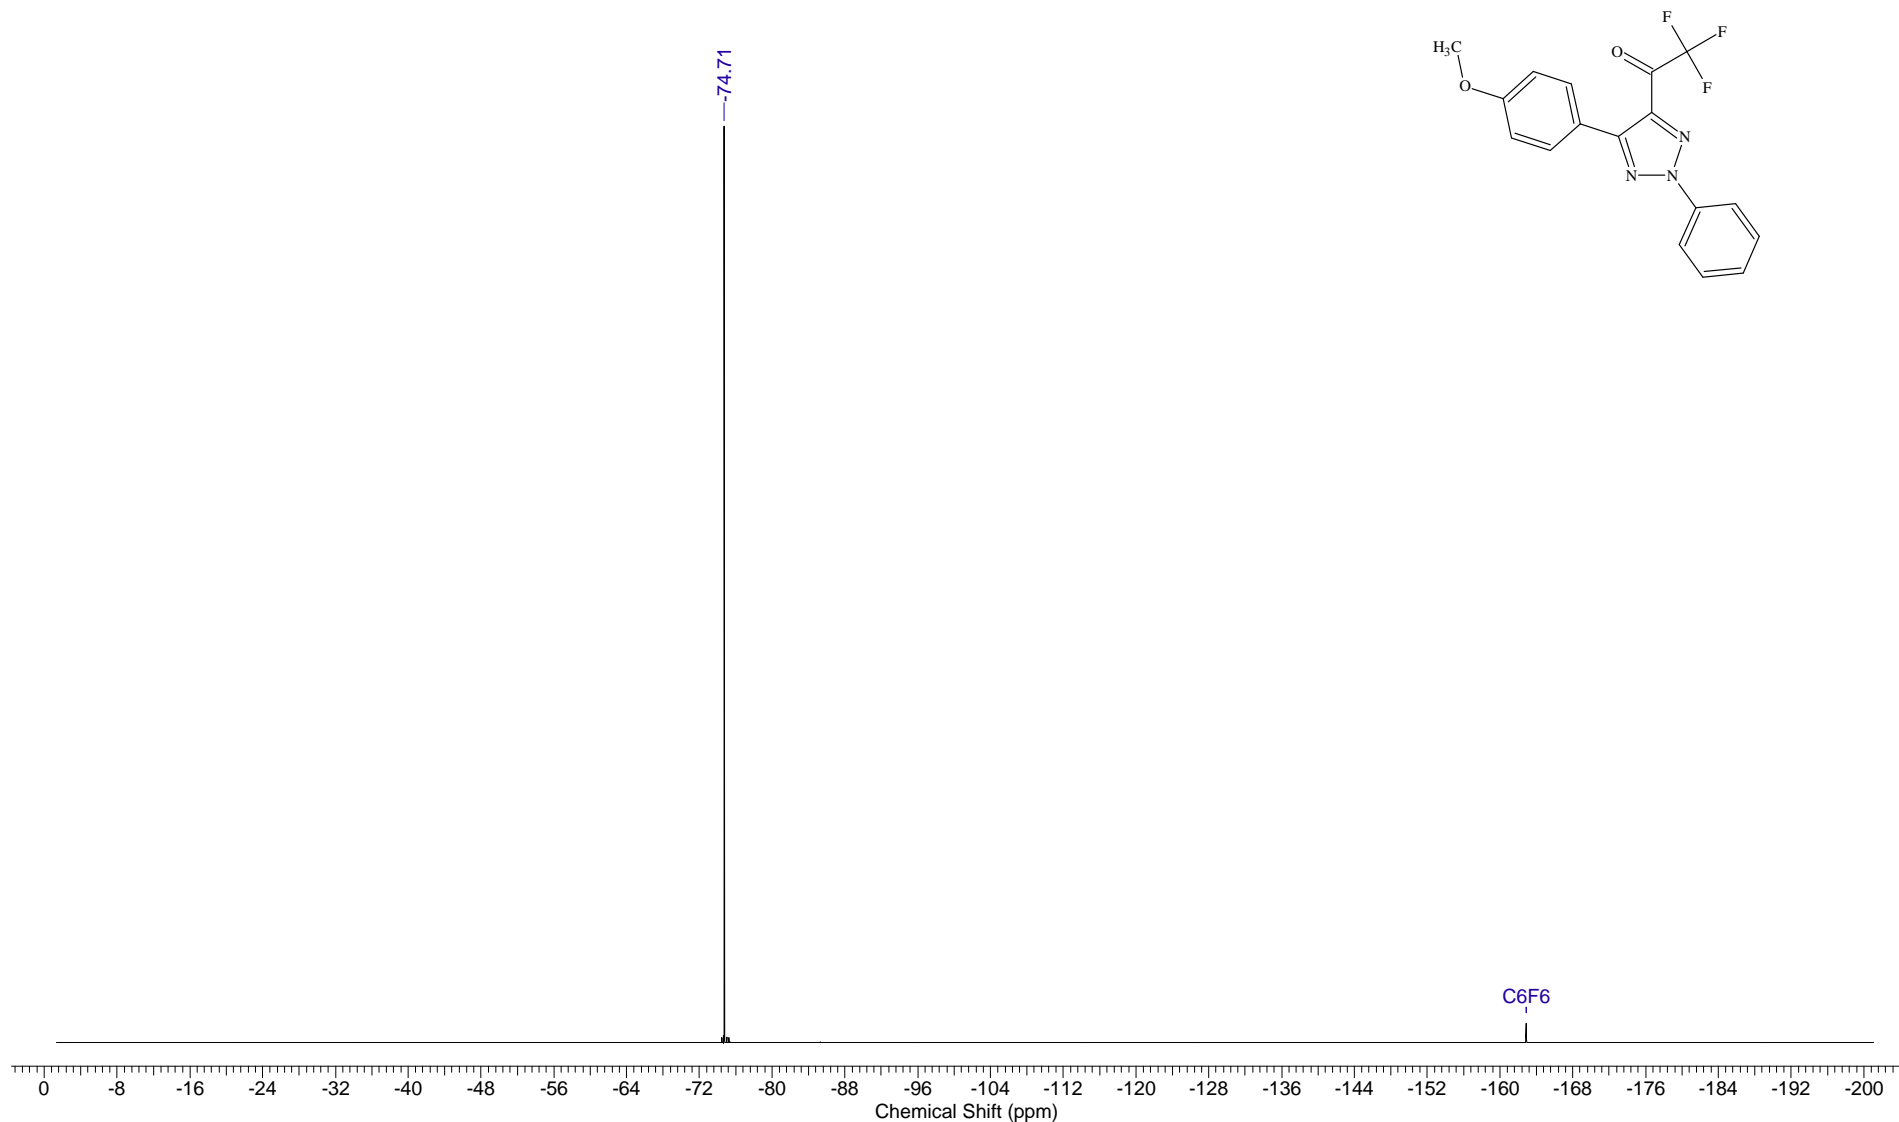

|                               |                                                      |                             |                      |                              |                      |
|-------------------------------|------------------------------------------------------|-----------------------------|----------------------|------------------------------|----------------------|
| <b>Acquisition Time (sec)</b> | 0.6783                                               | <b>Comment</b>              | Imported from UXNMR. | <b>Date</b>                  | 18 Oct 2022 14:48:06 |
| <b>File Name</b>              | C:\DOCS\OUTPUT_301\2022\10.октябрь\BM-2650.C_002001r |                             |                      | <b>Frequency (MHz)</b>       | 100.61               |
| <b>Nucleus</b>                | <sup>13</sup> C                                      | <b>Number of Transients</b> | 273                  | <b>Original Points Count</b> | 16384                |
| <b>Pulse Sequence</b>         | zgpg30                                               | <b>Solvent</b>              | CHLOROFORM-D         | <b>Points Count</b>          | 131072               |
| <b>Temperature (degree C)</b> | 27.000                                               |                             |                      | <b>Sweep Width (Hz)</b>      | 24154.59             |

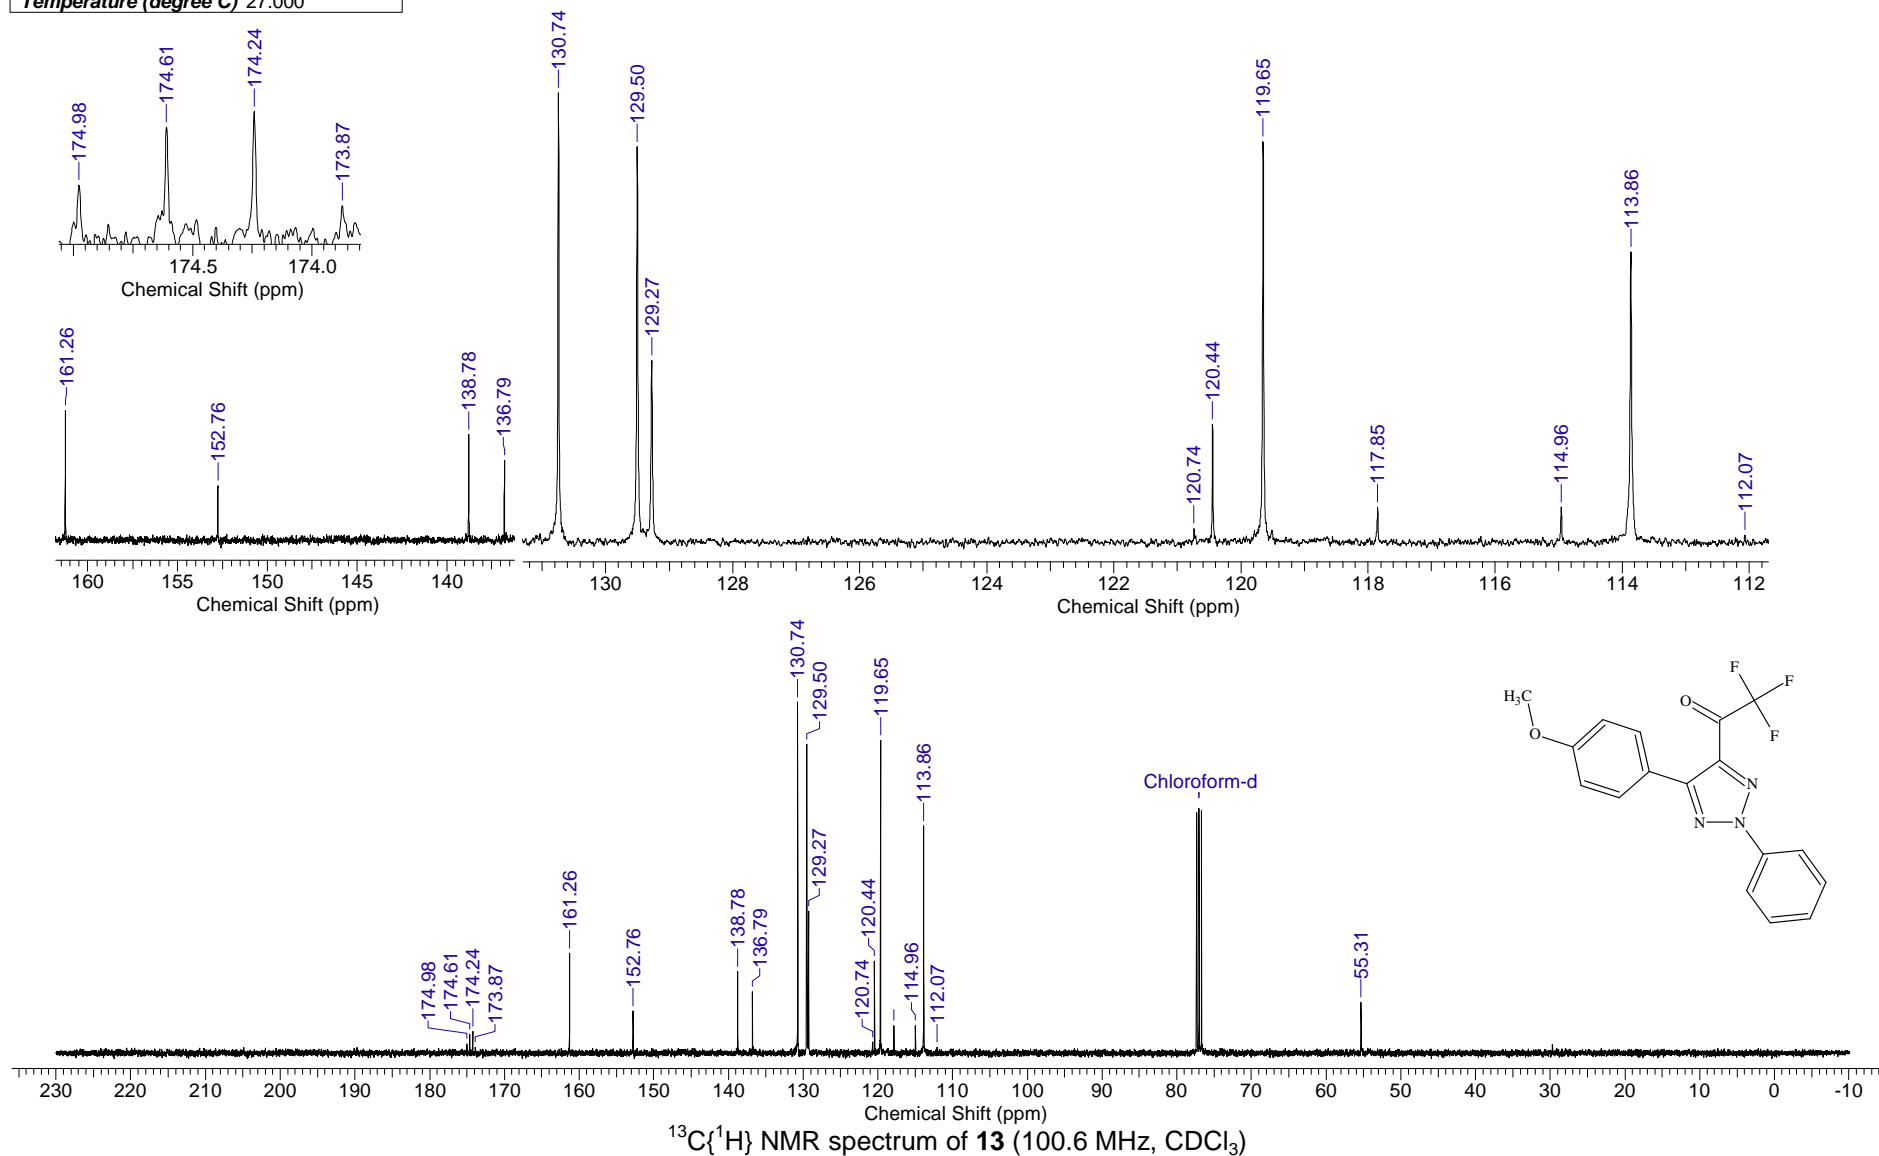

|                        |                                                                     |                      |                      |                       |       |                  |                      |
|------------------------|---------------------------------------------------------------------|----------------------|----------------------|-----------------------|-------|------------------|----------------------|
| Acquisition Time (sec) | 4.0894                                                              | Comment              | Imported from UXNMR. |                       |       | Date             | 14 Nov 2022 15:31:06 |
| File Name              | C:\BM_DATA\DOCS\5ZA-BM-2676-5\5ZA-BM-2676-5\5ZA-BM-2676-5.H_001001r |                      |                      |                       |       | Frequency (MHz)  | 400.13               |
| Nucleus                | 1H                                                                  | Number of Transients | 4                    | Original Points Count | 32768 | Points Count     | 131072               |
| Pulse Sequence         | zg30                                                                | Solvent              | CHLOROFORM-D         |                       |       | Sweep Width (Hz) | 8012.82              |
| Temperature (degree C) | 27.000                                                              |                      |                      |                       |       |                  | H <sub>3</sub> C     |

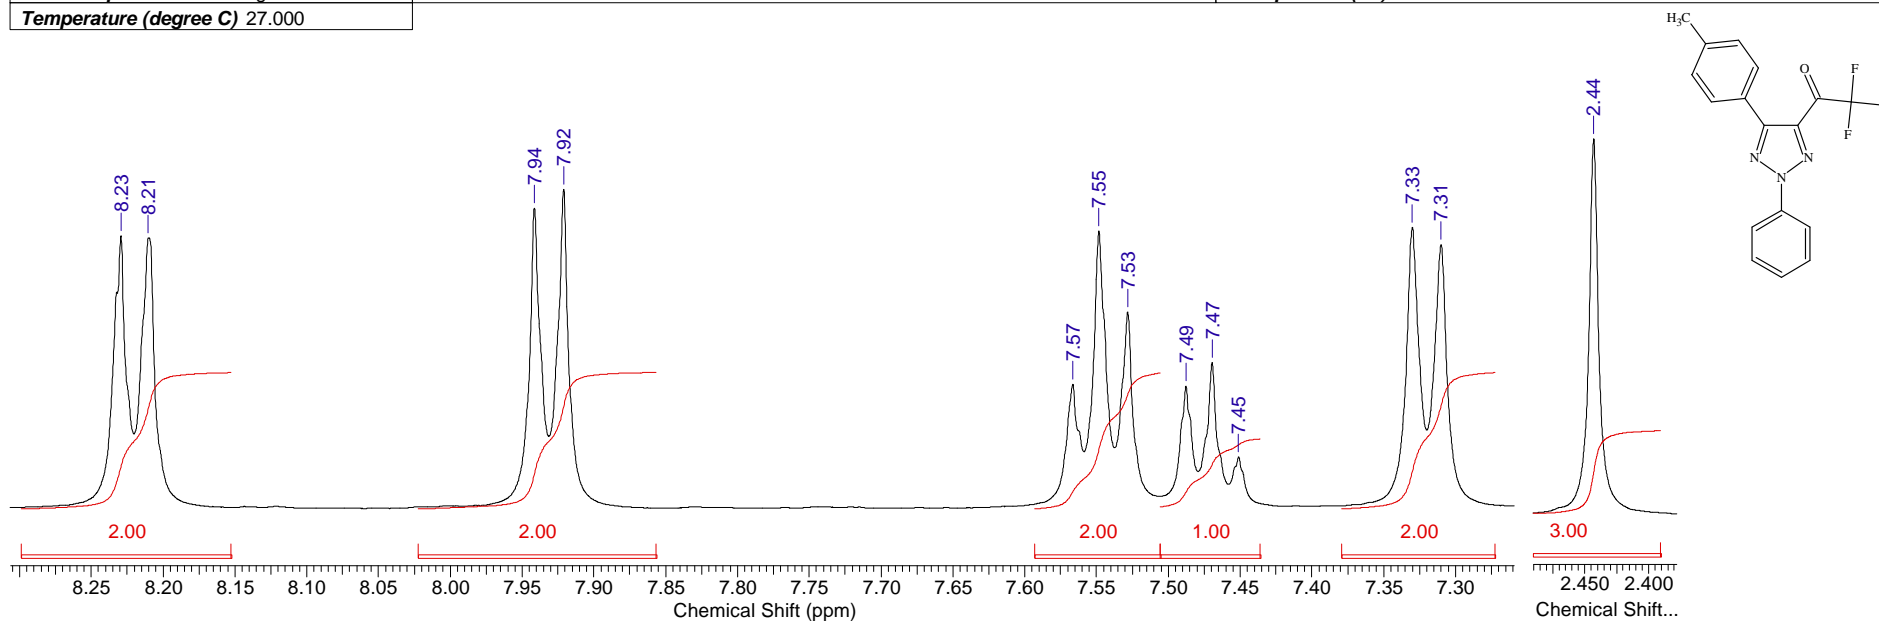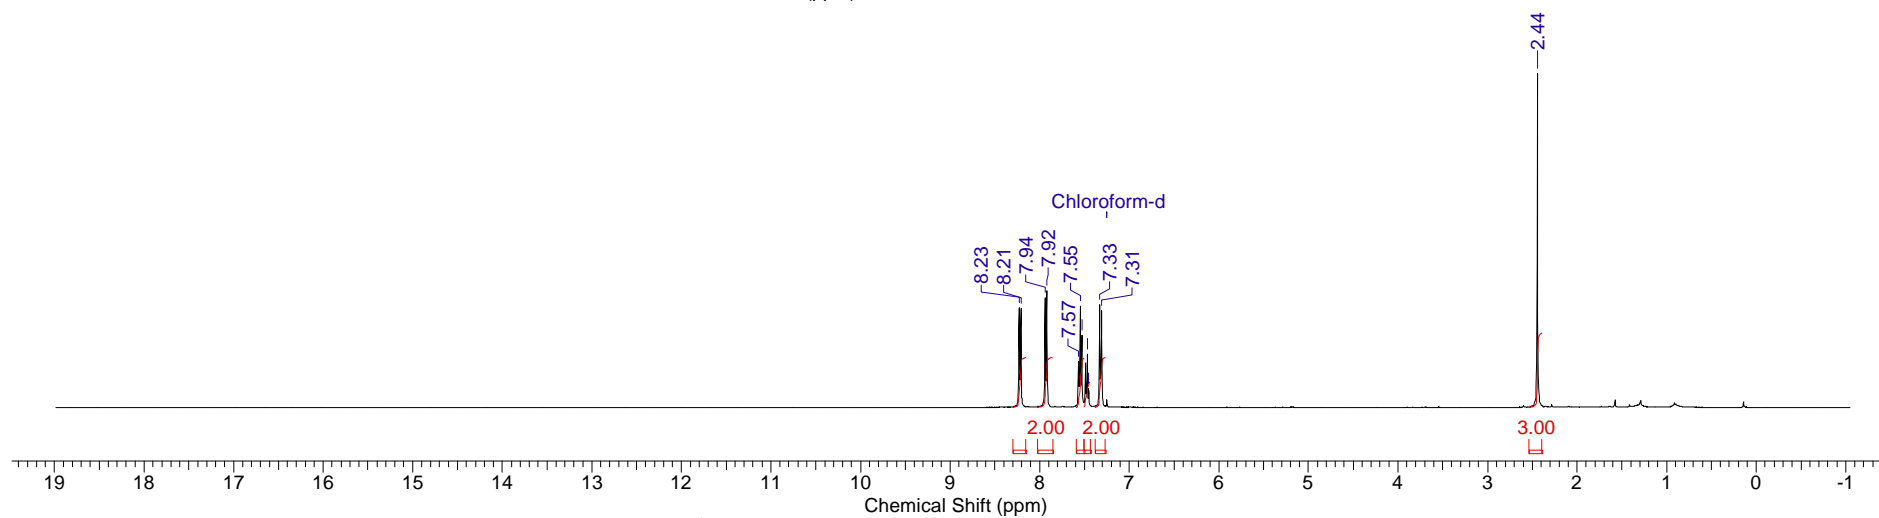<sup>1</sup>H NMR spectrum of **14** (400.1 MHz, CDCl<sub>3</sub>)

|                               |                                                                        |                             |                      |                              |                         |                      |        |
|-------------------------------|------------------------------------------------------------------------|-----------------------------|----------------------|------------------------------|-------------------------|----------------------|--------|
| <b>Acquisition Time (sec)</b> | 1.7433                                                                 | <b>Comment</b>              | Imported from UXNMR. |                              | <b>Date</b>             | 14 Nov 2022 15:44:06 |        |
| <b>File Name</b>              | C:\BM_DATA\DOCS\LSZA-BM-2676-5\LSZA-BM-2676-5\LSZA-BM-2676-5.F_005001r |                             |                      |                              | <b>Frequency (MHz)</b>  | 376.50               |        |
| <b>Nucleus</b>                | 19F                                                                    | <b>Number of Transients</b> | 16                   | <b>Original Points Count</b> | 131072                  | <b>Points Count</b>  | 262144 |
| <b>Pulse Sequence</b>         | zgfgqn                                                                 | <b>Solvent</b>              | CHLOROFORM-D         |                              | <b>Sweep Width (Hz)</b> | 75187.97             |        |
| <b>Temperature (degree C)</b> | 27.000                                                                 |                             |                      |                              |                         |                      |        |

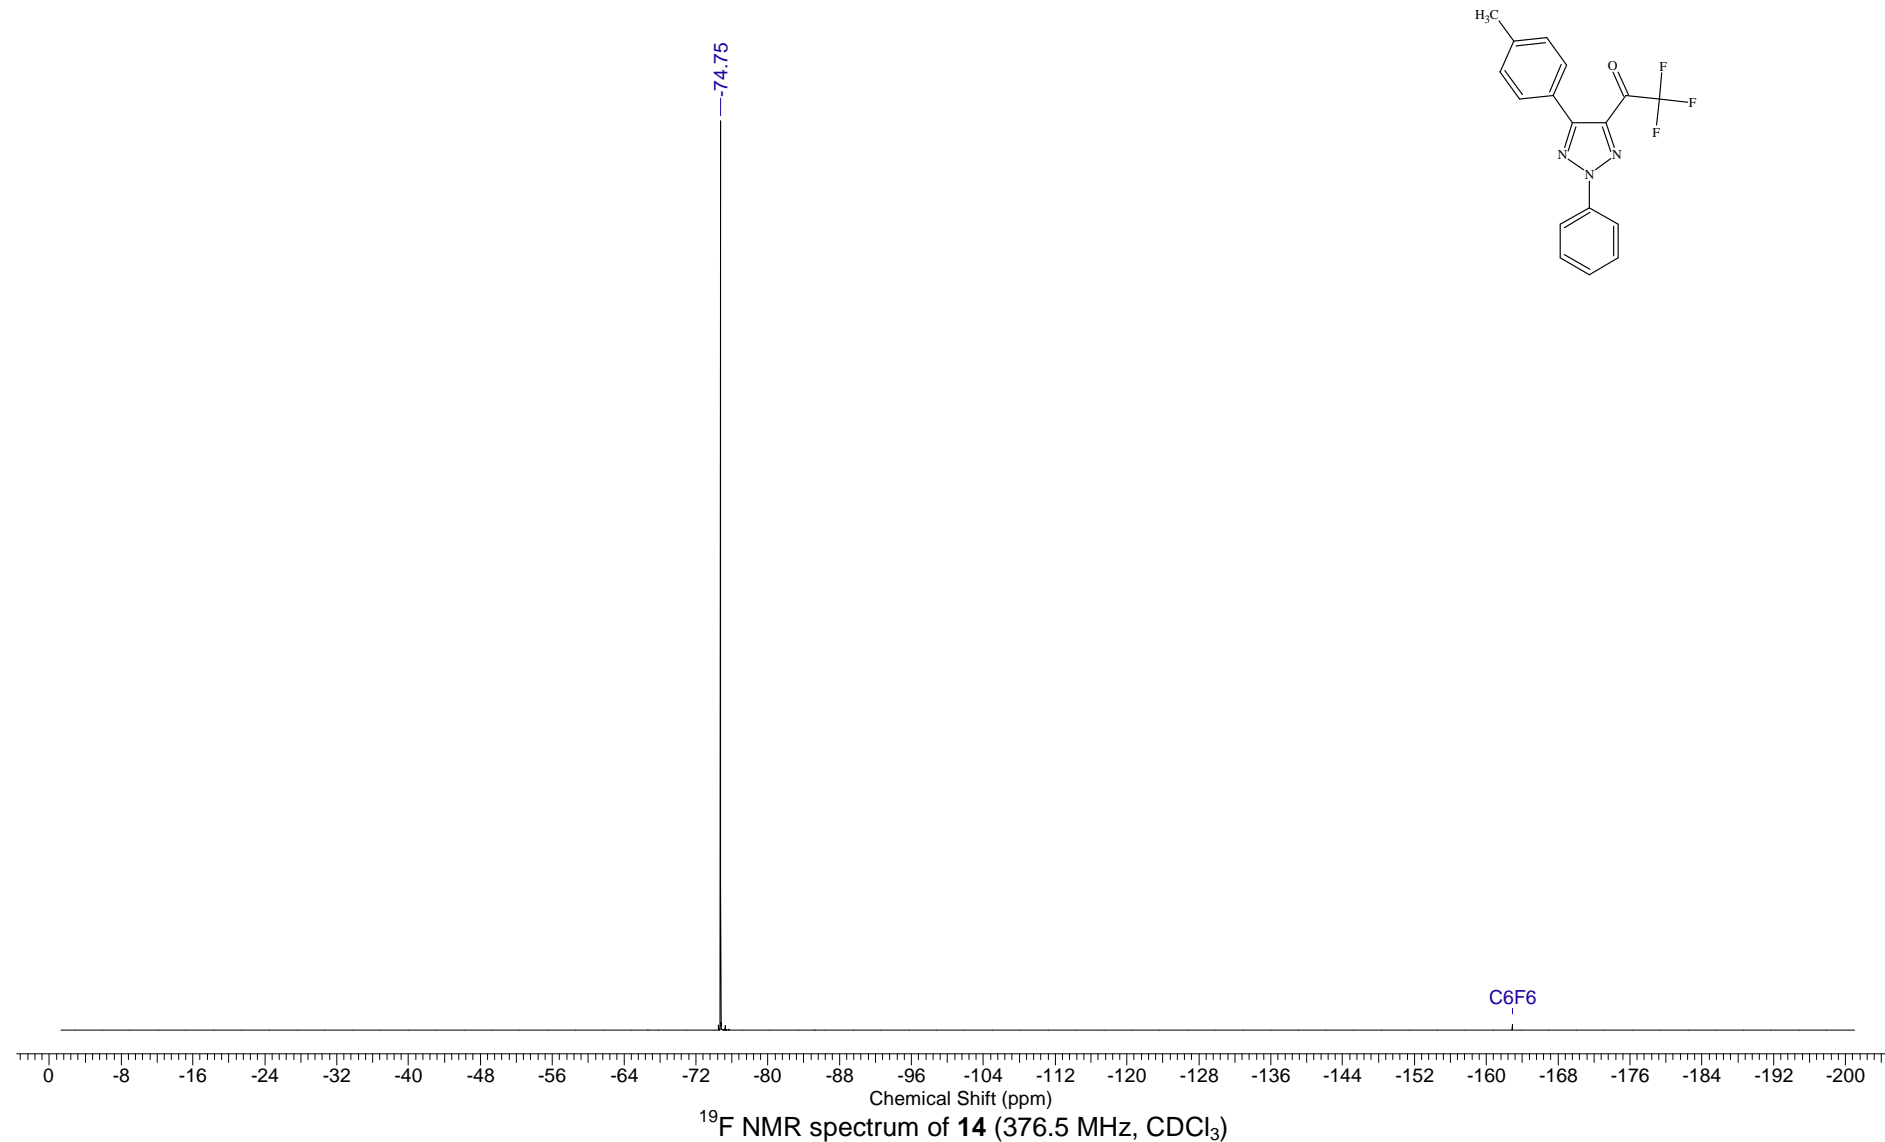

|                        |                                                                     |                      |                      |                       |                  |                      |        |
|------------------------|---------------------------------------------------------------------|----------------------|----------------------|-----------------------|------------------|----------------------|--------|
| Acquisition Time (sec) | 0.6783                                                              | Comment              | Imported from UXNMR. |                       | Date             | 14 Nov 2022 15:40:02 |        |
| File Name              | C:\BM_DATA\DOCS\5ZA-BM-2676-5\5ZA-BM-2676-5\5ZA-BM-2676-5.C_002001r |                      |                      |                       | Frequency (MHz)  | 100.61               |        |
| Nucleus                | 13C                                                                 | Number of Transients | 180                  | Original Points Count | 16384            | Points Count         | 131072 |
| Pulse Sequence         | zgpg30                                                              | Solvent              | DEUTERIUM OXIDE      |                       | Sweep Width (Hz) | 24154.59             |        |
| Temperature (degree C) | 27.000                                                              |                      |                      |                       |                  |                      |        |

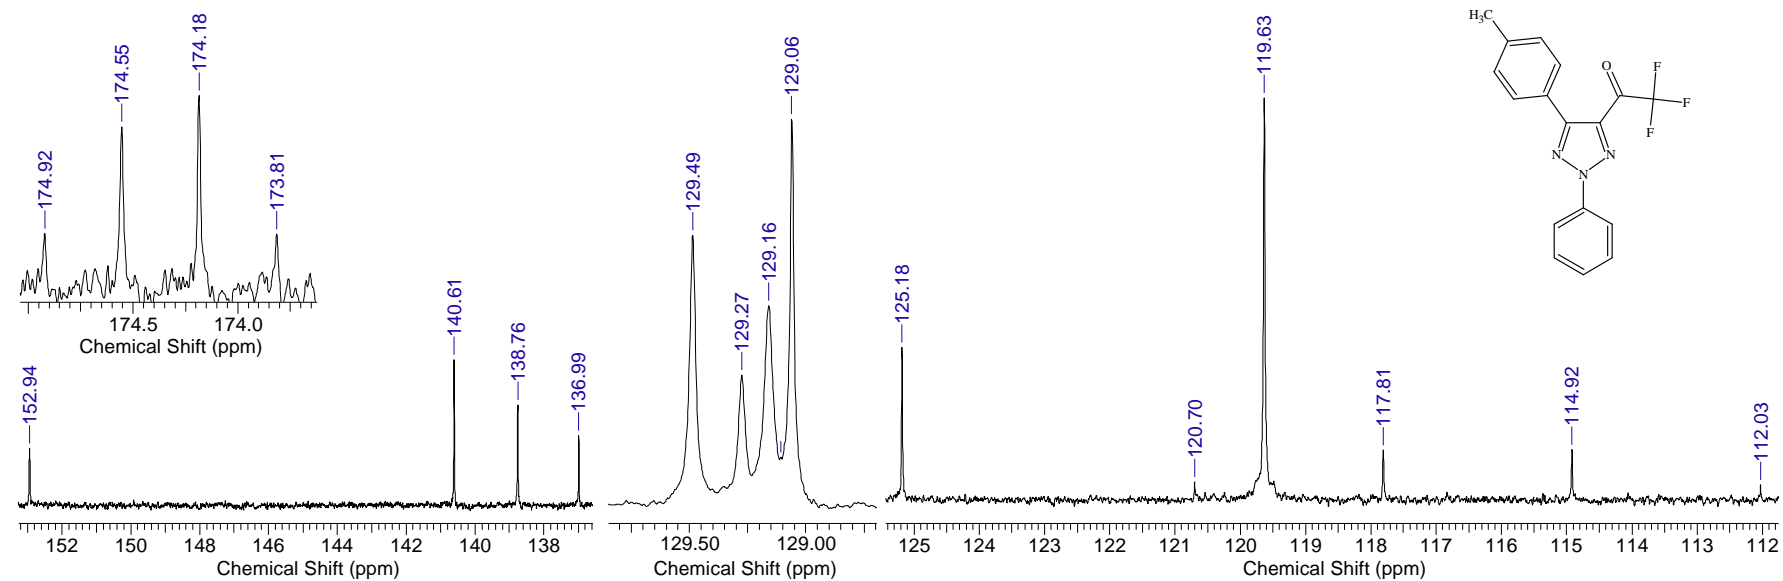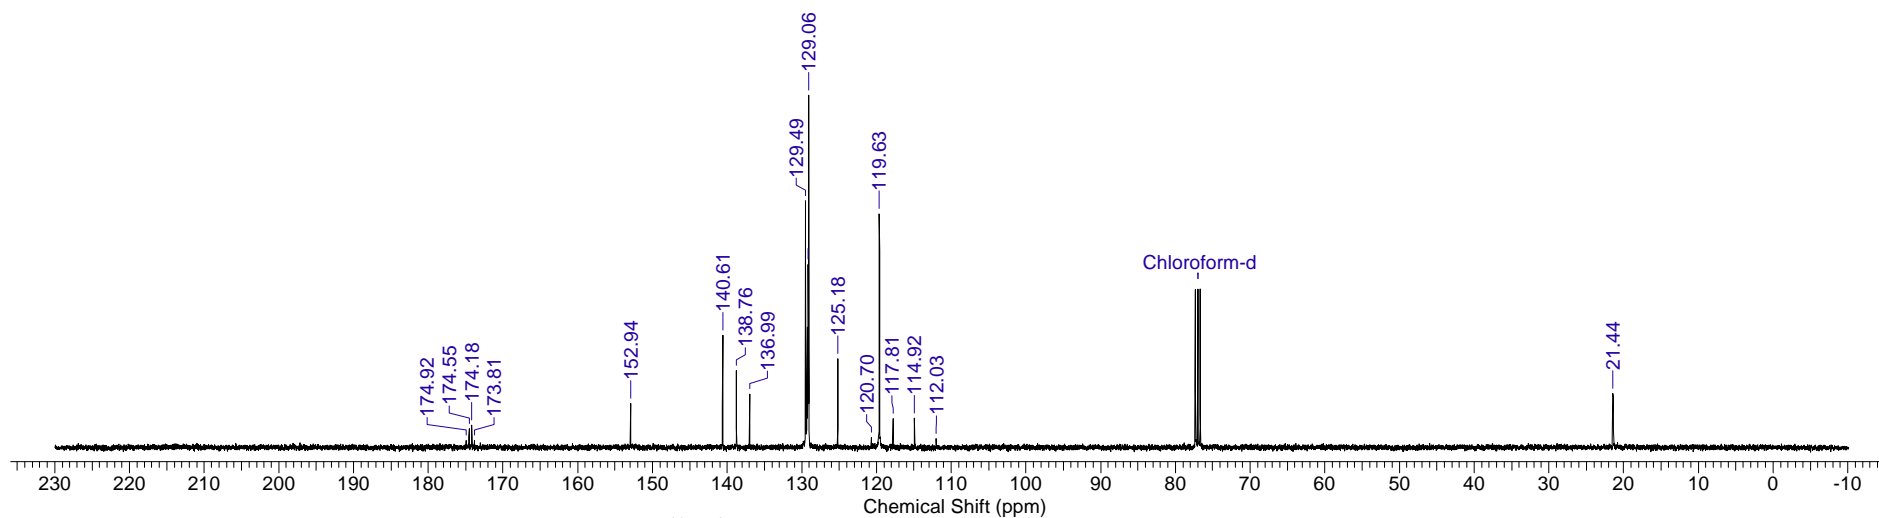 $^{13}\text{C}\{^1\text{H}\}$  NMR spectrum of **14** (100.6 MHz,  $\text{CDCl}_3$ )

|                        |                                                               |                      |                      |                       |                  |                      |        |
|------------------------|---------------------------------------------------------------|----------------------|----------------------|-----------------------|------------------|----------------------|--------|
| Acquisition Time (sec) | 4.0894                                                        | Comment              | Imported from UXNMR. |                       | Date             | 15 Nov 2022 14:46:50 |        |
| File Name              | G:\DISK_ULTRA\SPEC_H,C_2022\11.ноябрь\SZA-BM-2677-9.H_001001r |                      |                      |                       | Frequency (MHz)  | 400.13               |        |
| Nucleus                | 1H                                                            | Number of Transients | 4                    | Original Points Count | 32768            | Points Count         | 131072 |
| Pulse Sequence         | zg30                                                          | Solvent              | CHLOROFORM-D         |                       | Sweep Width (Hz) | 8012.82              |        |
| Temperature (degree C) | 27.000                                                        |                      |                      |                       |                  |                      |        |

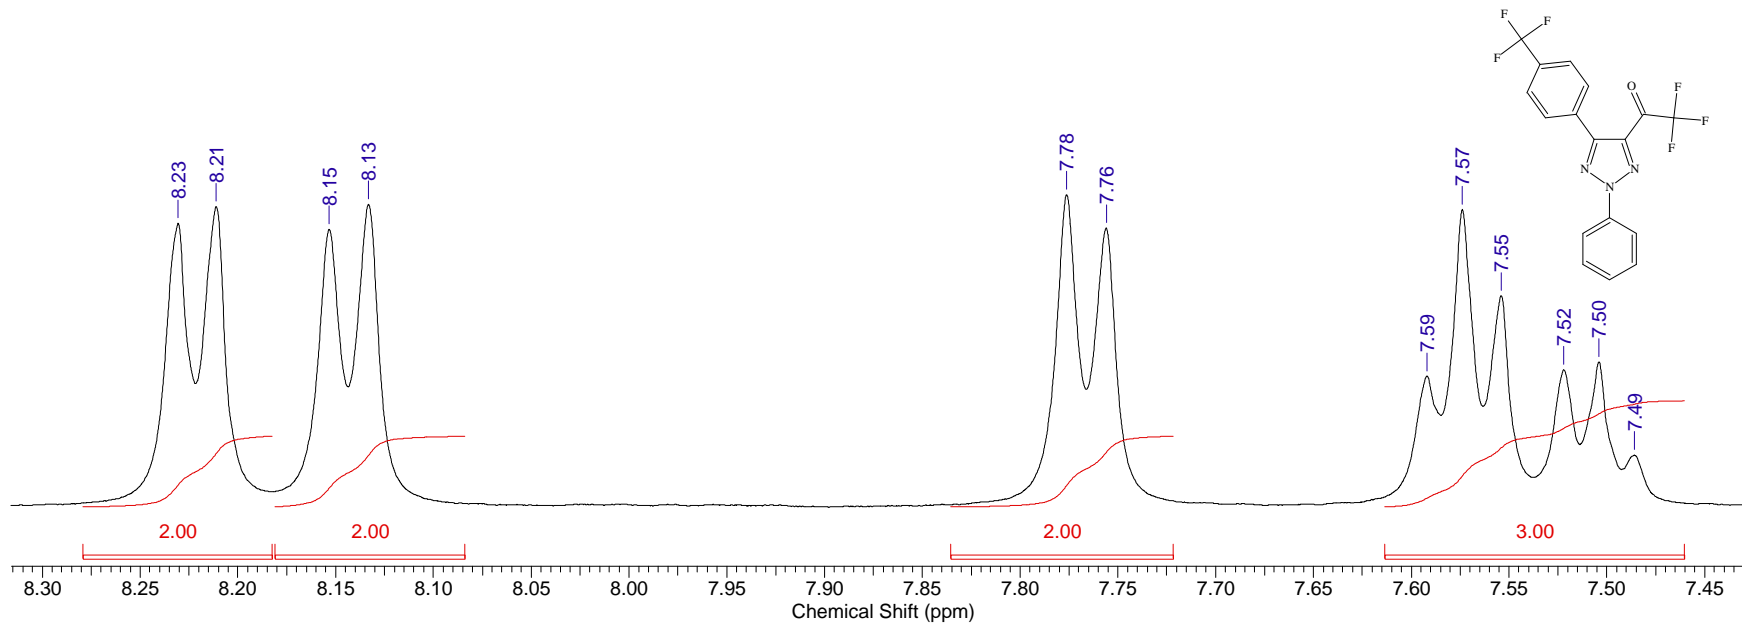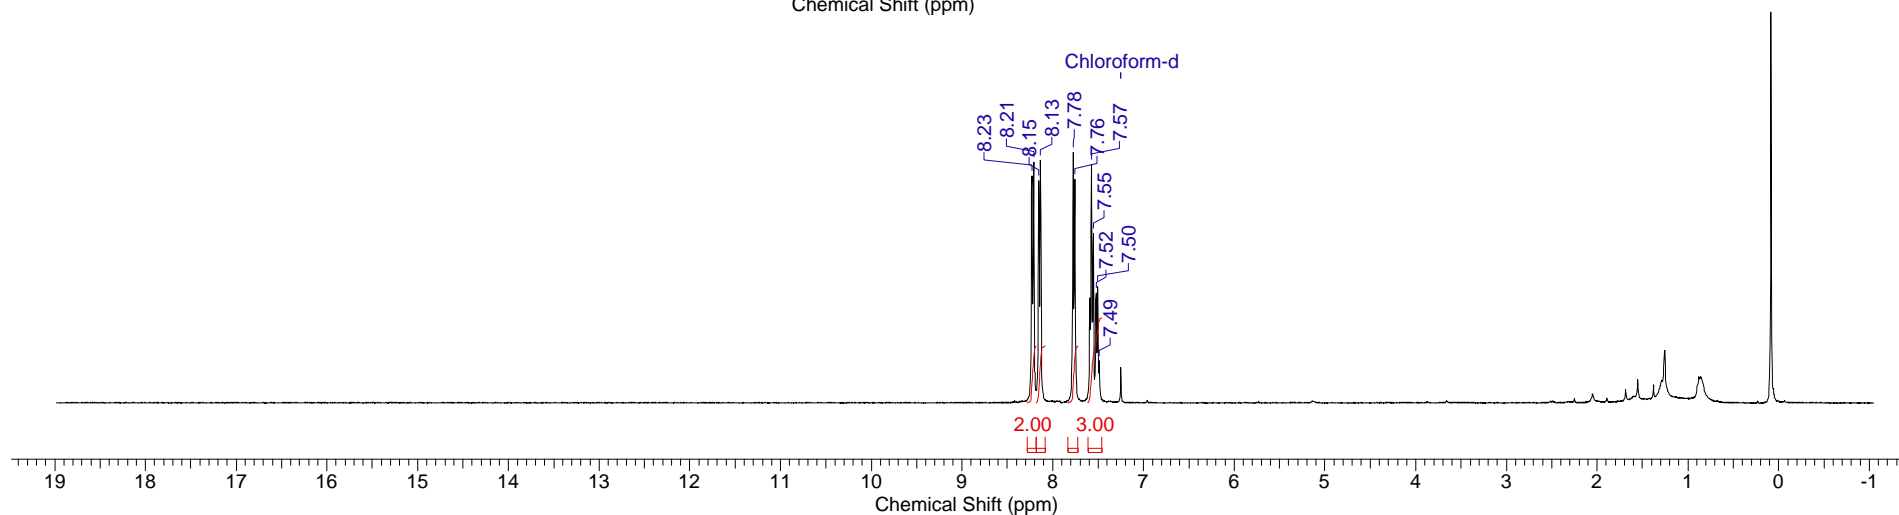<sup>1</sup>H NMR spectrum of **15** (400.1 MHz, CDCl<sub>3</sub>)

|                        |                                                               |                      |  |              |                       |  |                  |                      |          |
|------------------------|---------------------------------------------------------------|----------------------|--|--------------|-----------------------|--|------------------|----------------------|----------|
| Acquisition Time (sec) | 1.7433                                                        | Comment              |  |              | Imported from UXNMR.  |  | Date             | 15 Nov 2022 15:01:52 |          |
| File Name              | G:\DISK_ULTRA\SPEC_H,C_2022\11.ноябрь\SZA-BM-2677-9.F_005001r |                      |  |              |                       |  | Frequency (MHz)  | 376.50               |          |
| Nucleus                | 19F                                                           | Number of Transients |  | 16           | Original Points Count |  | 131072           | Points Count         | 262144   |
| Pulse Sequence         | zgfgqn                                                        | Solvent              |  | CHLOROFORM-D |                       |  | Sweep Width (Hz) |                      | 75187.97 |
| Temperature (degree C) | 27.000                                                        |                      |  |              |                       |  |                  |                      |          |

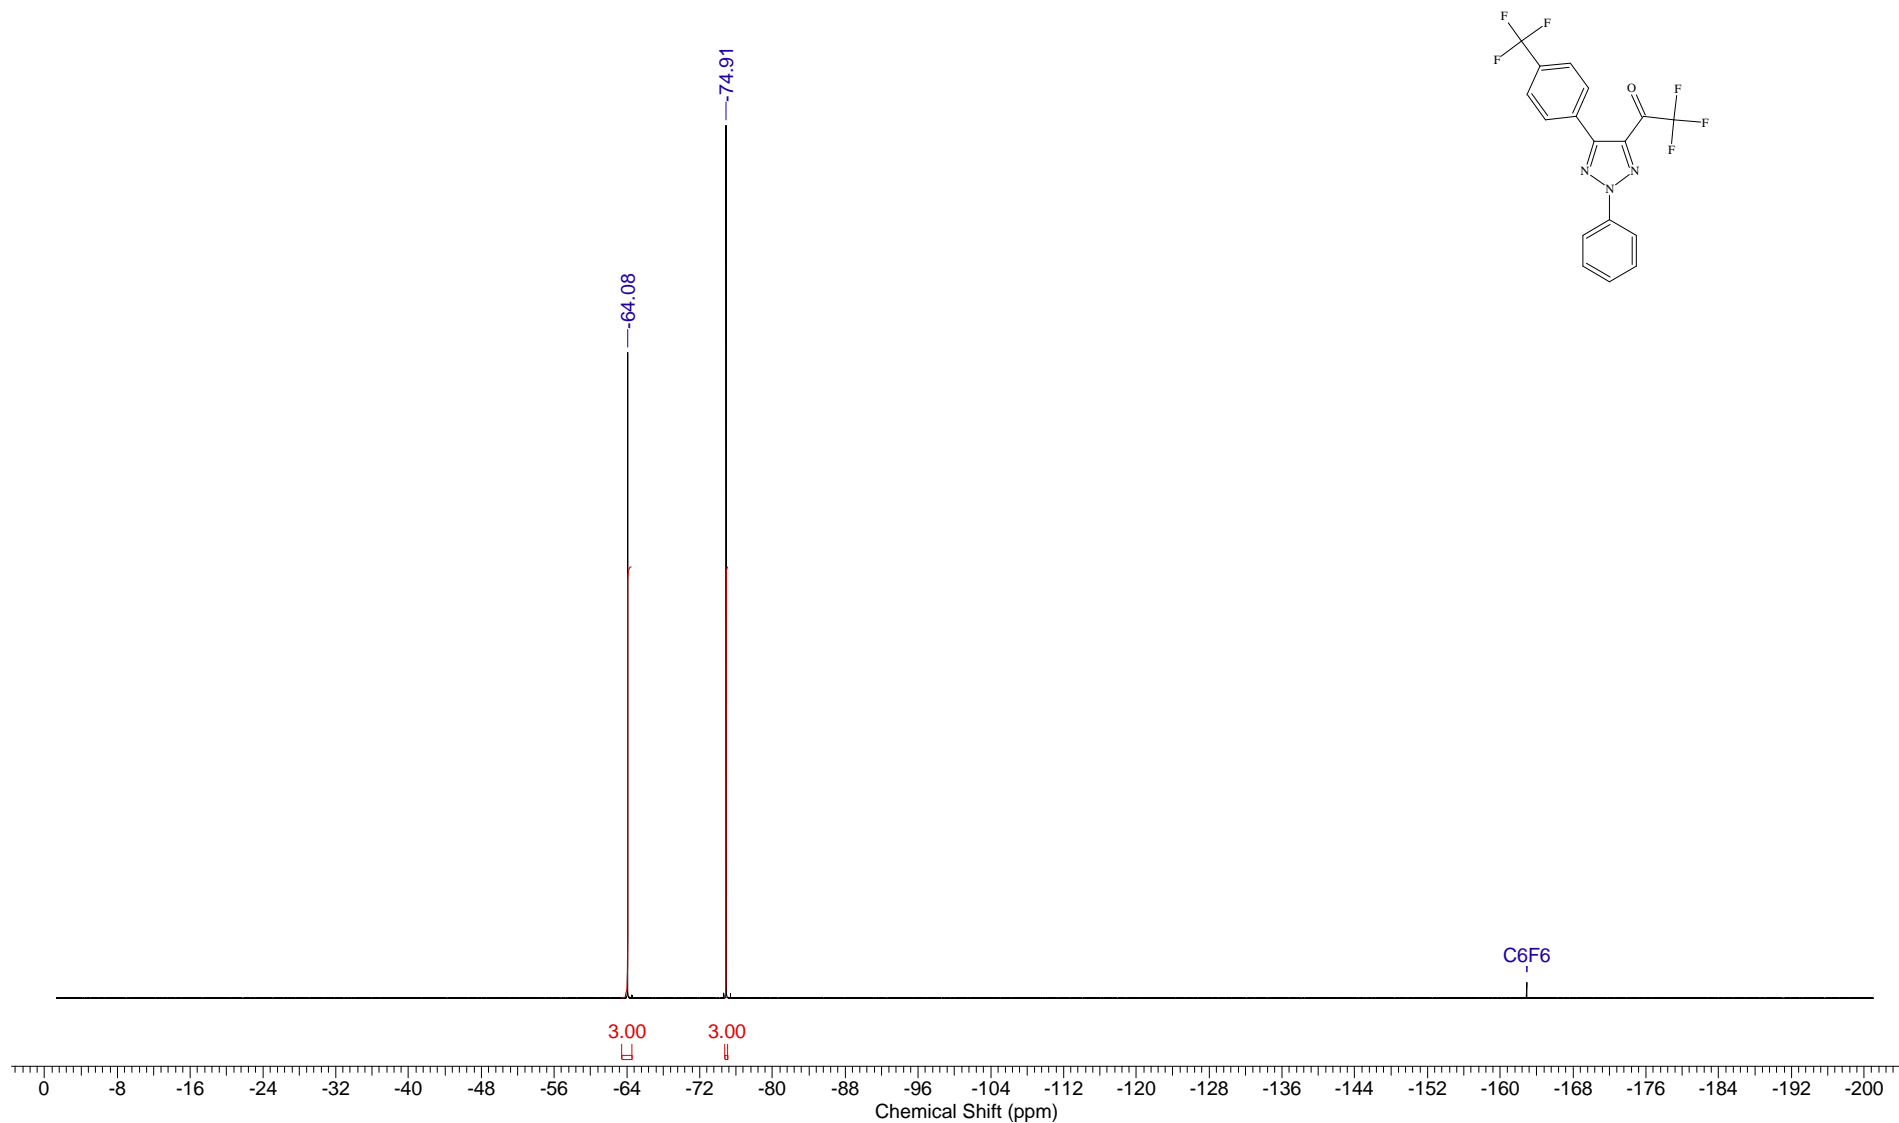<sup>19</sup>F NMR spectrum of **15** (376.5 MHz, CDCl<sub>3</sub>)



|                        |                                                              |                      |                      |                       |                  |                      |        |
|------------------------|--------------------------------------------------------------|----------------------|----------------------|-----------------------|------------------|----------------------|--------|
| Acquisition Time (sec) | 0.6783                                                       | Comment              | Imported from UXNMR. |                       | Date             | 15 Nov 2022 14:57:30 |        |
| File Name              | G:\DISK_ULTRA\SPEC_H.C_2022\11.ноябрь\SA-BM-2677-9.C_002001r |                      |                      |                       | Frequency (MHz)  | 100.61               |        |
| Nucleus                | 13C                                                          | Number of Transients | 257                  | Original Points Count | 16384            | Points Count         | 131072 |
| Pulse Sequence         | zgpg30                                                       | Solvent              | DEUTERIUM OXIDE      |                       | Sweep Width (Hz) | 24154.59             |        |
| Temperature (degree C) | 27.000                                                       |                      |                      |                       |                  |                      |        |

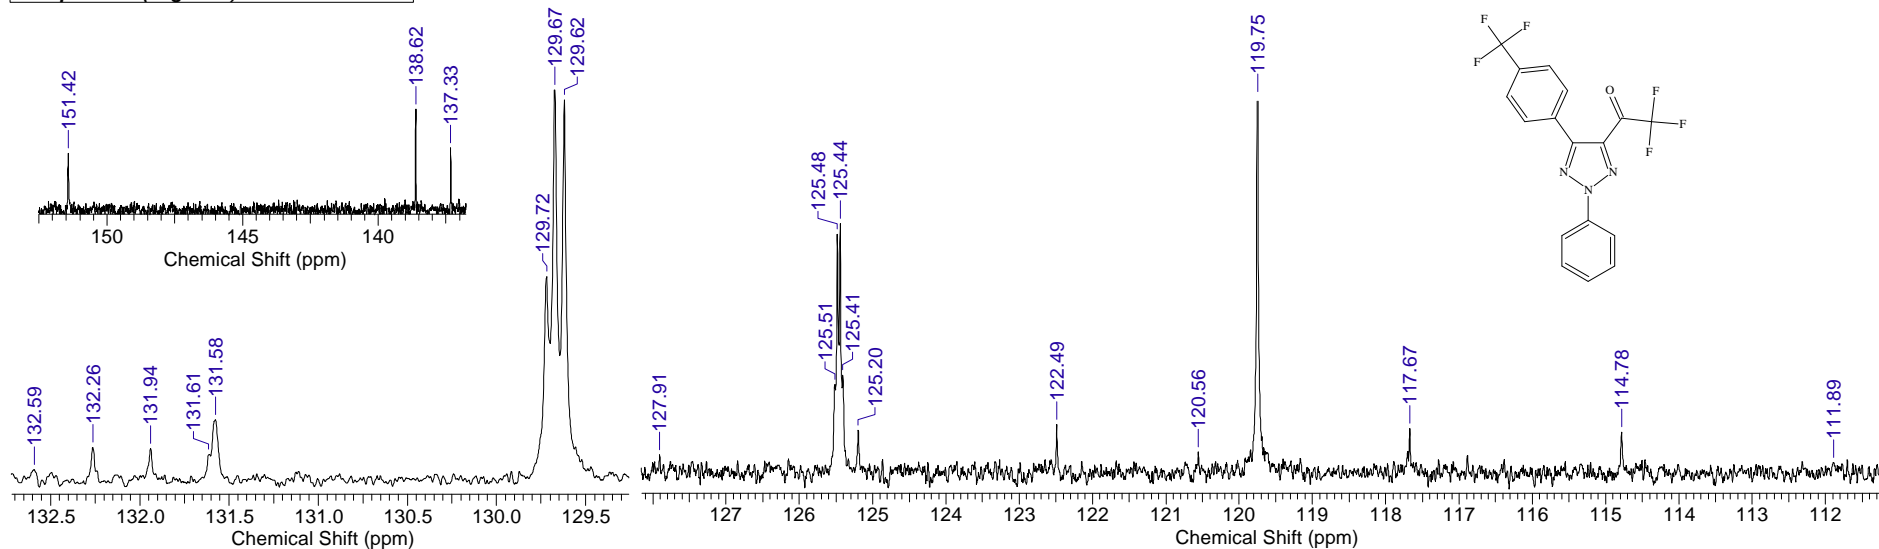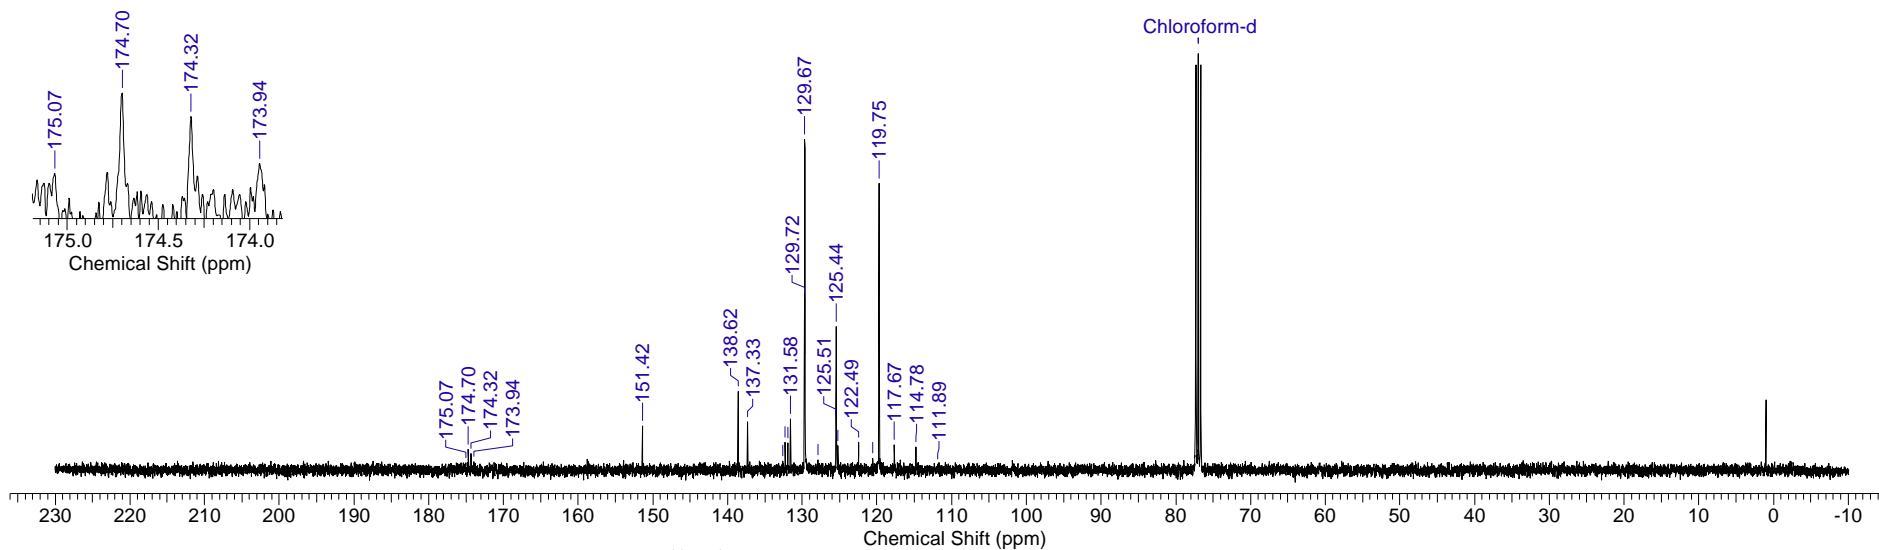<sup>13</sup>C{<sup>1</sup>H} NMR spectrum of **15** (100.6 MHz, CDCl<sub>3</sub>)

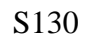

|                        |                                                      |                      |                      |                       |                 |                        |        |
|------------------------|------------------------------------------------------|----------------------|----------------------|-----------------------|-----------------|------------------------|--------|
| Acquisition Time (sec) | 1.7433                                               | Comment              | Imported from UXMNR. |                       | Date            | 20 Oct 2022 12:15:18   |        |
| File Name              | C:\DOCS\OUTPUT_301\2022\10.октябрь\BM-2655.F_005001r |                      |                      |                       | Frequency (MHz) | 376.50                 |        |
| Nucleus                | 19F                                                  | Number of Transients | 16                   | Original Points Count | 131072          | Points Count           | 262144 |
| Pulse Sequence         | zgfgqn                                               | Solvent              | BENZENE-D6           | Sweep Width (Hz)      | 75187.97        | Temperature (degree C) | 27.000 |

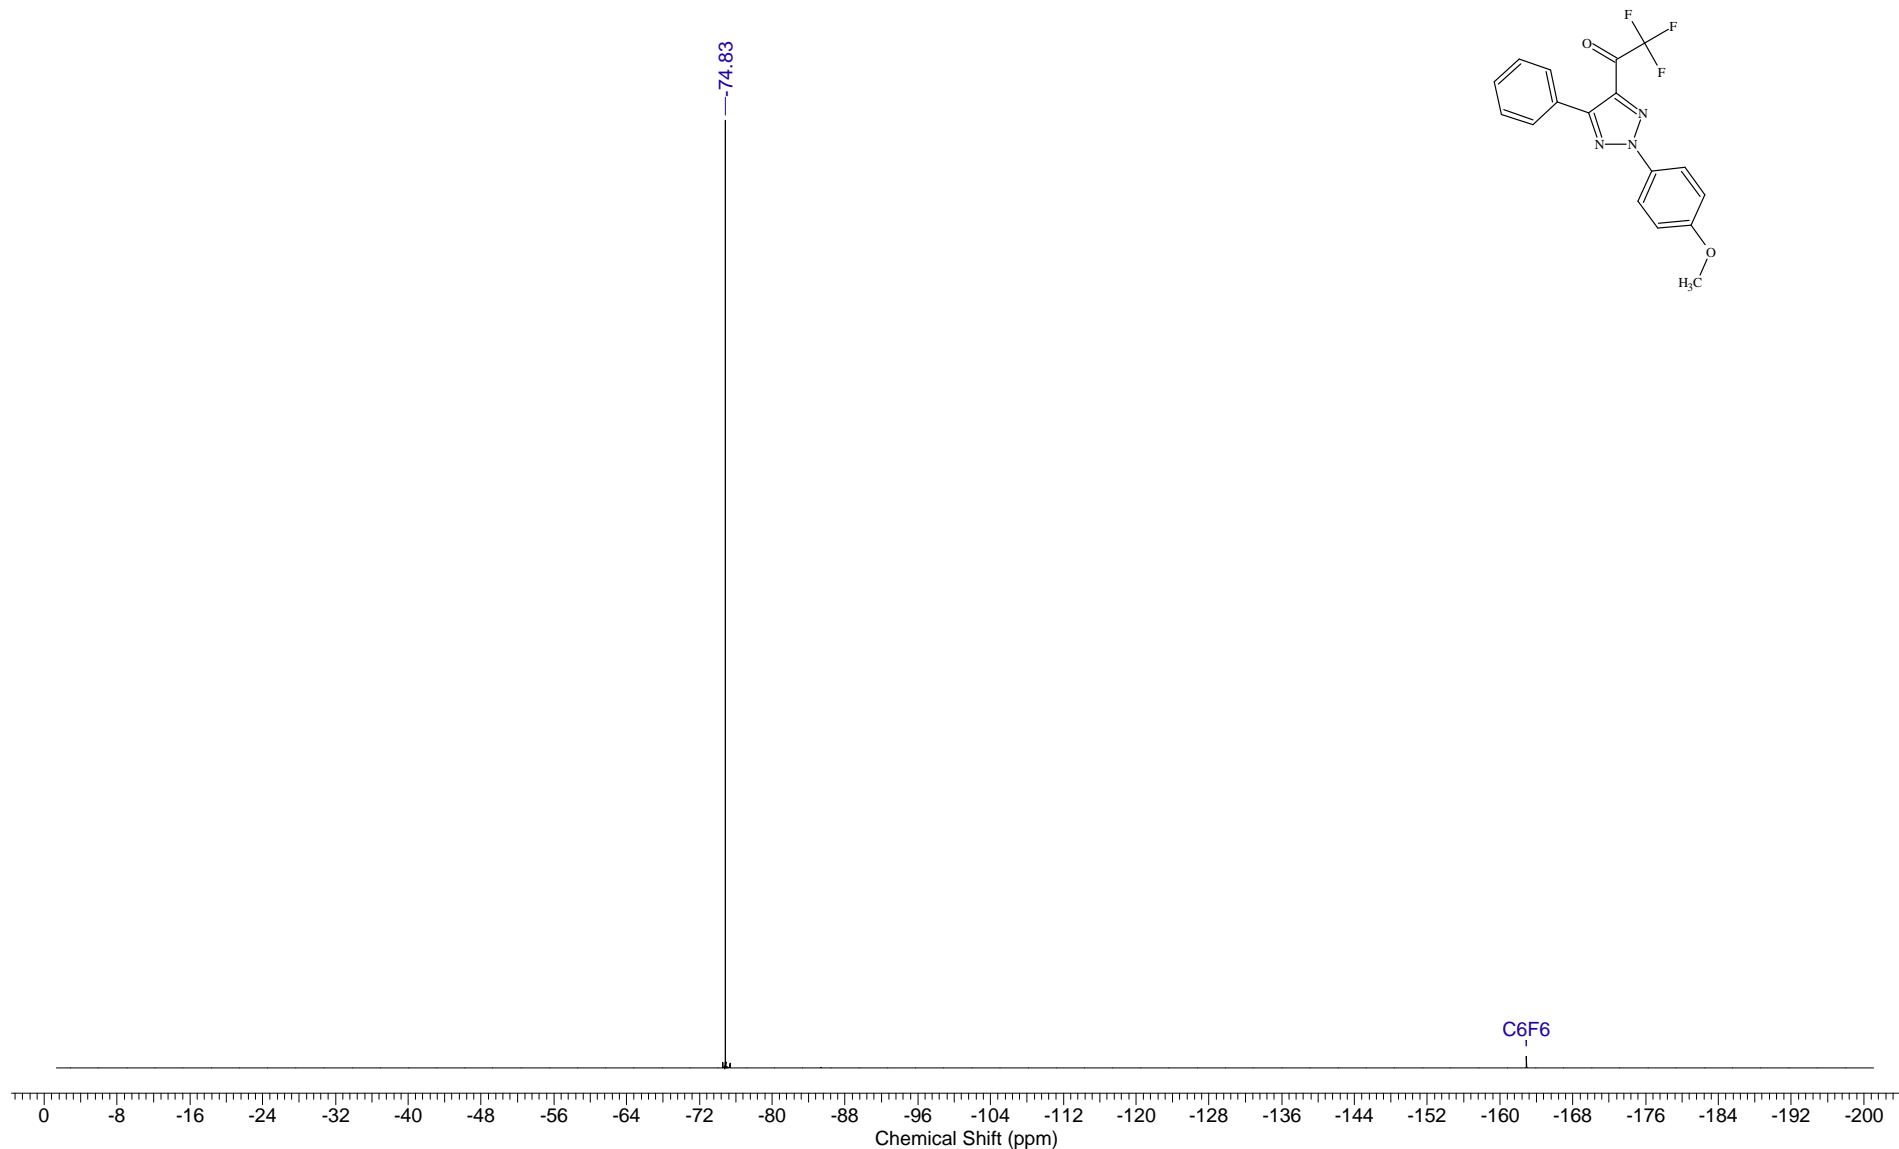<sup>19</sup>F NMR spectrum of **16** (376.5 MHz, CDCl<sub>3</sub>)

S131

|                        |                                                      |                      |                      |                       |                 |                        |        |
|------------------------|------------------------------------------------------|----------------------|----------------------|-----------------------|-----------------|------------------------|--------|
| Acquisition Time (sec) | 0.6783                                               | Comment              | Imported from UXNMR. |                       | Date            | 20 Oct 2022 12:09:26   |        |
| File Name              | C:\DOCS\OUTPUT_301\2022\10.октябрь\BM-2655.C_002001r |                      |                      |                       | Frequency (MHz) | 100.61                 |        |
| Nucleus                | 13C                                                  | Number of Transients | 190                  | Original Points Count | 16384           | Points Count           | 131072 |
| Pulse Sequence         | zpgq30                                               | Solvent              | DMSO-D6              | Sweep Width (Hz)      | 24154.59        | Temperature (degree C) | 27.000 |

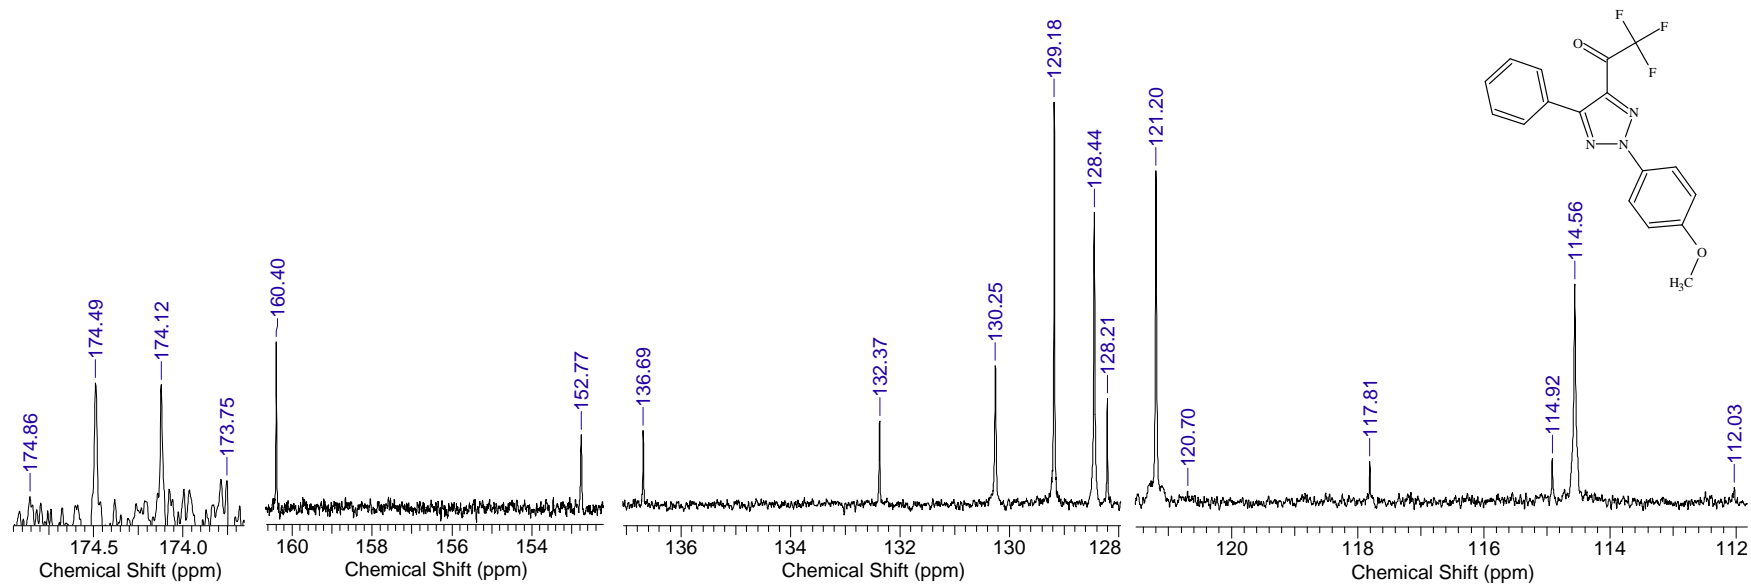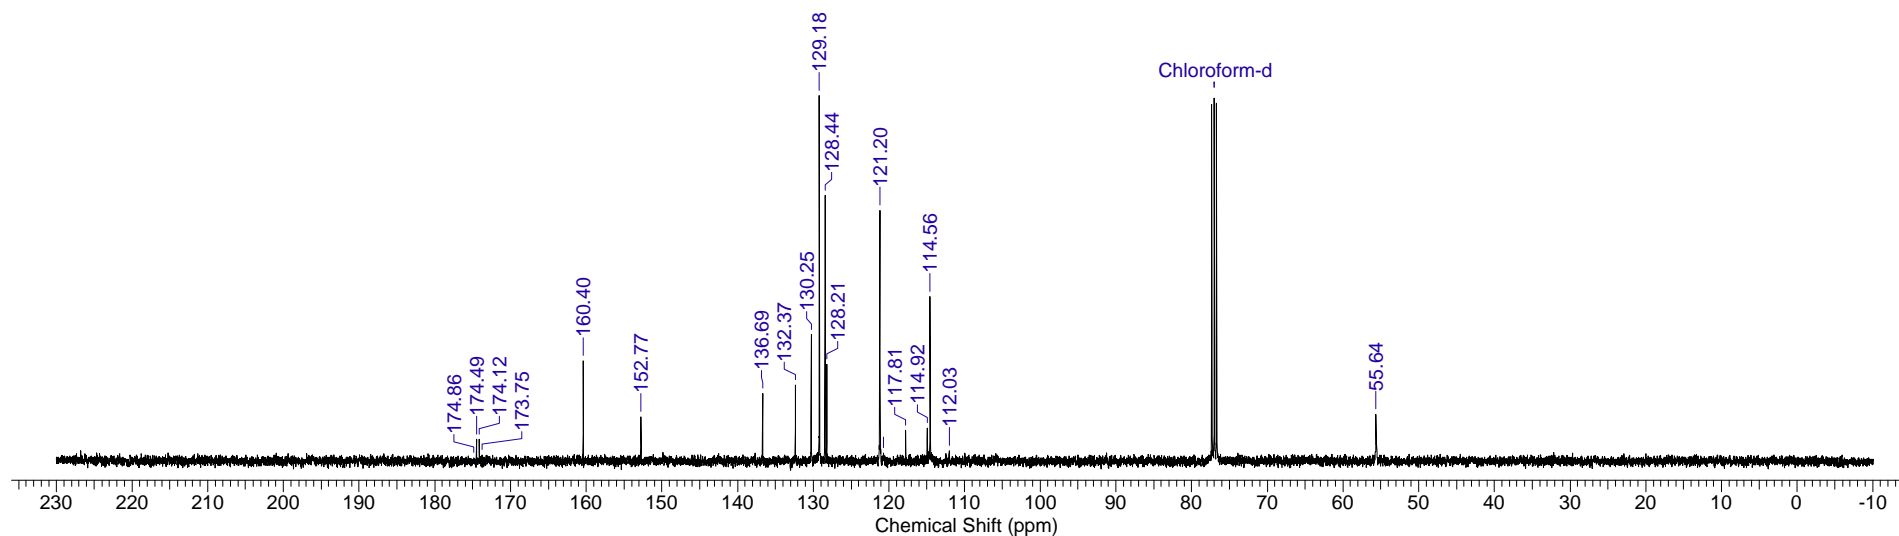<sup>13</sup>C{<sup>1</sup>H} NMR spectrum of **16** (100.6 MHz, CDCl<sub>3</sub>)

|                        |                                                       |                              |              |                       |                  |                      |        |
|------------------------|-------------------------------------------------------|------------------------------|--------------|-----------------------|------------------|----------------------|--------|
| Acquisition Time (sec) | 4.0894                                                | Comment Imported from UXNMR. |              |                       | Date             | 20 Oct 2022 23:52:48 |        |
| File Name              | C:\DOCS\BM\MP_COSEДИ\2022\bm221020\BM-2656-2p_001001r |                              |              |                       | Frequency (MHz)  | 400.13               |        |
| Nucleus                | 1H                                                    | Number of Transients         | 8            | Original Points Count | 32768            | Points Count         | 131072 |
| Pulse Sequence         | zg30                                                  | Solvent                      | CHLOROFORM-D |                       | Sweep Width (Hz) | 8012.82              |        |
| Temperature (degree C) | 27.000                                                |                              |              |                       |                  |                      |        |

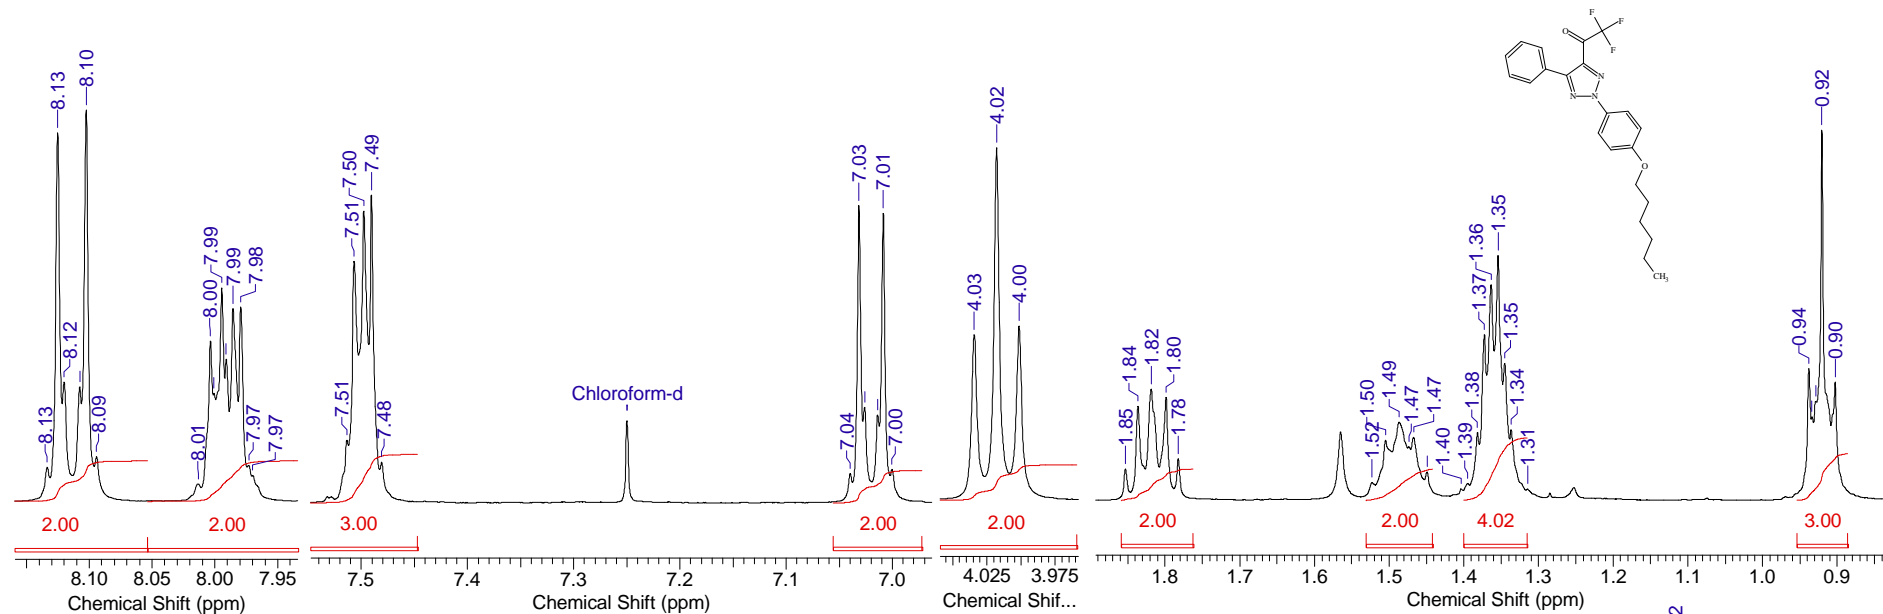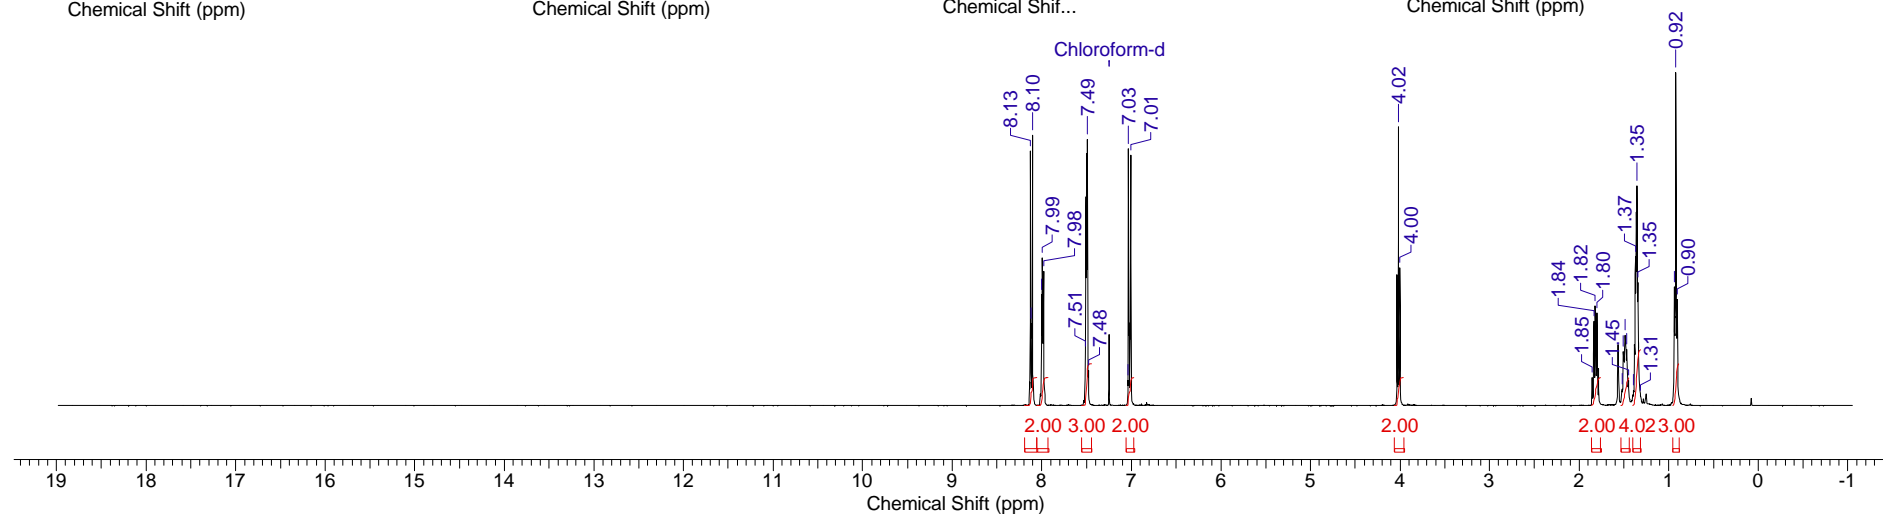<sup>1</sup>H NMR spectrum of 17 (400.1 MHz, CDCl<sub>3</sub>)

|                        |                                                         |                      |                      |                       |                 |                        |        |
|------------------------|---------------------------------------------------------|----------------------|----------------------|-----------------------|-----------------|------------------------|--------|
| Acquisition Time (sec) | 1.7433                                                  | Comment              | Imported from UXMNR. |                       | Date            | 21 Oct 2022 15:57:16   |        |
| File Name              | C:\DOCS\OUTPUT_301\2022\10.октябрь\BM-2656-2p.F_005001r |                      |                      |                       | Frequency (MHz) | 376.50                 |        |
| Nucleus                | 19F                                                     | Number of Transients | 16                   | Original Points Count | 131072          | Points Count           | 262144 |
| Pulse Sequence         | zgfgqn                                                  | Solvent              | BENZENE-D6           | Sweep Width (Hz)      | 75187.97        | Temperature (degree C) | 27.000 |

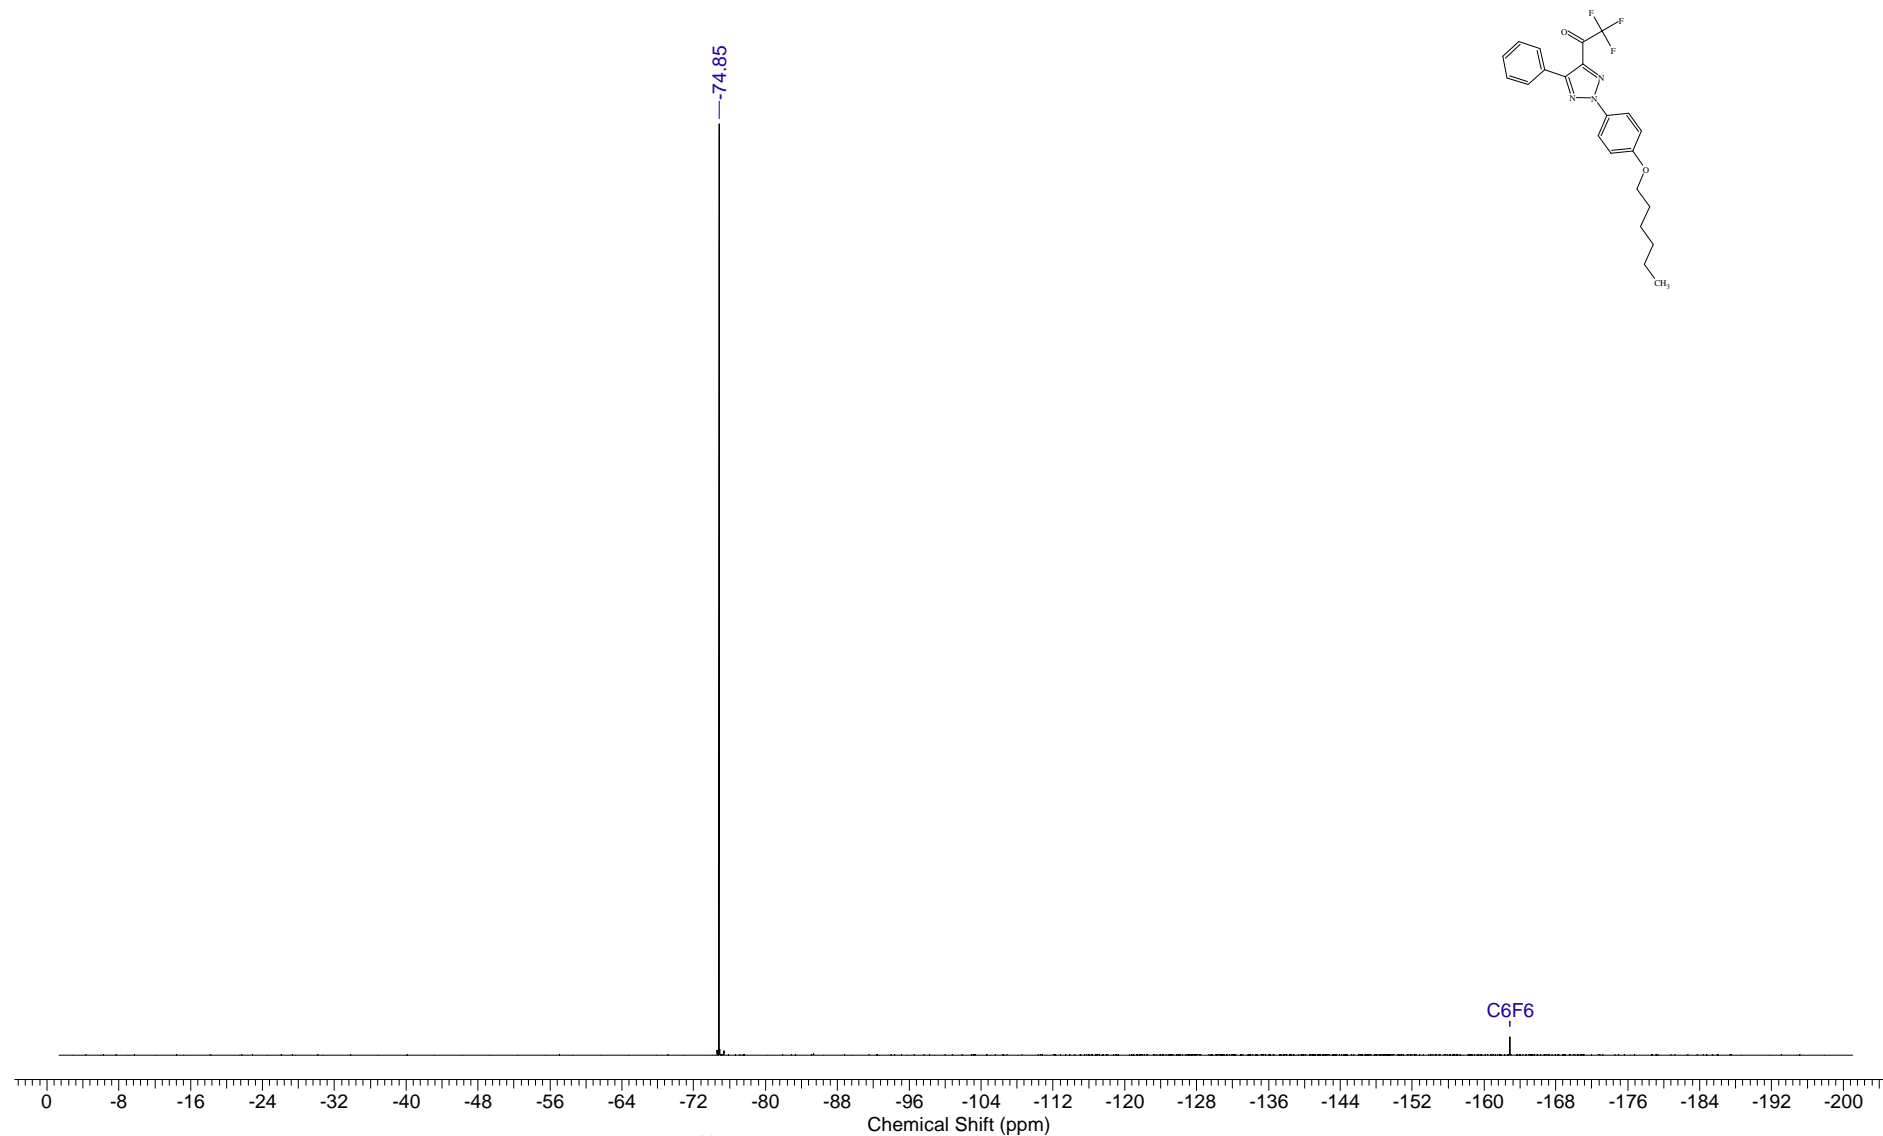

|                               |                                                         |                             |                      |                              |                      |
|-------------------------------|---------------------------------------------------------|-----------------------------|----------------------|------------------------------|----------------------|
| <b>Acquisition Time (sec)</b> | 0.6783                                                  | <b>Comment</b>              | Imported from UXNMR. | <b>Date</b>                  | 21 Oct 2022 16:30:44 |
| <b>File Name</b>              | C:\DOCS\OUTPUT_301\2022\10.октябрь\BM-2656-2p.C_002001r |                             |                      | <b>Frequency (MHz)</b>       | 100.61               |
| <b>Nucleus</b>                | <sup>13</sup> C                                         | <b>Number of Transients</b> | 386                  | <b>Original Points Count</b> | 16384                |
| <b>Pulse Sequence</b>         | zgpg30                                                  | <b>Solvent</b>              | CHLOROFORM-D         | <b>Points Count</b>          | 131072               |
| <b>Temperature (degree C)</b> | 27.000                                                  |                             |                      | <b>Sweep Width (Hz)</b>      | 24154.59             |

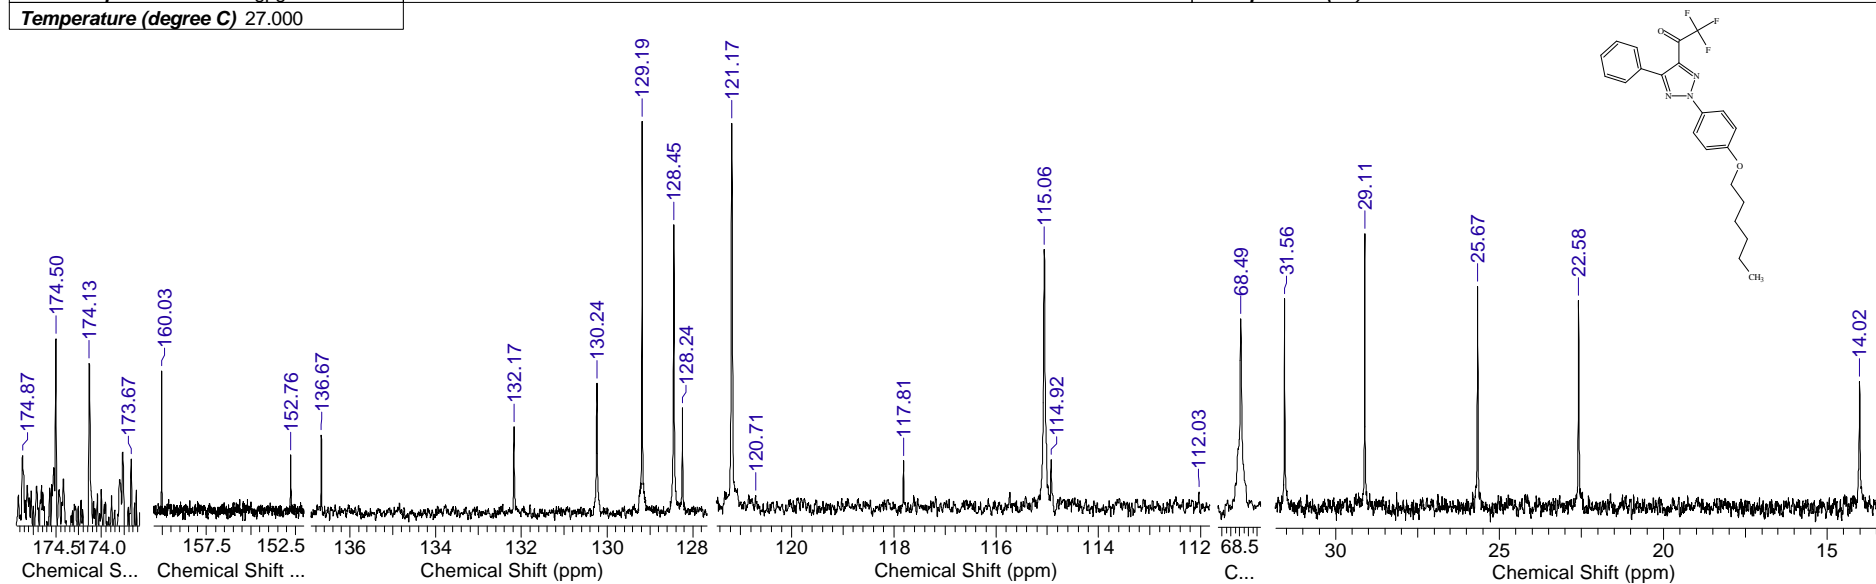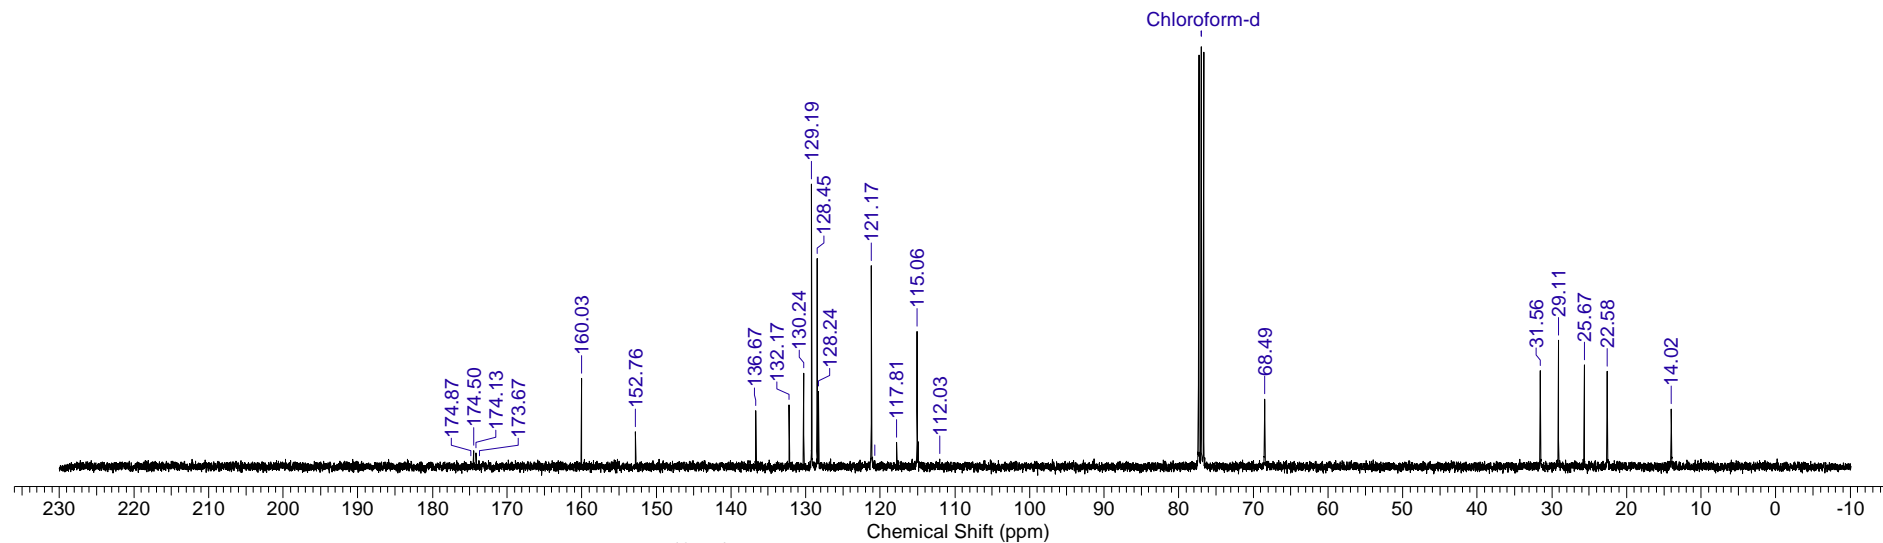<sup>13</sup>C{<sup>1</sup>H} NMR spectrum of **17** (100.6 MHz, CDCl<sub>3</sub>)

|                        |                                                            |                      |                      |                       |                 |                        |        |
|------------------------|------------------------------------------------------------|----------------------|----------------------|-----------------------|-----------------|------------------------|--------|
| Acquisition Time (sec) | 4.0894                                                     | Comment              | Imported from UXNMR. |                       | Date            | 11 Nov 2022 15:50:04   |        |
| File Name              | C:\BM_DATA\DOCS\SZA-BM-11.11.2022\SZA-BM-2674(2).H_001001r |                      |                      |                       | Frequency (MHz) | 400.13                 |        |
| Nucleus                | 1H                                                         | Number of Transients | 4                    | Original Points Count | 32768           | Points Count           | 131072 |
| Pulse Sequence         | zg30                                                       | Solvent              | DMSO-D6              | Sweep Width (Hz)      | 8012.82         | Temperature (degree C) | 27.000 |

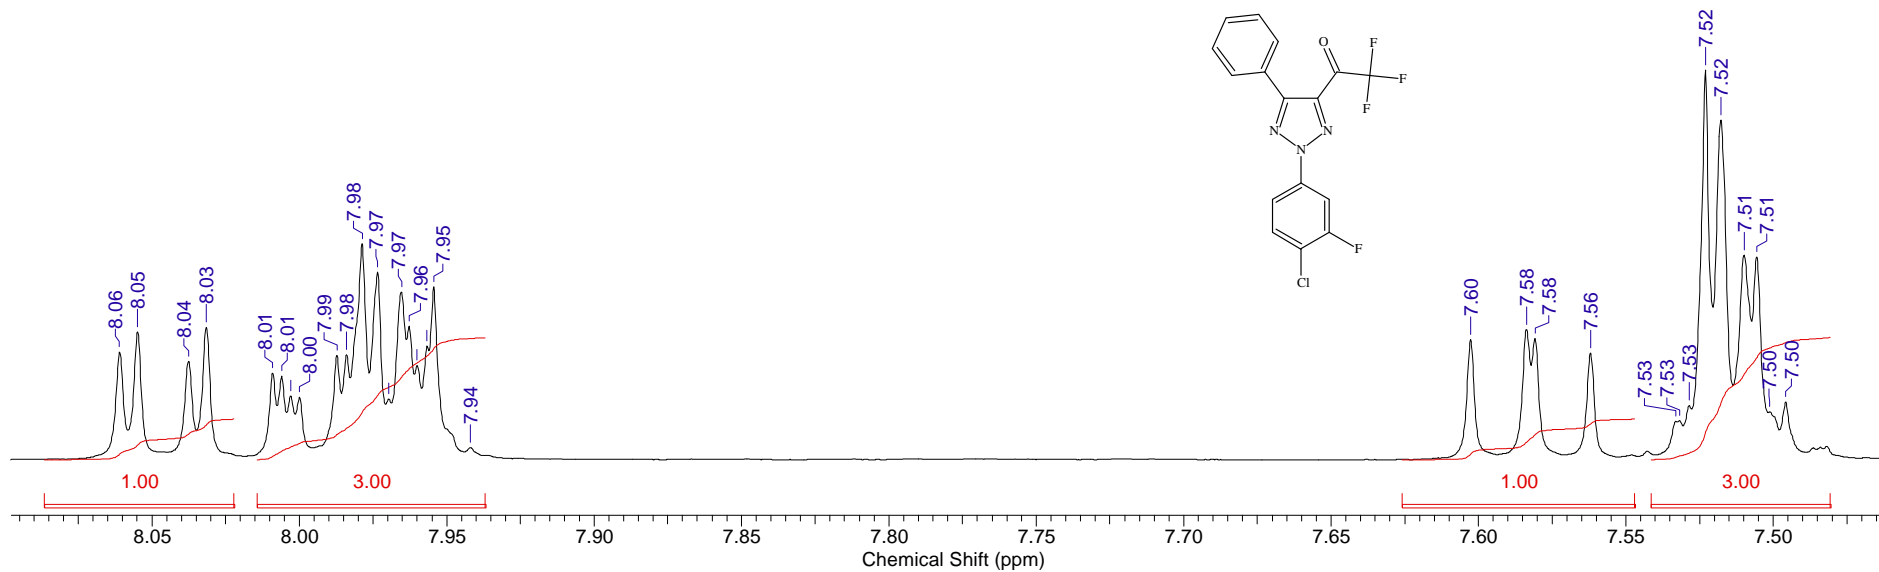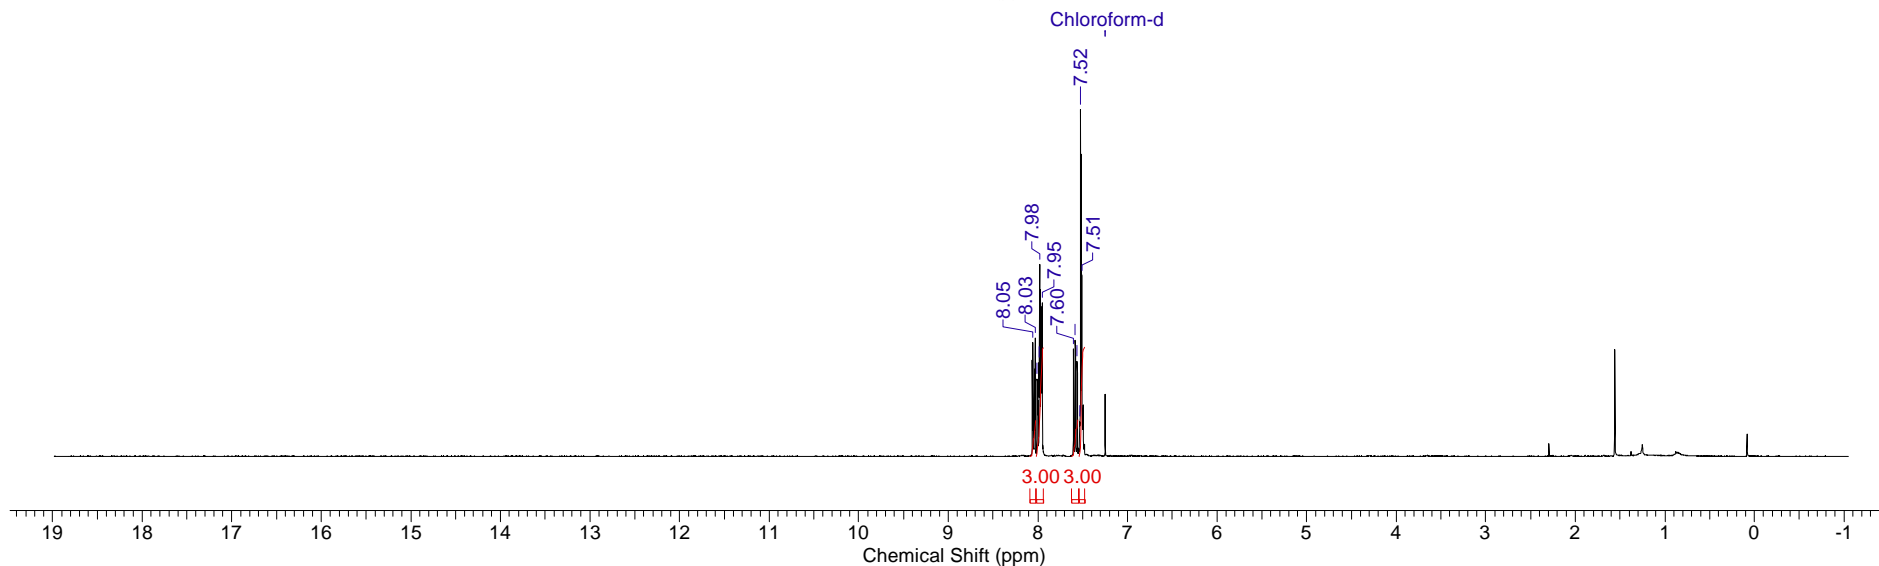<sup>1</sup>H NMR spectrum of **18** (400.1 MHz, CDCl<sub>3</sub>)



|                        |                                                            |                      |                      |                       |                  |                      |        |
|------------------------|------------------------------------------------------------|----------------------|----------------------|-----------------------|------------------|----------------------|--------|
| Acquisition Time (sec) | 1.7433                                                     | Comment              | Imported from UXNMR. |                       | Date             | 11 Nov 2022 15:48:12 |        |
| File Name              | C:\BM_DATA\DOCS\SZA-BM-11.11.2022\SZA-BM-2674(2).F_005001r |                      |                      |                       | Frequency (MHz)  | 376.50               |        |
| Nucleus                | 19F                                                        | Number of Transients | 9                    | Original Points Count | 131072           | Points Count         | 262144 |
| Pulse Sequence         | zgfgqn                                                     | Solvent              | CHLOROFORM-D         |                       | Sweep Width (Hz) | 75187.97             |        |
| Temperature (degree C) | 27.000                                                     |                      |                      |                       |                  |                      |        |

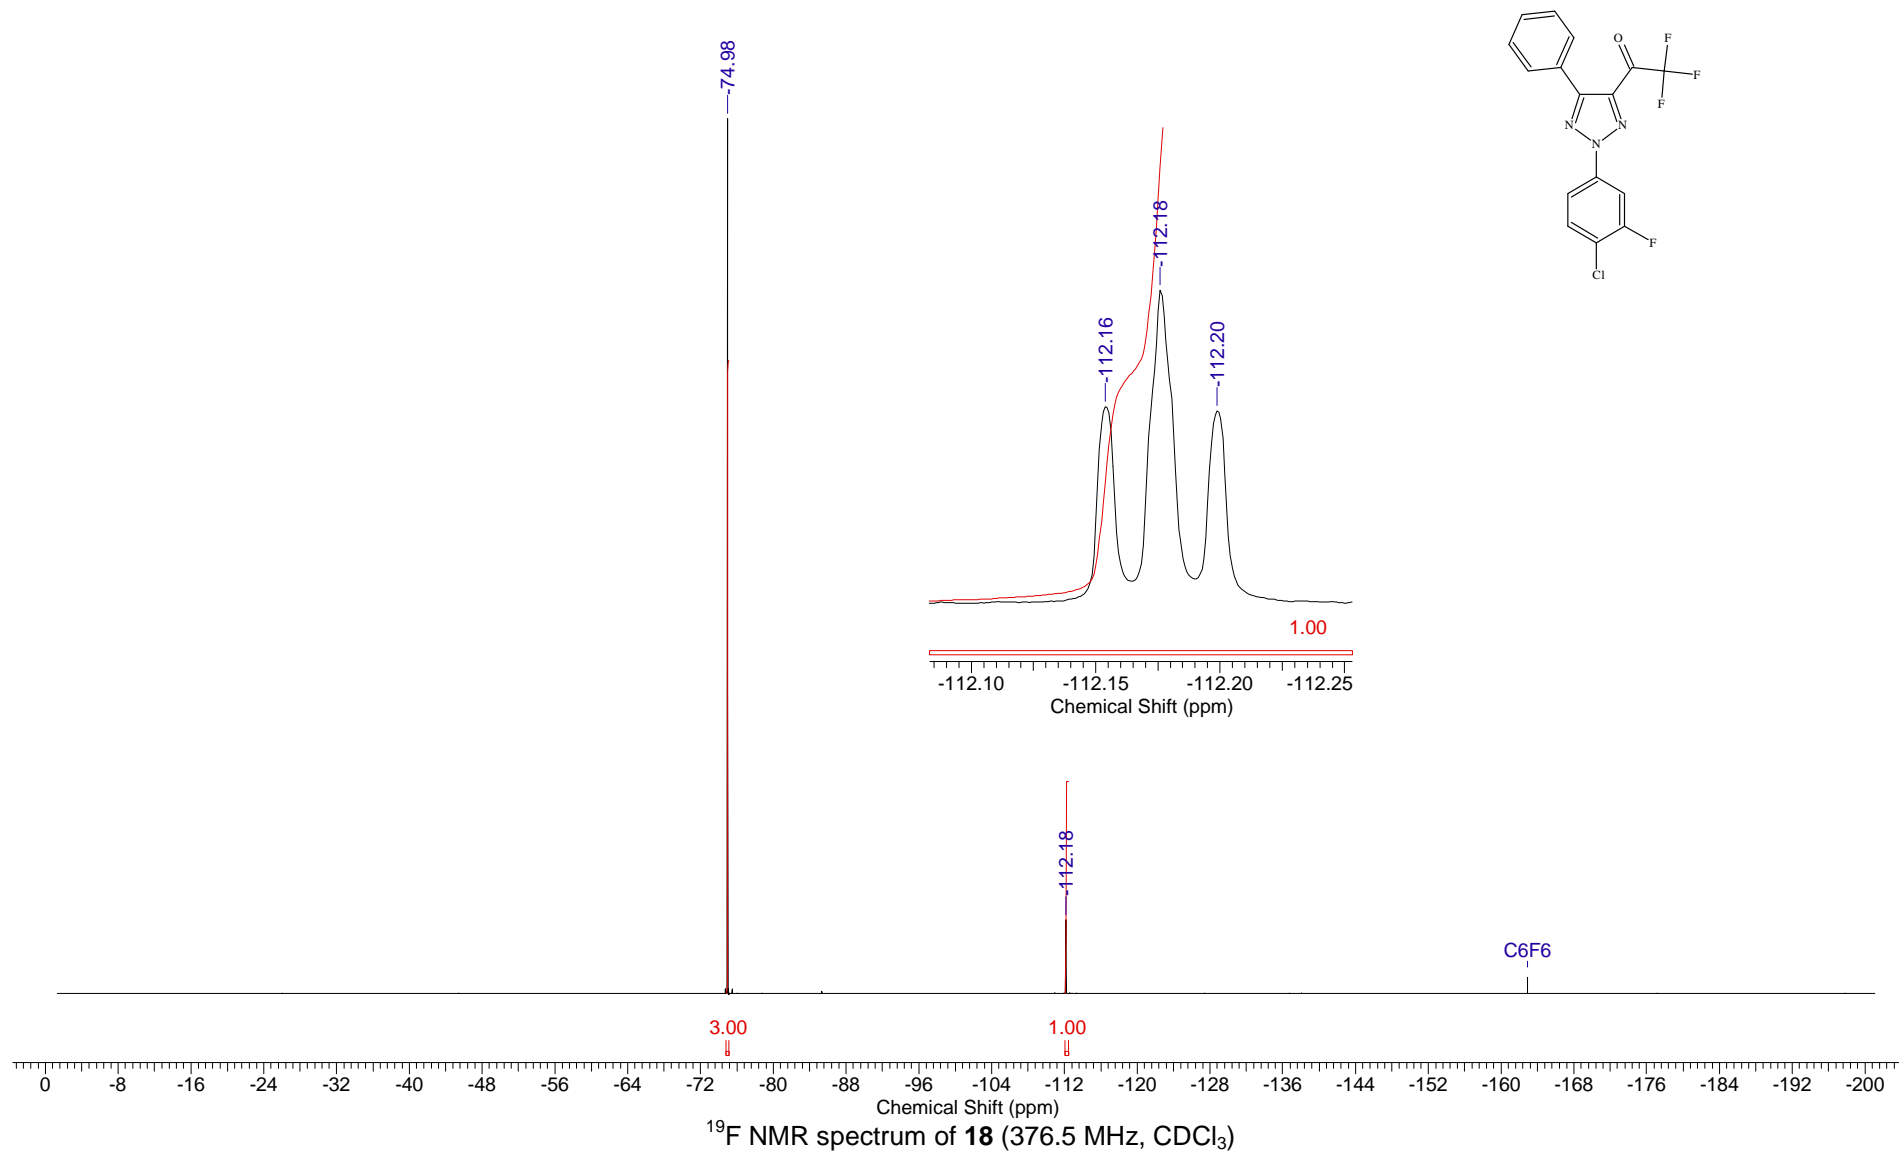

|                        |                                                         |                              |              |                       |                  |                      |        |
|------------------------|---------------------------------------------------------|------------------------------|--------------|-----------------------|------------------|----------------------|--------|
| Acquisition Time (sec) | 0.6783                                                  | Comment Imported from UXNMR. |              |                       | Date             | 11 Nov 2022 15:59:10 |        |
| File Name              | C:\BM_DATA\DOCS\SZA-BM-11.11.2022\SZA-BM-2674.C_002001r |                              |              |                       | Frequency (MHz)  | 100.61               |        |
| Nucleus                | 13C                                                     | Number of Transients         | 193          | Original Points Count | 16384            | Points Count         | 131072 |
| Pulse Sequence         | zgpg30                                                  | Solvent                      | CHLOROFORM-D |                       | Sweep Width (Hz) | 24154.59             |        |
| Temperature (degree C) | 27.000                                                  |                              |              |                       |                  |                      |        |

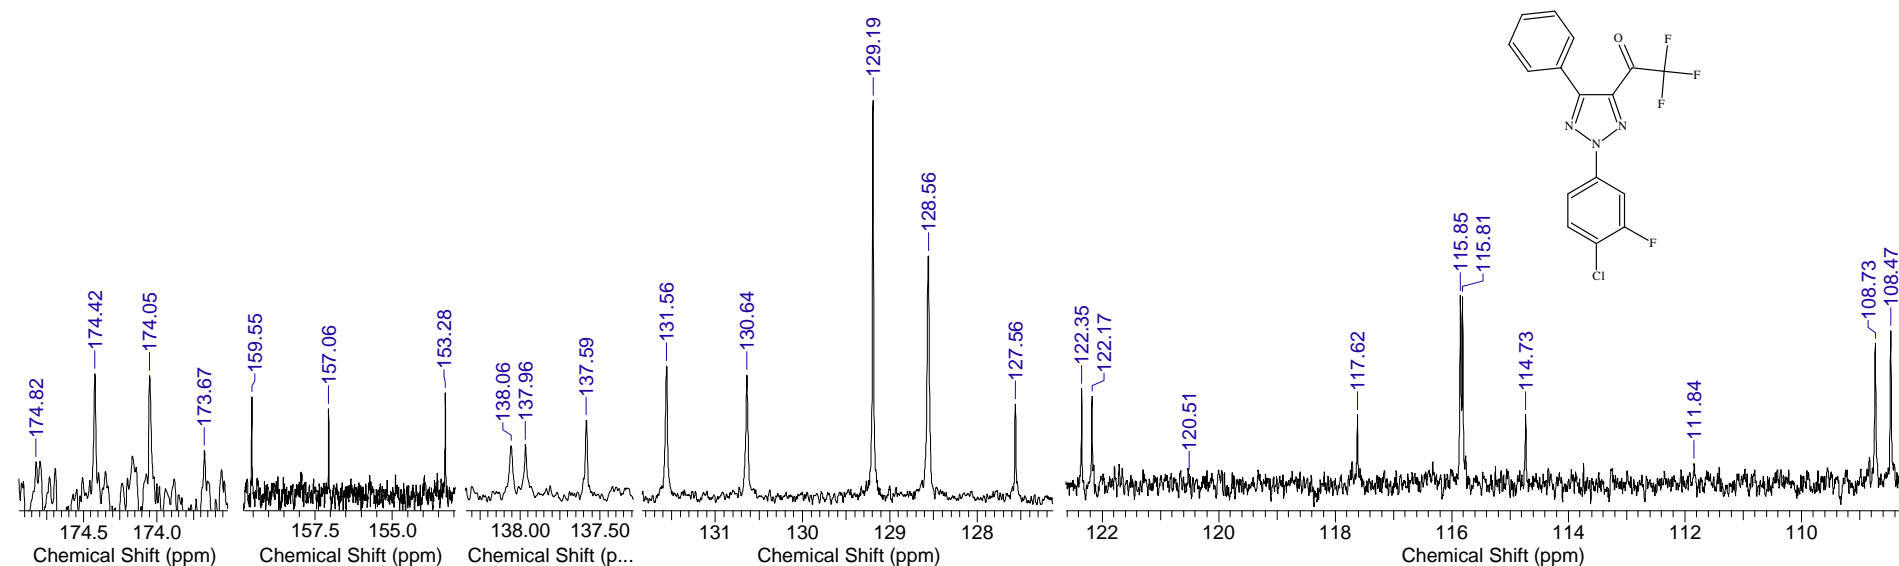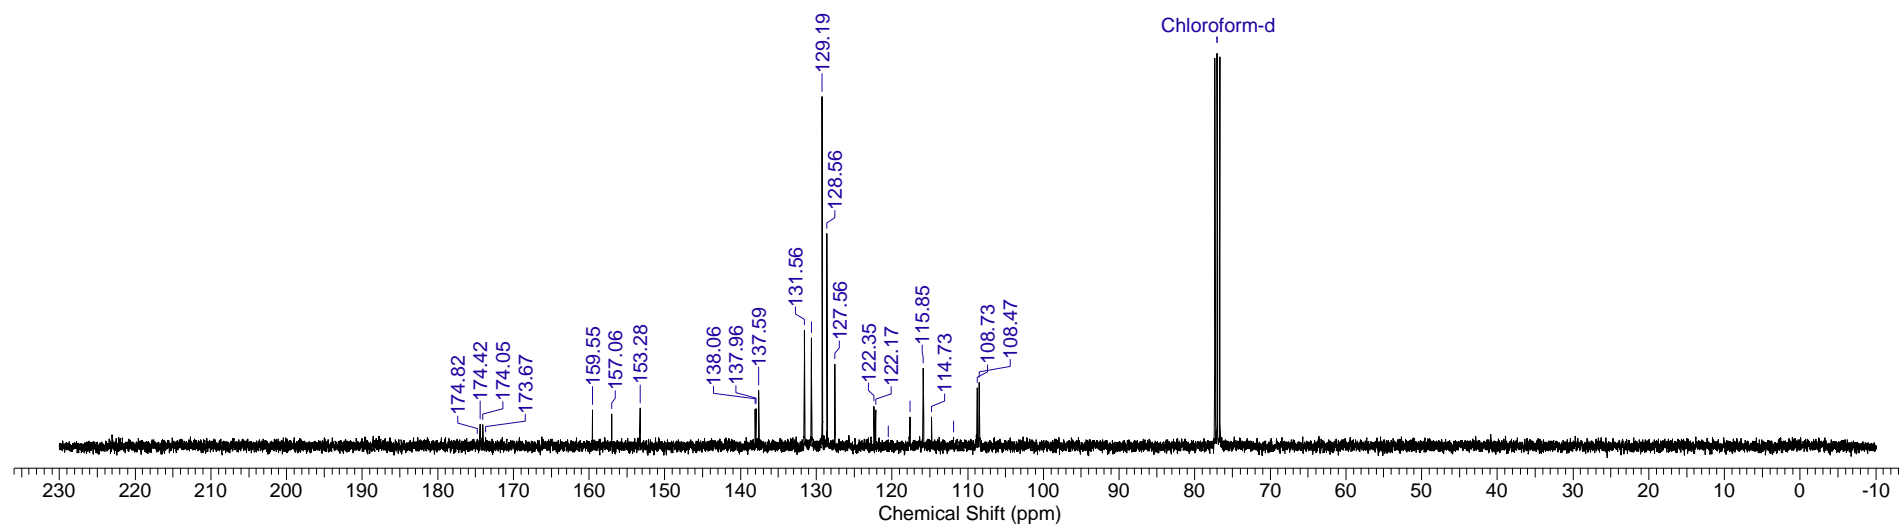<sup>13</sup>C{<sup>1</sup>H} NMR spectrum of **18** (100.6 MHz, CDCl<sub>3</sub>)

S138

|                               |                                                           |                             |                      |                              |                      |
|-------------------------------|-----------------------------------------------------------|-----------------------------|----------------------|------------------------------|----------------------|
| <b>Acquisition Time (sec)</b> | 4.0894                                                    | <b>Comment</b>              | Imported from UXNMR. | <b>Date</b>                  | 11 Nov 2022 15:36:22 |
| <b>File Name</b>              | C:\BM_DATA\DOCS\SZA-BM-11.11.2022\SZA-BM-2675-8.H_001001r |                             |                      | <b>Frequency (MHz)</b>       | 400.13               |
| <b>Nucleus</b>                | <sup>1</sup> H                                            | <b>Number of Transients</b> | 4                    | <b>Original Points Count</b> | 32768                |
| <b>Pulse Sequence</b>         | zg30                                                      | <b>Solvent</b>              | DEUTERIUM OXIDE      | <b>Points Count</b>          | 131072               |
| <b>Temperature (degree C)</b> | 27.000                                                    |                             |                      | <b>Sweep Width (Hz)</b>      | 8012.82              |

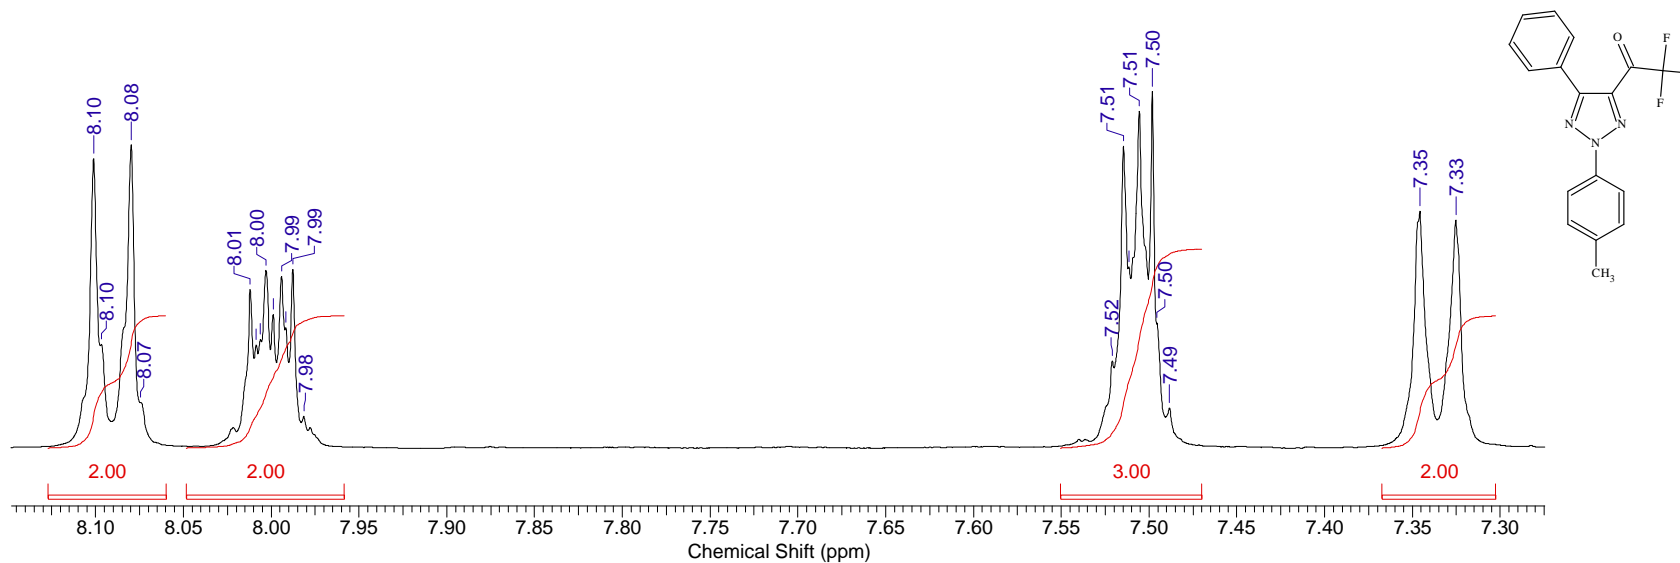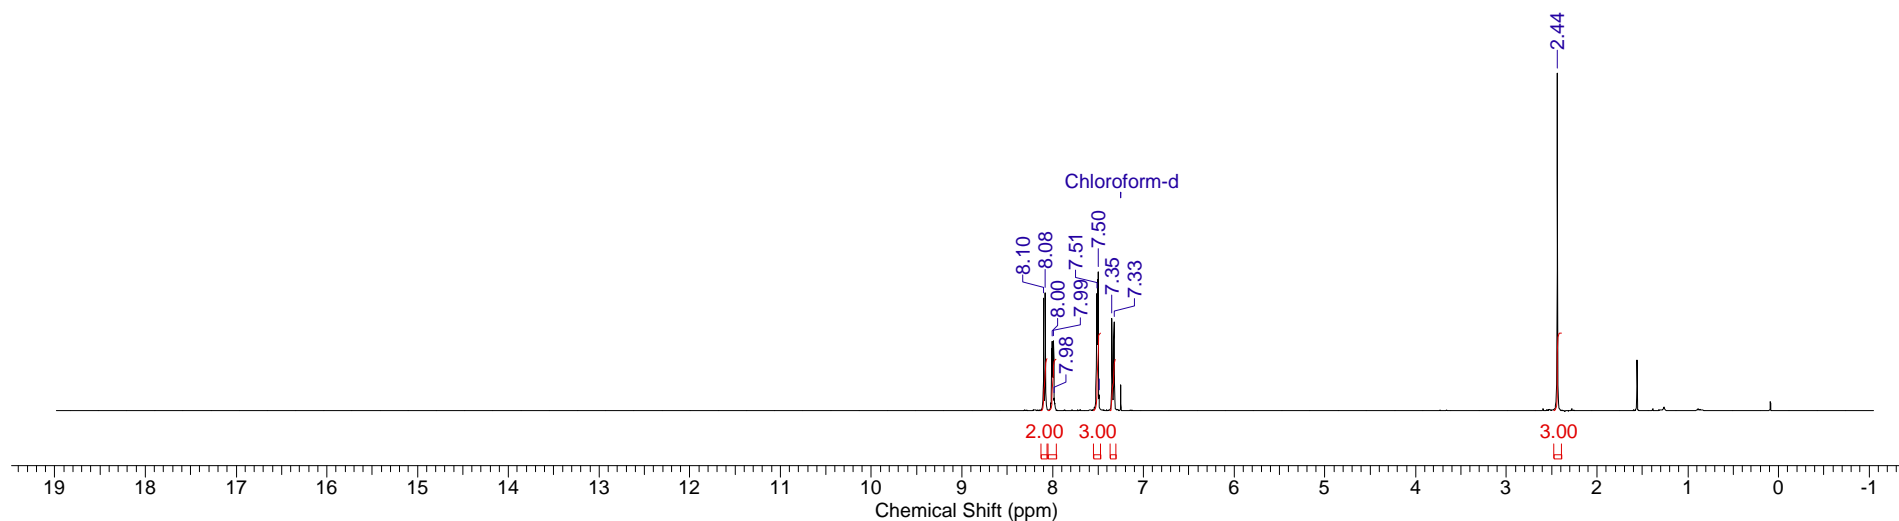<sup>1</sup>H NMR spectrum of **19** (400.1 MHz, CDCl<sub>3</sub>)

|                        |                                                         |                      |                      |                       |        |                  |                      |
|------------------------|---------------------------------------------------------|----------------------|----------------------|-----------------------|--------|------------------|----------------------|
| Acquisition Time (sec) | 1.7433                                                  | Comment              | Imported from UXNMR. |                       |        | Date             | 11 Nov 2022 15:39:46 |
| File Name              | C:\BM_DATA\DOCS\SA-BM-11.11.2022\SA-BM-2675-8.F_005001r |                      |                      |                       |        | Frequency (MHz)  | 376.50               |
| Nucleus                | 19F                                                     | Number of Transients | 13                   | Original Points Count | 131072 | Points Count     | 262144               |
| Pulse Sequence         | zgfgqn                                                  | Solvent              | CHLOROFORM-D         |                       |        | Sweep Width (Hz) | 75187.97             |
| Temperature (degree C) | 27.000                                                  |                      |                      |                       |        |                  |                      |

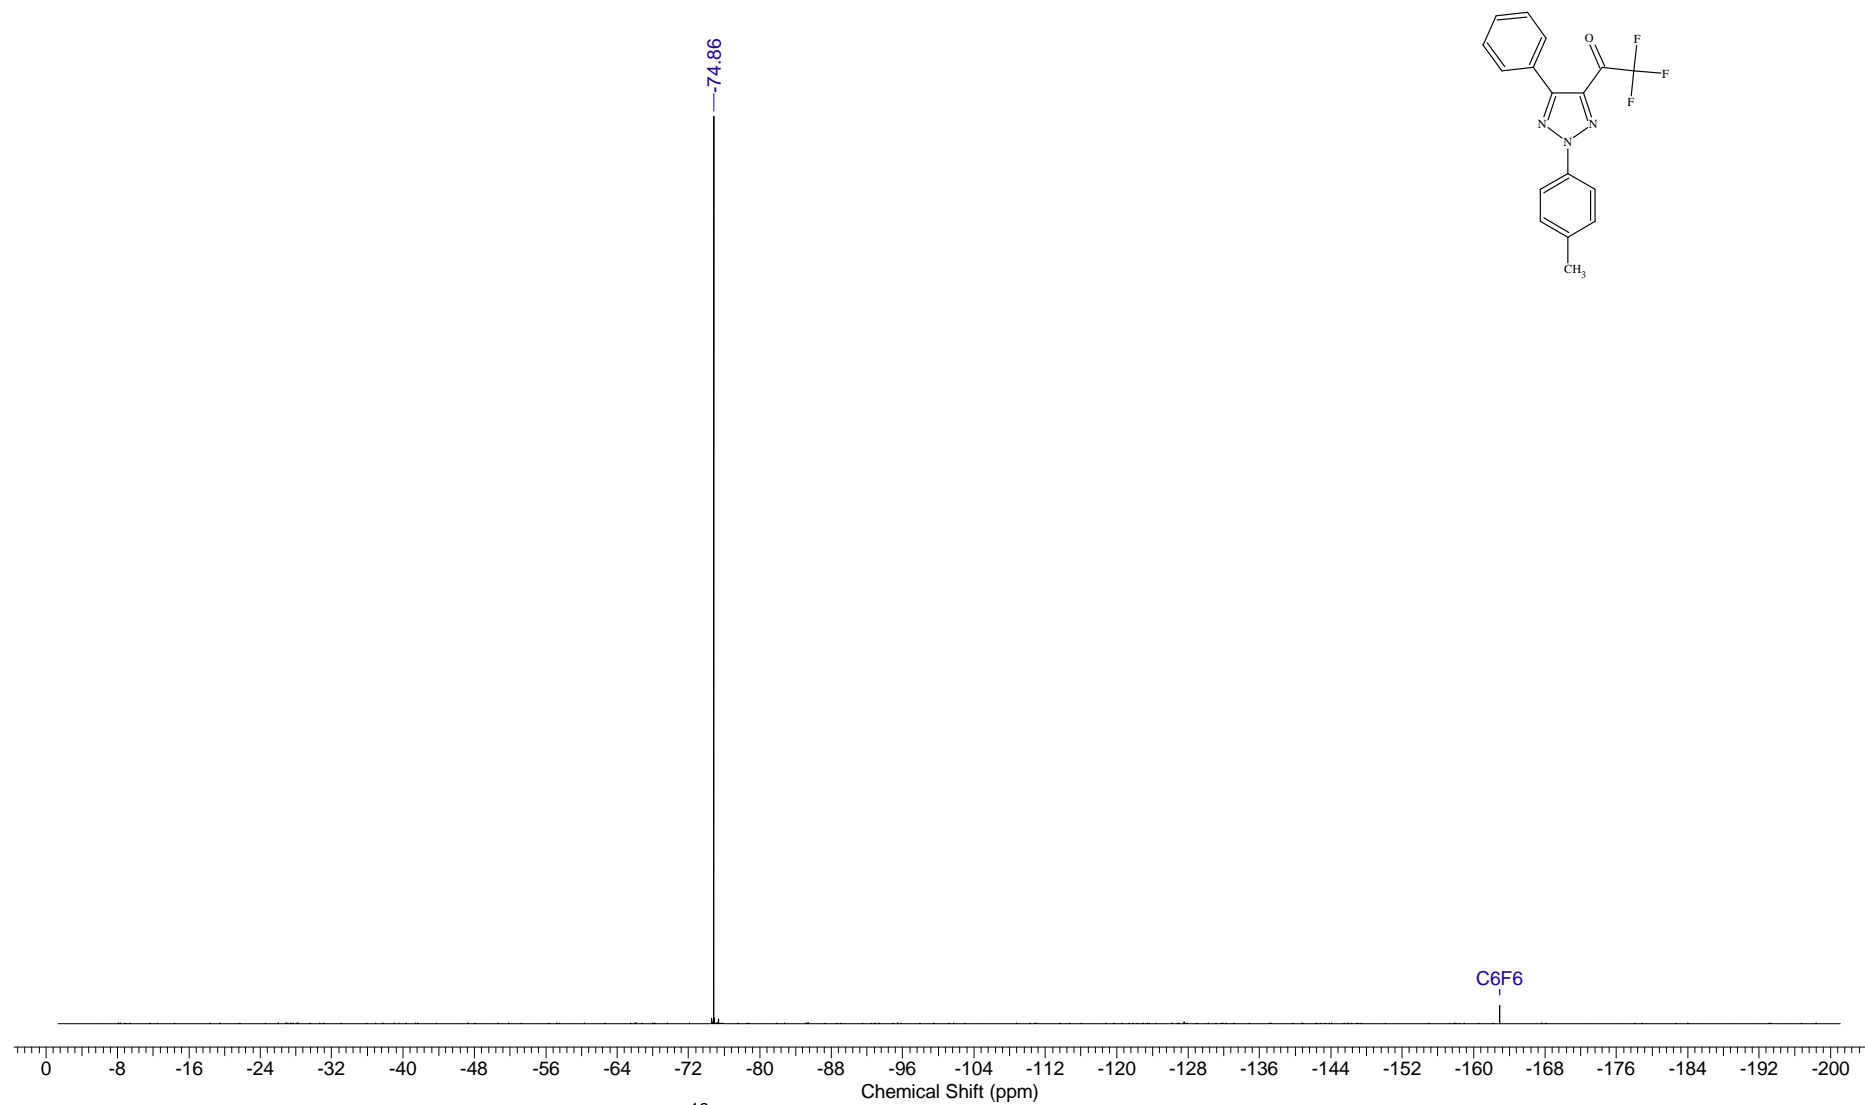

|                        |                                                         |                      |                      |                       |                  |                      |        |
|------------------------|---------------------------------------------------------|----------------------|----------------------|-----------------------|------------------|----------------------|--------|
| Acquisition Time (sec) | 0.6783                                                  | Comment              | Imported from UXNMR. |                       | Date             | 11 Nov 2022 16:04:30 |        |
| File Name              | C:\BM_DATA\DOCS\SA-BM-11.11.2022\SA-BM-2675-8.C_002001r |                      |                      |                       | Frequency (MHz)  | 100.61               |        |
| Nucleus                | 13C                                                     | Number of Transients | 71                   | Original Points Count | 16384            | Points Count         | 131072 |
| Pulse Sequence         | zgpg30                                                  | Solvent              | CHLOROFORM-D         |                       | Sweep Width (Hz) | 24154.59             |        |
| Temperature (degree C) | 27.000                                                  |                      |                      |                       |                  |                      |        |

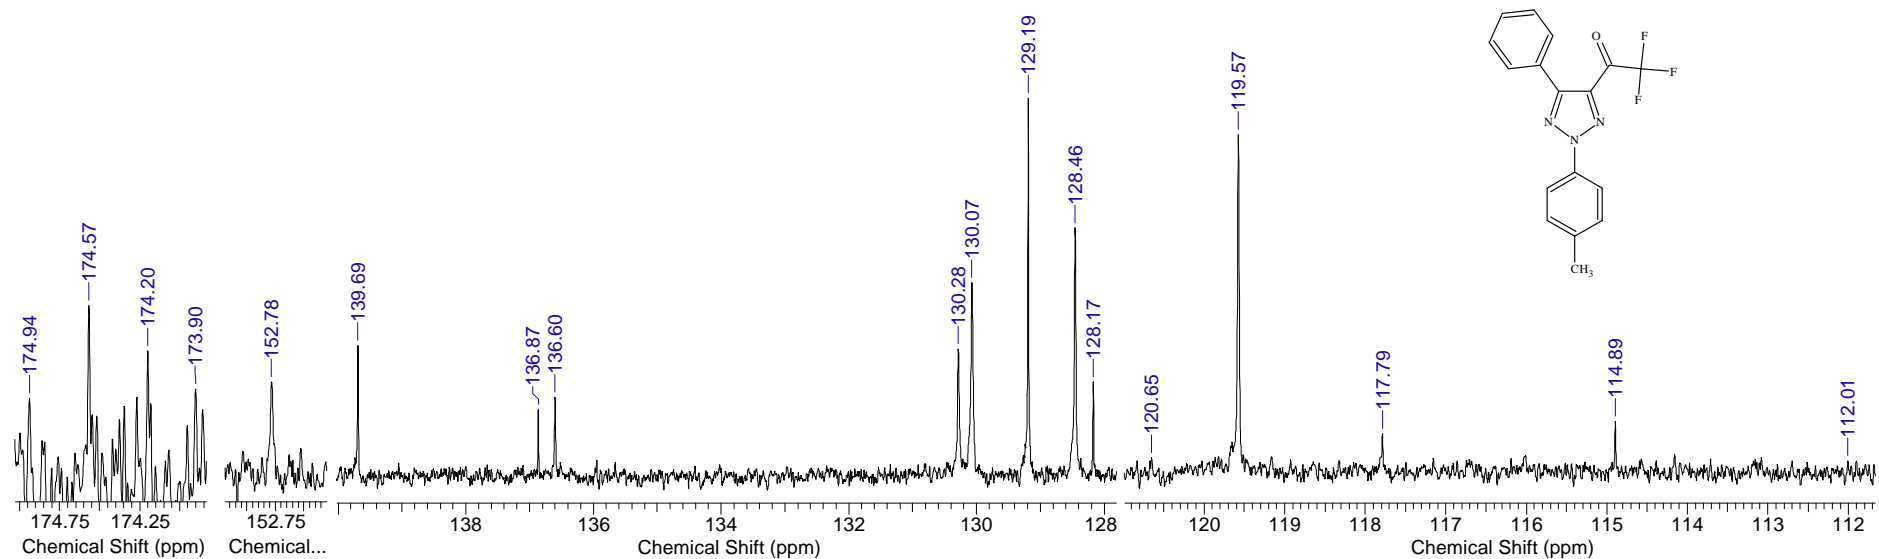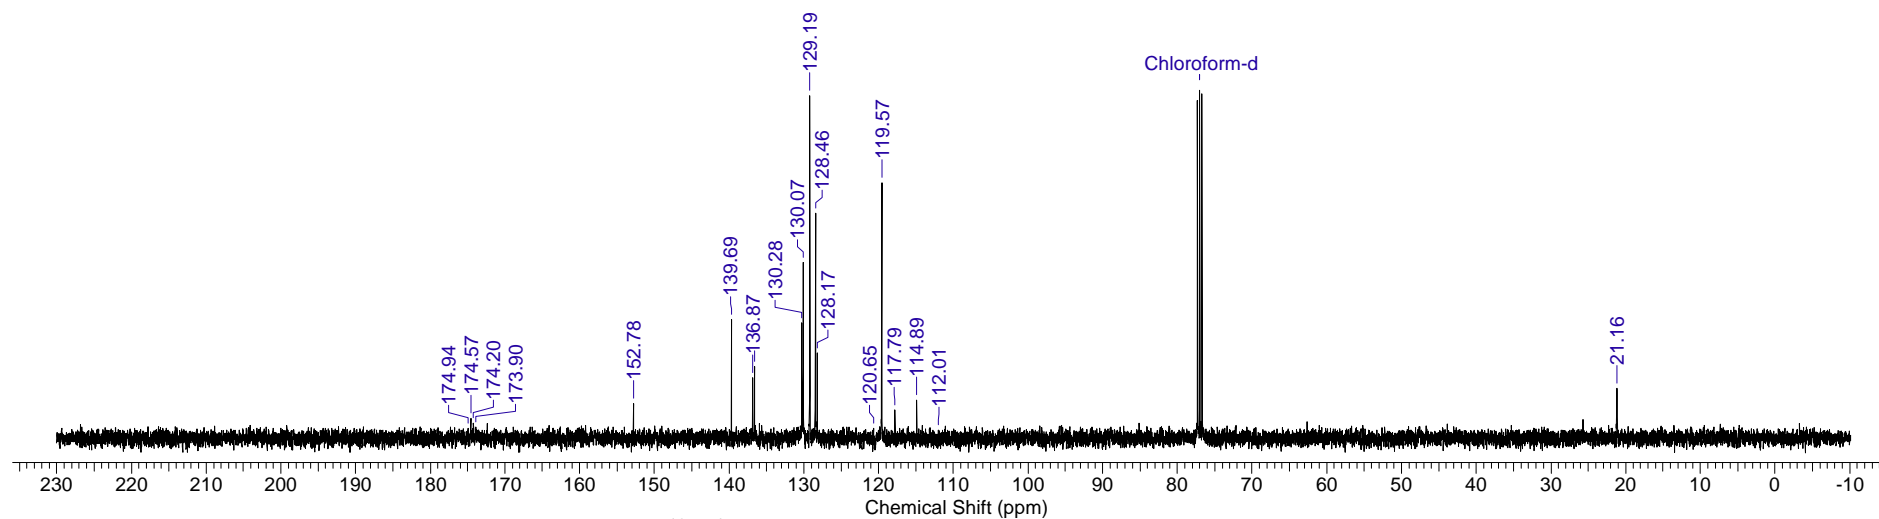<sup>13</sup>C{<sup>1</sup>H} NMR spectrum of **19** (100.6 MHz, CDCl<sub>3</sub>)

|                        |                                                     |                      |                      |                       |         |                        |                      |
|------------------------|-----------------------------------------------------|----------------------|----------------------|-----------------------|---------|------------------------|----------------------|
| Acquisition Time (sec) | 4.0894                                              | Comment              | Imported from UXNMR. |                       |         | Date                   | 10 Nov 2022 14:03:54 |
| File Name              | C:\BM_DATA\DOCS\10.11.22\10.11.22\BM-2673.H_001001r |                      |                      |                       |         | Frequency (MHz)        | 400.13               |
| Nucleus                | 1H                                                  | Number of Transients | 4                    | Original Points Count | 32768   | Points Count           | 131072               |
| Pulse Sequence         | zg30                                                | Solvent              | DMSO-D6              | Sweep Width (Hz)      | 8012.82 | Temperature (degree C) | 27.000               |

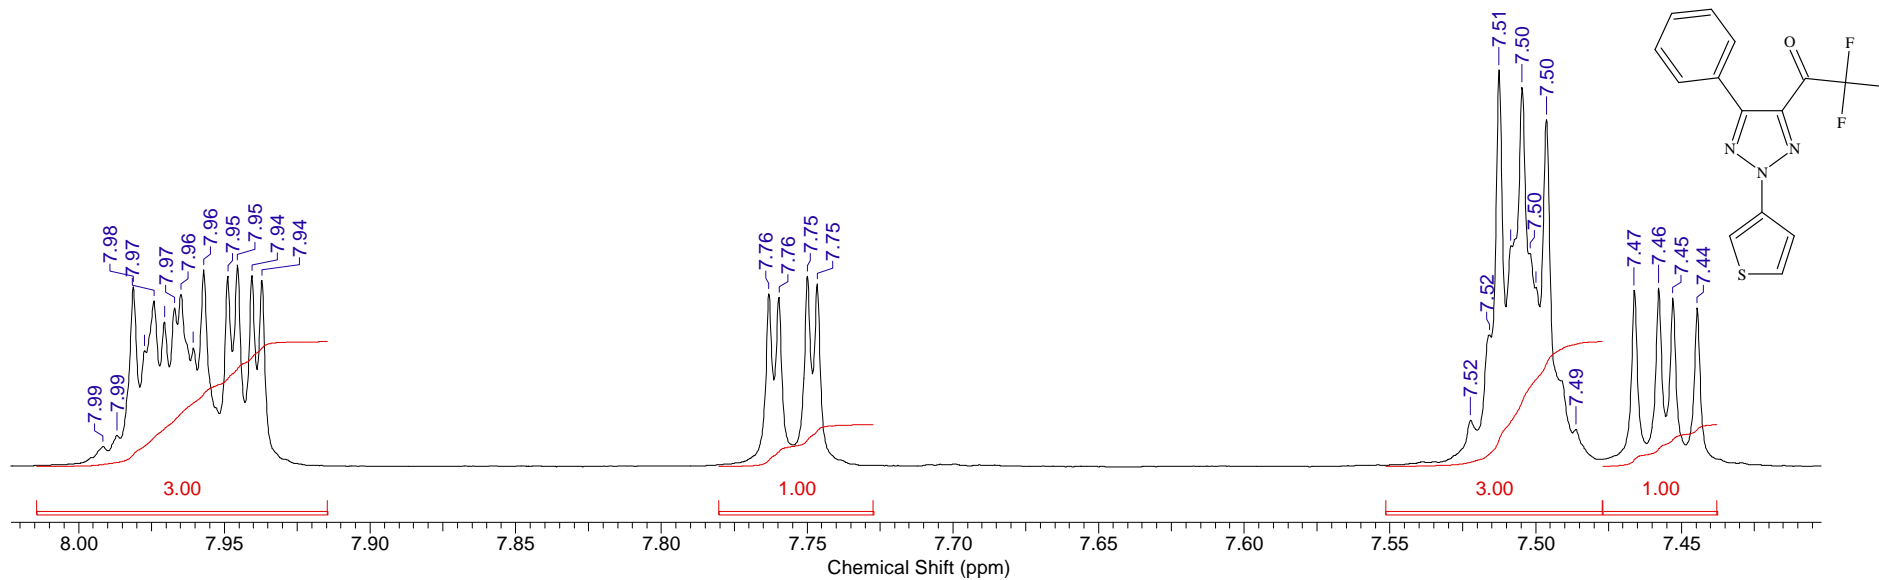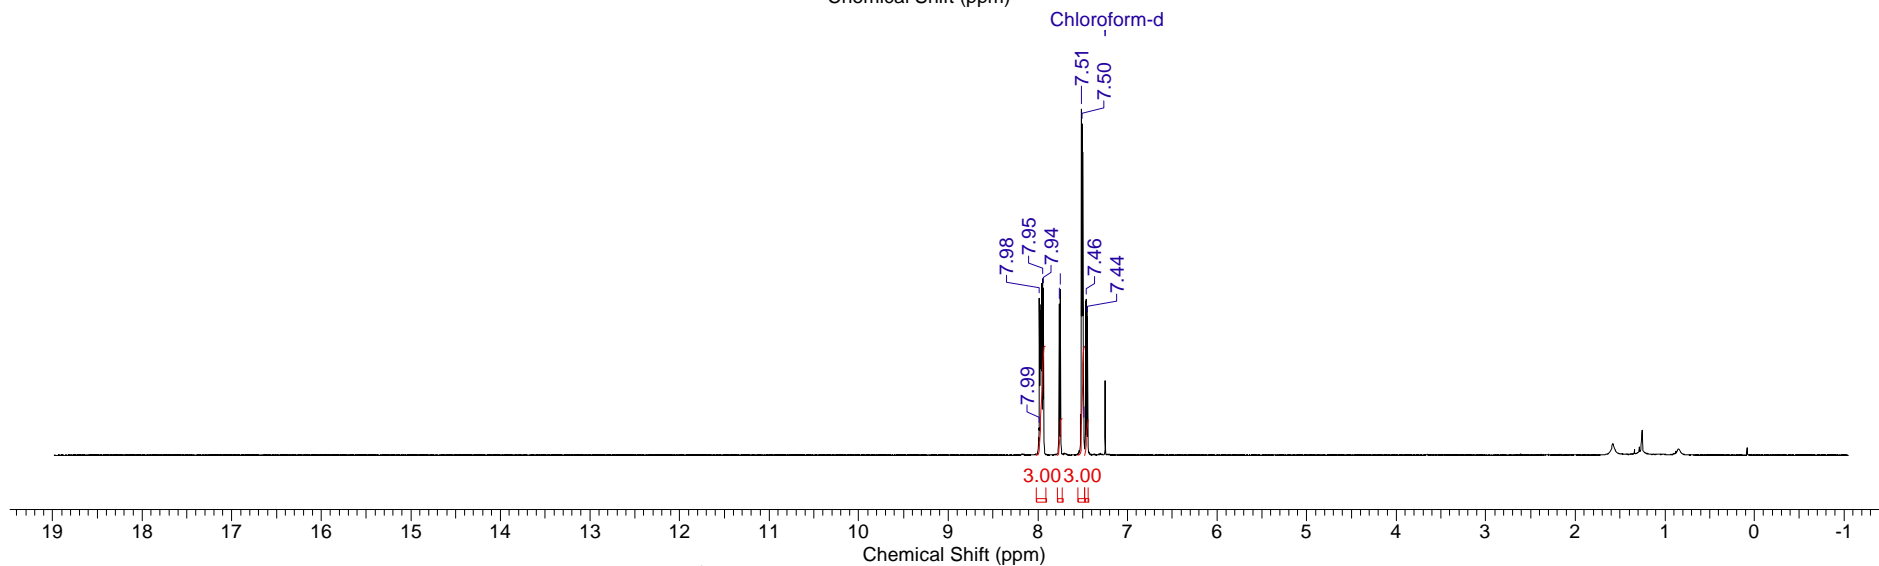

<sup>1</sup>H NMR spectrum of **20** (400.1 MHz, CDCl<sub>3</sub>)

|                               |                                                     |                              |                      |                               |             |                             |
|-------------------------------|-----------------------------------------------------|------------------------------|----------------------|-------------------------------|-------------|-----------------------------|
| <b>Acquisition Time (sec)</b> | 1.7433                                              | <b>Comment</b>               | Imported from UXMNR. |                               | <b>Date</b> | 10 Nov 2022 14:01:52        |
| <b>File Name</b>              | C:\BM_DATA\DOCS\10.11.22\10.11.22\BM-2673.F_005001r | <b>Frequency (MHz)</b>       | 376.50               | <b>Nucleus</b>                | 19F         |                             |
| <b>Number of Transients</b>   | 16                                                  | <b>Original Points Count</b> | 131072               | <b>Points Count</b>           | 262144      | <b>Pulse Sequence</b> zgfgn |
| <b>Solvent</b>                | CHLOROFORM-D                                        | <b>Sweep Width (Hz)</b>      | 75187.97             | <b>Temperature (degree C)</b> | 27.000      |                             |

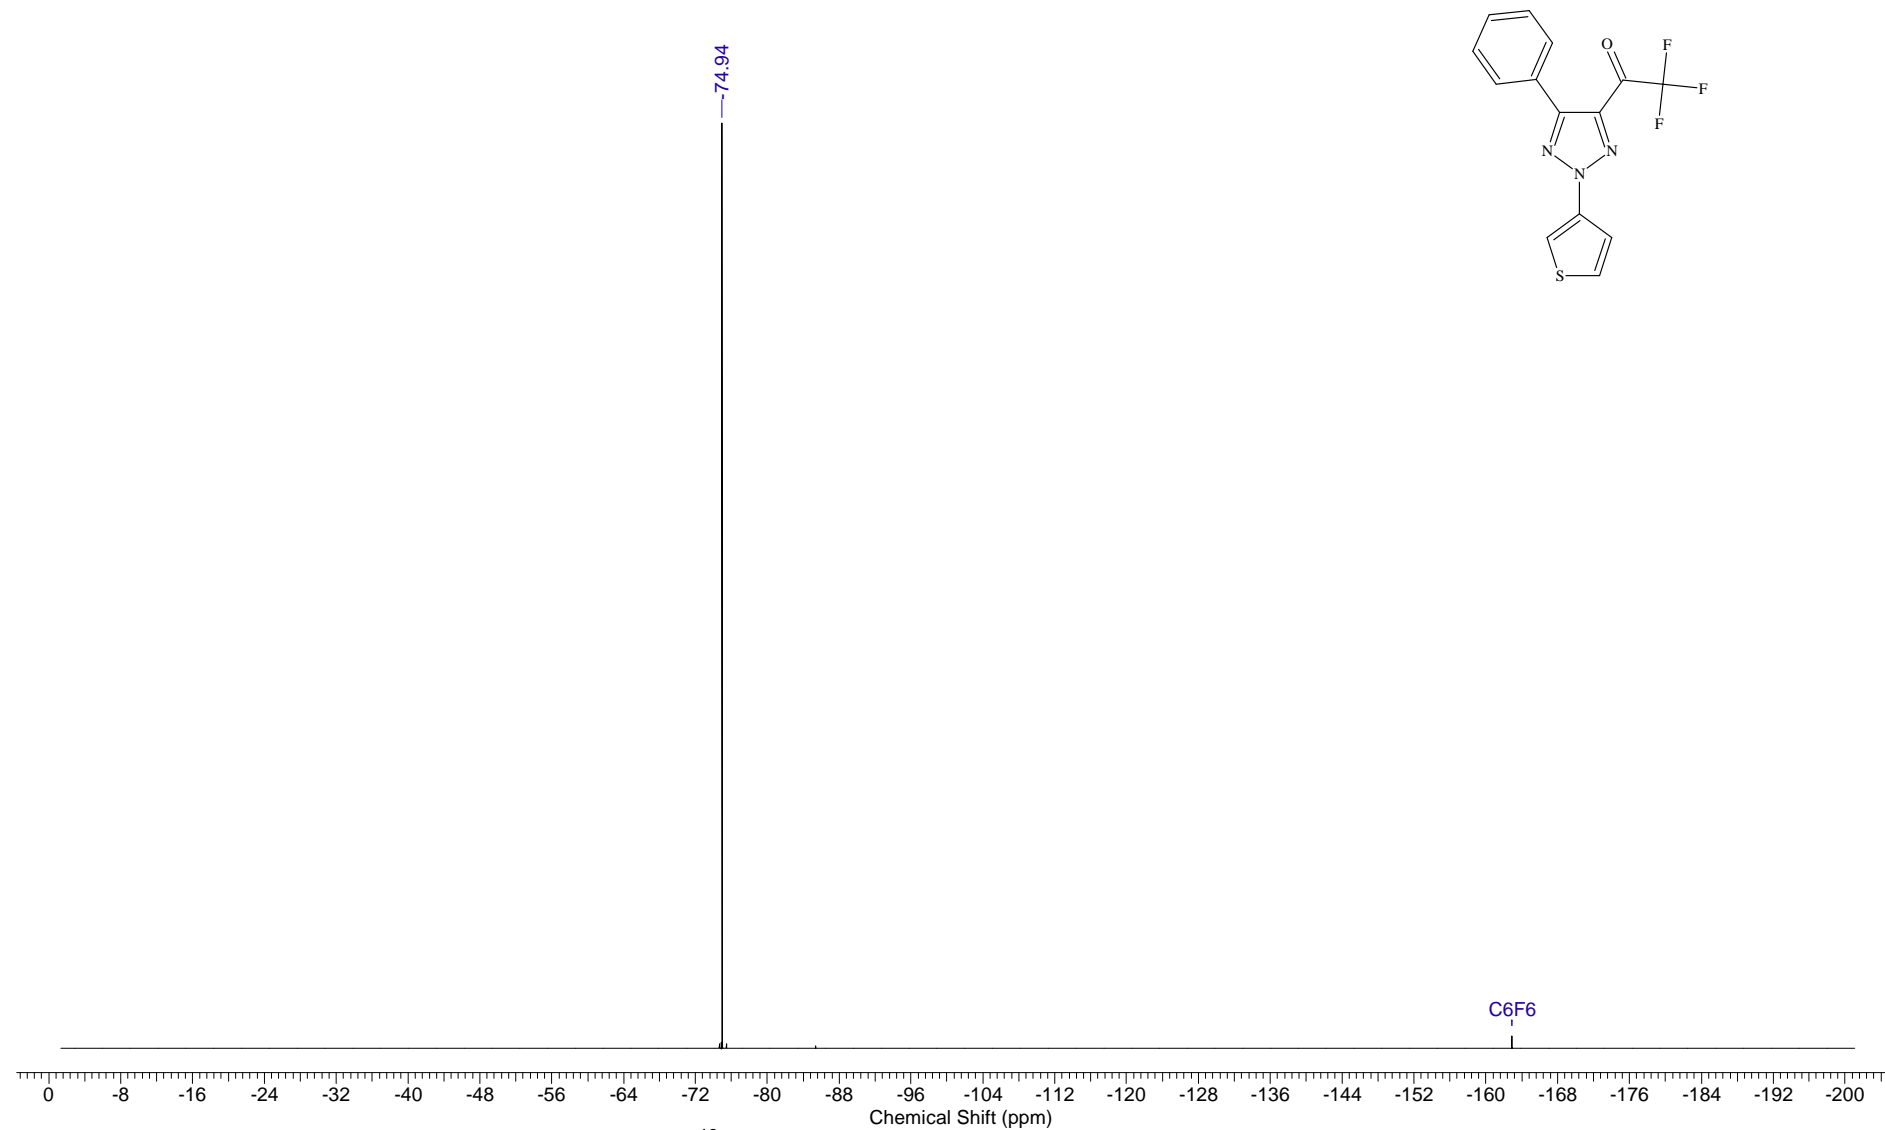

|                               |                                                     |                              |                      |                               |                      |
|-------------------------------|-----------------------------------------------------|------------------------------|----------------------|-------------------------------|----------------------|
| <b>Acquisition Time (sec)</b> | 0.6783                                              | <b>Comment</b>               | Imported from UXMNR. | <b>Date</b>                   | 10 Nov 2022 14:21:18 |
| <b>File Name</b>              | C:\BM_DATA\DOCS\10.11.22\10.11.22\BM-2673.C_002001r | <b>Frequency (MHz)</b>       | 100.61               | <b>Nucleus</b>                | <sup>13</sup> C      |
| <b>Number of Transients</b>   | 386                                                 | <b>Original Points Count</b> | 16384                | <b>Points Count</b>           | 131072               |
| <b>Solvent</b>                | CHLOROFORM-D                                        | <b>Sweep Width (Hz)</b>      | 24154.59             | <b>Pulse Sequence</b>         | zgpg30               |
|                               |                                                     |                              |                      | <b>Temperature (degree C)</b> | 27.000               |

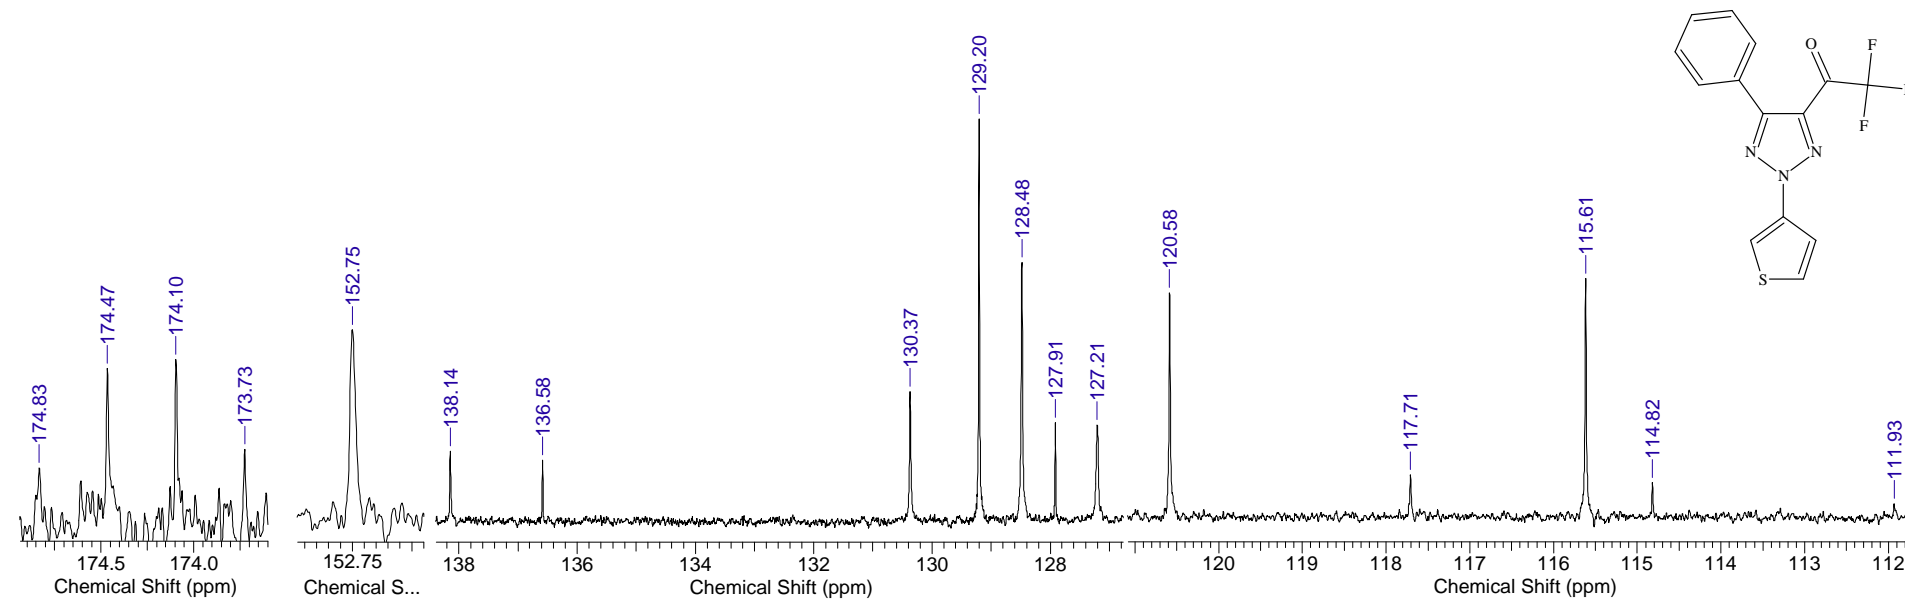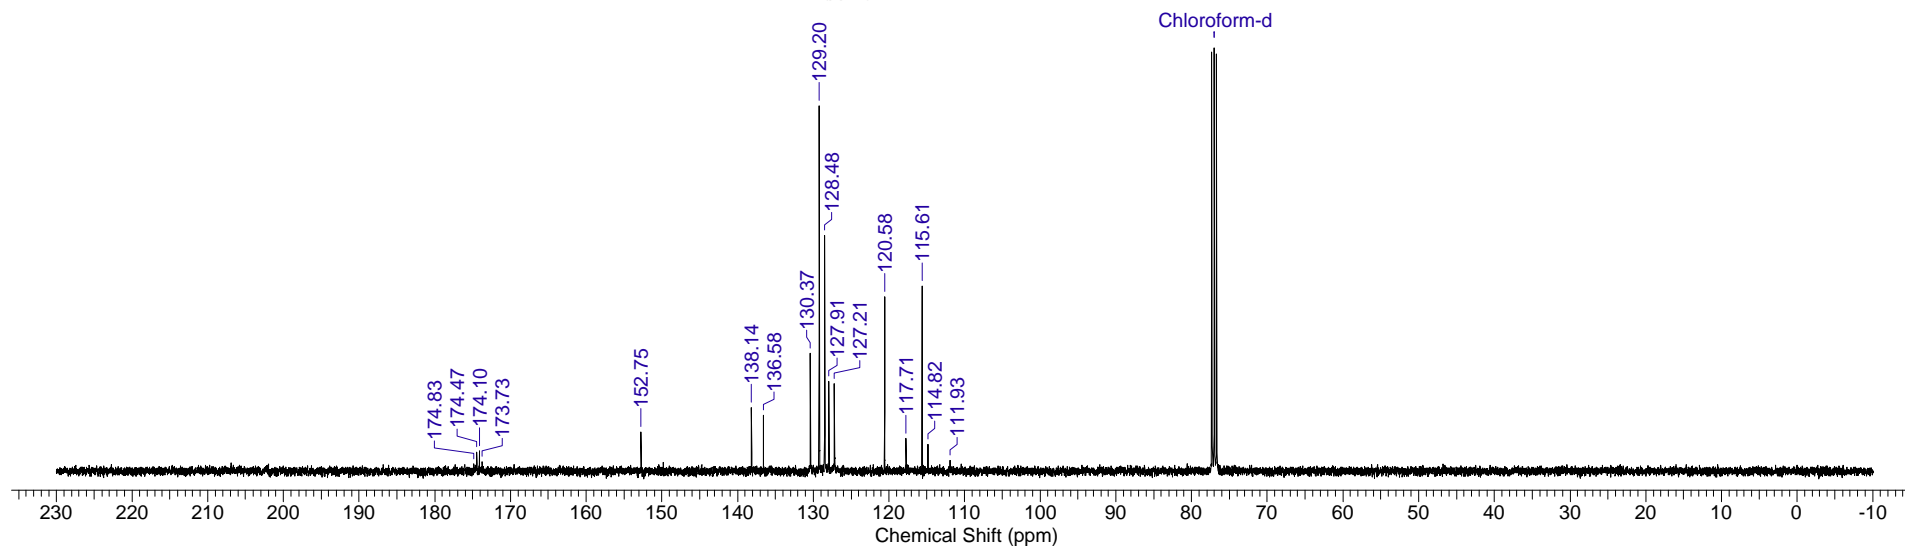<sup>13</sup>C{<sup>1</sup>H} NMR spectrum of **20** (100.6 MHz, CDCl<sub>3</sub>)



|                        |                                                      |                      |                      |                       |       |                  |                      |
|------------------------|------------------------------------------------------|----------------------|----------------------|-----------------------|-------|------------------|----------------------|
| Acquisition Time (sec) | 4.0894                                               | Comment              | Imported from UXNMR. |                       |       | Date             | 17 Dec 2022 13:36:08 |
| File Name              | C:\DOCS\OUTPUT_301\2022\12_декабрь\BM-2702.H_001001r |                      |                      |                       |       | Frequency (MHz)  | 400.13               |
| Nucleus                | 1H                                                   | Number of Transients | 4                    | Original Points Count | 32768 | Points Count     | 131072               |
| Pulse Sequence         | zg30                                                 | Solvent              | CHLOROFORM-D         |                       |       | Sweep Width (Hz) | 8012.82              |
| Temperature (degree C) | 27.000                                               |                      |                      |                       |       |                  |                      |

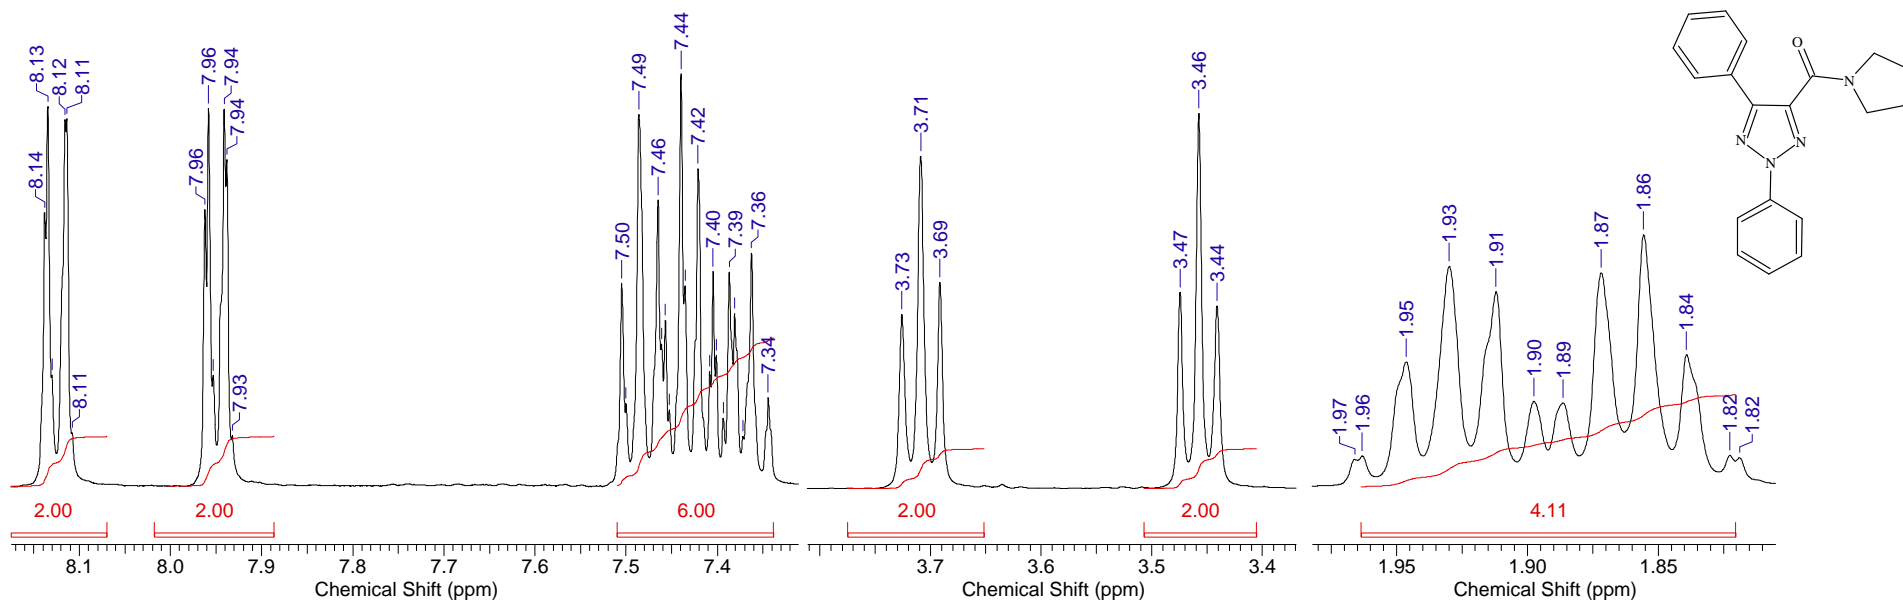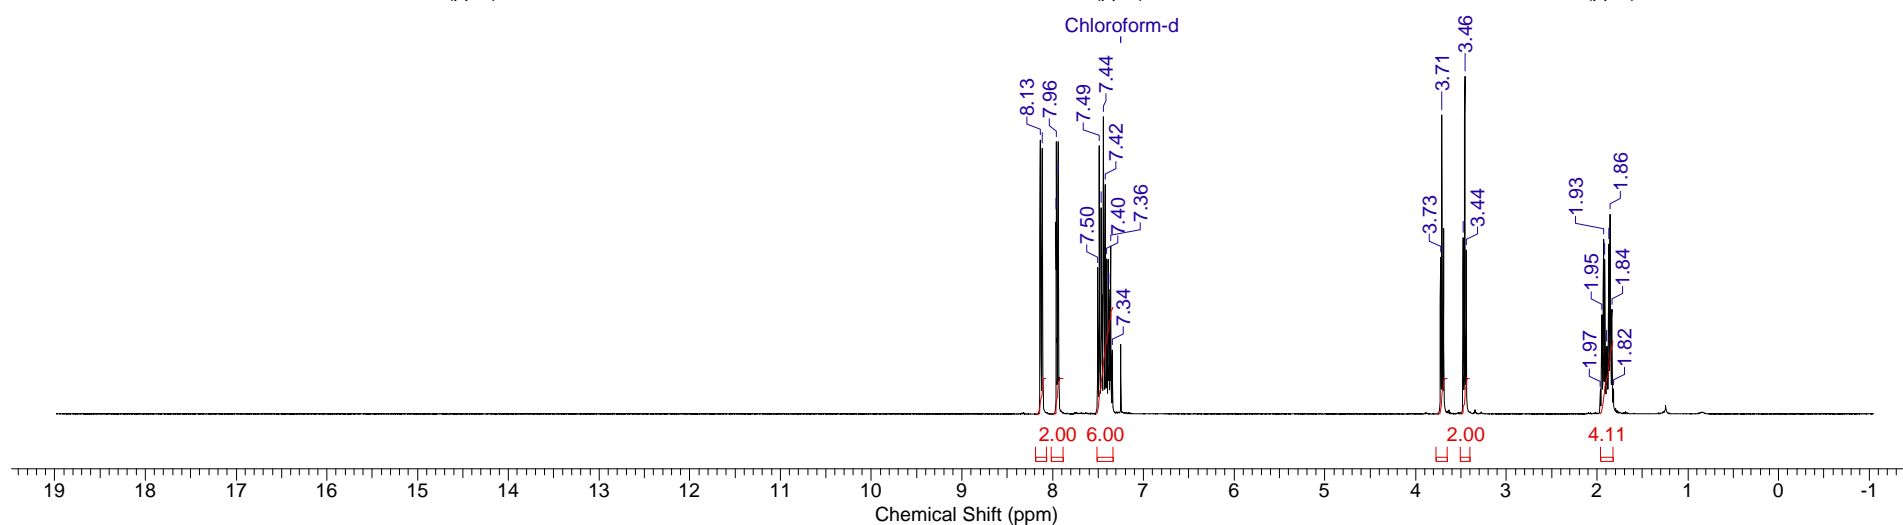<sup>1</sup>H NMR spectrum of **21** (400.1 MHz, CDCl<sub>3</sub>)

|                               |                                                      |                             |                      |                              |                      |
|-------------------------------|------------------------------------------------------|-----------------------------|----------------------|------------------------------|----------------------|
| <b>Acquisition Time (sec)</b> | 0.6783                                               | <b>Comment</b>              | Imported from UXNMR. | <b>Date</b>                  | 17 Dec 2022 13:44:02 |
| <b>File Name</b>              | C:\DOCS\OUTPUT_301\2022\12.декабрь\BM-2702.C_002001r |                             |                      | <b>Frequency (MHz)</b>       | 100.61               |
| <b>Nucleus</b>                | <sup>13</sup> C                                      | <b>Number of Transients</b> | 175                  | <b>Original Points Count</b> | 16384                |
| <b>Pulse Sequence</b>         | zgpg30                                               | <b>Solvent</b>              | DEUTERIUM OXIDE      | <b>Points Count</b>          | 131072               |
| <b>Temperature (degree C)</b> | 27.000                                               |                             |                      | <b>Sweep Width (Hz)</b>      | 24154.59             |

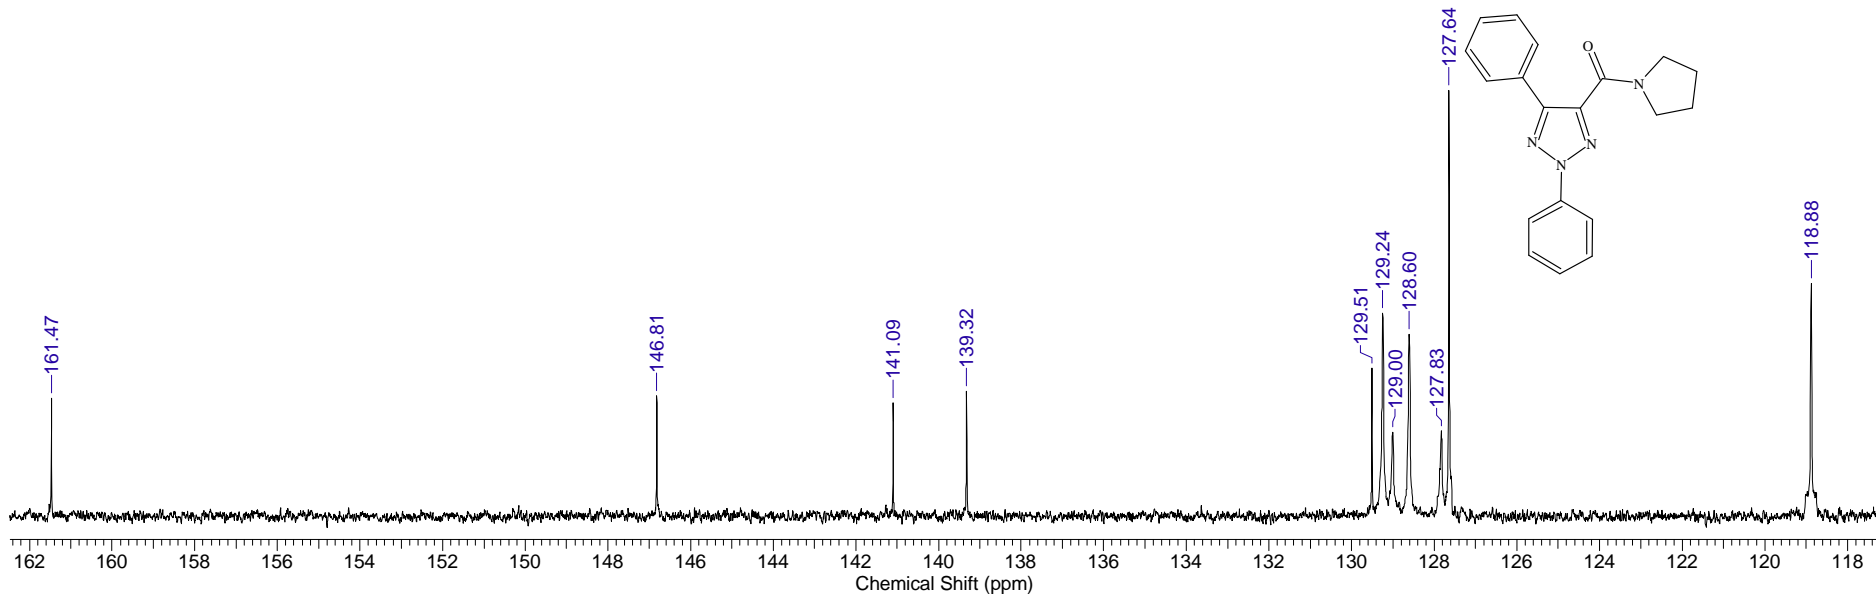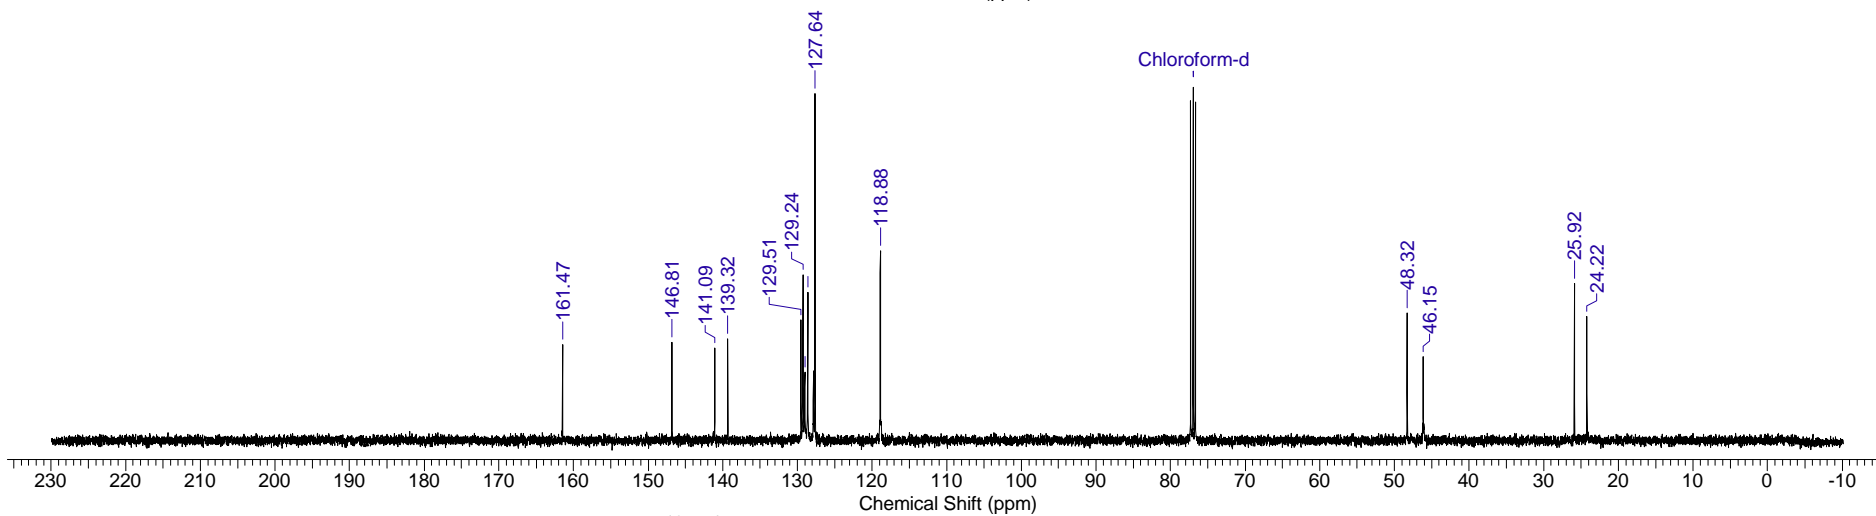<sup>13</sup>C{<sup>1</sup>H} NMR spectrum of **21** (100.6 MHz, CDCl<sub>3</sub>)

|                               |                                                            |                             |                      |                              |                      |
|-------------------------------|------------------------------------------------------------|-----------------------------|----------------------|------------------------------|----------------------|
| <b>Acquisition Time (sec)</b> | 4.0894                                                     | <b>Comment</b>              | Imported from UXNMR. | <b>Date</b>                  | 20 Dec 2022 14:25:18 |
| <b>File Name</b>              | C:\DOCS\OUTPUT_301\2022\12.декабрь\SA-BM-2706-16.H_001001r |                             |                      | <b>Frequency (MHz)</b>       | 400.13               |
| <b>Nucleus</b>                | <sup>1</sup> H                                             | <b>Number of Transients</b> | 4                    | <b>Original Points Count</b> | 32768                |
| <b>Pulse Sequence</b>         | zg30                                                       | <b>Solvent</b>              | CHLOROFORM-D         | <b>Points Count</b>          | 131072               |
| <b>Temperature (degree C)</b> | 27.000                                                     |                             |                      | <b>Sweep Width (Hz)</b>      | 8012.82              |

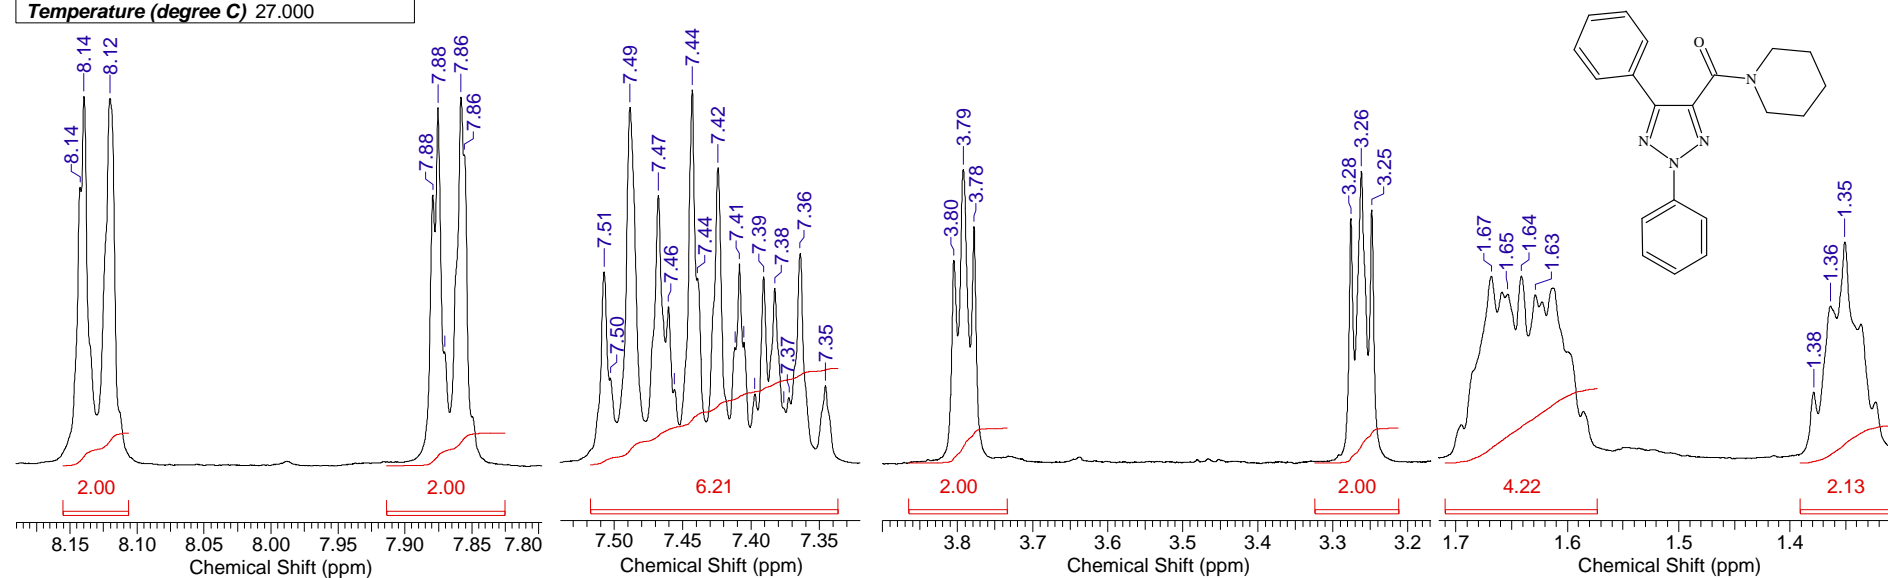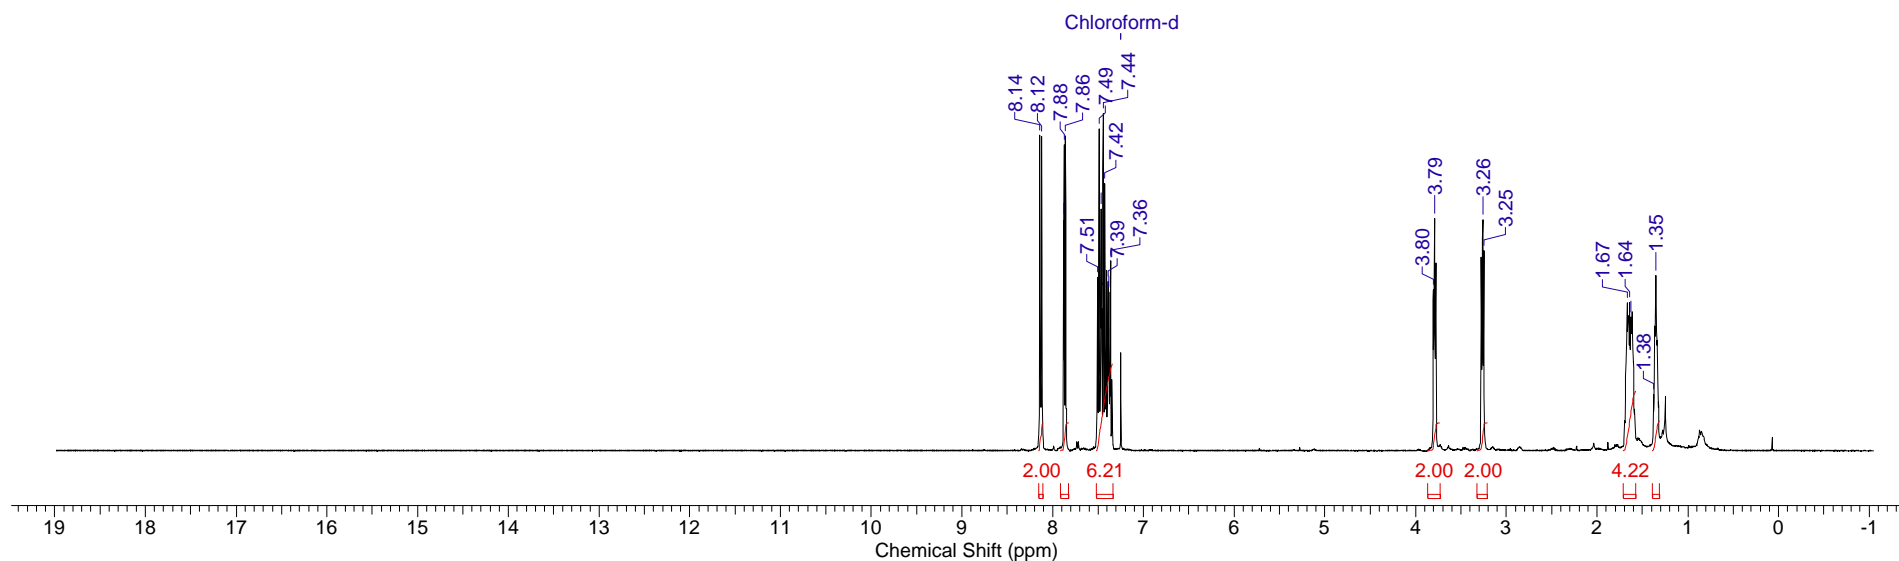<sup>1</sup>H NMR spectrum of **22** (400.1 MHz, CDCl<sub>3</sub>)

|                        |                                                            |                      |                      |                       |                 |                        |        |
|------------------------|------------------------------------------------------------|----------------------|----------------------|-----------------------|-----------------|------------------------|--------|
| Acquisition Time (sec) | 0.6783                                                     | Comment              | Imported from UXNMR. |                       | Date            | 20 Dec 2022 14:28:32   |        |
| File Name              | C:\DOCS\OUTPUT_301\2022\12_декабрь\SA-BM-2706-16.C_002001r |                      |                      |                       | Frequency (MHz) | 100.61                 |        |
| Nucleus                | 13C                                                        | Number of Transients | 65                   | Original Points Count | 16384           | Points Count           | 131072 |
| Pulse Sequence         | zgpg30                                                     | Solvent              | DMSO-D6              | Sweep Width (Hz)      | 24154.59        | Temperature (degree C) | 27.000 |

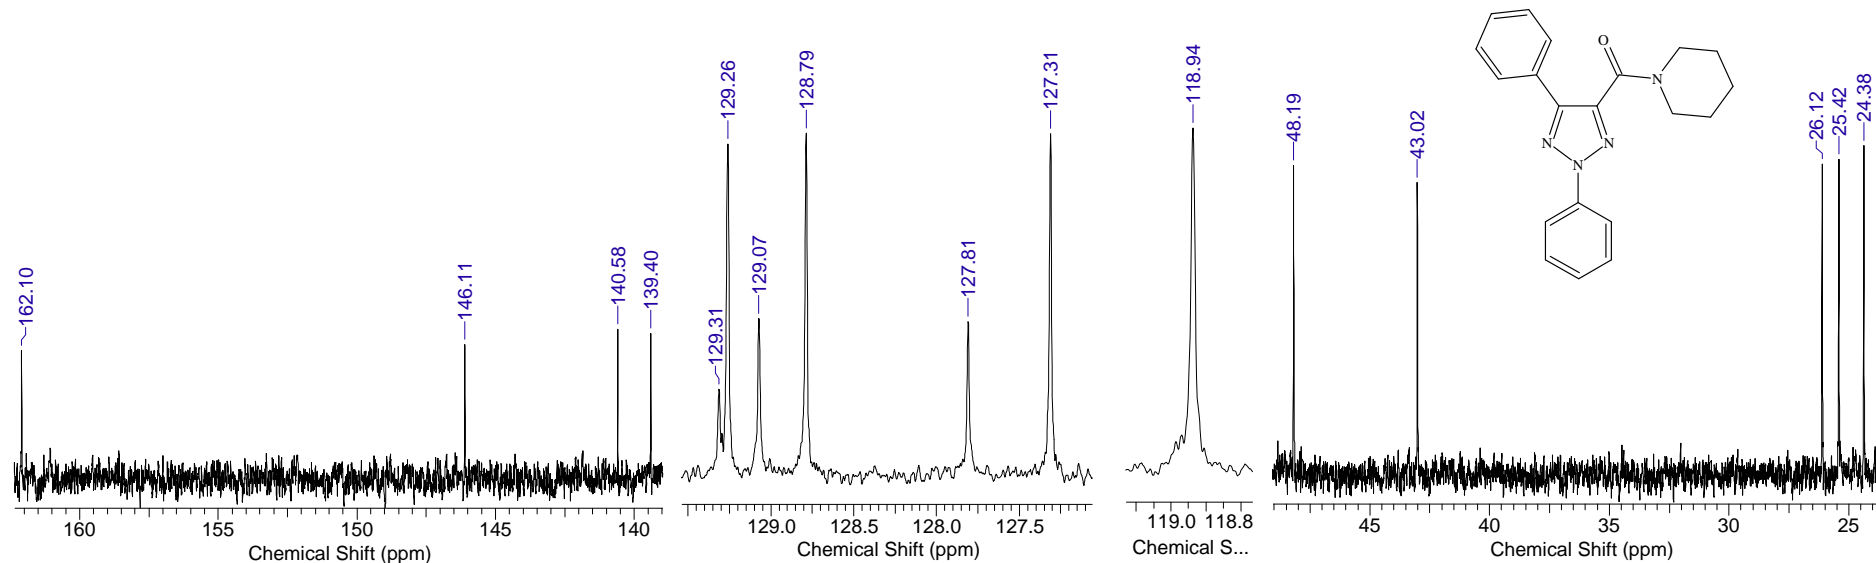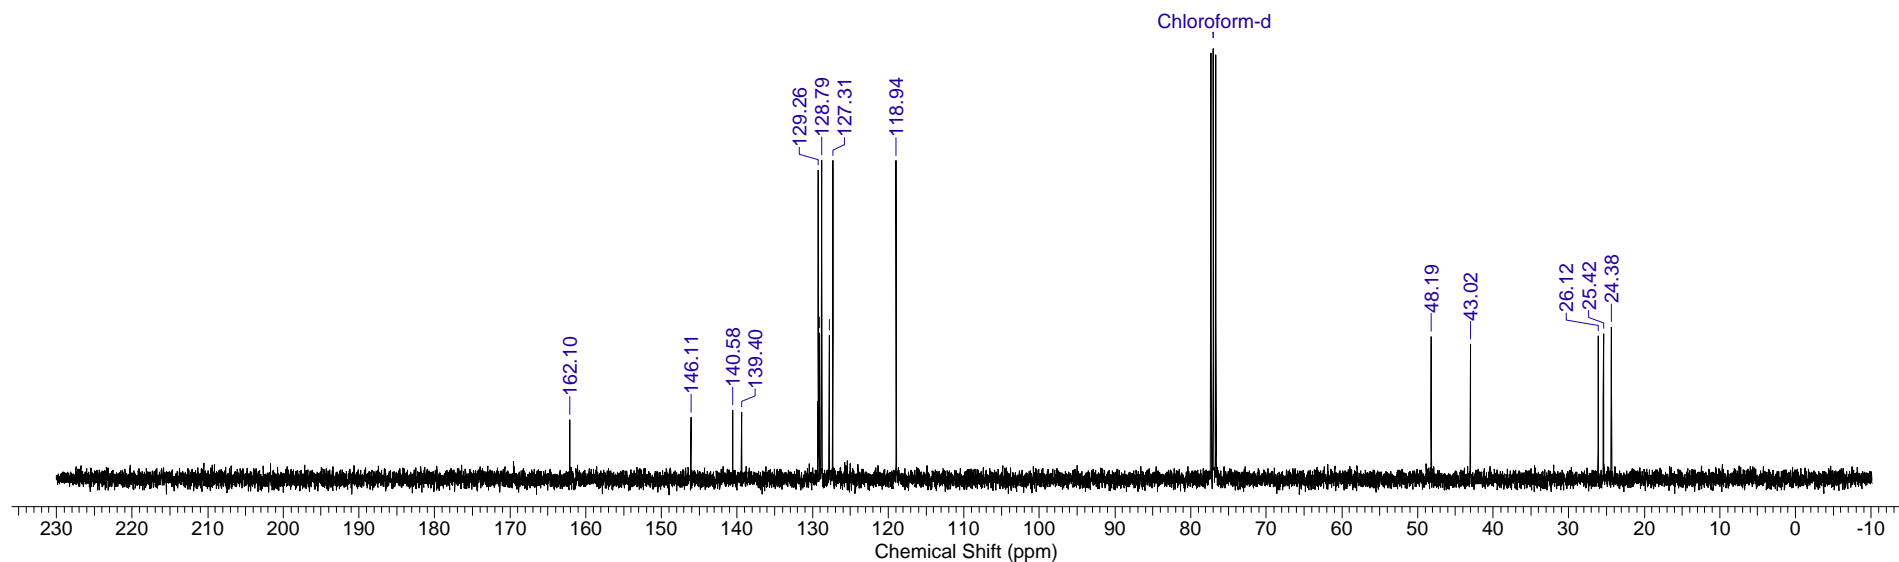<sup>13</sup>C{<sup>1</sup>H} NMR spectrum of **22** (100.6 MHz, CDCl<sub>3</sub>)

|                               |                                                             |                             |                      |                              |                      |
|-------------------------------|-------------------------------------------------------------|-----------------------------|----------------------|------------------------------|----------------------|
| <b>Acquisition Time (sec)</b> | 4.0894                                                      | <b>Comment</b>              | Imported from UXNMR. | <b>Date</b>                  | 20 Dec 2022 22:35:22 |
| <b>File Name</b>              | C:\BM_DATA\DOCS\ЯMP_соседи\2022\BM-2707-2\BM-2707-2_001001r |                             |                      | <b>Frequency (MHz)</b>       | 400.13               |
| <b>Nucleus</b>                | <sup>1</sup> H                                              | <b>Number of Transients</b> | 8                    | <b>Original Points Count</b> | 32768                |
| <b>Pulse Sequence</b>         | zg30                                                        | <b>Solvent</b>              | CHLOROFORM-D         | <b>Points Count</b>          | 131072               |
| <b>Temperature (degree C)</b> | 27.000                                                      |                             |                      | <b>Sweep Width (Hz)</b>      | 8012.82              |

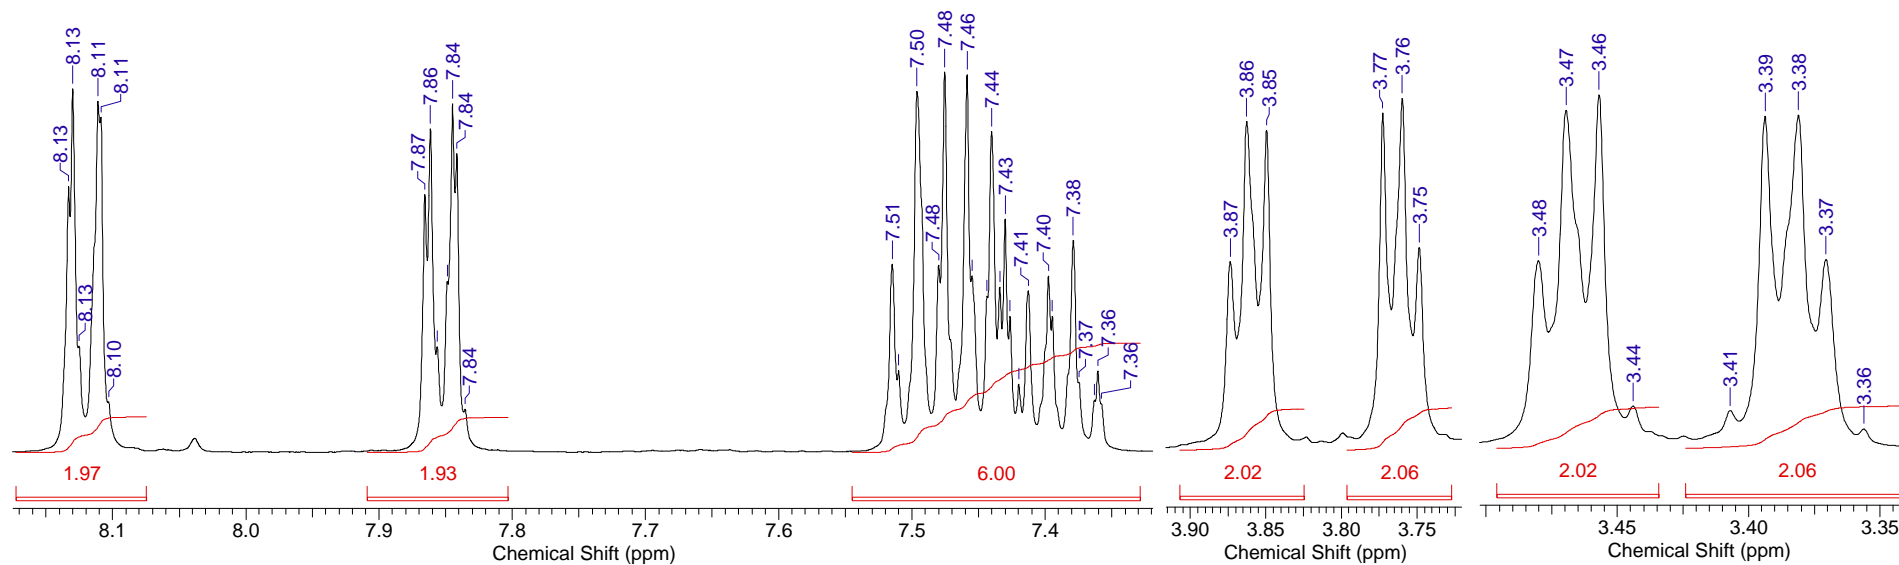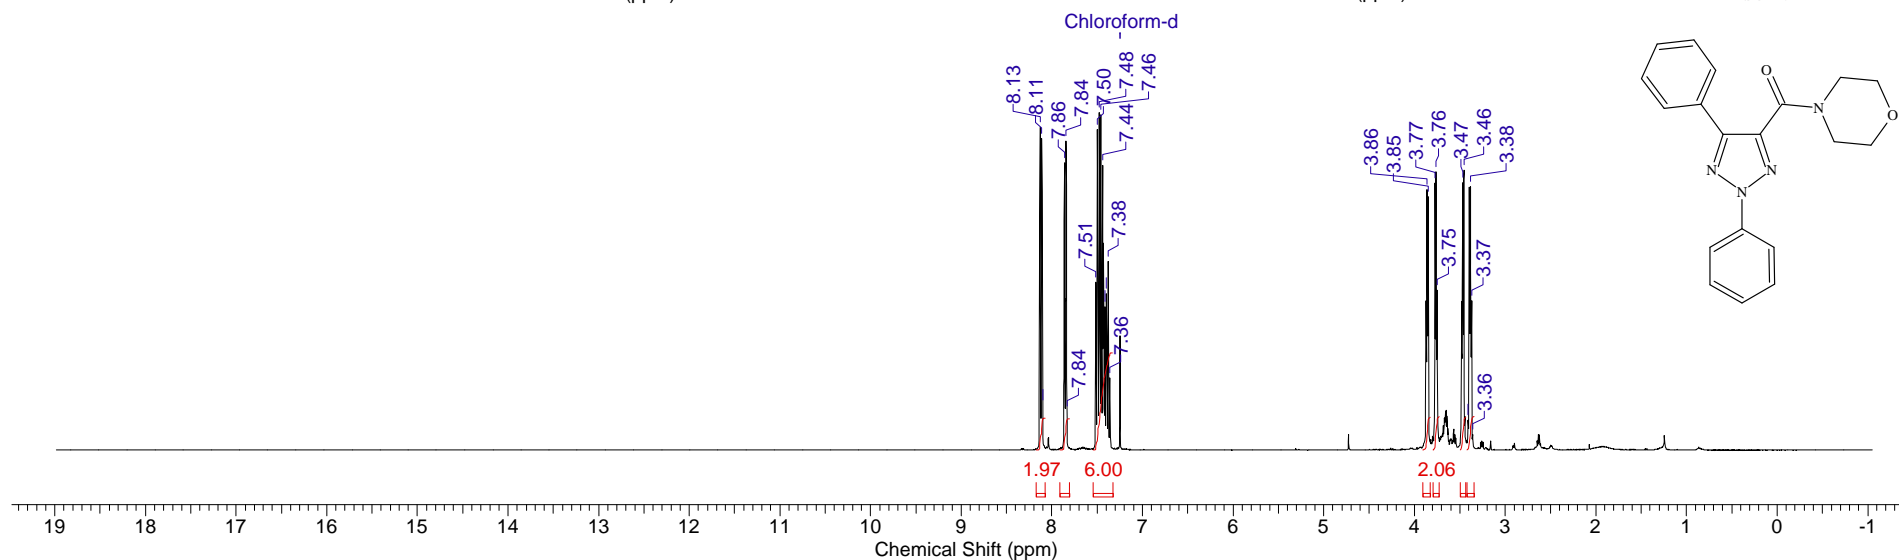<sup>1</sup>H NMR spectrum of **23** (400.1 MHz, CDCl<sub>3</sub>)

|                        |                                                             |                      |                      |                       |                  |                      |        |
|------------------------|-------------------------------------------------------------|----------------------|----------------------|-----------------------|------------------|----------------------|--------|
| Acquisition Time (sec) | 0.6783                                                      | Comment              | Imported from UXNMR. |                       | Date             | 20 Dec 2022 21:57:02 |        |
| File Name              | C:\BM_DATA\DOCS\JMP_соседи\2022\BM-2707-2\BM-2707-2_002001r |                      |                      |                       | Frequency (MHz)  | 100.61               |        |
| Nucleus                | 13C                                                         | Number of Transients | 96                   | Original Points Count | 16384            | Points Count         | 131072 |
| Pulse Sequence         | zgpg30                                                      | Solvent              | CHLOROFORM-D         |                       | Sweep Width (Hz) | 24154.59             |        |
| Temperature (degree C) | 27.000                                                      |                      |                      |                       |                  |                      |        |

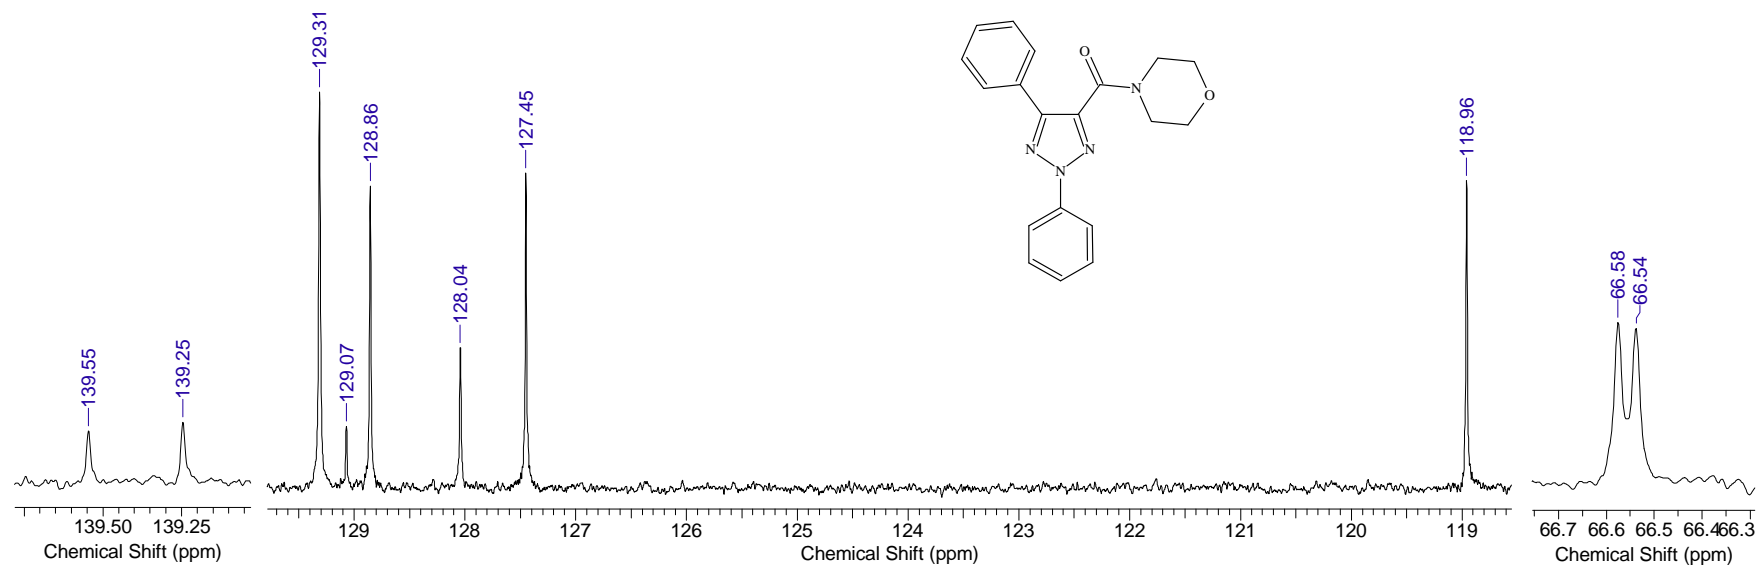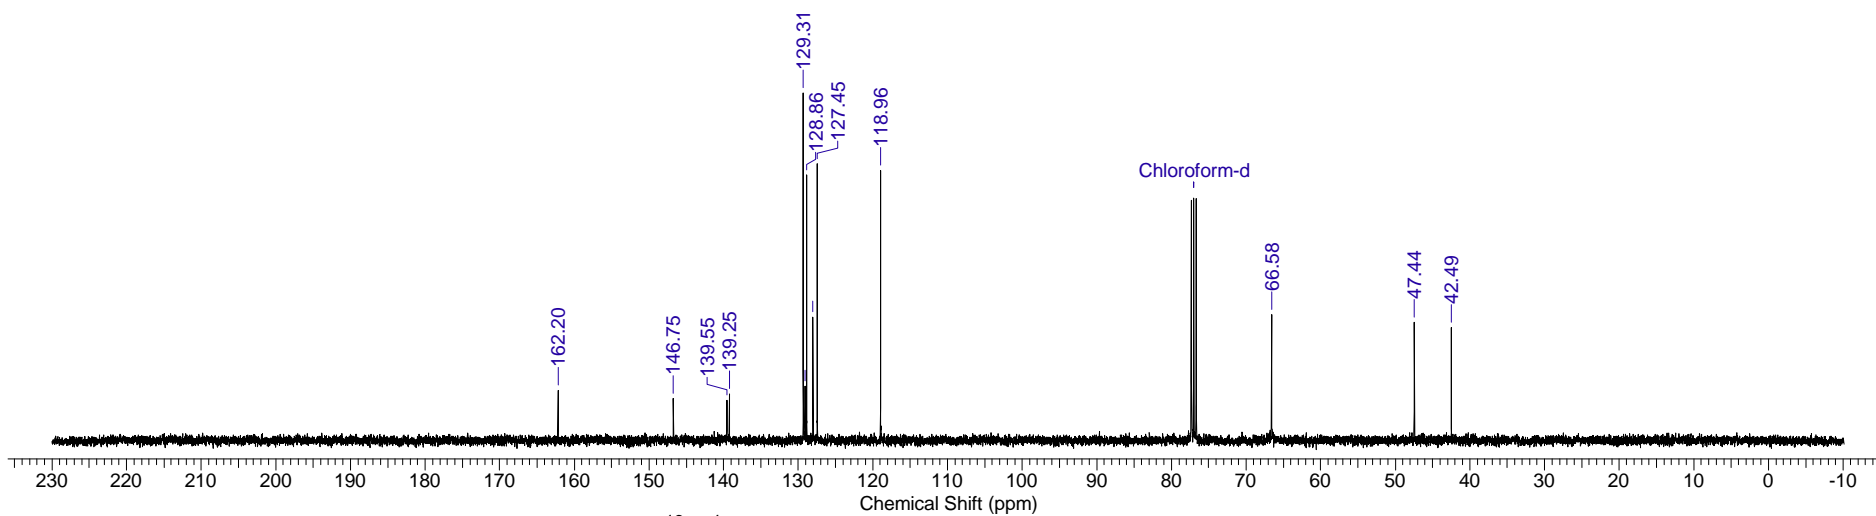<sup>13</sup>C{<sup>1</sup>H} NMR spectrum of **23** (100.6 MHz, CDCl<sub>3</sub>)

|                        |                                                      |                      |                      |                       |                  |                      |        |
|------------------------|------------------------------------------------------|----------------------|----------------------|-----------------------|------------------|----------------------|--------|
| Acquisition Time (sec) | 4.0894                                               | Comment              | Imported from UXNMR. |                       | Date             | 20 Dec 2022 14:19:10 |        |
| File Name              | C:\DOCS\OUTPUT_301\2022\12_декабрь\BM-2708.H_001001r |                      |                      |                       | Frequency (MHz)  | 400.13               |        |
| Nucleus                | 1H                                                   | Number of Transients | 4                    | Original Points Count | 32768            | Points Count         | 131072 |
| Pulse Sequence         | zg30                                                 | Solvent              | CHLOROFORM-D         |                       | Sweep Width (Hz) | 8012.82              |        |
| Temperature (degree C) | 27.000                                               |                      |                      |                       |                  |                      |        |

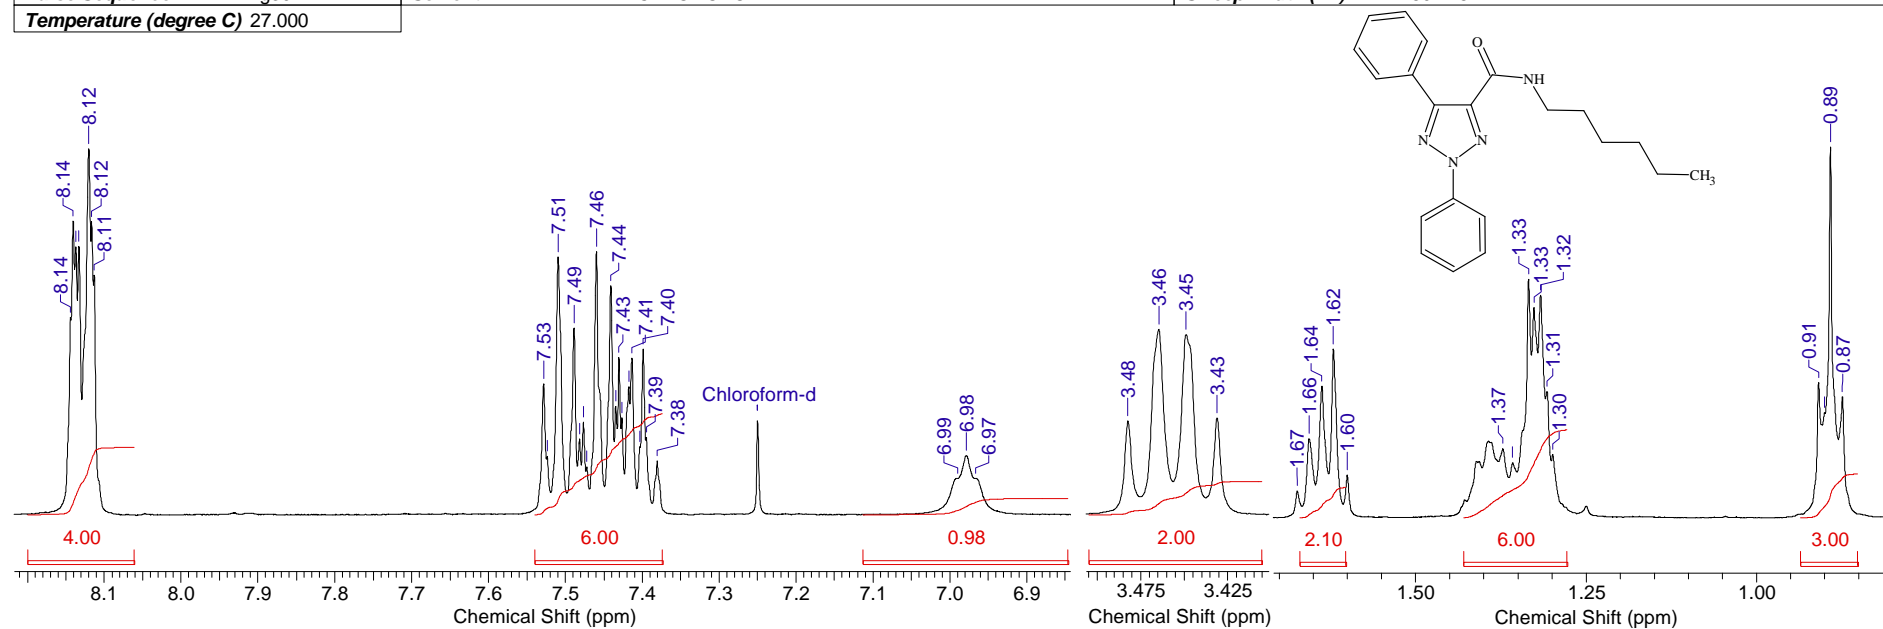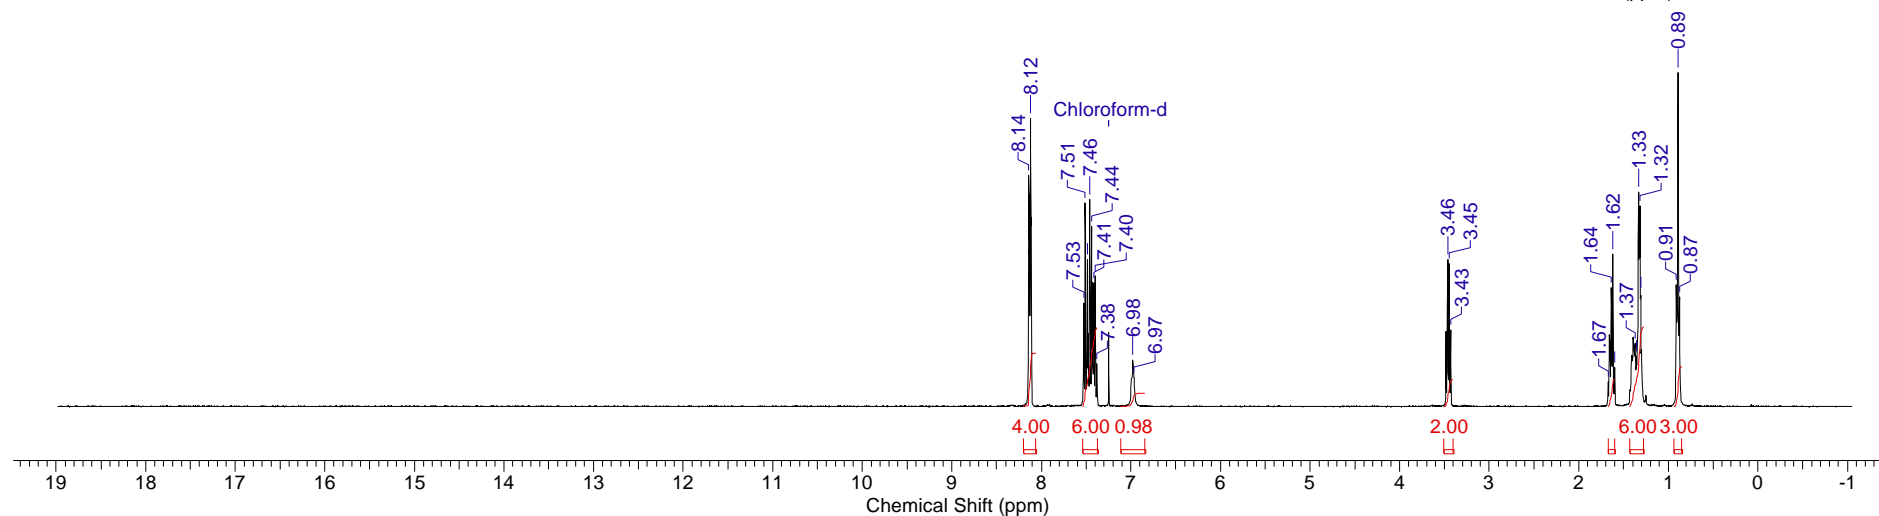<sup>1</sup>H NMR spectrum of **24** (400.1 MHz, CDCl<sub>3</sub>)

|                        |                                                      |                      |                      |                       |                 |                        |        |
|------------------------|------------------------------------------------------|----------------------|----------------------|-----------------------|-----------------|------------------------|--------|
| Acquisition Time (sec) | 0.6783                                               | Comment              | Imported from UXNMR. |                       | Date            | 20 Dec 2022 14:23:18   |        |
| File Name              | C:\DOCS\OUTPUT_301\2022\12_декабрь\BM-2708.C_002001r |                      |                      |                       | Frequency (MHz) | 100.61                 |        |
| Nucleus                | 13C                                                  | Number of Transients | 69                   | Original Points Count | 16384           | Points Count           | 131072 |
| Pulse Sequence         | zgpg30                                               | Solvent              | DMSO-D6              | Sweep Width (Hz)      | 24154.59        | Temperature (degree C) | 27.000 |

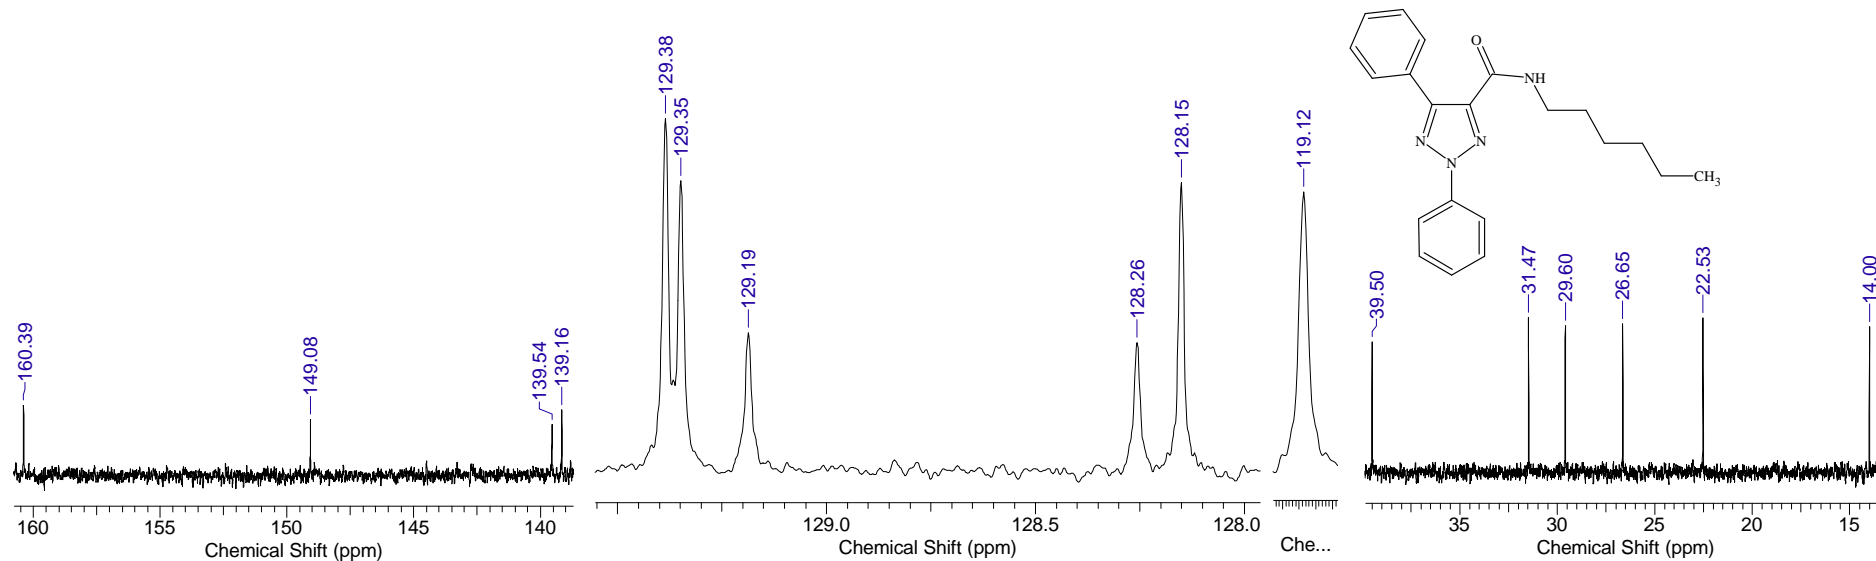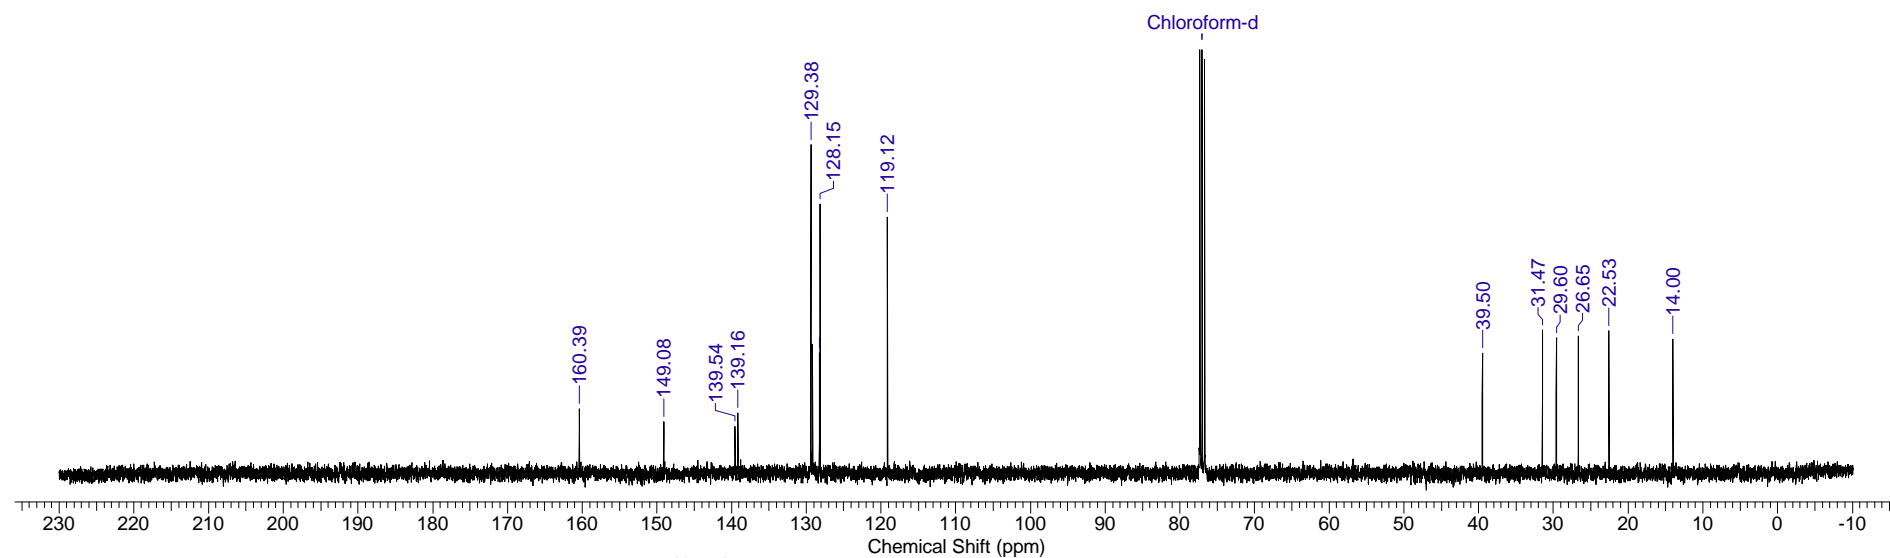<sup>13</sup>C{<sup>1</sup>H} NMR spectrum of **24** (100.6 MHz, CDCl<sub>3</sub>)
